# Supplementary material for: Beyond deaths per capita: comparative COVID-19 mortality indicators
Source: PubMed Central journal article supplement — BMJ Open. 2021 Mar 10;11(3):e042934. doi: 10.1136/bmjopen-2020-042934 (PMC7948156; doi:10.1136/bmjopen-2020-042934), 2021-03-10
Supplement: bmjopen-2020-042934.draft_revisions.pdf [file bmjopen-2020-042934.draft_revisions.pdf]

# BMJ Open

BMJ Open is committed to open peer review. As part of this commitment we make the peer review history of every article we publish publicly available.

When an article is published we post the peer reviewers' comments and the authors' responses online. We also post the versions of the paper that were used during peer review. These are the versions that the peer review comments apply to.

The versions of the paper that follow are the versions that were submitted during the peer review process. They are not the versions of record or the final published versions. They should not be cited or distributed as the published version of this manuscript.

BMJ Open is an open access journal and the full, final, typeset and author-corrected version of record of the manuscript is available on our site with no access controls, subscription charges or pay-per-view fees (<http://bmjopen.bmj.com>).

If you have any questions on BMJ Open's open peer review process please email [info.bmjopen@bmj.com](mailto:info.bmjopen@bmj.com)

# BMJ Open

## Beyond Deaths per Capita: Comparative CoViD-19 Mortality Indicators

|                               |                                                             |
|-------------------------------|-------------------------------------------------------------|
| Journal:                      | <i>BMJ Open</i>                                             |
| Manuscript ID                 | bmjopen-2020-042934                                         |
| Article Type:                 | Original research                                           |
| Date Submitted by the Author: | 20-Jul-2020                                                 |
| Complete List of Authors:     | Heuveline, Patrick; UCLA, CCPR<br>Tzen, Michael; UCLA, CCPR |
| Keywords:                     | COVID-19, PUBLIC HEALTH, STATISTICS & RESEARCH METHODS      |
|                               |                                                             |

SCHOLARONE™  
Manuscripts

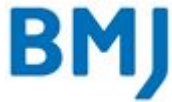

I, the Submitting Author has the right to grant and does grant on behalf of all authors of the Work (as defined in the below author licence), an exclusive licence and/or a non-exclusive licence for contributions from authors who are: i) UK Crown employees; ii) where BMJ has agreed a CC-BY licence shall apply, and/or iii) in accordance with the terms applicable for US Federal Government officers or employees acting as part of their official duties; on a worldwide, perpetual, irrevocable, royalty-free basis to BMJ Publishing Group Ltd ("BMJ") its licensees and where the relevant Journal is co-owned by BMJ to the co-owners of the Journal, to publish the Work in this journal and any other BMJ products and to exploit all rights, as set out in our [licence](#).

The Submitting Author accepts and understands that any supply made under these terms is made by BMJ to the Submitting Author unless you are acting as an employee on behalf of your employer or a postgraduate student of an affiliated institution which is paying any applicable article publishing charge ("APC") for Open Access articles. Where the Submitting Author wishes to make the Work available on an Open Access basis (and intends to pay the relevant APC), the terms of reuse of such Open Access shall be governed by a Creative Commons licence – details of these licences and which [Creative Commons](#) licence will apply to this Work are set out in our licence referred to above.

Other than as permitted in any relevant BMJ Author's Self Archiving Policies, I confirm this Work has not been accepted for publication elsewhere, is not being considered for publication elsewhere and does not duplicate material already published. I confirm all authors consent to publication of this Work and authorise the granting of this licence.

1  
2  
3 **Beyond Deaths per Capita:**  
4  
5 **Comparative CoViD-19 Mortality Indicators**  
6  
7

8  
9  
10 *Updated Version, 7/7/2020*

11  
12 *Original Manuscript Submitted 4/29/2020, Published 5/5/2020 at:*

13  
14  
15 <https://www.medrxiv.org/content/10.1101/2020.04.29.20085506v1>  
16

17  
18  
19 Patrick Heuveline, Ph.D. and Michael Tzen, M.S.

20  
21 California Center for Population Research (CCPR)

22  
23 University of California, Los Angeles (UCLA)  
24  
25

26  
27  
28 Contact author: Patrick Heuveline [heuveline@soc.ucla.edu](mailto:heuveline@soc.ucla.edu)  
29

30  
31 *Contributorship Statement*

32  
33 Patrick Heuveline designed the study, compiled the necessary demographic data and drafted this  
34  
35 manuscript. Mike Tzen wrote the webscraping routine that provides regularly updated data on  
36  
37 CoViD-19 global estimates and projections, and US age-and-sex pattern.  
38  
39

40  
41  
42 *Acknowledgment*  
43

44  
45 The authors benefited from facilities and resources provided by the California Center for  
46  
47 Population Research at UCLA (CCPR), which receives core support (P2C-HD041022) from the  
48  
49 Eunice Kennedy Shriver National Institute of Child Health and Human Development (NICHD).  
50  
51 The authors thank Patrick Gerland for clarifications regarding UN demographic data, and Sam  
52  
53 Preston and Jason Kerwin for comments on an earlier draft.  
54  
55

## **Beyond Deaths per Capita: Comparative CoViD-19 Mortality Indicators**

### **Abstract**

*Objectives:* Following well-established practices in demography, this article discusses several measures based on the number of CoViD-19 deaths to facilitate comparisons over time and across populations.

*Settings:* National populations in 186 UN countries and territories and populations in first-level sub-national administrative entities in Brazil, Italy, Mexico, Spain, and the US.

*Participants:* None (death statistics only).

*Primary and Secondary Outcome Measures:* The first measure is an unstandardized occurrence/exposure rate comparable to the Crude Death Rate. The second measure is an indirectly age-and-sex standardized rate that can be derived even when the breakdown of CoViD-19 deaths by age and sex required for direct standardization is unavailable. The last measure is the reduction in life expectancy at birth corresponding to the number of CoViD-19 deaths projected for 2020.

*Results:* To date, the highest unstandardized rate has been in New York, where at its peak it exceeded the state 2017 Crude Death Rate. For populations with a breakdown of CoViD-19 deaths by age and sex that allows for direct standardization, we show that direct and indirect standardization yield similar results. Populations compare differently after standardization: while New Jersey now has the highest unstandardized rate, Baja California (Mexico) has the highest standardized rate. US life expectancy is projected to decline this year by more (-.68 years) than the worst year of the HIV epidemic, or the worst three years of the opioid crisis, and to reach its

1  
2  
3 lowest level since 2008. Substantially larger reductions, exceeding two years, are projected for  
4  
5 Ecuador, Chile, New York, New Jersey and Peru.  
6

7  
8 *Conclusions:* With lesser demand on data than direct standardization, indirect standardization is a  
9  
10 valid alternative to adjust international comparisons for differences in population distribution by  
11  
12 sex and age-groups. Reductions in 2020 life expectancies will be substantial by recent historical  
13  
14 standards, in a number of populations.  
15  
16  
17  
18  
19  
20  
21

### 22 *Article Summary*

- 23  
24 • This article describes how to derive indicators of CoViD-19 mortality that follow well  
25  
26 established practices in demography, making them comparable to standard indicators of  
27  
28 overall mortality such as the Crude Death Rate or Life Expectancy at Birth  
29  
30
- 31 • In particular, this article shows that a technique known as indirect standardization allows  
32  
33 to take into account differences in age and sex distributions when comparing CoViD-19  
34  
35 death rates across populations, even when only the total numbers of CoViD-19 deaths  
36  
37 (not broken down by sex and age-group) are available for those populations  
38  
39
- 40 • Using global estimates of CoViD-19 deaths by countries and first sub-national entities in  
41  
42 several countries, the article illustrates how age-and-sex standardization corrects  
43  
44 comparisons across populations.  
45  
46
- 47 • However, both unstandardized and standardized rates remain dependent on the  
48  
49 duration/stage of the epidemic diffusion of the population and on the geographical scale  
50  
51 (i.e., country, region, agglomeration)  
52  
53  
54  
55  
56  
57  
58  
59  
60

- Life expectancy at birth estimates demand more data (extant life tables) but yields the most intuitive mortality measures (in years, rather than deaths or deaths per capita) and allows for comparison of mortality impacts but past public health crises

### *Data Sharing Statement*

Additional data are available on the Github repository:

<https://github.com/statsccpr/ind-cov-mort>

### *Ethics*

This study has no human subjects. Analyses are based solely on publicly available online data on anonymous, deceased individuals.

### *Funding*

The authors benefited from facilities and resources provided by the California Center for Population Research at UCLA (CCPR), which receives core support (P2C-HD041022) from the Eunice Kennedy Shriver National Institute of Child Health and Human Development (NICHD).

## Beyond Deaths per Capita

### *Background*

As of June 1<sup>st</sup>, deaths from the novel coronavirus disease 2019 (CoViD-19) had been reported in 186 of the 235 countries and territories of the United Nations system (UN). As with previous pandemics,<sup>1</sup> the disease progression can be more reliably tracked with death than with case counts. Cumulative CoViD-19 death counts at a given time depend on the determination of the cause of death, delays in reporting deaths to central reporting agencies—different for deaths at home, in hospitals and other institutions—and delays in verification, consolidation and publication at reporting agencies. In the US, for instance, the grim milestone of 100,000 cumulative CoViD-19 deaths was reached at the end of May, when data from the Center for Disease Control and Prevention (CDC) suggested that the number of deaths in the country exceeded expectations based on past trends by about 130,000.<sup>2</sup> While CoViD-19 deaths might not be fully reported, the death undercount is both easier to estimate and an order-of-magnitude smaller than the proportion of unreported cases. CDC data from large-scale seroprevalence surveys suggest that the number of actual cases might be as much as 10 times the number of confirmed cases<sup>3</sup>—a situation in no way unique to the US.<sup>4</sup> CoViD-19 mortality indicators are also more pertinent for assessing public-health measures that were intended less to reduce the eventual number of cases than to “flatten the curve” and eventually limit the number of CoViD-19 deaths by keeping the need for emergency hospitalizations below local hospital capacity.

For comparative purposes, cumulative death counts are affected by several demographic characteristics such as, most obviously, population size. The deaths per capita ratio, however, represent the first rather than the only adjustment that can be taken towards more meaningful CoViD-19 mortality comparisons. Following well-established practices in demography,<sup>5</sup> this



1  
2  
3 article presents additional indicators that can be derived with additional demographic data. The  
4  
5 corresponding measures are discussed using results for the 186 UN countries and territories with  
6  
7 at least one death by June 1<sup>st</sup>. To illustrate issues of scale, the measures are also calculated at the  
8  
9 first sub-national administrative level in China, the US, Brazil, Mexico, Italy and Spain—a total  
10  
11 of 362 national and subnational populations.  
12  
13

#### 14 *Methods and Data*

15  
16 We first calculate an occurrence/exposure *rate*, the period Crude CoViD-19 Death Rate (*CCDR*):  
17  
18

$$19 \quad CCDR[t_1, t] = \frac{D^C[t_1, t]}{N(t_m) \cdot (t - t_1)}$$

20  
21 where  $t_1$  is an initial time,  $D^C[t_1, t]$  a cumulative CoViD-19 deaths count between times  $t_1$  and  $t$ ,  
22  
23 and  $N(t_m)$  an estimate of the total population size at time  $t_m$  between time  $t_1$  and time  $t$ . The  
24  
25 difference between this period rate and the deaths per capita ratio is easy to miss when the deaths  
26  
27 count in the numerator, identical for both, is an annual number of deaths. In that case, the  
28  
29 number of person-years in the denominator of the occurrence/exposure rate can indeed be  
30  
31 approximated by population size at some point during the year. However, the two are no longer  
32  
33 directly comparable, and the metric of the ratio difficult to interpret, when the deaths counts  
34  
35 correspond to periods of different durations. On the contrary, the *CCDR* is expressed in deaths  
36  
37 per person-*year* and remains directly comparable to the annual Crude Death Rate (*CDR*)  
38  
39 available for most populations. We first calculate the *CCDR* for the period starting on the day of  
40  
41 the first death in the population, which was obtained from World Health Organization (WHO)  
42  
43 daily situation reports,<sup>6</sup> and ending on June 12. The estimated deaths count on that day was  
44  
45 obtained from Johns Hopkins University's Center for Systems Science and Engineering (CSSE)<sup>7</sup>  
46  
47 and total population size was obtained from the UN.<sup>8</sup> (Additional sources used for sub-national  
48  
49 units are referenced in the Technical Appendix.) Using projections from the University of  
50  
51  
52  
53  
54  
55  
56  
57  
58  
59  
60

Washington's Institute for Health Metrics and Evaluation (IHME),<sup>9</sup> we also calculate a *CCDR* for the period ending on October 1.

As age and sex variations in CoViD-19 mortality have been clearly established,<sup>10</sup> the period rates should be adjusted to take into account differences in age and sex distributions. Direct age-and-sex standardization requires data on CoViD-19 deaths by age and sex, which are unavailable or unreliable for a majority of UN countries and territories and most sub-national populations. An alternative approach, known as indirect standardization, borrows an age-and-sex pattern of mortality from a well-documented population so that only the age-and-sex distribution of the populations of interest is required. Based on this approach, we calculate the Comparative CoViD-19 Mortality Ratio (*CCMR*):

$$CCMR[t_1,t] = \frac{D^c[t_1,t]}{\sum_j \sum_i^{US} M_{ij}^C \cdot N_{ij}(t_m)}$$

where  $^{US}M_{ij}^C$  is the CoViD-19 death rate specific to age group  $i$  and sex  $j$  in the US and  $N_{ij}(t_m)$  is the size of the age group  $i$  for sex  $j$  in the population of interest. The reference age-and-sex death rates were obtained from the Centers for Disease Control and Prevention (CDC) weekly-updated distribution of CoViD-19 deaths by age and sex in the US,<sup>11</sup> selected because this is to date the largest number of CoViD-19 deaths distributed by age and sex. Unavailable only for the 13 countries/territories whose population size is less than 90,000, population age-and-sex distributions were taken from the UN data and, for subnational populations, national statistics.

Multiplying a population *CCMR* by the US *CCDR* yields an Indirectly age-and-sex Standardized CoViD-19 Death Rate (*ISCDR*) for that population, with the US age-and-sex population distribution as the standard:

$$ISCDR[t_1,t] = \sum_j \sum_i ({}^{US}M_{ij}^C \cdot CCMR[t_1,t]) \cdot {}^{US}N_{ij}(t_m)$$

1  
2  
3 *CCMR* and *ISCDR* are again calculated both for CSSE current estimates and IHME October-1  
4  
5 projections.  
6

7  
8 Last, life expectancy at birth provides a summary indicator of mortality in a population in  
9  
10 a more intuitive metric (years) than these rates. A standard demographic technique allows to  
11  
12 estimate the impact that *eliminating* a cause of death would have on life expectancy at birth.  
13

14  
15 When a prior period life table (i.e., not factoring CoViD-19 mortality) is available, applying this  
16  
17 technique backward allows to translate a cumulative CoViD-19-deaths forecast for the same  
18  
19 period into a CoViD-19-induced *reduction* in male and female life expectancies at birth.  
20

21  
22 Although they pertain to October 1<sup>st</sup>, the IHME projections were used as conservative  
23  
24 projections of the cumulative number of CoViD-19 deaths in 2020 to derive new male and  
25  
26 female life expectancies at birth in 244 populations with extant life tables (153 countries, plus  
27  
28 Italian regions, Spanish autonomous communities and US states). Calculations required a  
29  
30 previous projection of the male and female year-2020 life tables in these populations. For  
31  
32 countries, these were again derived from UN data, by interpolation between the 2015-20  
33  
34 estimates and 2020-25 projections. For sub-national populations, life tables available from  
35  
36 national statistical institutes were extrapolated to 2020. Additional details on their calculation are  
37  
38 described in the online supplementary materials of this article.  
39  
40

41  
42 Patient and Public Involvement: This research was done without patient involvement. Patients  
43  
44 were not invited to comment on the study design and were not consulted to develop patient  
45  
46 relevant outcomes or interpret the results. Patients were not invited to contribute to the writing  
47  
48 or editing of this document for readability or accuracy.  
49  
50  
51  
52  
53  
54  
55  
56  
57  
58  
59  
60

## Results

To illustrate the properties of these indicators, we briefly describe results from the July-3 updates of the CCSE, IHME and CDC data. (Full results for that week, ranked on *CCMR* values, are also available in the online supplementary materials of this article). Across countries, Belgium has the highest current-period *CCDR* value (2.78 per thousand), followed by the United Kingdom, Spain, Sweden, Italy, France and the US (1.15 per thousand). Four Italian regions, 4 Spanish autonomous communities and 6 US states have higher current-period *CCDR* value than Belgium, with the highest *CCDR* currently in New Jersey (5.58 per thousand).

The main motivation for the *CCDR* is not to compare CoViD-19 mortality across populations, however, but rather to compare CoViD-19 and overall mortality. The highest *CCDR* value to date has been reached in New York (9.44 per thousand on 4/25) where it exceeded the state's most recent annual *CDR* (7.83 per thousand in 2017).<sup>12</sup> The period *CCDR* remained above the 2017 *CDR* until May 20 (Figure 1). Ignoring seasonality and period trends in overall mortality, this indicates roughly equivalent mortality from CoViD-19 and from all other causes combined between March 14 (first death) and May 20.

\*Figure 1 here\*

Figure 1: Estimated value of the period *CCDR*, New York (in deaths per 1,000 person-years, period starting on March 14 and ending on day shown on the horizontal axis)

Sources: CDC (*CDR*) and authors' calculations (*CCDR*, see technical appendix)

The effects of indirect age-standardization are illustrated in Figure 2, comparing current-period *CCDR* and *ISCDR* values for selected national and subnational populations. By construction, the *CCMR* equals 1 and the *CCDR* and *ISCDR* are the same in the US, but the standardized *ISCDR* is lower than the unstandardized *CCDR* in Europe, whereas the standardized

1  
2  
3 rate can be two to three times the unstandardized rate in Mexico and South American countries.  
4  
5 Baja California (Mexico) currently has the highest standardized rate. Several other Mexican  
6  
7 (e.g., Mexico City) and Brazilian States (e.g., Ceara, Rio de Janeiro) have standardized rates  
8  
9  
10 lower than New Jersey and New York, but higher than Lombardy or Madrid.  
11

12 \*Figure 2 here\*

13  
14 Figure 2: Estimated value of the *CCDR* and *ISCDR* (in deaths per 1,000 person-years), by country and  
15  
16 subnational unit (countries and subnational units with the largest *ISCDR* values and a population size over  
17  
18 10 million plus subnational units with the largest *ISCDR* in their respective countries)  
19

20  
21 Sources: Authors' calculations (see technical appendix)  
22  
23

24 As for the future mortality impact, the largest projected reductions in 2020 life  
25  
26 expectancies at birth are in South America and the US, exceeding two years in Ecuador, Chile,  
27  
28 New York, New Jersey and Peru. Excluding countries still early in the diffusion of the virus and  
29  
30 for which projections remain unstable (defined as below the current *CCDR* threshold of .5 deaths  
31  
32 per thousand person-years), Figure 3 shows reductions exceeding 1.3 years are also projected for  
33  
34 Brazil, Mexico, four additional US states, as well as subnational populations in Italy (Lombardy  
35  
36 and Aosta Valley) and Spain (Community of Madrid).  
37  
38

39  
40 \*Figure 3 here\*

41  
42 Figure 3: Estimated reduction in life expectancy at birth for year 2020, both sexes (in years), by country  
43  
44 and subnational unit (countries and subnational units with a current *CCDR* equal or larger than .5 deaths  
45  
46 per thousand person-years)  
47

48  
49 Sources: Authors' calculations (see technical appendix)  
50  
51

52 Reduction in life expectancy at birth is both an age standardized and an easily  
53  
54 interpretable metric. In particular, it allows for comparing the mortality impact of CoViD-19  
55  
56  
57  
58  
59

1  
2  
3 with prior public health crises that might have interrupted the secular increase in life  
4  
5 expectancies. While the projected reduction in the US (-.68 years) is much lower than in the  
6  
7 populations shown in Figure 3, for instance, CoViD-19 would still reduce life expectancy this  
8  
9 year by more than the worst year of the HIV epidemic (from 75.8 years in 1992 to 75.5 years in  
10  
11 1993), or the worst three years of the opioid-overdose crisis (from 78.9 years in 2014 to 78.6  
12  
13 years in 2017).<sup>13</sup> As illustrated in Figure 4, CoViD-19 is projected to reduce US life expectancy  
14  
15 at birth in 2020 to its lowest level since 2008.  
16  
17  
18  
19

20 \*Figure 4 here\*

21  
22 Figure 4: Estimated life expectancy at birth, U.S. population, both sexes, by year

23 Sources: CDC (2009-2017), UN and authors' calculations (2017-2020, see technical appendix)

### 24 25 26 27 28 *Discussion*

29  
30 The results above illustrate the properties of different comparative indicators of CoViD-19  
31  
32 mortality. For comparisons across populations, the *ISCDR*, and *CCMR* on which it builds,  
33  
34 control for 3 important factors that contribute to the cumulative count of CoViD-19 deaths in a  
35  
36 population: the length of the period over which these deaths are cumulated, the size of the  
37  
38 population, and its age-and-sex composition.  
39  
40

41 With respect to the first of these three factors, both the unstandardized and standardized  
42  
43 rates are period indicators that increase and decrease as waves of the pandemic develop.  
44  
45

46 Contrary to the death per capita ratio, which can only increase over time, the period rates begin  
47  
48 to decline when the daily number of additional deaths drops below its average for the period.  
49  
50

51 This property of the period rates accurately reflects for CoViD-19 mortality a temporal  
52  
53 dimension that can often be neglected for overall mortality. This also implies, however, that  
54  
55 comparing *ISCDR* values across populations at too different durations of exposure to CoViD-19  
56  
57  
58  
59

1  
2  
3 would not be meaningful. As shown in Figure 1, this is more problematic early in the diffusion  
4  
5 of the epidemic.  
6

7  
8 With respect to the second factor, comparing *ISCDR* values at the national or sub-  
9  
10 national levels illustrate that dividing for population size does not completely remove the effects  
11  
12 of scale. To illustrate this, we estimated standardized rates at the first sub-national administrative  
13  
14 level in several countries, selected for both their size and within-country differences in CoViD-  
15  
16 19 mortality. This showed that if Belgium, followed by 5 other European countries, still have the  
17  
18 highest period *CCDR* values, several sub-national populations in Brazil, Italy, Mexico, Spain and  
19  
20 the US with populations over 10 million have higher *CCDR* values than Belgium (with 11.6  
21  
22 million inhabitants).  
23  
24

25  
26 Disaggregation to smaller administrative units may allow for more meaningful  
27  
28 comparisons, but might be impeded by data availability. In this respect, indirect standardization  
29  
30 has the advantage of not requiring data on CoViD-19 deaths by age and sex that may not be  
31  
32 available or reliable for smaller areas. As a breakdown of CoViD-19 deaths *is* available from a  
33  
34 number of European countries<sup>14</sup> and US states, the *ISCDR* can actually be compared to a Directly  
35  
36 age-and-sex Standardized CoViD-19 Death Rate (*DSCDR*) with the US age-and-sex population  
37  
38 distribution as the standard. Comparing unstandardized with directly and indirectly standardized  
39  
40 rate 7 European countries and 6 states, Figure 5 shows that indirect standardization is a valid  
41  
42 alternative to direct standardization.  
43  
44  
45

46  
47 \*Figure 5 here\*  
48

49 Figure 5: Estimated value of the *CCDR*, *ISCDR* and *DSCDR* (in deaths per 1,000 person-years), by  
50  
51 country and state (countries and subnational units with a population size over 10 million and the largest  
52  
53 *ISCDR* values)  
54

55 Sources: CDC, Ined and authors' calculations (see technical appendix)  
56  
57  
58  
59

1  
2  
3 Substantial uncertainties remain as regards the direct and indirect mortality impact of the  
4 pandemic. The direct impact concerns the number of CoViD-19 deaths, for which the main  
5 factors of uncertainty are (1) the degree to which CoViD-19 deaths have been properly reported  
6 as the cause of death and (2) the future diffusion and fatality rate of the virus. With respect to the  
7 latter, the CDC currently tracks no less than 15 forecasting models.<sup>15</sup> Our choice of the IHME  
8 projections among those to illustrate the properties of the different indicators was not based on a  
9 quality assessment, which would be beyond our expertise. The IHME projections have a broader  
10 international coverage and longer time horizon that made them more suitable to illustrate the  
11 various indicators than other models. Comparisons with other models when populations and  
12 horizons overlap do not show the IHME projections as particularly alarmist. Adding that the  
13 current projections do not include any “second wave” of CoViD-19 deaths, the cumulative  
14 number of CoViD-19 deaths in 2020 appears more likely to be higher than lower than the  
15 numbers used here to calculate future rates and life expectancy reductions.  
16  
17  
18  
19  
20  
21  
22  
23  
24  
25  
26  
27  
28  
29  
30  
31  
32

33 The indirect impact refers to the “downstream” effects of the pandemic and mitigating  
34 policies on mortality from other causes. As mentioned above, recent CDC data suggest that the  
35 cumulative number of CoViD-19 deaths does not fully account for the overall increase in  
36 mortality, which could be due to under-reporting of CoViD-19 as a cause of death or an increase  
37 in other-cause mortality. All else equal, 2020 life-expectancy reductions would be under-  
38 estimated, regardless of whether CoViD-19 deaths are under-reported or mortality from other  
39 causes increases, because reductions are estimated on the assumption that mortality from other  
40 causes remains unchanged. We cannot rule out, however, a decline of mortality from other  
41 causes that would have been hidden initially by under-reporting of CoViD-19 deaths. In this  
42 case, the indirect impact would partially compensate the direct mortality impact of CoViD-19.<sup>16</sup>  
43  
44  
45  
46  
47  
48  
49  
50  
51  
52  
53  
54  
55  
56  
57  
58  
59  
60



1  
2  
3 To be sure, the rapidly evolving data and understanding of CoViD-19 mortality will  
4 likely continue to require frequent updates and flexibility. We update the values of the indicators  
5 discussed above weekly from updates of the CCSE, IHME and CDC data and shared them on a  
6 Github repository.<sup>17</sup> These calculations can easily be customized for different periods, different  
7 geographical scales, or to accommodate uncertainty across different sources of estimates and  
8 forecast.  
9  
10  
11  
12  
13  
14  
15  
16  
17  
18

### 19 Summary

20  
21 *What is already known?* The number of CoViD-19 deaths more reliably tracks the progression of  
22 the disease across populations than the number of confirmed cases. Substantial age and sex  
23 differences in CoViD-19 death rates imply that the number of deaths should be adjusted not just  
24 for the total size of the population, but also for its age-and-sex distribution.  
25  
26  
27  
28  
29

30  
31 *What are the new findings?* Indirect standardization produces results quite comparable to those  
32 resulting from direct standardization without requiring CoViD-19 deaths by age and sex.  
33  
34

35 Applying indirect standardization, Baja California (Mexico) appears to have the highest CoViD-  
36 19 death rate. When available, extant life tables allow to measure the CoViD-19-induced  
37 reduction in life expectancy at birth, which according to current projections will exceed two  
38 years in Ecuador, Chile, New York, New Jersey and Peru. To put these in perspective, the .68-  
39 year reduction projected for the US would reduce life expectancy this year by more than the  
40 worst year of the HIV epidemic, or the worst three years of the opioid crisis, and down to its  
41 lowest level since 2008.  
42  
43  
44  
45  
46  
47  
48  
49

50  
51 *What do the new findings imply?* Age-and-sex standardization reveals the emergence of Mexico  
52  
53  
54  
55  
56  
57  
58  
59  
60

1  
2  
3 and several South American countries as the most affected by CoViD-19 mortality. Reductions  
4  
5 in 2020 life expectancy in these countries and some US states will be substantial.  
6  
7  
8  
9  
10  
11  
12  
13  
14  
15  
16  
17  
18  
19  
20  
21  
22  
23  
24  
25  
26  
27  
28  
29  
30  
31  
32  
33  
34  
35  
36  
37  
38  
39  
40  
41  
42  
43  
44  
45  
46  
47  
48  
49  
50  
51  
52  
53  
54  
55  
56  
57  
58  
59  
60

## References

<sup>1</sup> Brookmeyer R & Gail MH. AIDS epidemiology: a quantitative approach. Oxford, England: Oxford University Press, 1994.

<sup>2</sup> Centers for Disease Control and Prevention. Commercial Laboratory Seroprevalence Survey Data. [https://www.cdc.gov/nchs/nvss/vsrr/covid19/excess\\_deaths.htm](https://www.cdc.gov/nchs/nvss/vsrr/covid19/excess_deaths.htm). Last used June 9, 2020.

<sup>3</sup> Centers for Disease Control and Prevention. Excess deaths associated with COVID-19. <https://www.cdc.gov/coronavirus/2019-ncov/cases-updates/commercial-lab-surveys.html>. Last used July 2, 2020.

<sup>4</sup> Modi C, Boehm V, Ferraro S, et al. How deadly is COVID-19? A rigorous analysis of excess mortality and age-dependent fatality rates in Italy. <https://www.medrxiv.org/content/10.1101/2020.04.15.20067074v3>. May 14, 2020.

<sup>5</sup> Preston SH, Heuveline P & Guillot M. Demography: measuring and modeling population processes. Blackwell: Malden, MA, Oxford, England & Carlton, Australia, 2001.

<sup>6</sup> World Health Organization. Daily situation reports. <https://www.who.int/emergencies/diseases/novel-coronavirus-2019/situation-reports/>. Last used June 2, 2020.

<sup>7</sup> Dong E, Du H & Gardner L. An interactive web-based dashboard to track COVID-19 in real time. *The Lancet Inf Dis* (forthcoming). [https://www.thelancet.com/journals/laninf/article/PIIS1473-3099\(20\)30120-1/fulltext](https://www.thelancet.com/journals/laninf/article/PIIS1473-3099(20)30120-1/fulltext). February 19, 2020.

<sup>8</sup> United Nations, Department of Economic and Social Affairs, Population Division. World Population Prospects 2019, Online Edition. Rev. <https://population.un.org/wpp/Download/Standard/CSV/>. Last used June 2, 2020.

<sup>9</sup> University of Washington, Institute for Health Metrics and Evaluation. COVID-19 projections. <https://covid19.healthdata.org/>. Last used June 12, 2020.

<sup>10</sup> Centers for Disease Control and Prevention. Provisional COVID-19 death counts by sex, age and state. <https://data.cdc.gov/NCHS/Provisional-COVID-19-Death-Counts-by-Sex-Age-and-S/9bhg-hcku>. Last used June 12, 2020.

1  
2  
3  
4  
5  
6  
7  
8  
9  
10  
11  
12  
13  
14  
15  
16  
17  
18  
19  
20  
21  
22  
23  
24  
25  
26  
27  
28  
29  
30  
31  
32  
33  
34  
35  
36  
37  
38  
39  
40  
41  
42  
43  
44  
45  
46  
47  
48  
49  
50  
51  
52  
53  
54  
55  
56  
57  
58  
59  
60

---

<sup>11</sup> Dowd JB, Andriano L, Brazel DM, et al. Demographic science aids in understanding the spread and fatality rates of COVID-19. PNAS 2020,117: 9696-8. <https://doi.org/10.1073/pnas.2004911117>

<sup>12</sup> Kochanek KD., Murphy SL, Xu JQ & Arias E. 2019. Deaths: final data for 2017. NVSR 2019,68(9). Hyattsville, MD: National Center for Health Statistics.

<sup>13</sup> Arias E, & Xu JQ. United States life tables, 2017. NVSR 2019,68(7). Hyattsville, MD: National Center for Vital Statistics.

<sup>14</sup> National Institute for Demographic Studies (INED). The demographics of COVID-19 deaths. <https://dc-covid.site.ined.fr/en/>. Last used June 9, 2020.

<sup>15</sup> Centers for Disease Control and Prevention. COVID-19 forecasts: Cumulative deaths. <https://www.cdc.gov/coronavirus/2019-ncov/covid-data/forecasting-us.html>. Last used June 9, 2020.

<sup>16</sup> Guillot M & Khlal M. 2020. Epidémie de Covid-19: quell impact sur l'espérance de vie en France? <https://theconversation.com/epidemie-de-covid-19-quel-impact-sur-lesperance-de-vie-en-france-141484>. Last used July 1, 2020.

<sup>17</sup> <https://github.com/statsccpr/ind-cov-mort>

1  
2  
3  
4  
5  
6  
7  
8  
9  
10  
11  
12  
13  
14  
15  
16  
17  
18  
19  
20  
21  
22  
23  
24  
25  
26  
27  
28  
29  
30  
31  
32  
33  
34  
35  
36  
37  
38  
39  
40  
41  
42  
43  
44  
45  
46  
47  
48  
49  
50  
51  
52  
53  
54  
55  
56  
57  
58  
59  
60

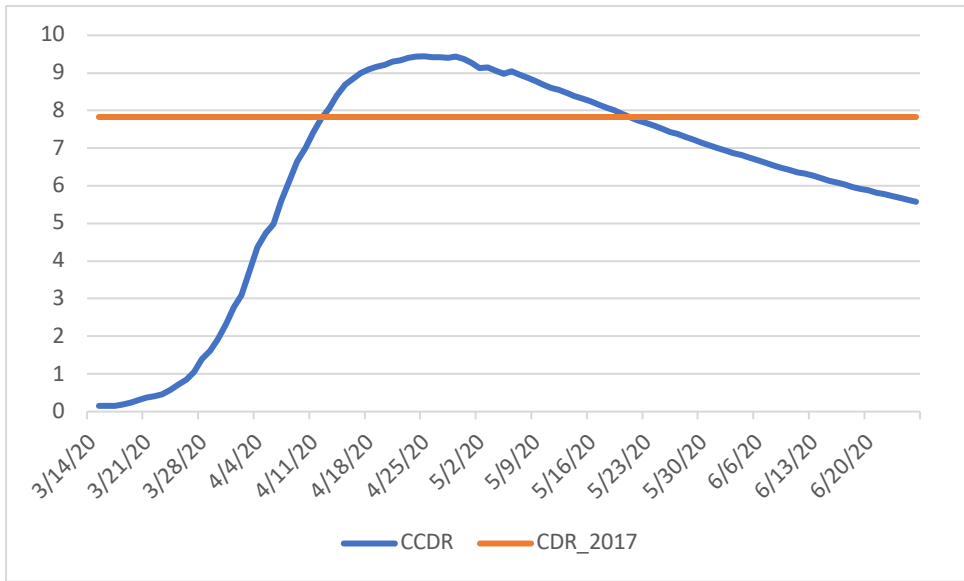

peer review only

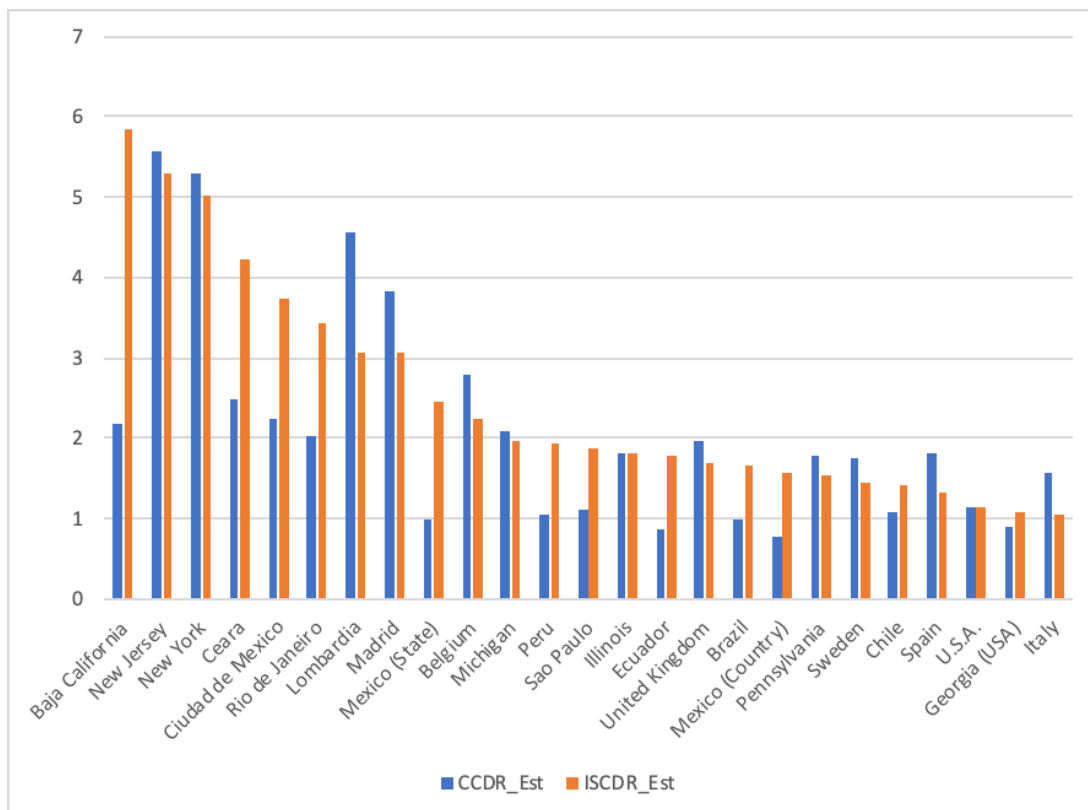

Review only

1  
2  
3  
4  
5  
6  
7  
8  
9  
10  
11  
12  
13  
14  
15  
16  
17  
18  
19  
20  
21  
22  
23  
24  
25  
26  
27  
28  
29  
30  
31  
32  
33  
34  
35  
36  
37  
38  
39  
40  
41  
42  
43  
44  
45  
46  
47  
48  
49  
50  
51  
52  
53  
54  
55  
56  
57  
58  
59  
60

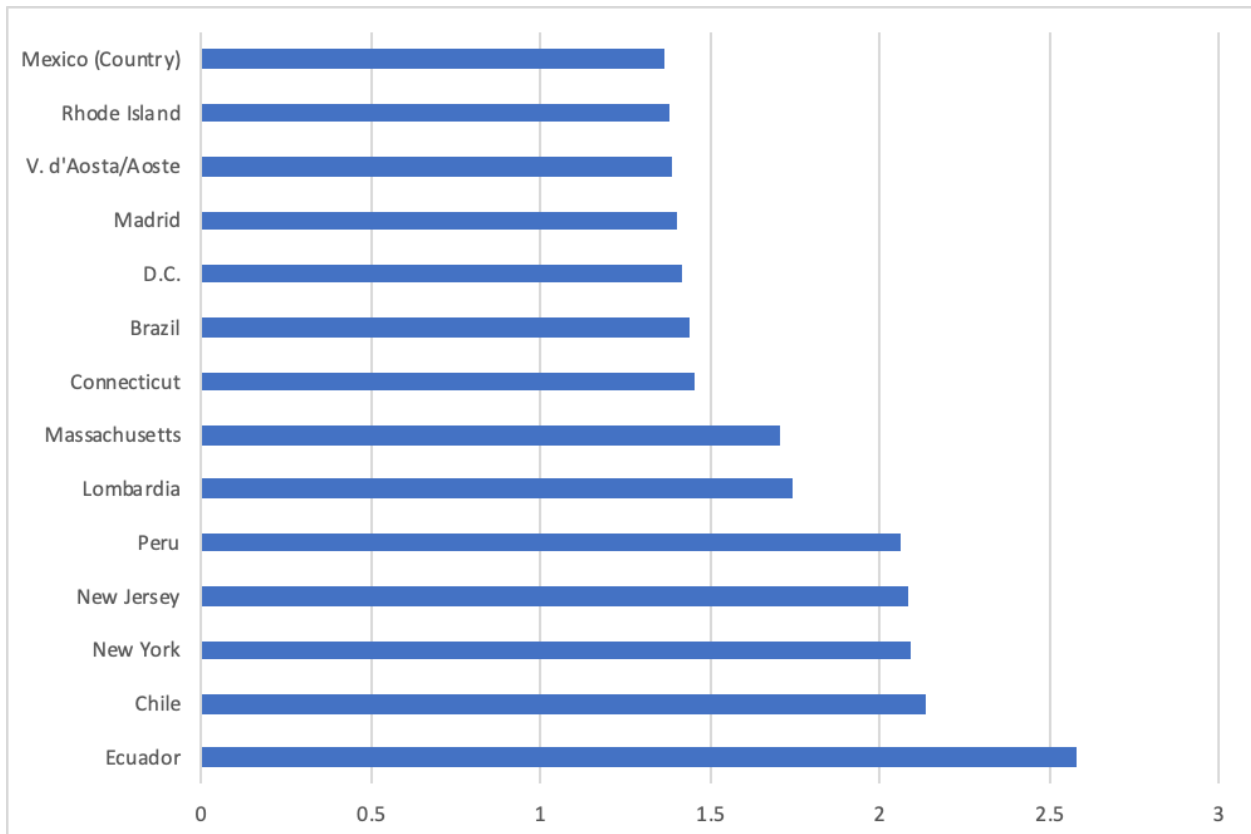

Review only

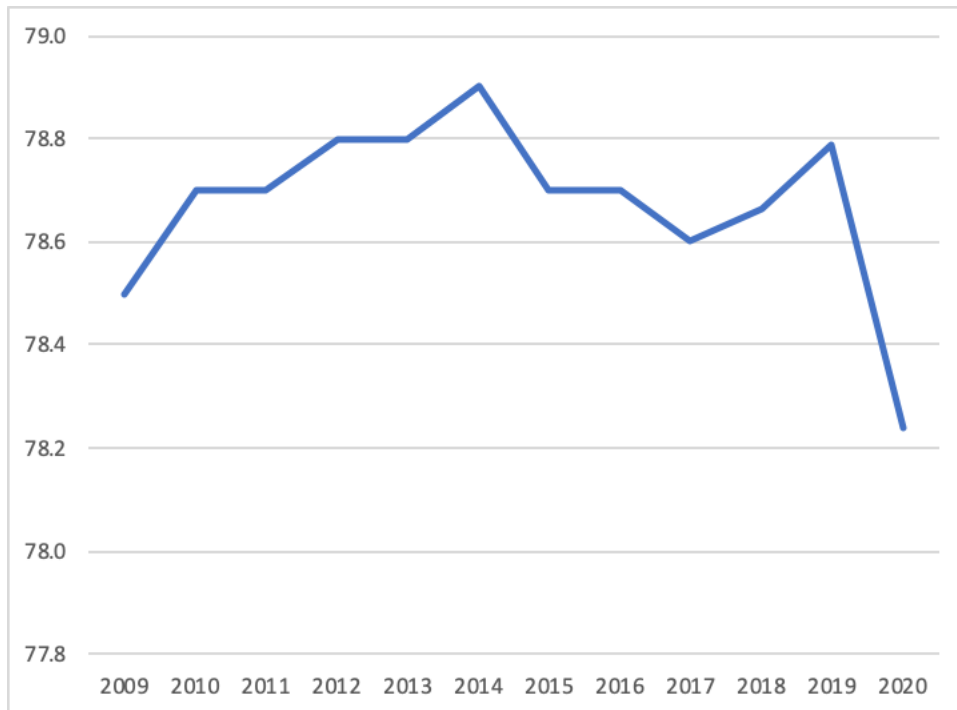

er review only

1  
2  
3  
4  
5  
6  
7  
8  
9  
10  
11  
12  
13  
14  
15  
16  
17  
18  
19  
20  
21  
22  
23  
24  
25  
26  
27  
28  
29  
30  
31  
32  
33  
34  
35  
36  
37  
38  
39  
40  
41  
42  
43  
44  
45  
46  
47  
48  
49  
50  
51  
52  
53  
54  
55  
56  
57  
58  
59  
60



1  
2  
3  
4  
5  
6  
7  
8  
9  
10  
11  
12  
13  
14  
15  
16  
17  
18  
19  
20  
21  
22  
23  
24  
25  
26  
27  
28  
29  
30  
31  
32  
33  
34  
35  
36  
37  
38  
39  
40  
41  
42  
43  
44  
45  
46  
47  
48  
49  
50  
51  
52  
53  
54  
55  
56  
57  
58  
59  
60

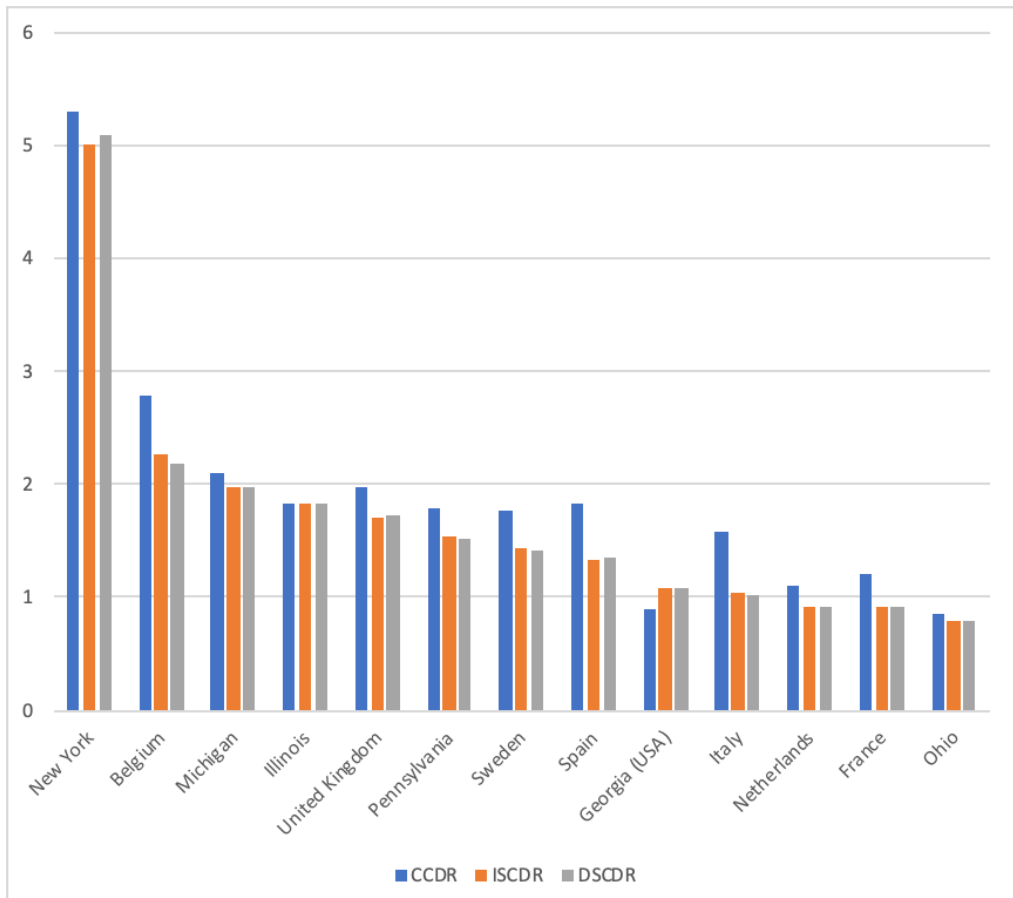

view only

## Beyond Deaths per Capita:

### Technical Appendix

Updated Version, 7/7/2020

Patrick Heuveline, Ph.D. and Michael Tzen, M.Sc.

California Center for Population Research (CCPR)

University of California, Los Angeles (UCLA)

#### Part A. Mortality Indicators

##### Section 1. Period Crude Covid-19 Death Rate (CCDR)

- 1.1 Get current estimate date & cumulative number of covid-19 deaths by UN country/territory, and first subnational administrative units in Brazil, China, Italy, Mexico, Spain and U.S. state with at least one reported case by June 1, 2020 (all locations thereafter) from: <https://coronavirus.jhu.edu/>
- 1.2 Get projection end date & projected number of covid-19 deaths by country & U.S. state from: <https://covid19.healthdata.org/>
- 1.3 Get date of first CoViD-19 case and first CoViD-19 death and total mid-2020 population size for all locations in (1.1) (see Part B for example)
- 1.4 Calculate exposure in person-years for all locations in (1.1) as:  
$$N.T$$
where  $N$  is total population size in (1.3) &  $T$  is year-to-date duration in year converted from dates in (1.1), (1.2) & (1.3)
- 1.5 Calculate the estimated period Crude Covid-19 Death Rate (CCDR) for all locations in (1.1) & projected CCDR for all locations in (1.2) as ratios of deaths in (1.1) & (1.2) to exposure in (1.4)

##### Section 2. Comparative Covid-19 Mortality Ratio (CCMR)

- 2.1 Get report date and number of registered covid-19 deaths by sex and age group from: <https://data.cdc.gov/NCHS/Provisional-COVID-19-Death-Counts-by-Sex-Age-and-S/9bhg-hcku>
- 2.2 Get the mid-2020 population size by age groups,  $nN_x$ , for each sex and the same age groups as in (2.1) for all locations in (1.1) (see part B for example)
- 2.3 Calculate age-and-sex-specific covid-19 death rates for the U.S.A. using the estimate date of first CoViD-19 death and estimated number of covid-19 deaths in the country in (1.1), the distribution of deaths by sex and age group in (2.1) and the mid-2020 population by sex and age group in the country in (2.2) as:

$${}_nD_x^C / {}_nN_x \cdot T$$

where (separately for males and females)  ${}_nN_x$  is the mid-2020 population in age group  $x$  to  $x+n$  in (2.2),  $T$  is the duration of exposure in (1.4) &  ${}_nD_x^C$  is the number of covid-19 deaths in (1.1) multiplied by the ratio of deaths in the age group to total deaths in (2.1)

- 2.4 Calculate estimated and projected counterfactual numbers of covid-19 deaths for all locations in (1.1) & (1.2) using the sex and age-specific covid-19 death rates for the U.S.A. in (2.3) and the mid-2020 population by sex and age group in (2.2)
- 2.5 Calculate the Comparative Covid-19 Mortality Ratio (CCMR) for estimated and projected numbers of covid-19 deaths for all locations in (1.1) & (1.2) as the ratio of the actual estimate in (1.1) or projected number in (1.2) to the corresponding counterfactual number in (2.4)

### Section 3. Projected Reduction in 2020-Life Expectancies

- 3.1 Get period life-table age-specific death rates ( ${}_nm_x$ ) and survival probabilities ( ${}_np_x$ ) for year-2020 for each country in (1.1) (see Part B for example)
- 3.2 Calculate the age-specific ratio of updated to previously projected deaths from all causes in 2020 for each country in (1.1) as:

$${}_nR_x = \frac{{}_nm_x \cdot \left( {}_nN_x - \left( (1 - \bar{t}_m) \cdot {}_nD_x^C \right) \right) + {}_nD_x^C}{{}_nm_x \cdot {}_nN_x}$$

where  ${}_nm_x$  is the age-specific death rate in the previously projected year-2020 life table from (3.1),  ${}_nN_x$  is the mid-2020 population by age group from (2.2),  ${}_nD_x^C$  is the projected number of covid-19 deaths in the age group obtained by multiplying the total for the Country in (1.2) by the ratio of deaths in the age group to total deaths in the U.S.A. in (2.1) &  $\bar{t}_m$  is the fraction of a year corresponding to the average time of covid-19 deaths estimated here as the mid-point between the first CoViD-19 death in the country and the end date of the projection (October 1, 2020 as of this writing)

- 3.3 Calculate age-specific survival probabilities in the new projected year-2020 life table for each country in (1.1) from (3.1) & (3.2) using Chiang (1968) formula:

$${}^*np_x = {}_np_x \cdot {}_nR_x$$

- 3.4 Calculate the age-specific number of years lived after age  $x$  for individuals dying in the age interval in the new projected year-2020 life table for each country in (1.1) from its corresponding value in the previously projected year-2020 life table derived from (3.1) and the life table relationship:

$${}_na_x = \frac{1}{{}_nm_x} - n \cdot \frac{{}_np_x}{1 - {}_np_x}$$

& from (3.2) and (3.3) using the Preston et al. (2001: 84) formula:

$${}^*a_x = n + \left( {}_nR_x \cdot \frac{{}_nq_x}{{}^*q_x} \cdot ({}_na_x - n) \right)$$

and

$${}^*a_{85+} = \frac{a_{85+}}{R_{85+}}$$

3.5 Calculate new values of life expectancies ( $e_x^o$  values) in the year-2020 life table for all locations in (1.2) starting with  $e_x^o = a_{85+}$  in (3.4) and then using values in (3.3) & (3.4) with the life table relationship:

$$e_x^o = {}_n p_x \cdot (e_{x+n}^o + n) + {}_n a_x \cdot (1 - {}_n p_x)$$

3.6 Calculate the difference between the new values of life expectancies in year-2020 life table in (3.5) and the original values derived from values in (3.1) for all locations in (1.2) and the life table relationship:

$$e_x^o = ({}_n p_x \cdot e_{x+n}^o) + \frac{1}{{}_n m_x} \cdot (1 - {}_n p_x)$$

## Part B. Demographic Parameters

### Section 1. Mid-2020 Population Size

1.1 (Step 1.3 in part A) Total mid-2020 population size for each UN country and territory was obtained from the "Total Population" file at:

<https://population.un.org/wpp/Download/Standard/Population/>

1.1.a For provinces in China, population size was multiplied by the ratio of the 2019-year-end total population estimates for the province divided by the corresponding estimates for the country obtained at:

<http://data.stats.gov.cn>

1.1.b For U.S. states, the size of each age group was multiplied by the ratio of the 2018-age-group sizes estimated for the state divided by the corresponding estimate for the country obtained at:

<https://data.census.gov/cedsci/table?q=United%20States&g=0100000US&tid=ACSDP1Y2018.DP05&hidePreview=true&table=DP05>

1.1.c For Brazilian states, population size was multiplied by the ratio of the 2019-year-end total population estimates for the state divided by the corresponding estimates for the country obtained from the Brazil Statistical Office (IBGE) at:

<https://www.ibge.gov.br/en/cities-and-states.html?view=municipio>

1.1.d For Italian regions, the size of each age group was multiplied by the ratio of the 2019-age-group sizes estimated for the region divided by the corresponding estimate for the country obtained from IStat at:

<http://demo.istat.it/tvm2016/index.php>

1.1.e For Spanish autonomous communities, the size of each age group was multiplied by the ratio of the 2019-age-group sizes estimated for the community divided by the corresponding estimate for the country obtained from Instituto Nacional Estadística (INE) at:

[https://www.ine.es/dyngs/INEbase/en/categoria.htm?c=Estadistica\\_P&cid=1254734710984](https://www.ine.es/dyngs/INEbase/en/categoria.htm?c=Estadistica_P&cid=1254734710984)

1.1.f For Mexican states, the size of each age group was multiplied by the ratio of the 2010-age-group sizes estimated for the state divided by the corresponding estimate for the country obtained from Instituto Nacional de Estadística y Geografía (INEGI) at:

<https://en.www.inegi.org.mx/temas/estructura/default.html#Tabulados>

1.2 (Step 1.3 in part A) Dates of first CoViD-19 case and death for UN countries and territories and for provinces in China were retrieved from the World Health Organization's daily situation reports at <https://www.who.int/emergencies/diseases/novel-coronavirus-2019/situation-reports/>

1.2.a. For other sub-national populations, dates were obtained from the Institute for Health Metrics and Evaluation at <https://covid19.healthdata.org>.

1.3 (step 2.2. in part A) For UN countries and territories with a population size over 90,000, mid-2020 population size by age group was obtained from the "Population by Age and Sex" file at: <https://population.un.org/wpp/Download/Standard/Population/> with the following adjustments:

1.3.a Number of infants (under age 1) for each of these UN countries and territories was obtained from the "Annual Population by Age – Both Sexes" file at: <https://population.un.org/wpp/Download/Standard/Interpolated/>

1.3.b Number in age group 1-4 for each of these UN countries and territories was obtained as the difference between the number in the first age group (age 0-4) in the population by 5-year age groups in (1.3) above & the number of infants in (1.3.a) above

1.3.c Numbers in age groups 5-14 to 75-84 for each of these UN countries and territories were obtained by adding the numbers in two consecutive age groups (e.g., ages 5-14 & ages 15-24) in the population by 5-year age groups in (1.3) above

1.3.d Number in age group 85 and over for each of these UN countries and territories was obtained by adding the numbers in the last four age groups (i.e., ages 85-89, 90-94, 95-99 & 100+) in the population by 5-year age groups in (1.3) above

1.3.e For sub-national populations, population size in each group was multiplied by the ratio of the UN mid-2020 estimates for the country to total population estimates for country from (1.1) above

## Section 2. Calendar-Year-2020 Period Life Table Values

2.1 (Step 3.1 in part A) The period life-table age-specific survival probabilities ( ${}_n p_x$ ) for year-2020 for each country in (1.3) above are obtained from the corresponding values in the estimated 2015-20 & projected 2020-25 life tables in the "Life table survivors ( $l_x$ ) at exact age  $x$  - Both Sexes" file at:

<https://population.un.org/wpp/Download/Standard/Mortality/>

2.1.a Age-specific survival probabilities ( ${}_n p_x$ ) in the estimated 2015-20 & projected 2020-25 life tables for each country in (1.3) above are obtained from the number of survivors by age ( $l_x$ ) and the life table relationship:

$${}_n p_x = \frac{l_{x+n}}{l_x}$$

2.1.b Period life-table age-specific survival probabilities ( ${}_n p_x$ ) for year-2020 for each country in (1.3) above are obtained as:

$${}_n p_x[2020] = \sqrt{{}_n p_x[2015 - 2020] \cdot {}_n p_x[2020 - 2025]}$$

2.2 (step 3.1 in part A) The period life-table age-specific death rates ( ${}_n m_x$ ) for year-2020 for each country in (1.3) above are obtained from the corresponding values in the estimated 2015-20

& projected 2020-25 life tables in the “Life table survivors  $l(x)$  at exact age  $x$ ” & “life expectancy at exact age  $x$ ” files at:

<https://population.un.org/wpp/Download/Standard/Mortality/>

- 2.2.a Age-specific death rates ( ${}_n m_x$ ) in the estimated 2015-20 & projected 2020-25 life tables for each country in (1.3) above are obtained the male/female number of survivors by age ( $l_x$ ) & the male/female life expectancy by age ( $e_x^o$ ) and the life table relationships:

$${}_n m_x = \frac{l_x - l_{x+n}}{(l_x \cdot e_x^o) - (l_{x+n} \cdot e_{x+n}^o)}$$

&

$$m_{x+} = \frac{1}{e_x^o}$$

- 2.2.b Period life-table male/female age-specific death rates ( ${}_n m_x$ ) and survival probabilities ( ${}_n p_x$ ) for year-2020 for each country in (1.3) above are obtained as:

$${}_n m_x[2020] = ({}_n m_x[2015-20] + {}_n m_x[2020-25]) / 2$$

- 2.2.c For U.S. states, age-specific death rates ( ${}_n m_x$ ) for 2016 at ages above age 25 were obtained from: <https://wonder.cdc.gov/controller/datarequest/D140>. Under age 25, age-specific death rates are unreliable in some states and the rates in all states were thus assumed to equal the rate at the same age in the country (the assumption should have negligible impact on CoViD-19 mortality assessments). The 2016 age-specific death rates for each sex, age group and state were thus prorated using the ratio of 2020/2016 age-specific death rate for the same sex and age group in the country.
- 2.2.d For Italian regions and Spanish autonomous communities, 2018 (Italy) and 2019 (Spain) life tables were obtained from IStat and INE (see 1.1 above). The 2018 (or 2019) age-specific death rates for each sex, age group and region/community were prorated using the ratio of 2020/2018 (or 2019) age-specific death rate for the same sex and age group in the country. The 2020 life tables were then completed assuming no change in the  ${}_n a_x$  from 2018 (or 2019)

|    | LocID | Location        | Loc_type   | Mid_2020_pop | PopDensity | CDR_year |
|----|-------|-----------------|------------|--------------|------------|----------|
| 1  |       |                 |            |              |            |          |
| 2  |       |                 |            |              |            |          |
| 3  |       |                 |            |              |            |          |
| 4  |       |                 |            |              |            |          |
| 5  | MX02  | Baja California | Mexico     | 3,605.789    | 50.5       | 4.88     |
| 6  | MX23  | Quintana Roo    | Mexico     | 1,497.403    | 33.4       | 3.35     |
| 7  | US34  | New Jersey      | U.S.A.     | 9,008.043    | 468.8      | 8.31     |
| 8  | US36  | New York        | U.S.A.     | 19,779.540   | 161.7      | 7.83     |
| 9  |       |                 |            |              |            |          |
| 10 | BR23  | Ceara           | Brazil     | 9,236.905    | 62.0       | NA       |
| 11 | BR13  | Amazonas        | Brazil     | 4,192.173    | 2.7        | NA       |
| 12 | BR14  | Roraima         | Brazil     | 612.715      | 2.7        | NA       |
| 13 |       |                 |            |              |            |          |
| 14 | MX27  | Tabasco         | Mexico     | 2,555.914    | 103.3      | 4.98     |
| 15 | US25  | Massachusetts   | U.S.A.     | 6,985.561    | 344.1      | 8.57     |
| 16 | BR15  | Para            | Brazil     | 8,701.617    | 7.0        | NA       |
| 17 |       |                 |            |              |            |          |
| 18 | MX09  | Ciudad de Me    | Mexico     | 10,298.920   | 6,888.8    | 6.23     |
| 19 | US09  | Connecticut     | U.S.A.     | 3,613.794    | 288.0      | 8.73     |
| 20 | US11  | District of Col | U.S.A.     | 712.330      | 4,477.2    | 7.15     |
| 21 |       |                 |            |              |            |          |
| 22 | BR33  | Rio de Janeiro  | Brazil     | 17,463.128   | 399.2      | NA       |
| 23 | BR16  | Amapa           | Brazil     | 855.439      | 6.0        | NA       |
| 24 | ES08  | Castilla-La Ma  | Spain      | 2,021.012    | 25.4       | 9.54     |
| 25 |       |                 |            |              |            |          |
| 26 | MX25  | Sinaloa         | Mexico     | 3,215.596    | 56.0       | 5.59     |
| 27 | BR26  | Pernambuco      | Brazil     | 9,666.777    | 98.6       | NA       |
| 28 | IT03  | Lombardia       | Italy      | 10,073.686   | 422,224.8  | 9.90     |
| 29 | ES13  | Madrid (Comu    | Spain      | 6,611.809    | 823.6      | 7.06     |
| 30 | BR12  | Acre            | Brazil     | 892.059      | 5.4        | NA       |
| 31 | US44  | Rhode Island    | U.S.A.     | 1,070.329    | 395.5      | 9.59     |
| 32 | BR32  | Espirito Santo  | Brazil     | 4,064.780    | 88.2       | NA       |
| 33 | US22  | Louisiana       | U.S.A.     | 4,713.234    | 41.8       | 9.78     |
| 34 |       |                 |            |              |            |          |
| 35 | MX15  | Mexico (State   | Mexico     | 17,378.187   | 777.5      | 4.50     |
| 36 | MX29  | Tlaxcala        | Mexico     | 1,345.008    | 336.5      | 4.73     |
| 37 |       |                 |            |              |            |          |
| 38 | IT02  | Valle d'Aosta   | Italy      | 125.953      | 38,701.3   | 11.70    |
| 39 | ES17  | Rioja, La       | Spain      | 315.741      | 62.6       | 10.00    |
| 40 | MX17  | Morelos         | Mexico     | 2,047.959    | 419.8      | 5.49     |
| 41 | BEL   | Belgium         | Cntry/Terr | 11,589.616   | 382.7      | 9.78     |
| 42 | MX26  | Sonora          | Mexico     | 3,077.474    | 17.1       | 5.60     |
| 43 | BR11  | Rondonia        | Brazil     | 1,797.626    | 7.6        | NA       |
| 44 | BR27  | Alagoas         | Brazil     | 3,375.667    | 121.2      | NA       |
| 45 | MX04  | Campeche        | Mexico     | 945.785      | 16.4       | 4.64     |
| 46 |       |                 |            |              |            |          |
| 47 | BR28  | Sergipe         | Brazil     | 2,325.083    | 106.0      | NA       |
| 48 | BR24  | Rio Grande do   | Brazil     | 3,547.108    | 67.2       | NA       |
| 49 | US26  | Michigan        | U.S.A.     | 10,114.528   | 68.7       | 9.80     |
| 50 | PER   | Peru            | Cntry/Terr | 32,971.846   | 25.8       | 5.67     |
| 51 | ES07  | Castilla y Leon | Spain      | 2,401.521    | 25.5       | 11.91    |
| 52 | BR21  | Maranhao        | Brazil     | 7,156.397    | 21.7       | NA       |
| 53 | US24  | Maryland        | U.S.A.     | 6,109.605    | 241.3      | 8.25     |
| 54 |       |                 |            |              |            |          |
| 55 | BR35  | Sao Paulo       | Brazil     | 46,446.155   | 187.1      | NA       |
| 56 |       |                 |            |              |            |          |
| 57 |       |                 |            |              |            |          |
| 58 |       |                 |            |              |            |          |
| 59 |       |                 |            |              |            |          |
| 60 |       |                 |            |              |            |          |

|    |      |                 |            |             |           |       |
|----|------|-----------------|------------|-------------|-----------|-------|
| 1  |      |                 |            |             |           |       |
| 2  |      |                 |            |             |           |       |
| 3  | ES15 | Navarra (C. Fo  | Spain      | 651.019     | 62.7      | 8.51  |
| 4  | US17 | Illinois        | U.S.A.     | 12,887.403  | 89.5      | 8.57  |
| 5  | ECU  | Ecuador         | Cntry/Terr | 17,643.060  | 71.0      | 5.15  |
| 6  | MX12 | Guerrero        | Mexico     | 3,882.954   | 61.1      | 4.86  |
| 7  | MYT  | Mayotte         | Cntry/Terr | 272.813     | 727.5     | 2.75  |
| 8  | US10 | Delaware        | U.S.A.     | 979.254     | 193.4     | 9.54  |
| 9  | ES09 | Catalunia       | Spain      | 7,623.414   | 237.4     | 8.41  |
| 10 | GBR  | United Kingdo   | Cntry/Terr | 67,886.004  | 280.6     | 9.42  |
| 11 | BR25 | Paraiba         | Brazil     | 4,064.251   | 72.0 NA   |       |
| 12 | IT01 | Piemonte        | Italy      | 4,369.052   | 172,347.8 | 12.30 |
| 13 | BRA  | Brazil          | Cntry/Terr | 212,559.409 | 25.4      | 6.63  |
| 14 | MX08 | Chihuahua       | Mexico     | 3,832.828   | 15.5      | 7.58  |
| 15 | IT08 | Emilia-Romagn   | Italy      | 4,468.697   | 164,493.2 | 11.20 |
| 16 | MX13 | Hidalgo         | Mexico     | 3,072.136   | 147.6     | 4.87  |
| 17 | STP  | Sao Tome and    | Cntry/Terr | 219.161     | 228.3     | 4.74  |
| 18 | MX21 | Puebla          | Mexico     | 6,612.709   | 192.8     | 5.37  |
| 19 | IT22 | Trento (Provin  | Italy      | 541.866     | 87,334.4  | 9.30  |
| 20 | MEX  | Mexico (Coun    | Cntry/Terr | 128,932.753 | 66.3      | 6.14  |
| 21 | MX31 | Yucatan         | Mexico     | 2,269.237   | 57.4      | 5.71  |
| 22 | US42 | Pennsylvania    | U.S.A.     | 12,966.170  | 111.7     | 10.59 |
| 23 | IT07 | Liguria         | Italy      | 1,557.702   | 192,215.6 | 14.30 |
| 24 | BR22 | Piaui           | Brazil     | 3,310.800   | 13.2 NA   |       |
| 25 | SWE  | Sweden          | Cntry/Terr | 10,099.270  | 24.6      | 9.14  |
| 26 | CHL  | Chile           | Cntry/Terr | 19,116.209  | 25.7      | 6.36  |
| 27 | US28 | Mississippi     | U.S.A.     | 3,019.798   | 24.9      | 10.82 |
| 28 | US18 | Indiana         | U.S.A.     | 6,767.587   | 72.8      | 9.84  |
| 29 | ESP  | Spain           | Cntry/Terr | 46,754.783  | 93.7      | 9.26  |
| 30 | ES02 | Aragon          | Spain      | 1,315.017   | 27.6      | 10.26 |
| 31 | BR53 | Distrito Feder  | Brazil     | 3,049.880   | 529.4 NA  |       |
| 32 | IT21 | Bolzano (Provi  | Italy      | 531.191     | 71,779.7  | 8.30  |
| 33 | IRL  | Ireland         | Cntry/Terr | 4,937.796   | 71.7      | 6.27  |
| 34 | BR51 | Mato Grosso     | Brazil     | 3,524.464   | 3.9 NA    |       |
| 35 | MX22 | Queretaro       | Mexico     | 2,094.397   | 179.0     | 4.36  |
| 36 | MX30 | Veracruz        | Mexico     | 8,831.401   | 122.9     | 5.90  |
| 37 | MX18 | Nayarit         | Mexico     | 1,255.449   | 45.1      | 5.47  |
| 38 | MX01 | Aguascaliente   | Mexico     | 1,360.852   | 242.3     | 4.37  |
| 39 | MX07 | Chiapas         | Mexico     | 5,412.679   | 73.8      | 4.53  |
| 40 | US08 | Colorado        | U.S.A.     | 5,762.204   | 21.4      | 6.79  |
| 41 | USA  | United States   | Cntry/Terr | 331,002.647 | 36.2      | 8.93  |
| 42 | MX03 | Baja California | Mexico     | 727.007     | 9.8       | 3.82  |
| 43 | IT11 | Marche          | Italy      | 1,529.183   | 162,674.8 | 11.20 |
| 44 | US13 | Georgia (USA)   | U.S.A.     | 10,628.510  | 70.9      | 7.97  |
| 45 | GNQ  | Equatorial Gui  | Cntry/Terr | 1,402.985   | 50.0      | 8.94  |
| 46 |      |                 |            |             |           |       |
| 47 |      |                 |            |             |           |       |
| 48 |      |                 |            |             |           |       |
| 49 |      |                 |            |             |           |       |
| 50 |      |                 |            |             |           |       |
| 51 |      |                 |            |             |           |       |
| 52 |      |                 |            |             |           |       |
| 53 |      |                 |            |             |           |       |
| 54 |      |                 |            |             |           |       |
| 55 |      |                 |            |             |           |       |
| 56 |      |                 |            |             |           |       |
| 57 |      |                 |            |             |           |       |
| 58 |      |                 |            |             |           |       |
| 59 |      |                 |            |             |           |       |
| 60 |      |                 |            |             |           |       |



|    |      |                  |            |            |           |       |
|----|------|------------------|------------|------------|-----------|-------|
| 1  |      |                  |            |            |           |       |
| 2  |      |                  |            |            |           |       |
| 3  | KWT  | Kuwait           | Cntry/Terr | 4,270.563  | 239.7     | 2.97  |
| 4  | ITA  | Italy            | Cntry/Terr | 60,461.828 | 205.6     | 10.70 |
| 5  | BR17 | Tocantins        | Brazil     | 1,590.921  | 5.7 NA    |       |
| 6  | ES11 | Extremadura      | Spain      | 1,063.076  | 25.5      | 10.56 |
| 7  | MX06 | Colima           | Mexico     | 749.741    | 133.2     | 4.95  |
| 8  | US33 | New Hampshi      | U.S.A.     | 1,372.567  | 59.1      | 9.31  |
| 9  | US27 | Minnesota        | U.S.A.     | 5,677.124  | 27.5      | 9.96  |
| 10 | NLD  | Netherlands      | Cntry/Terr | 17,134.873 | 508.2     | 8.96  |
| 11 | MX28 | Tamaulipas       | Mexico     | 3,689.743  | 45.9      | 5.26  |
| 12 | FRA  | France           | Cntry/Terr | 65,273.512 | 119.2     | 9.39  |
| 13 | MX20 | Oaxaca           | Mexico     | 4,386.373  | 46.8      | 5.71  |
| 14 | CHI  | Channel Islanc   | Cntry/Terr | 173.859    | 915.0     | 7.89  |
| 15 | BOL  | Bolivia (Plurini | Cntry/Terr | 11,673.029 | 10.8      | 6.79  |
| 16 | US35 | New Mexico       | U.S.A.     | 2,121.624  | 6.7       | 8.94  |
| 17 | PAN  | Panama           | Cntry/Terr | 4,314.768  | 58.0      | 5.16  |
| 18 | IRN  | Iran (Islamic R  | Cntry/Terr | 83,992.953 | 51.6      | 4.85  |
| 19 | BR29 | Bahia            | Brazil     | 15,043.792 | 26.6 NA   |       |
| 20 | US04 | Arizona          | U.S.A.     | 7,262.286  | 24.7      | 8.23  |
| 21 | ARM  | Armenia          | Cntry/Terr | 2,963.234  | 104.1     | 9.80  |
| 22 | ES06 | Cantabria        | Spain      | 579.733    | 109.0     | 10.33 |
| 23 | US39 | Ohio             | U.S.A.     | 11,827.215 | 111.5     | 10.61 |
| 24 | DJI  | Djibouti         | Cntry/Terr | 988.002    | 42.6      | 7.05  |
| 25 | US51 | Virginia         | U.S.A.     | 8,614.990  | 84.0      | 8.10  |
| 26 | GUF  | French Guiana    | Cntry/Terr | 298.682    | 3.6       | 3.00  |
| 27 | IT05 | Veneto           | Italy      | 4,914.725  | 267,218.0 | 10.00 |
| 28 | US19 | Iowa             | U.S.A.     | 3,194.037  | 22.1      | 9.71  |
| 29 | IRQ  | Iraq             | Cntry/Terr | 40,222.503 | 92.6      | 4.74  |
| 30 | US01 | Alabama          | U.S.A.     | 4,944.686  | 37.6      | 10.92 |
| 31 | MKD  | North Macedo     | Cntry/Terr | 2,083.380  | 82.6      | 10.25 |
| 32 | MDA  | Republic of M    | Cntry/Terr | 4,033.963  | 122.8     | 11.81 |
| 33 | BHR  | Bahrain          | Cntry/Terr | 1,701.583  | 2,238.9   | 2.47  |
| 34 | IT13 | Abruzzo          | Italy      | 1,314.662  | 121,463.4 | 11.20 |
| 35 | ES10 | Comunitat Val    | Spain      | 4,976.319  | 214.0     | 8.81  |
| 36 | CAN  | Canada           | Cntry/Terr | 37,742.157 | 4.2       | 7.83  |
| 37 | HND  | Honduras         | Cntry/Terr | 9,904.608  | 88.5      | 4.48  |
| 38 | US32 | Nevada           | U.S.A.     | 3,070.509  | 10.8      | 8.22  |
| 39 | QAT  | Qatar            | Cntry/Terr | 2,881.060  | 248.2     | 1.32  |
| 40 | MX05 | Coahuila         | Mexico     | 3,150.456  | 20.7      | 5.31  |
| 41 | MX14 | Jalisco          | Mexico     | 8,442.704  | 107.4     | 5.33  |
| 42 | MX16 | Michoacan        | Mexico     | 4,992.690  | 85.1      | 5.55  |
| 43 | SAU  | Saudi Arabia     | Cntry/Terr | 34,813.867 | 16.2      | 3.58  |
| 44 | LUX  | Luxembourg       | Cntry/Terr | 625.976    | 241.7     | 7.11  |
| 45 | MX19 | Nuevo Leon       | Mexico     | 5,360.737  | 83.5      | 4.97  |
| 46 |      |                  |            |            |           |       |
| 47 |      |                  |            |            |           |       |
| 48 |      |                  |            |            |           |       |
| 49 |      |                  |            |            |           |       |
| 50 |      |                  |            |            |           |       |
| 51 |      |                  |            |            |           |       |
| 52 |      |                  |            |            |           |       |
| 53 |      |                  |            |            |           |       |
| 54 |      |                  |            |            |           |       |
| 55 |      |                  |            |            |           |       |
| 56 |      |                  |            |            |           |       |
| 57 |      |                  |            |            |           |       |
| 58 |      |                  |            |            |           |       |
| 59 |      |                  |            |            |           |       |
| 60 |      |                  |            |            |           |       |

|    |      |                 |            |            |           |       |
|----|------|-----------------|------------|------------|-----------|-------|
| 1  |      |                 |            |            |           |       |
| 2  |      |                 |            |            |           |       |
| 3  | ES04 | Balears (Illes) | Spain      | 1,137.723  | 227.9     | 6.70  |
| 4  | OMN  | Oman            | Cntry/Terr | 5,106.622  | 16.5      | 2.45  |
| 5  | MX10 | Durango         | Mexico     | 1,858.666  | 15.0      | 5.65  |
| 6  | ES03 | Asturias (Princ | Spain      | 1,024.060  | 96.6      | 12.64 |
| 7  | CHE  | Switzerland     | Cntry/Terr | 8,654.618  | 219.0     | 8.11  |
| 8  | US29 | Missouri        | U.S.A.     | 6,200.300  | 34.7      | 10.12 |
| 9  | ZAF  | South Africa    | Cntry/Terr | 59,308.690 | 48.9      | 9.45  |
| 10 | IT09 | Toscana         | Italy      | 3,740.109  | 295,717.2 | 11.60 |
| 11 | US06 | California      | U.S.A.     | 40,011.015 | 99.0      | 6.78  |
| 12 | MX11 | Guanajuato      | Mexico     | 6,295.742  | 205.6     | 4.95  |
| 13 | MRT  | Mauritania      | Cntry/Terr | 4,649.660  | 4.5       | 7.06  |
| 14 | US31 | Nebraska        | U.S.A.     | 1,952.141  | 9.8       | 8.79  |
| 15 | US53 | Washington      | U.S.A.     | 7,627.572  | 44.2      | 7.70  |
| 16 | US45 | South Carolina  | U.S.A.     | 5,145.408  | 66.0      | 9.84  |
| 17 | IT06 | Friuli-Venezia  | Italy      | 1,218.962  | 155,147.8 | 11.90 |
| 18 | ARE  | United Arab Em  | Cntry/Terr | 9,890.400  | 118.3     | 1.62  |
| 19 | US37 | North Carolina  | U.S.A.     | 10,501.123 | 83.2      | 9.07  |
| 20 | CAF  | Central Africa  | Cntry/Terr | 4,829.764  | 7.8       | 11.86 |
| 21 | BR52 | Goias           | Brazil     | 7,098.918  | 20.9 NA   |       |
| 22 | DOM  | Dominican Re    | Cntry/Terr | 10,847.904 | 224.5     | 6.25  |
| 23 | GTM  | Guatemala       | Cntry/Terr | 17,915.567 | 167.2     | 4.72  |
| 24 | ES01 | Andalucia       | Spain      | 8,349.380  | 95.3      | 8.33  |
| 25 | US21 | Kentucky        | U.S.A.     | 4,519.893  | 43.9      | 10.82 |
| 26 | COL  | Colombia        | Cntry/Terr | 50,882.884 | 45.9      | 5.73  |
| 27 | US55 | Wisconsin       | U.S.A.     | 5,882.866  | 41.8      | 9.09  |
| 28 | US12 | Florida         | U.S.A.     | 21,586.295 | 154.3     | 9.70  |
| 29 | AFG  | Afghanistan     | Cntry/Terr | 38,928.341 | 59.6      | 6.21  |
| 30 | ES12 | Galicia         | Spain      | 2,697.559  | 91.2      | 11.57 |
| 31 | US46 | South Dakota    | U.S.A.     | 893.132    | 4.5       | 9.19  |
| 32 | MX32 | Zacatecas       | Mexico     | 1,713.503  | 22.8      | 5.62  |
| 33 | TUR  | Turkey          | Cntry/Terr | 84,339.067 | 109.6     | 5.51  |
| 34 | BR41 | Parana          | Brazil     | 11,565.208 | 58.0 NA   |       |
| 35 | US38 | North Dakota    | U.S.A.     | 769.967    | 4.3       | 8.49  |
| 36 | GNB  | Guinea-Bissau   | Cntry/Terr | 1,967.998  | 70.0      | 9.32  |
| 37 | US48 | Texas           | U.S.A.     | 28,999.321 | 42.7      | 7.00  |
| 38 | PRT  | Portugal        | Cntry/Terr | 10,196.707 | 111.3     | 10.87 |
| 39 | US40 | Oklahoma        | U.S.A.     | 3,989.492  | 22.4      | 10.29 |
| 40 | MDV  | Maldives        | Cntry/Terr | 540.542    | 1,801.8   | 2.79  |
| 41 | MX24 | San Luis Potos  | Mexico     | 2,972.710  | 48.6      | 5.14  |
| 42 | BR43 | Rio Grande do   | Brazil     | 11,507.839 | 40.9 NA   |       |
| 43 | US20 | Kansas          | U.S.A.     | 2,945.539  | 13.9      | 9.29  |
| 44 | US47 | Tennessee       | U.S.A.     | 6,847.752  | 64.1      | 10.44 |
| 45 | YEM  | Yemen           | Cntry/Terr | 29,825.968 | 56.5      | 5.97  |
| 46 |      |                 |            |            |           |       |
| 47 |      |                 |            |            |           |       |
| 48 |      |                 |            |            |           |       |
| 49 |      |                 |            |            |           |       |
| 50 |      |                 |            |            |           |       |
| 51 |      |                 |            |            |           |       |
| 52 |      |                 |            |            |           |       |
| 53 |      |                 |            |            |           |       |
| 54 |      |                 |            |            |           |       |
| 55 |      |                 |            |            |           |       |
| 56 |      |                 |            |            |           |       |
| 57 |      |                 |            |            |           |       |
| 58 |      |                 |            |            |           |       |
| 59 |      |                 |            |            |           |       |
| 60 |      |                 |            |            |           |       |

|    |      |                |            |             |           |       |
|----|------|----------------|------------|-------------|-----------|-------|
| 1  |      |                |            |             |           |       |
| 2  |      |                |            |             |           |       |
| 3  | US05 | Arkansas       | U.S.A.     | 3,049.575   | 22.6      | 10.85 |
| 4  | BR31 | Minas Gerais   | Brazil     | 21,411.788  | 36.5      | NA    |
| 5  | ES14 | Murcia (Regio  | Spain      | 1,479.460   | 130.8     | 7.65  |
| 6  | BR42 | Santa Catarina | Brazil     | 7,247.033   | 75.7      | NA    |
| 7  | IT12 | Lazio          | Italy      | 5,885.980   | 341,707.9 | 9.70  |
| 8  | US49 | Utah           | U.S.A.     | 3,194.497   | 15.0      | 5.81  |
| 9  | DNK  | Denmark        | Cntry/Terr | 5,792.203   | 136.5     | 9.88  |
| 10 | EGY  | Egypt          | Cntry/Terr | 102,334.403 | 102.8     | 5.77  |
| 11 | CPV  | Cabo Verde     | Cntry/Terr | 555.988     | 138.0     | 5.56  |
| 12 | ROU  | Romania        | Cntry/Terr | 19,237.682  | 83.6      | 13.21 |
| 13 | IT16 | Puglia         | Italy      | 4,034.220   | 206,586.8 | 9.60  |
| 14 | GAB  | Gabon          | Cntry/Terr | 2,225.728   | 8.6       | 6.69  |
| 15 | RUS  | Russian Feder  | Cntry/Terr | 145,934.460 | 8.9       | 12.89 |
| 16 | US50 | Vermont        | U.S.A.     | 634.325     | 26.5      | 9.63  |
| 17 | PAK  | Pakistan       | Cntry/Terr | 220,892.331 | 286.5     | 6.86  |
| 18 | CMR  | Cameroon       | Cntry/Terr | 26,545.864  | 56.2      | 8.95  |
| 19 | DEU  | Germany        | Cntry/Terr | 83,783.945  | 240.4     | 11.45 |
| 20 | COM  | Comoros        | Cntry/Terr | 869.595     | 467.3     | 7.09  |
| 21 | CN17 | Hubei          | China      | 60,772.884  | 326.9     | 7.00  |
| 22 | ES05 | Canarias       | Spain      | 2,136.113   | 286.8     | 7.05  |
| 23 | BHS  | Bahamas        | Cntry/Terr | 393.248     | 39.3      | 6.97  |
| 24 | US23 | Maine          | U.S.A.     | 1,355.887   | 17.0      | 10.99 |
| 25 | ATG  | Antigua and B  | Cntry/Terr | 97.928      | 222.6     | 6.51  |
| 26 | VIR  | United States  | Cntry/Terr | 104.423     | 298.4     | 9.05  |
| 27 | SLV  | El Salvador    | Cntry/Terr | 6,486.201   | 313.0     | 7.11  |
| 28 | ES18 | Ceuta          | Spain      | 83.673      | 4,183.6   | 6.29  |
| 29 | BR50 | Mato Grosso (  | Brazil     | 2,810.886   | 7.9       | NA    |
| 30 | BIH  | Bosnia and He  | Cntry/Terr | 3,280.815   | 64.3      | 11.08 |
| 31 | AUT  | Austria        | Cntry/Terr | 9,006.400   | 109.3     | 9.93  |
| 32 | SUR  | Suriname       | Cntry/Terr | 586.634     | 3.8       | 7.46  |
| 33 | US16 | Idaho          | U.S.A.     | 1,774.655   | 8.3       | 8.16  |
| 34 | SLE  | Sierra Leone   | Cntry/Terr | 7,976.985   | 110.5     | 11.38 |
| 35 | SDN  | Sudan          | Cntry/Terr | 43,849.269  | 24.8      | 7.06  |
| 36 | IT15 | Campania       | Italy      | 5,801.773   | 424,534.7 | 9.20  |
| 37 | SWZ  | Eswatini       | Cntry/Terr | 1,160.164   | 67.5      | 9.17  |
| 38 | BLR  | Belarus        | Cntry/Terr | 9,449.321   | 46.6      | 12.56 |
| 39 | HUN  | Hungary        | Cntry/Terr | 9,660.350   | 106.7     | 12.74 |
| 40 | US54 | West Virginia  | U.S.A.     | 1,828.890   | 29.3      | 12.82 |
| 41 | IT20 | Sardegna       | Italy      | 1,643.577   | 68,239.9  | 9.90  |
| 42 | ISR  | Israel         | Cntry/Terr | 8,655.541   | 400.0     | 5.32  |
| 43 | US56 | Wyoming        | U.S.A.     | 584.633     | 2.3       | 8.23  |
| 44 | AZE  | Azerbaijan     | Cntry/Terr | 10,139.175  | 122.7     | 6.89  |
| 45 | GUM  | Guam           | Cntry/Terr | 168.783     | 312.6     | 5.36  |
| 46 |      |                |            |             |           |       |
| 47 |      |                |            |             |           |       |
| 48 |      |                |            |             |           |       |
| 49 |      |                |            |             |           |       |
| 50 |      |                |            |             |           |       |
| 51 |      |                |            |             |           |       |
| 52 |      |                |            |             |           |       |
| 53 |      |                |            |             |           |       |
| 54 |      |                |            |             |           |       |
| 55 |      |                |            |             |           |       |
| 56 |      |                |            |             |           |       |
| 57 |      |                |            |             |           |       |
| 58 |      |                |            |             |           |       |
| 59 |      |                |            |             |           |       |
| 60 |      |                |            |             |           |       |

1  
2  
3  
4  
5  
6  
7  
8  
9  
10  
11  
12  
13  
14  
15  
16  
17  
18  
19  
20  
21  
22  
23  
24  
25  
26  
27  
28  
29  
30  
31  
32  
33  
34  
35  
36  
37  
38  
39  
40  
41  
42  
43  
44  
45  
46  
47  
48  
49  
50  
51  
52  
53  
54  
55  
56  
57  
58  
59  
60

|      |             |            |               |           |       |
|------|-------------|------------|---------------|-----------|-------|
| IT10 | Umbria      | Italy      | 884.495       | 104,653.3 | 11.40 |
| ABW  | Aruba       | Cntry/Terr | 106.766       | 593.1     | 9.38  |
| FIN  | Finland     | Cntry/Terr | 5,540.718     | 18.2      | 9.90  |
| US41 | Oregon      | U.S.A.     | 4,244.225     | 17.1      | 8.84  |
| DZA  | Algeria     | Cntry/Terr | 43,851.043    | 18.4      | 4.73  |
| TCD  | Chad        | Cntry/Terr | 16,425.859    | 13.0      | 11.75 |
| COG  | Congo       | Cntry/Terr | 5,518.092     | 16.2      | 6.62  |
| EST  | Estonia     | Cntry/Terr | 1,326.539     | 31.3      | 11.89 |
| SEN  | Senegal     | Cntry/Terr | 16,743.930    | 87.0      | 5.52  |
| KGZ  | Kyrgyzstan  | Cntry/Terr | 6,524.191     | 34.0      | 5.93  |
| PRI  | Puerto Rico | Cntry/Terr | 2,860.840     | 322.5     | 9.83  |
| MLI  | Mali        | Cntry/Terr | 20,250.834    | 16.6      | 9.23  |
| IT14 | Molise      | Italy      | 306.556       | 68,830.7  | 12.10 |
| SVN  | Slovenia    | Cntry/Terr | 2,078.932     | 103.2     | 10.20 |
| NOR  | Norway      | Cntry/Terr | 5,421.242     | 14.8      | 7.95  |
| LBR  | Liberia     | Cntry/Terr | 5,057.677     | 52.5      | 7.34  |
| TJK  | Tajikistan  | Cntry/Terr | 9,537.642     | 68.1      | 4.75  |
| ARG  | Argentina   | Cntry/Terr | 45,195.777    | 16.5      | 7.61  |
| SRB  | Serbia      | Cntry/Terr | 8,737.370     | 99.9      | 13.23 |
| SOM  | Somalia     | Cntry/Terr | 15,893.219    | 25.3      | 10.54 |
| IT19 | Sicilia     | Italy      | 5,005.165     | 193,904.0 | 10.40 |
| GUY  | Guyana      | Cntry/Terr | 786.559       | 4.0       | 7.67  |
| NIC  | Nicaragua   | Cntry/Terr | 6,624.554     | 55.0      | 5.10  |
| HTI  | Haiti       | Cntry/Terr | 11,402.533    | 413.7     | 8.42  |
| POL  | Poland      | Cntry/Terr | 37,846.605    | 123.6     | 10.37 |
| SSD  | South Sudan | Cntry/Terr | 11,193.729    | 18.3      | 10.23 |
| ES19 | Melilla     | Spain      | 85.187        | 7,098.9   | 5.78  |
| IT18 | Calabria    | Italy      | 1,949.987     | 128,147.1 | 10.10 |
| IT17 | Basilicata  | Italy      | 564.286       | 56,076.9  | 11.10 |
| BGD  | Bangladesh  | Cntry/Terr | 164,689.383   | 1,265.2   | 5.54  |
| GLP  | Guadeloupe  | Cntry/Terr | 400.127       | 245.8     | 8.49  |
| IND  | India       | Cntry/Terr | 1,380,004.385 | 464.1     | 7.33  |
| ISL  | Iceland     | Cntry/Terr | 341.250       | 3.4       | 6.79  |
| CZE  | Czechia     | Cntry/Terr | 10,708.982    | 138.6     | 10.68 |
| US02 | Alaska      | U.S.A.     | 745.469       | 0.5       | 5.96  |
| MTQ  | Martinique  | Cntry/Terr | 375.265       | 354.0     | 9.40  |
| UKR  | Ukraine     | Cntry/Terr | 43,733.759    | 75.5      | 15.19 |
| BRB  | Barbados    | Cntry/Terr | 287.371       | 668.3     | 9.14  |
| ALB  | Albania     | Cntry/Terr | 2,877.800     | 105.0     | 8.26  |
| BGR  | Bulgaria    | Cntry/Terr | 6,948.445     | 64.0      | 15.51 |
| IDN  | Indonesia   | Cntry/Terr | 273,523.621   | 151.0     | 6.60  |
| PHL  | Philippines | Cntry/Terr | 109,581.085   | 367.5     | 6.00  |
| KAZ  | Kazakhstan  | Cntry/Terr | 18,776.707    | 7.0       | 7.24  |

|    |      |                 |            |             |         |       |
|----|------|-----------------|------------|-------------|---------|-------|
| 1  |      |                 |            |             |         |       |
| 2  |      |                 |            |             |         |       |
| 3  | MNE  | Montenegro      | Cntry/Terr | 628.062     | 46.7    | 10.77 |
| 4  | HRV  | Croatia         | Cntry/Terr | 4,105.268   | 73.4    | 13.22 |
| 5  | LTU  | Lithuania       | Cntry/Terr | 2,722.291   | 43.4    | 14.00 |
| 6  | MLT  | Malta           | Cntry/Terr | 441.539     | 1,379.8 | 8.60  |
| 7  | US30 | Montana         | U.S.A.     | 1,076.137   | 2.9     | 9.71  |
| 8  | GIN  | Guinea          | Cntry/Terr | 13,132.792  | 53.4    | 8.11  |
| 9  | BRN  | Brunei Daruss   | Cntry/Terr | 437.483     | 83.0    | 4.68  |
| 10 | NER  | Niger           | Cntry/Terr | 24,206.636  | 19.1    | 7.89  |
| 11 | GHA  | Ghana           | Cntry/Terr | 31,072.945  | 136.6   | 7.19  |
| 12 | CYP  | Cyprus          | Cntry/Terr | 1,207.361   | 130.7   | 7.20  |
| 13 | NGA  | Nigeria         | Cntry/Terr | 206,139.587 | 226.3   | 11.48 |
| 14 | KEN  | Kenya           | Cntry/Terr | 53,771.300  | 94.5    | 5.43  |
| 15 | BLZ  | Belize          | Cntry/Terr | 397.621     | 17.4    | 4.81  |
| 16 | BFA  | Burkina Faso    | Cntry/Terr | 20,903.278  | 76.4    | 7.76  |
| 17 | CIV  | Cote d'Ivoire   | Cntry/Terr | 26,378.275  | 83.0    | 9.78  |
| 18 | LVA  | Latvia          | Cntry/Terr | 1,886.202   | 30.3    | 14.78 |
| 19 | LBY  | Libya           | Cntry/Terr | 6,871.287   | 3.9     | 5.15  |
| 20 | ZMB  | Zambia          | Cntry/Terr | 18,383.956  | 24.7    | 6.33  |
| 21 | MAR  | Morocco         | Cntry/Terr | 36,910.558  | 82.7    | 5.09  |
| 22 | US15 | Hawaii          | U.S.A.     | 1,439.609   | 86.5    | 7.98  |
| 23 | MUS  | Mauritius       | Cntry/Terr | 1,271.767   | 626.5   | 8.71  |
| 24 | GRC  | Greece          | Cntry/Terr | 10,423.056  | 80.9    | 11.09 |
| 25 | COD  | Democratic Re   | Cntry/Terr | 89,561.404  | 39.5    | 9.17  |
| 26 | TGO  | Togo            | Cntry/Terr | 8,278.737   | 152.2   | 8.23  |
| 27 | BEN  | Benin           | Cntry/Terr | 12,123.198  | 107.5   | 8.58  |
| 28 | LBN  | Lebanon         | Cntry/Terr | 6,825.442   | 667.2   | 4.59  |
| 29 | MDG  | Madagascar      | Cntry/Terr | 27,691.019  | 47.6    | 5.85  |
| 30 | TTO  | Trinidad and T  | Cntry/Terr | 1,399.491   | 272.8   | 8.67  |
| 31 | URY  | Uruguay         | Cntry/Terr | 3,473.727   | 19.8    | 9.48  |
| 32 | PSE  | State of Palest | Cntry/Terr | 5,101.416   | 847.4   | 3.46  |
| 33 | MYS  | Malaysia        | Cntry/Terr | 32,365.998  | 98.5    | 5.27  |
| 34 | TUN  | Tunisia         | Cntry/Terr | 11,818.618  | 76.1    | 6.28  |
| 35 | CUB  | Cuba            | Cntry/Terr | 11,326.616  | 106.4   | 9.29  |
| 36 | NPL  | Nepal           | Cntry/Terr | 29,136.808  | 203.3   | 6.31  |
| 37 | REU  | Reunion         | Cntry/Terr | 895.308     | 358.1   | 6.33  |
| 38 | SVK  | Slovakia        | Cntry/Terr | 5,459.643   | 113.5   | 10.12 |
| 39 | PRY  | Paraguay        | Cntry/Terr | 7,132.530   | 18.0    | 5.60  |
| 40 | MWI  | Malawi          | Cntry/Terr | 19,129.955  | 202.9   | 6.37  |
| 41 | CUW  | Curacao         | Cntry/Terr | 164.100     | 369.6   | 9.08  |
| 42 | JAM  | Jamaica         | Cntry/Terr | 2,961.161   | 273.4   | 7.63  |
| 43 | SGP  | Singapore       | Cntry/Terr | 5,850.343   | 8,357.6 | 4.83  |
| 44 | GMB  | Gambia          | Cntry/Terr | 2,416.664   | 238.8   | 7.55  |
| 45 | CRI  | Costa Rica      | Cntry/Terr | 5,094.114   | 99.8    | 5.24  |
| 46 |      |                 |            |             |         |       |
| 47 |      |                 |            |             |         |       |
| 48 |      |                 |            |             |         |       |
| 49 |      |                 |            |             |         |       |
| 50 |      |                 |            |             |         |       |
| 51 |      |                 |            |             |         |       |
| 52 |      |                 |            |             |         |       |
| 53 |      |                 |            |             |         |       |
| 54 |      |                 |            |             |         |       |
| 55 |      |                 |            |             |         |       |
| 56 |      |                 |            |             |         |       |
| 57 |      |                 |            |             |         |       |
| 58 |      |                 |            |             |         |       |
| 59 |      |                 |            |             |         |       |
| 60 |      |                 |            |             |         |       |

1  
2  
3  
4  
5  
6  
7  
8  
9  
10  
11  
12  
13  
14  
15  
16  
17  
18  
19  
20  
21  
22  
23  
24  
25  
26  
27  
28  
29  
30  
31  
32  
33  
34  
35  
36  
37  
38  
39  
40  
41  
42  
43  
44  
45  
46  
47  
48  
49  
50  
51  
52  
53  
54  
55  
56  
57  
58  
59  
60

|      |                             |            |               |         |       |
|------|-----------------------------|------------|---------------|---------|-------|
| GEO  | Georgia                     | Cntry/Terr | 3,989.175     | 57.4    | 12.77 |
| NZL  | New Zealand                 | Cntry/Terr | 4,822.233     | 18.3    | 7.11  |
| ETH  | Ethiopia                    | Cntry/Terr | 114,963.583   | 115.0   | 6.33  |
| KOR  | Republic of Korea           | Cntry/Terr | 51,269.183    | 527.3   | 6.40  |
| VEN  | Venezuela (Bolivia)         | Cntry/Terr | 28,435.943    | 32.2    | 7.14  |
| AGO  | Angola                      | Cntry/Terr | 32,866.268    | 26.4    | 7.89  |
| JOR  | Jordan                      | Cntry/Terr | 10,203.140    | 114.9   | 3.93  |
| RWA  | Rwanda                      | Cntry/Terr | 12,952.209    | 525.0   | 5.11  |
| AUS  | Australia                   | Cntry/Terr | 25,499.881    | 3.3     | 6.66  |
| JPN  | Japan                       | Cntry/Terr | 126,476.458   | 346.9   | 10.98 |
| MOZ  | Mozambique                  | Cntry/Terr | 31,255.435    | 39.7    | 8.12  |
| CHN  | China                       | Cntry/Terr | 1,439,323.774 | 153.3   | 7.47  |
| UZB  | Uzbekistan                  | Cntry/Terr | 33,469.199    | 78.7    | 5.83  |
| ZWE  | Zimbabwe                    | Cntry/Terr | 14,862.927    | 38.4    | 7.85  |
| TZA  | United Republic of Tanzania | Cntry/Terr | 59,734.213    | 67.4    | 6.21  |
| BWA  | Botswana                    | Cntry/Terr | 2,351.625     | 4.1     | 5.86  |
| SYR  | Syrian Arab Republic        | Cntry/Terr | 17,500.657    | 95.3    | 4.80  |
| LKA  | Sri Lanka                   | Cntry/Terr | 21,413.250    | 341.5   | 6.87  |
| THA  | Thailand                    | Cntry/Terr | 69,799.978    | 136.6   | 7.95  |
| BDI  | Burundi                     | Cntry/Terr | 11,890.781    | 463.0   | 7.66  |
| CN21 | Hainan                      | China      | 9,689.620     | 285.0   | 6.01  |
| HKG  | China, Hong Kong            | Cntry/Terr | 7,496.988     | 7,140.0 | 6.88  |
| CN01 | Beijing                     | China      | 22,086.180    | 1,314.7 | 5.58  |
| MMR  | Myanmar                     | Cntry/Terr | 54,409.794    | 83.3    | 8.31  |
| CN08 | Heilongjiang                | China      | 38,461.125    | 84.7    | 6.67  |
| CN09 | Shanghai                    | China      | 24,895.657    | 3,926.1 | 5.40  |
| CN16 | Henan                       | China      | 98,844.373    | 591.9   | 6.80  |
| TWN  | China, Taiwan               | Cntry/Terr | 23,816.775    | 672.6   | 7.83  |
| CN02 | Tianjin                     | China      | 16,016.070    | 1,416.7 | 5.42  |
| CN22 | Chongqing                   | China      | 32,032.139    | 389.2   | 7.54  |
| CN31 | Xinjiang                    | China      | 25,869.746    | 15.6    | 4.56  |
| CN12 | Anhui                       | China      | 65,274.199    | 467.2   | 5.96  |
| CN27 | Shaanxi                     | China      | 39,619.778    | 192.7   | 6.24  |
| CN28 | Gansu                       | China      | 27,141.188    | 59.7    | 6.65  |
| CN07 | Jilin                       | China      | 27,592.345    | 147.2   | 6.26  |
| CN03 | Hebei                       | China      | 77,845.071    | 414.7   | 6.38  |
| CN15 | Shandong                    | China      | 103,253.406   | 671.3   | 7.18  |
| CN19 | Guangdong                   | China      | 118,131.330   | 656.3   | 4.55  |
| CN18 | Hunan                       | China      | 70,934.167    | 337.8   | 7.08  |
| CN24 | Guizhou                     | China      | 37,148.668    | 211.1   | 6.85  |
| CN06 | Liaoning                    | China      | 44,623.518    | 305.9   | 7.39  |
| CN05 | Inner Mongolia              | China      | 26,044.057    | 22.0    | 5.95  |
| CN25 | Yunnan                      | China      | 49,811.822    | 126.4   | 6.32  |

|    |      |                  |            |            |          |      |
|----|------|------------------|------------|------------|----------|------|
| 1  |      |                  |            |            |          |      |
| 2  |      |                  |            |            |          |      |
| 3  | CN20 | Guangxi          | China      | 50,857.686 | 215.5    | 5.96 |
| 4  | CN23 | Sichuan          | China      | 85,873.612 | 177.1    | 7.01 |
| 5  | CN13 | Fujian           | China      | 40,737.416 | 335.1    | 6.20 |
| 6  | CN14 | Jiangxi          | China      | 47,843.137 | 286.5    | 6.06 |
| 7  | CN11 | Zhejiang         | China      | 59,983.359 | 588.1    | 5.58 |
| 8  | AND  | Andorra          | Cntry/Terr | 77.265     | 164.4    | NA   |
| 9  | BMU  | Bermuda          | Cntry/Terr | 62.273     | 1,245.5  | NA   |
| 10 | CYM  | Cayman Islanc    | Cntry/Terr | 65.720     | 273.8    | NA   |
| 11 | IMN  | Isle of Man      | Cntry/Terr | 85.032     | 149.2    | NA   |
| 12 | IT04 | NA               | NA         | 1,073.057  | 78,895.1 | 8.80 |
| 13 | LIE  | Liechtenstein    | Cntry/Terr | 38.137     | 238.4    | NA   |
| 14 | MAF  | Saint Martin (I  | Cntry/Terr | 38.659     | 729.4    | NA   |
| 15 | MCO  | Monaco           | Cntry/Terr | 39.244     | 26,338.3 | NA   |
| 16 | MNP  | Northern Mar     | Cntry/Terr | 57.557     | 125.1    | NA   |
| 17 | MSR  | Montserrat       | Cntry/Terr | 4.999      | 50.0     | NA   |
| 18 | SMR  | San Marino       | Cntry/Terr | 33.938     | 565.6    | NA   |
| 19 | SXM  | Siint Maarten    | Cntry/Terr | 42.882     | 1,261.2  | NA   |
| 20 | TCA  | Turks and Caic   | Cntry/Terr | 38.718     | 40.8     | NA   |
| 21 | VGB  | British Virgin I | Cntry/Terr | 30.237     | 201.6    | NA   |
| 22 |      |                  |            |            |          |      |
| 23 |      |                  |            |            |          |      |
| 24 |      |                  |            |            |          |      |
| 25 |      |                  |            |            |          |      |
| 26 |      |                  |            |            |          |      |
| 27 |      |                  |            |            |          |      |
| 28 |      |                  |            |            |          |      |
| 29 |      |                  |            |            |          |      |
| 30 |      |                  |            |            |          |      |
| 31 |      |                  |            |            |          |      |
| 32 |      |                  |            |            |          |      |
| 33 |      |                  |            |            |          |      |
| 34 |      |                  |            |            |          |      |
| 35 |      |                  |            |            |          |      |
| 36 |      |                  |            |            |          |      |
| 37 |      |                  |            |            |          |      |
| 38 |      |                  |            |            |          |      |
| 39 |      |                  |            |            |          |      |
| 40 |      |                  |            |            |          |      |
| 41 |      |                  |            |            |          |      |
| 42 |      |                  |            |            |          |      |
| 43 |      |                  |            |            |          |      |
| 44 |      |                  |            |            |          |      |
| 45 |      |                  |            |            |          |      |
| 46 |      |                  |            |            |          |      |
| 47 |      |                  |            |            |          |      |
| 48 |      |                  |            |            |          |      |
| 49 |      |                  |            |            |          |      |
| 50 |      |                  |            |            |          |      |
| 51 |      |                  |            |            |          |      |
| 52 |      |                  |            |            |          |      |
| 53 |      |                  |            |            |          |      |
| 54 |      |                  |            |            |          |      |
| 55 |      |                  |            |            |          |      |
| 56 |      |                  |            |            |          |      |
| 57 |      |                  |            |            |          |      |
| 58 |      |                  |            |            |          |      |
| 59 |      |                  |            |            |          |      |
| 60 |      |                  |            |            |          |      |

|    | Days_Est | CCDR_Est | CCMR_Est | ISCDR_Est | Days_Proj | CCDR_Proj | CCMR_Proj |      |
|----|----------|----------|----------|-----------|-----------|-----------|-----------|------|
| 1  |          |          |          |           |           |           |           |      |
| 2  |          |          |          |           |           |           |           |      |
| 3  |          |          |          |           |           |           |           |      |
| 4  |          |          |          |           |           |           |           |      |
| 5  |          | 93       | 2.19     | 5.08      | 5.83      | 183       | 1.88      | 4.37 |
| 6  |          | 97       | 1.52     | 4.66      | 5.35      | 187       | 1.93      | 5.91 |
| 7  |          | 110      | 5.58     | 4.61      | 5.30      | 200       | 3.25      | 2.69 |
| 8  |          | 112      | 5.30     | 4.36      | 5.01      | 202       | 3.04      | 2.51 |
| 9  |          | 100      | 2.49     | 3.69      | 4.24      | 190       | 1.65      | 2.44 |
| 10 |          | 101      | 2.47     | 3.67      | 4.21      | 191       | 1.95      | 2.90 |
| 11 |          | 91       | 2.32     | 3.45      | 3.95      | 181       | 1.64      | 2.43 |
| 12 |          | 93       | 1.69     | 3.42      | 3.93      | 183       | 1.53      | 3.09 |
| 13 |          | 105      | 4.06     | 3.34      | 3.83      | 195       | 2.73      | 2.24 |
| 14 |          | 94       | 2.24     | 3.32      | 3.81      | 184       | 1.50      | 2.22 |
| 15 |          | 107      | 2.24     | 3.24      | 3.72      | 197       | 1.79      | 2.59 |
| 16 |          | 106      | 4.13     | 3.19      | 3.66      | 196       | 2.38      | 1.83 |
| 17 |          | 99       | 2.88     | 3.18      | 3.66      | 189       | 1.70      | 1.88 |
| 18 |          | 107      | 2.02     | 3.00      | 3.44      | 197       | 2.04      | 3.02 |
| 19 |          | 91       | 2.01     | 2.98      | 3.42      | 181       | 2.15      | 3.19 |
| 20 |          | 115      | 4.77     | 2.86      | 3.28      | 205       | 2.65      | 1.59 |
| 21 |          | 95       | 1.62     | 2.79      | 3.20      | 185       | 1.27      | 2.18 |
| 22 |          | 101      | 1.86     | 2.76      | 3.17      | 191       | 2.05      | 3.04 |
| 23 |          | 133      | 4.55     | 2.66      | 3.06      | 223       | 3.02      | 1.76 |
| 24 |          | 122      | 3.82     | 2.66      | 3.05      | 212       | 2.34      | 1.63 |
| 25 |          | 88       | 1.76     | 2.61      | 3.00      | 178       | 1.87      | 2.78 |
| 26 |          | 97       | 3.38     | 2.61      | 2.99      | 187       | 2.44      | 1.88 |
| 27 |          | 93       | 1.67     | 2.48      | 2.85      | 183       | 1.91      | 2.84 |
| 28 |          | 111      | 2.28     | 2.15      | 2.47      | 201       | 1.64      | 1.55 |
| 29 |          | 95       | 1.00     | 2.14      | 2.46      | 185       | 1.46      | 3.13 |
| 30 |          | 84       | 1.19     | 2.11      | 2.42      | 174       | 1.69      | 2.99 |
| 31 |          | 115      | 3.69     | 2.04      | 2.34      | 205       | 3.04      | 1.68 |
| 32 |          | 117      | 3.63     | 2.04      | 2.34      | 207       | 2.59      | 1.45 |
| 33 |          | 96       | 1.27     | 2.03      | 2.33      | 186       | 1.38      | 2.19 |
| 34 |          | 111      | 2.78     | 1.96      | 2.26      | 201       | 1.55      | 1.10 |
| 35 |          | 90       | 1.02     | 1.92      | 2.20      | 180       | 1.25      | 2.35 |
| 36 |          | 86       | 1.25     | 1.86      | 2.14      | 176       | 1.55      | 2.29 |
| 37 |          | 95       | 1.25     | 1.85      | 2.12      | 185       | 1.75      | 2.60 |
| 38 |          | 87       | 0.99     | 1.85      | 2.12      | 177       | 1.52      | 2.84 |
| 39 |          | 93       | 1.23     | 1.82      | 2.09      | 183       | 2.58      | 3.83 |
| 40 |          | 97       | 1.17     | 1.74      | 2.00      | 187       | 1.79      | 2.65 |
| 41 |          | 107      | 2.10     | 1.72      | 1.97      | 197       | 1.18      | 0.97 |
| 42 |          | 106      | 1.05     | 1.70      | 1.95      | 196       | 2.05      | 3.31 |
| 43 |          | 113      | 3.76     | 1.70      | 1.95      | 203       | 1.46      | 0.66 |
| 44 |          | 96       | 1.13     | 1.67      | 1.92      | 186       | 1.10      | 1.63 |
| 45 |          | 105      | 1.83     | 1.66      | 1.90      | 195       | 1.08      | 0.98 |
| 46 |          | 109      | 1.11     | 1.65      | 1.89      | 199       | 1.46      | 2.17 |
| 47 |          |          |          |           |           |           |           |      |
| 48 |          |          |          |           |           |           |           |      |
| 49 |          |          |          |           |           |           |           |      |
| 50 |          |          |          |           |           |           |           |      |
| 51 |          |          |          |           |           |           |           |      |
| 52 |          |          |          |           |           |           |           |      |
| 53 |          |          |          |           |           |           |           |      |
| 54 |          |          |          |           |           |           |           |      |
| 55 |          |          |          |           |           |           |           |      |
| 56 |          |          |          |           |           |           |           |      |
| 57 |          |          |          |           |           |           |           |      |
| 58 |          |          |          |           |           |           |           |      |
| 59 |          |          |          |           |           |           |           |      |
| 60 |          |          |          |           |           |           |           |      |



|    |     |      |      |      |     |      |      |
|----|-----|------|------|------|-----|------|------|
| 1  |     |      |      |      |     |      |      |
| 2  |     |      |      |      |     |      |      |
| 3  | 111 | 2.67 | 1.64 | 1.89 | 201 | 1.38 | 0.85 |
| 4  | 108 | 1.83 | 1.59 | 1.82 | 198 | 1.24 | 1.07 |
| 5  | 111 | 0.87 | 1.56 | 1.79 | 201 | 2.09 | 3.77 |
| 6  | 92  | 0.94 | 1.55 | 1.78 | 182 | 1.58 | 2.62 |
| 7  | 94  | 0.50 | 1.54 | 1.77 | NA  | NA   | NA   |
| 8  | 99  | 1.93 | 1.53 | 1.76 | 189 | 1.14 | 0.90 |
| 9  | 118 | 2.31 | 1.51 | 1.74 | 208 | 1.33 | 0.87 |
| 10 | 120 | 1.98 | 1.48 | 1.70 | 210 | 1.23 | 0.92 |
| 11 | 94  | 1.00 | 1.48 | 1.70 | 184 | 1.55 | 2.30 |
| 12 | 121 | 2.84 | 1.46 | 1.68 | 211 | 1.90 | 0.98 |
| 13 | 109 | 0.98 | 1.45 | 1.66 | 199 | 1.44 | 2.13 |
| 14 | 85  | 0.73 | 1.44 | 1.66 | 175 | 1.41 | 2.78 |
| 15 | 129 | 2.71 | 1.44 | 1.65 | 219 | 1.73 | 0.92 |
| 16 | 97  | 0.86 | 1.43 | 1.64 | 187 | 1.14 | 1.91 |
| 17 | 65  | 0.33 | 1.42 | 1.63 | 155 | 0.11 | 0.48 |
| 18 | 96  | 0.81 | 1.41 | 1.62 | 186 | 1.38 | 2.41 |
| 19 | 114 | 2.40 | 1.41 | 1.62 | 204 | 1.58 | 0.93 |
| 20 | 107 | 0.77 | 1.37 | 1.58 | 197 | 1.27 | 2.25 |
| 21 | 89  | 0.84 | 1.35 | 1.55 | 179 | 1.61 | 2.56 |
| 22 | 106 | 1.79 | 1.34 | 1.54 | 196 | 1.17 | 0.88 |
| 23 | 123 | 2.98 | 1.33 | 1.53 | 213 | 2.15 | 0.96 |
| 24 | 87  | 0.89 | 1.31 | 1.51 | 177 | 1.52 | 2.25 |
| 25 | 111 | 1.77 | 1.25 | 1.44 | 201 | 1.04 | 0.73 |
| 26 | 105 | 1.08 | 1.24 | 1.43 | 195 | 2.49 | 2.86 |
| 27 | 102 | 1.30 | 1.21 | 1.39 | 192 | 1.24 | 1.16 |
| 28 | 108 | 1.33 | 1.18 | 1.36 | 198 | 0.81 | 0.72 |
| 29 | 122 | 1.82 | 1.16 | 1.34 | 212 | 1.06 | 0.68 |
| 30 | 118 | 2.15 | 1.16 | 1.33 | 208 | 1.13 | 0.61 |
| 31 | 97  | 0.78 | 1.16 | 1.33 | 187 | 1.28 | 1.90 |
| 32 | 114 | 1.76 | 1.15 | 1.32 | 204 | 1.06 | 0.69 |
| 33 | 115 | 1.12 | 1.14 | 1.31 | 205 | 0.65 | 0.66 |
| 34 | 92  | 0.76 | 1.13 | 1.29 | 182 | 1.95 | 2.89 |
| 35 | 95  | 0.54 | 1.12 | 1.28 | 185 | 1.33 | 2.73 |
| 36 | 95  | 0.71 | 1.11 | 1.27 | 185 | 1.38 | 2.14 |
| 37 | 92  | 0.66 | 1.04 | 1.20 | 182 | 1.44 | 2.26 |
| 38 | 83  | 0.50 | 1.03 | 1.18 | 173 | 1.53 | 3.17 |
| 39 | 84  | 0.47 | 1.02 | 1.17 | 174 | 1.25 | 2.71 |
| 40 | 108 | 1.00 | 1.00 | 1.15 | 198 | 0.68 | 0.68 |
| 41 | 124 | 1.15 | 1.00 | 1.15 | 214 | 0.91 | 0.79 |
| 42 | 93  | 0.43 | 0.99 | 1.13 | 183 | 1.37 | 3.16 |
| 43 | 124 | 1.91 | 0.98 | 1.12 | 214 | 1.22 | 0.63 |
| 44 | 109 | 0.90 | 0.94 | 1.08 | 199 | 0.90 | 0.94 |
| 45 | 74  | 0.18 | 0.93 | 1.07 | 164 | 0.95 | 4.91 |
| 46 |     |      |      |      |     |      |      |
| 47 |     |      |      |      |     |      |      |
| 48 |     |      |      |      |     |      |      |
| 49 |     |      |      |      |     |      |      |
| 50 |     |      |      |      |     |      |      |
| 51 |     |      |      |      |     |      |      |
| 52 |     |      |      |      |     |      |      |
| 53 |     |      |      |      |     |      |      |
| 54 |     |      |      |      |     |      |      |
| 55 |     |      |      |      |     |      |      |
| 56 |     |      |      |      |     |      |      |
| 57 |     |      |      |      |     |      |      |
| 58 |     |      |      |      |     |      |      |
| 59 |     |      |      |      |     |      |      |
| 60 |     |      |      |      |     |      |      |

|    |     |      |      |      |     |      |      |
|----|-----|------|------|------|-----|------|------|
| 1  |     |      |      |      |     |      |      |
| 2  |     |      |      |      |     |      |      |
| 3  | 92  | 0.33 | 0.92 | 1.05 | 182 | 0.82 | 2.25 |
| 4  | 133 | 1.58 | 0.91 | 1.05 | 223 | 1.13 | 0.65 |
| 5  | 80  | 0.60 | 0.89 | 1.02 | 170 | 1.32 | 1.96 |
| 6  | 116 | 1.54 | 0.88 | 1.01 | 206 | 0.87 | 0.50 |
| 7  | 78  | 0.49 | 0.83 | 0.95 | 168 | 0.34 | 0.58 |
| 8  | 93  | 1.08 | 0.82 | 0.94 | 183 | 1.12 | 0.86 |
| 9  | 100 | 0.96 | 0.82 | 0.94 | 190 | 0.62 | 0.53 |
| 10 | 120 | 1.09 | 0.80 | 0.92 | 210 | 0.65 | 0.48 |
| 11 | 90  | 0.44 | 0.80 | 0.92 | 180 | 1.35 | 2.46 |
| 12 | 140 | 1.20 | 0.79 | 0.91 | 230 | 0.74 | 0.49 |
| 13 | 95  | 0.53 | 0.78 | 0.89 | 185 | 1.48 | 2.17 |
| 14 | 100 | 0.99 | 0.76 | 0.87 | NA  | NA   | NA   |
| 15 | 96  | 0.42 | 0.76 | 0.87 | 186 | 1.24 | 2.25 |
| 16 | 96  | 0.90 | 0.75 | 0.86 | 186 | 0.74 | 0.62 |
| 17 | 116 | 0.49 | 0.75 | 0.86 | 206 | 1.15 | 1.77 |
| 18 | 136 | 0.36 | 0.74 | 0.85 | 226 | 1.00 | 2.07 |
| 19 | 97  | 0.49 | 0.72 | 0.83 | 187 | 1.27 | 1.88 |
| 20 | 104 | 0.85 | 0.71 | 0.82 | 194 | 1.08 | 0.90 |
| 21 | 100 | 0.57 | 0.71 | 0.81 | 190 | 0.53 | 0.66 |
| 22 | 109 | 1.25 | 0.70 | 0.80 | 199 | 0.66 | 0.37 |
| 23 | 105 | 0.85 | 0.69 | 0.79 | 195 | 0.65 | 0.53 |
| 24 | 86  | 0.24 | 0.68 | 0.78 | 176 | 0.20 | 0.56 |
| 25 | 105 | 0.73 | 0.67 | 0.77 | 195 | 0.49 | 0.44 |
| 26 | 75  | 0.26 | 0.66 | 0.76 | NA  | NA   | NA   |
| 27 | 131 | 1.15 | 0.66 | 0.76 | 221 | 0.92 | 0.53 |
| 28 | 100 | 0.82 | 0.65 | 0.75 | 190 | 0.50 | 0.39 |
| 29 | 122 | 0.16 | 0.64 | 0.73 | 212 | 0.93 | 3.70 |
| 30 | 100 | 0.73 | 0.63 | 0.73 | 190 | 0.75 | 0.65 |
| 31 | 104 | 0.54 | 0.61 | 0.70 | 194 | 1.19 | 1.34 |
| 32 | 106 | 0.48 | 0.61 | 0.70 | 196 | 1.01 | 1.28 |
| 33 | 111 | 0.18 | 0.61 | 0.70 | 201 | 0.81 | 2.71 |
| 34 | 116 | 1.11 | 0.60 | 0.69 | 206 | 0.80 | 0.44 |
| 35 | 118 | 0.89 | 0.60 | 0.69 | 208 | 0.50 | 0.33 |
| 36 | 116 | 0.73 | 0.58 | 0.66 | 206 | 0.47 | 0.37 |
| 37 | 100 | 0.22 | 0.57 | 0.65 | 190 | 0.96 | 2.51 |
| 38 | 104 | 0.60 | 0.57 | 0.65 | 194 | 0.58 | 0.55 |
| 39 | 98  | 0.15 | 0.56 | 0.64 | 188 | 0.40 | 1.48 |
| 40 | 96  | 0.29 | 0.56 | 0.64 | 186 | 1.08 | 2.09 |
| 41 | 102 | 0.32 | 0.56 | 0.64 | 192 | 0.75 | 1.29 |
| 42 | 98  | 0.36 | 0.55 | 0.63 | 188 | 1.16 | 1.77 |
| 43 | 102 | 0.18 | 0.52 | 0.60 | 192 | 1.07 | 3.07 |
| 44 | 113 | 0.57 | 0.52 | 0.60 | 203 | 0.33 | 0.30 |
| 45 | 90  | 0.27 | 0.51 | 0.59 | 180 | 1.45 | 2.72 |
| 46 |     |      |      |      |     |      |      |
| 47 |     |      |      |      |     |      |      |
| 48 |     |      |      |      |     |      |      |
| 49 |     |      |      |      |     |      |      |
| 50 |     |      |      |      |     |      |      |
| 51 |     |      |      |      |     |      |      |
| 52 |     |      |      |      |     |      |      |
| 53 |     |      |      |      |     |      |      |
| 54 |     |      |      |      |     |      |      |
| 55 |     |      |      |      |     |      |      |
| 56 |     |      |      |      |     |      |      |
| 57 |     |      |      |      |     |      |      |
| 58 |     |      |      |      |     |      |      |
| 59 |     |      |      |      |     |      |      |
| 60 |     |      |      |      |     |      |      |

|    |     |      |      |      |     |      |      |
|----|-----|------|------|------|-----|------|------|
| 1  |     |      |      |      |     |      |      |
| 2  |     |      |      |      |     |      |      |
| 3  | 115 | 0.63 | 0.51 | 0.58 | 205 | 0.37 | 0.30 |
| 4  | 95  | 0.14 | 0.51 | 0.58 | 185 | 0.56 | 1.99 |
| 5  | 105 | 0.28 | 0.50 | 0.57 | 195 | 1.14 | 2.03 |
| 6  | 115 | 1.04 | 0.50 | 0.57 | 205 | 0.61 | 0.29 |
| 7  | 121 | 0.69 | 0.49 | 0.56 | 211 | 0.44 | 0.32 |
| 8  | 106 | 0.58 | 0.48 | 0.55 | 196 | 0.50 | 0.41 |
| 9  | 99  | 0.18 | 0.48 | 0.55 | NA  | NA   | NA   |
| 10 | 117 | 0.93 | 0.47 | 0.54 | 207 | 0.81 | 0.41 |
| 11 | 115 | 0.50 | 0.47 | 0.54 | 205 | 0.44 | 0.41 |
| 12 | 87  | 0.26 | 0.47 | 0.54 | 177 | 1.29 | 2.31 |
| 13 | 92  | 0.11 | 0.47 | 0.53 | 182 | 0.24 | 1.00 |
| 14 | 97  | 0.55 | 0.46 | 0.53 | 187 | 0.50 | 0.43 |
| 15 | 129 | 0.50 | 0.46 | 0.53 | 219 | 0.45 | 0.42 |
| 16 | 105 | 0.53 | 0.46 | 0.53 | 195 | 0.50 | 0.43 |
| 17 | 118 | 0.88 | 0.44 | 0.51 | 208 | 0.73 | 0.37 |
| 18 | 105 | 0.11 | 0.44 | 0.51 | 195 | 0.12 | 0.47 |
| 19 | 100 | 0.49 | 0.44 | 0.50 | 190 | 0.41 | 0.36 |
| 20 | 42  | 0.08 | 0.43 | 0.49 | 132 | 1.12 | 5.65 |
| 21 | 100 | 0.28 | 0.42 | 0.48 | 190 | 1.17 | 1.74 |
| 22 | 110 | 0.23 | 0.42 | 0.48 | 200 | 0.96 | 1.69 |
| 23 | 112 | 0.15 | 0.41 | 0.47 | 202 | 1.02 | 2.74 |
| 24 | 113 | 0.55 | 0.41 | 0.47 | 203 | 0.41 | 0.30 |
| 25 | 105 | 0.45 | 0.39 | 0.45 | 195 | 0.32 | 0.28 |
| 26 | 104 | 0.25 | 0.39 | 0.45 | 194 | 1.31 | 2.04 |
| 27 | 106 | 0.47 | 0.38 | 0.43 | 196 | 0.40 | 0.32 |
| 28 | 112 | 0.55 | 0.38 | 0.43 | 202 | 1.12 | 0.77 |
| 29 | 104 | 0.07 | 0.37 | 0.43 | 194 | 0.13 | 0.68 |
| 30 | 112 | 0.75 | 0.36 | 0.42 | 202 | 0.44 | 0.21 |
| 31 | 89  | 0.45 | 0.36 | 0.41 | 179 | 0.52 | 0.41 |
| 32 | 93  | 0.23 | 0.35 | 0.40 | 183 | 0.97 | 1.47 |
| 33 | 108 | 0.21 | 0.34 | 0.39 | 198 | 0.66 | 1.06 |
| 34 | 99  | 0.23 | 0.33 | 0.38 | 189 | 1.31 | 1.94 |
| 35 | 95  | 0.40 | 0.33 | 0.38 | 185 | 0.23 | 0.19 |
| 36 | 69  | 0.06 | 0.33 | 0.38 | 159 | 0.17 | 0.85 |
| 37 | 108 | 0.30 | 0.33 | 0.38 | 198 | 0.62 | 0.69 |
| 38 | 109 | 0.52 | 0.32 | 0.37 | 199 | 0.29 | 0.18 |
| 39 | 103 | 0.35 | 0.32 | 0.36 | 193 | 0.24 | 0.21 |
| 40 | 64  | 0.11 | 0.31 | 0.36 | 154 | 0.03 | 0.10 |
| 41 | 100 | 0.20 | 0.31 | 0.36 | 190 | 0.51 | 0.80 |
| 42 | 101 | 0.21 | 0.31 | 0.36 | 191 | 1.10 | 1.63 |
| 43 | 100 | 0.35 | 0.29 | 0.34 | 190 | 0.28 | 0.24 |
| 44 | 103 | 0.32 | 0.29 | 0.33 | 193 | 0.44 | 0.39 |
| 45 | 65  | 0.06 | 0.29 | 0.33 | 155 | 0.96 | 4.51 |
| 46 |     |      |      |      |     |      |      |
| 47 |     |      |      |      |     |      |      |
| 48 |     |      |      |      |     |      |      |
| 49 |     |      |      |      |     |      |      |
| 50 |     |      |      |      |     |      |      |
| 51 |     |      |      |      |     |      |      |
| 52 |     |      |      |      |     |      |      |
| 53 |     |      |      |      |     |      |      |
| 54 |     |      |      |      |     |      |      |
| 55 |     |      |      |      |     |      |      |
| 56 |     |      |      |      |     |      |      |
| 57 |     |      |      |      |     |      |      |
| 58 |     |      |      |      |     |      |      |
| 59 |     |      |      |      |     |      |      |
| 60 |     |      |      |      |     |      |      |

|    |     |      |      |      |     |      |      |
|----|-----|------|------|------|-----|------|------|
| 1  |     |      |      |      |     |      |      |
| 2  |     |      |      |      |     |      |      |
| 3  | 101 | 0.33 | 0.28 | 0.33 | 191 | 0.48 | 0.41 |
| 4  | 96  | 0.19 | 0.28 | 0.32 | 186 | 1.37 | 2.04 |
| 5  | 106 | 0.35 | 0.27 | 0.31 | 196 | 0.21 | 0.16 |
| 6  | 100 | 0.18 | 0.27 | 0.31 | 190 | 0.91 | 1.35 |
| 7  | 120 | 0.43 | 0.26 | 0.30 | 210 | 0.44 | 0.27 |
| 8  | 97  | 0.21 | 0.26 | 0.30 | 187 | 0.25 | 0.32 |
| 9  | 111 | 0.34 | 0.26 | 0.30 | 201 | 0.20 | 0.15 |
| 10 | 118 | 0.09 | 0.26 | 0.30 | 208 | 0.92 | 2.50 |
| 11 | 99  | 0.10 | 0.25 | 0.29 | 189 | 0.24 | 0.60 |
| 12 | 104 | 0.31 | 0.25 | 0.29 | 194 | 0.97 | 0.79 |
| 13 | 122 | 0.41 | 0.25 | 0.28 | 212 | 0.50 | 0.30 |
| 14 | 106 | 0.07 | 0.24 | 0.28 | 196 | 0.53 | 1.97 |
| 15 | 101 | 0.24 | 0.24 | 0.28 | 191 | 0.25 | 0.25 |
| 16 | 105 | 0.31 | 0.23 | 0.27 | 195 | 0.22 | 0.17 |
| 17 | 107 | 0.07 | 0.22 | 0.25 | 197 | 0.35 | 1.10 |
| 18 | 102 | 0.04 | 0.21 | 0.24 | 192 | 0.78 | 3.92 |
| 19 | 117 | 0.34 | 0.21 | 0.24 | 207 | 0.24 | 0.15 |
| 20 | 62  | 0.05 | 0.20 | 0.23 | 152 | 1.22 | 5.16 |
| 21 | 175 | 0.16 | 0.20 | 0.23 | NA  | NA   | NA   |
| 22 | 113 | 0.25 | 0.20 | 0.23 | 203 | 0.23 | 0.18 |
| 23 | 93  | 0.11 | 0.20 | 0.23 | 183 | 0.13 | 0.24 |
| 24 | 98  | 0.29 | 0.20 | 0.23 | 188 | 0.17 | 0.12 |
| 25 | 87  | 0.13 | 0.20 | 0.22 | 177 | 0.22 | 0.33 |
| 26 | 89  | 0.24 | 0.19 | 0.22 | 179 | 0.14 | 0.11 |
| 27 | 94  | 0.11 | 0.19 | 0.22 | 184 | 1.34 | 2.24 |
| 28 | 99  | 0.18 | 0.19 | 0.21 | 189 | 0.14 | 0.15 |
| 29 | 95  | 0.12 | 0.18 | 0.21 | 185 | 1.20 | 1.78 |
| 30 | 105 | 0.20 | 0.18 | 0.21 | 195 | 0.11 | 0.10 |
| 31 | 114 | 0.25 | 0.18 | 0.21 | 204 | 0.17 | 0.12 |
| 32 | 89  | 0.09 | 0.18 | 0.20 | 179 | 2.43 | 4.68 |
| 33 | 99  | 0.19 | 0.17 | 0.20 | 189 | 0.13 | 0.12 |
| 34 | 74  | 0.04 | 0.17 | 0.20 | 164 | 0.03 | 0.16 |
| 35 | 111 | 0.05 | 0.17 | 0.20 | 201 | 0.21 | 0.81 |
| 36 | 115 | 0.24 | 0.17 | 0.20 | 205 | 0.19 | 0.14 |
| 37 | 79  | 0.04 | 0.17 | 0.19 | 169 | 0.32 | 1.21 |
| 38 | 94  | 0.17 | 0.16 | 0.18 | 184 | 0.12 | 0.11 |
| 39 | 111 | 0.20 | 0.16 | 0.18 | 201 | 0.11 | 0.09 |
| 40 | 89  | 0.21 | 0.15 | 0.18 | 179 | 0.15 | 0.11 |
| 41 | 111 | 0.27 | 0.15 | 0.17 | 201 | 0.18 | 0.10 |
| 42 | 106 | 0.13 | 0.15 | 0.17 | 196 | 0.07 | 0.08 |
| 43 | 74  | 0.17 | 0.15 | 0.17 | 164 | 0.09 | 0.08 |
| 44 | 108 | 0.08 | 0.15 | 0.17 | 198 | 0.13 | 0.25 |
| 45 | 104 | 0.10 | 0.15 | 0.17 | 194 | 0.07 | 0.09 |
| 46 |     |      |      |      |     |      |      |
| 47 |     |      |      |      |     |      |      |
| 48 |     |      |      |      |     |      |      |
| 49 |     |      |      |      |     |      |      |
| 50 |     |      |      |      |     |      |      |
| 51 |     |      |      |      |     |      |      |
| 52 |     |      |      |      |     |      |      |
| 53 |     |      |      |      |     |      |      |
| 54 |     |      |      |      |     |      |      |
| 55 |     |      |      |      |     |      |      |
| 56 |     |      |      |      |     |      |      |
| 57 |     |      |      |      |     |      |      |
| 58 |     |      |      |      |     |      |      |
| 59 |     |      |      |      |     |      |      |
| 60 |     |      |      |      |     |      |      |

|    |     |      |      |      |     |      |      |
|----|-----|------|------|------|-----|------|------|
| 1  |     |      |      |      |     |      |      |
| 2  |     |      |      |      |     |      |      |
| 3  | 113 | 0.29 | 0.15 | 0.17 | 203 | 0.27 | 0.13 |
| 4  | 80  | 0.13 | 0.14 | 0.16 | NA  | NA   | NA   |
| 5  | 105 | 0.21 | 0.14 | 0.16 | 195 | 0.11 | 0.07 |
| 6  | 108 | 0.17 | 0.14 | 0.16 | 198 | 0.22 | 0.18 |
| 7  | 115 | 0.07 | 0.14 | 0.16 | 205 | 0.25 | 0.50 |
| 8  | 67  | 0.02 | 0.14 | 0.16 | 157 | 0.01 | 0.08 |
| 9  | 94  | 0.03 | 0.14 | 0.16 | 184 | 0.12 | 0.54 |
| 10 | 101 | 0.19 | 0.13 | 0.15 | 191 | 0.10 | 0.07 |
| 11 | 94  | 0.03 | 0.13 | 0.15 | 184 | 0.82 | 3.82 |
| 12 | 93  | 0.05 | 0.13 | 0.15 | 183 | 0.70 | 1.97 |
| 13 | 105 | 0.19 | 0.13 | 0.15 | 195 | 0.19 | 0.13 |
| 14 | 93  | 0.02 | 0.13 | 0.15 | 183 | 0.03 | 0.16 |
| 15 | 110 | 0.25 | 0.13 | 0.15 | 200 | 0.25 | 0.13 |
| 16 | 109 | 0.18 | 0.12 | 0.14 | 199 | 0.10 | 0.07 |
| 17 | 113 | 0.15 | 0.12 | 0.14 | 203 | 0.08 | 0.07 |
| 18 | 91  | 0.03 | 0.12 | 0.14 | 181 | 0.02 | 0.10 |
| 19 | 63  | 0.03 | 0.12 | 0.14 | 153 | 0.22 | 0.83 |
| 20 | 119 | 0.09 | 0.12 | 0.14 | 209 | 0.96 | 1.23 |
| 21 | 106 | 0.14 | 0.12 | 0.14 | 196 | 0.07 | 0.06 |
| 22 | 87  | 0.02 | 0.12 | 0.14 | 177 | 0.02 | 0.08 |
| 23 | 114 | 0.18 | 0.11 | 0.13 | 204 | 0.17 | 0.11 |
| 24 | 114 | 0.06 | 0.11 | 0.13 | 204 | 0.03 | 0.06 |
| 25 | 99  | 0.05 | 0.11 | 0.12 | 189 | 0.08 | 0.19 |
| 26 | 89  | 0.04 | 0.11 | 0.12 | 179 | 0.25 | 0.68 |
| 27 | 114 | 0.13 | 0.10 | 0.12 | 204 | 0.20 | 0.16 |
| 28 | 51  | 0.02 | 0.10 | 0.12 | 141 | 0.20 | 0.85 |
| 29 | 101 | 0.09 | 0.10 | 0.11 | 191 | 0.49 | 0.58 |
| 30 | 111 | 0.16 | 0.10 | 0.11 | 201 | 0.13 | 0.08 |
| 31 | 103 | 0.17 | 0.09 | 0.11 | 193 | 0.20 | 0.11 |
| 32 | 107 | 0.04 | 0.09 | 0.11 | 197 | 0.38 | 0.89 |
| 33 | 99  | 0.13 | 0.09 | 0.11 | NA  | NA   | NA   |
| 34 | 114 | 0.04 | 0.09 | 0.11 | NA  | NA   | NA   |
| 35 | 106 | 0.10 | 0.09 | 0.11 | 196 | 0.06 | 0.06 |
| 36 | 104 | 0.12 | 0.09 | 0.11 | 194 | 0.06 | 0.05 |
| 37 | 91  | 0.08 | 0.09 | 0.11 | 181 | 0.05 | 0.06 |
| 38 | 101 | 0.14 | 0.09 | 0.10 | NA  | NA   | NA   |
| 39 | 113 | 0.09 | 0.08 | 0.10 | 203 | 0.31 | 0.29 |
| 40 | 89  | 0.10 | 0.08 | 0.09 | 179 | 0.32 | 0.27 |
| 41 | 113 | 0.08 | 0.08 | 0.09 | 203 | 0.82 | 0.85 |
| 42 | 116 | 0.11 | 0.08 | 0.09 | 206 | 0.23 | 0.17 |
| 43 | 116 | 0.03 | 0.08 | 0.09 | NA  | NA   | NA   |
| 44 | 154 | 0.03 | 0.07 | 0.08 | 244 | 0.16 | 0.42 |
| 45 | 99  | 0.04 | 0.07 | 0.08 | 189 | 0.45 | 0.85 |
| 46 |     |      |      |      |     |      |      |
| 47 |     |      |      |      |     |      |      |
| 48 |     |      |      |      |     |      |      |
| 49 |     |      |      |      |     |      |      |
| 50 |     |      |      |      |     |      |      |
| 51 |     |      |      |      |     |      |      |
| 52 |     |      |      |      |     |      |      |
| 53 |     |      |      |      |     |      |      |
| 54 |     |      |      |      |     |      |      |
| 55 |     |      |      |      |     |      |      |
| 56 |     |      |      |      |     |      |      |
| 57 |     |      |      |      |     |      |      |
| 58 |     |      |      |      |     |      |      |
| 59 |     |      |      |      |     |      |      |
| 60 |     |      |      |      |     |      |      |

|    |     |      |      |         |     |      |      |
|----|-----|------|------|---------|-----|------|------|
| 1  |     |      |      |         |     |      |      |
| 2  |     |      |      |         |     |      |      |
| 3  | 101 | 0.07 | 0.07 | 0.08    | 191 | 0.03 | 0.03 |
| 4  | 102 | 0.10 | 0.07 | 0.08    | 192 | 0.70 | 0.49 |
| 5  | 106 | 0.10 | 0.06 | 0.07    | 196 | 0.06 | 0.04 |
| 6  | 87  | 0.09 | 0.06 | 0.07    | 177 | 0.04 | 0.03 |
| 7  | 97  | 0.08 | 0.06 | 0.07    | 187 | 0.09 | 0.07 |
| 8  | 80  | 0.01 | 0.06 | 0.07    | 170 | 0.04 | 0.19 |
| 9  | 99  | 0.03 | 0.06 | 0.07    | 189 | 0.01 | 0.02 |
| 10 | 100 | 0.01 | 0.06 | 0.07    | 190 | 0.01 | 0.05 |
| 11 | 103 | 0.01 | 0.06 | 0.06    | 193 | 0.67 | 2.79 |
| 12 | 108 | 0.05 | 0.05 | 0.06    | 198 | 0.03 | 0.03 |
| 13 | 101 | 0.01 | 0.05 | 0.06 NA | NA  | NA   |      |
| 14 | 100 | 0.01 | 0.05 | 0.06    | 190 | 0.21 | 1.06 |
| 15 | 89  | 0.02 | 0.05 | 0.06    | 179 | 0.10 | 0.25 |
| 16 | 108 | 0.01 | 0.05 | 0.06    | 198 | 0.01 | 0.04 |
| 17 | 93  | 0.01 | 0.05 | 0.05    | 183 | 0.14 | 0.67 |
| 18 | 92  | 0.06 | 0.04 | 0.05    | 182 | 0.03 | 0.02 |
| 19 | 93  | 0.01 | 0.04 | 0.05    | 183 | 0.08 | 0.22 |
| 20 | 93  | 0.01 | 0.04 | 0.04    | 183 | 0.03 | 0.18 |
| 21 | 116 | 0.02 | 0.04 | 0.04    | 206 | 0.03 | 0.06 |
| 22 | 93  | 0.05 | 0.04 | 0.04    | 183 | 0.08 | 0.06 |
| 23 | 102 | 0.03 | 0.04 | 0.04    | 192 | 0.05 | 0.06 |
| 24 | 115 | 0.06 | 0.03 | 0.04    | 205 | 0.03 | 0.02 |
| 25 | 105 | 0.01 | 0.03 | 0.04    | 195 | 0.35 | 1.64 |
| 26 | 97  | 0.01 | 0.03 | 0.03    | 187 | 0.01 | 0.02 |
| 27 | 89  | 0.01 | 0.03 | 0.03    | 179 | 0.39 | 1.67 |
| 28 | 116 | 0.02 | 0.03 | 0.03    | 206 | 0.09 | 0.16 |
| 29 | 48  | 0.01 | 0.03 | 0.03    | 138 | 0.02 | 0.09 |
| 30 | 101 | 0.02 | 0.03 | 0.03    | 191 | 0.60 | 0.80 |
| 31 | 95  | 0.03 | 0.03 | 0.03    | 185 | 0.19 | 0.17 |
| 32 | 101 | 0.01 | 0.03 | 0.03    | 191 | 0.00 | 0.01 |
| 33 | 108 | 0.01 | 0.03 | 0.03    | 198 | 0.01 | 0.01 |
| 34 | 106 | 0.01 | 0.02 | 0.03 NA | NA  | NA   |      |
| 35 | 108 | 0.03 | 0.02 | 0.03    | 198 | 0.05 | 0.04 |
| 36 | 49  | 0.01 | 0.02 | 0.02    | 139 | 0.01 | 0.03 |
| 37 | 45  | 0.02 | 0.02 | 0.02 NA | NA  | NA   |      |
| 38 | 89  | 0.02 | 0.02 | 0.02    | 179 | 0.01 | 0.01 |
| 39 | 105 | 0.01 | 0.02 | 0.02    | 195 | 0.07 | 0.15 |
| 40 | 88  | 0.00 | 0.02 | 0.02    | 178 | 0.36 | 1.92 |
| 41 | 105 | 0.02 | 0.02 | 0.02 NA | NA  | NA   |      |
| 42 | 107 | 0.01 | 0.02 | 0.02    | 197 | 0.04 | 0.06 |
| 43 | 105 | 0.02 | 0.02 | 0.02    | 195 | 0.01 | 0.01 |
| 44 | 99  | 0.00 | 0.02 | 0.02    | 189 | 0.01 | 0.04 |
| 45 | 107 | 0.01 | 0.02 | 0.02    | 197 | 0.01 | 0.02 |
| 46 |     |      |      |         |     |      |      |
| 47 |     |      |      |         |     |      |      |
| 48 |     |      |      |         |     |      |      |
| 49 |     |      |      |         |     |      |      |
| 50 |     |      |      |         |     |      |      |
| 51 |     |      |      |         |     |      |      |
| 52 |     |      |      |         |     |      |      |
| 53 |     |      |      |         |     |      |      |
| 54 |     |      |      |         |     |      |      |
| 55 |     |      |      |         |     |      |      |
| 56 |     |      |      |         |     |      |      |
| 57 |     |      |      |         |     |      |      |
| 58 |     |      |      |         |     |      |      |
| 59 |     |      |      |         |     |      |      |
| 60 |     |      |      |         |     |      |      |

|    |     |      |      |      |     |      |      |
|----|-----|------|------|------|-----|------|------|
| 1  |     |      |      |      |     |      |      |
| 2  |     |      |      |      |     |      |      |
| 3  | 91  | 0.02 | 0.02 | 0.02 | 181 | 0.01 | 0.01 |
| 4  | 98  | 0.02 | 0.02 | 0.02 | 188 | 0.01 | 0.01 |
| 5  | 90  | 0.00 | 0.01 | 0.02 | NA  | NA   | NA   |
| 6  | 136 | 0.01 | 0.01 | 0.02 | 226 | 0.01 | 0.01 |
| 7  | 98  | 0.01 | 0.01 | 0.02 | 188 | 0.20 | 0.35 |
| 8  | 95  | 0.00 | 0.01 | 0.01 | 185 | 0.09 | 0.53 |
| 9  | 99  | 0.00 | 0.01 | 0.01 | 189 | 0.01 | 0.03 |
| 10 | 35  | 0.00 | 0.01 | 0.01 | 125 | 0.00 | 0.01 |
| 11 | 125 | 0.01 | 0.01 | 0.01 | 215 | 0.01 | 0.01 |
| 12 | 142 | 0.02 | 0.01 | 0.01 | 232 | 0.01 | 0.01 |
| 13 | 40  | 0.00 | 0.01 | 0.01 | 130 | 0.01 | 0.06 |
| 14 | 175 | 0.01 | 0.01 | 0.01 | NA  | NA   | NA   |
| 15 | 99  | 0.00 | 0.01 | 0.01 | 189 | 0.00 | 0.00 |
| 16 | 103 | 0.00 | 0.01 | 0.01 | 193 | 0.01 | 0.06 |
| 17 | 95  | 0.00 | 0.01 | 0.01 | NA  | NA   | NA   |
| 18 | 94  | 0.00 | 0.01 | 0.01 | 184 | 0.01 | 0.02 |
| 19 | 97  | 0.00 | 0.01 | 0.01 | 187 | 0.00 | 0.01 |
| 20 | 97  | 0.00 | 0.00 | 0.00 | 187 | 0.00 | 0.00 |
| 21 | 125 | 0.00 | 0.00 | 0.00 | 215 | 0.00 | 0.00 |
| 22 | 76  | 0.00 | 0.00 | 0.00 | NA  | NA   | NA   |
| 23 | 144 | 0.00 | 0.00 | 0.00 | NA  | NA   | NA   |
| 24 | 144 | 0.00 | 0.00 | 0.00 | NA  | NA   | NA   |
| 25 | 144 | 0.00 | 0.00 | 0.00 | NA  | NA   | NA   |
| 26 | 144 | 0.00 | 0.00 | 0.00 | NA  | NA   | NA   |
| 27 | 95  | 0.00 | 0.00 | 0.00 | 185 | 0.00 | 0.00 |
| 28 | 162 | 0.00 | 0.00 | 0.00 | NA  | NA   | NA   |
| 29 | 144 | 0.00 | 0.00 | 0.00 | NA  | NA   | NA   |
| 30 | 144 | 0.00 | 0.00 | 0.00 | NA  | NA   | NA   |
| 31 | 144 | 0.00 | 0.00 | 0.00 | NA  | NA   | NA   |
| 32 | 144 | 0.00 | 0.00 | 0.00 | NA  | NA   | NA   |
| 33 | 144 | 0.00 | 0.00 | 0.00 | NA  | NA   | NA   |
| 34 | 144 | 0.00 | 0.00 | 0.00 | NA  | NA   | NA   |
| 35 | 144 | 0.00 | 0.00 | 0.00 | NA  | NA   | NA   |
| 36 | 144 | 0.00 | 0.00 | 0.00 | NA  | NA   | NA   |
| 37 | 144 | 0.00 | 0.00 | 0.00 | NA  | NA   | NA   |
| 38 | 144 | 0.00 | 0.00 | 0.00 | NA  | NA   | NA   |
| 39 | 139 | 0.00 | 0.00 | 0.00 | NA  | NA   | NA   |
| 40 | 144 | 0.00 | 0.00 | 0.00 | NA  | NA   | NA   |
| 41 | 144 | 0.00 | 0.00 | 0.00 | NA  | NA   | NA   |
| 42 | 144 | 0.00 | 0.00 | 0.00 | NA  | NA   | NA   |
| 43 | 142 | 0.00 | 0.00 | 0.00 | NA  | NA   | NA   |
| 44 | 144 | 0.00 | 0.00 | 0.00 | NA  | NA   | NA   |
| 45 | 136 | 0.00 | 0.00 | 0.00 | NA  | NA   | NA   |
| 46 | 144 | 0.00 | 0.00 | 0.00 | NA  | NA   | NA   |
| 47 | 144 | 0.00 | 0.00 | 0.00 | NA  | NA   | NA   |
| 48 | 144 | 0.00 | 0.00 | 0.00 | NA  | NA   | NA   |
| 49 | 162 | 0.00 | 0.00 | 0.00 | NA  | NA   | NA   |
| 50 | 144 | 0.00 | 0.00 | 0.00 | NA  | NA   | NA   |
| 51 | 144 | 0.00 | 0.00 | 0.00 | NA  | NA   | NA   |
| 52 | 144 | 0.00 | 0.00 | 0.00 | NA  | NA   | NA   |
| 53 | 144 | 0.00 | 0.00 | 0.00 | NA  | NA   | NA   |
| 54 | 144 | 0.00 | 0.00 | 0.00 | NA  | NA   | NA   |
| 55 | 144 | 0.00 | 0.00 | 0.00 | NA  | NA   | NA   |
| 56 | 142 | 0.00 | 0.00 | 0.00 | NA  | NA   | NA   |
| 57 | 123 | 0.00 | 0.00 | 0.00 | NA  | NA   | NA   |
| 58 | 136 | 0.00 | 0.00 | 0.00 | NA  | NA   | NA   |
| 59 |     |      |      |      |     |      |      |
| 60 |     |      |      |      |     |      |      |

1  
2  
3  
4  
5  
6  
7  
8  
9  
10  
11  
12  
13  
14  
15  
16  
17  
18  
19  
20  
21  
22  
23  
24  
25  
26  
27  
28  
29  
30  
31  
32  
33  
34  
35  
36  
37  
38  
39  
40  
41  
42  
43  
44  
45  
46  
47  
48  
49  
50  
51  
52  
53  
54  
55  
56  
57  
58  
59  
60

|    |     |      |      |      |    |     |      |
|----|-----|------|------|------|----|-----|------|
|    | 144 | 0.00 | 0.00 | 0.00 | NA | NA  | NA   |
|    | 144 | 0.00 | 0.00 | 0.00 | NA | NA  | NA   |
|    | 136 | 0.00 | 0.00 | 0.00 | NA | NA  | NA   |
|    | 144 | 0.00 | 0.00 | 0.00 | NA | NA  | NA   |
|    | 135 | 0.00 | 0.00 | 0.00 | NA | NA  | NA   |
|    | 103 | 2.39 | NA   | NA   |    | 193 | 1.30 |
|    | 88  | 0.60 | NA   | NA   | NA | NA  | NA   |
|    | 111 | 0.05 | NA   | NA   | NA | NA  | NA   |
|    | 93  | 1.11 | NA   | NA   | NA | NA  | NA   |
| NA | NA  | NA   | NA   | NA   | NA | NA  | NA   |
|    | 91  | 0.11 | NA   | NA   | NA | NA  | NA   |
|    | 96  | 0.30 | NA   | NA   | NA | NA  | NA   |
|    | 79  | 0.47 | NA   | NA   |    | 169 | 0.27 |
|    | 93  | 0.14 | NA   | NA   | NA | NA  | NA   |
|    | 70  | 1.05 | NA   | NA   | NA | NA  | NA   |
|    | 119 | 3.81 | NA   | NA   |    | 209 | 2.36 |
|    | 93  | 1.38 | NA   | NA   | NA | NA  | NA   |
|    | 90  | 0.21 | NA   | NA   | NA | NA  | NA   |
|    | 76  | 0.16 | NA   | NA   | NA | NA  | NA   |



1  
2  
3  
4  
5  
6  
7  
8  
9  
10  
11  
12  
13  
14  
15  
16  
17  
18  
19  
20  
21  
22  
23  
24  
25  
26  
27  
28  
29  
30  
31  
32  
33  
34  
35  
36  
37  
38  
39  
40  
41  
42  
43  
44  
45  
46  
47  
48  
49  
50  
51  
52  
53  
54  
55  
56  
57  
58  
59  
60

| ISCDR_Proj | 2020_e0_M | 2020_e0_F | Diff_e0_M | Diff_e0_F   |
|------------|-----------|-----------|-----------|-------------|
|            | 5.02 NA   | NA        | NA        | NA          |
|            | 6.78 NA   | NA        | NA        | NA          |
|            | 3.09      | 75.4      | 80.5      | -2.23 -1.93 |
|            | 2.88      | 75.9      | 81.1      | -2.19 -1.99 |
|            | 2.80 NA   | NA        | NA        | NA          |
|            | 3.33 NA   | NA        | NA        | NA          |
|            | 2.79 NA   | NA        | NA        | NA          |
|            | 3.55 NA   | NA        | NA        | NA          |
|            | 2.58      | 75.6      | 81.1      | -1.80 -1.61 |
|            | 2.55 NA   | NA        | NA        | NA          |
|            | 2.97 NA   | NA        | NA        | NA          |
|            | 2.10      | 76.2      | 81.6      | -1.53 -1.38 |
|            | 2.16      | 73.5      | 79.7      | -1.39 -1.44 |
|            | 3.47 NA   | NA        | NA        | NA          |
|            | 3.66 NA   | NA        | NA        | NA          |
|            | 1.83      | 73.8      | 85.0      | -0.96 -1.38 |
|            | 2.50 NA   | NA        | NA        | NA          |
|            | 3.49 NA   | NA        | NA        | NA          |
|            | 2.02      | 78.7      | 84.5      | -1.81 -1.66 |
|            | 1.87      | 75.0      | 86.0      | -1.13 -1.68 |
|            | 3.19 NA   | NA        | NA        | NA          |
|            | 2.16      | 75.8      | 80.8      | -1.45 -1.30 |
|            | 3.26 NA   | NA        | NA        | NA          |
|            | 1.78      | 72.6      | 78.3      | -1.07 -0.98 |
|            | 3.60 NA   | NA        | NA        | NA          |
|            | 3.43 NA   | NA        | NA        | NA          |
|            | 1.93      | 76.6      | 83.9      | -1.44 -1.33 |
|            | 1.67      | 73.9      | 85.5      | -0.86 -1.40 |
|            | 2.52 NA   | NA        | NA        | NA          |
|            | 1.26      | 78.6      | 83.2      | -0.95 -0.84 |
|            | 2.70 NA   | NA        | NA        | NA          |
|            | 2.63 NA   | NA        | NA        | NA          |
|            | 2.98 NA   | NA        | NA        | NA          |
|            | 3.26 NA   | NA        | NA        | NA          |
|            | 4.39 NA   | NA        | NA        | NA          |
|            | 3.05 NA   | NA        | NA        | NA          |
|            | 1.11      | 74.8      | 79.8      | -0.73 -0.67 |
|            | 3.80      | 72.1      | 77.7      | -2.15 -1.97 |
|            | 0.76      | 74.7      | 86.4      | -0.42 -0.67 |
|            | 1.87 NA   | NA        | NA        | NA          |
|            | 1.12      | 75.6      | 81.0      | -0.80 -0.77 |
|            | 2.49 NA   | NA        | NA        | NA          |

|    |    |      |      |      |       |       |
|----|----|------|------|------|-------|-------|
| 1  |    |      |      |      |       |       |
| 2  |    |      |      |      |       |       |
| 3  |    | 0.97 | 75.0 | 86.5 | -0.53 | -0.83 |
| 4  |    | 1.23 | 75.8 | 80.9 | -0.87 | -0.80 |
| 5  |    | 4.32 | 71.8 | 77.6 | -2.72 | -2.44 |
| 6  |    | 3.00 | NA   | NA   | NA    | NA    |
| 7  |    | NA   | NA   | NA   | NA    | NA    |
| 8  | NA | NA   | NA   | NA   | NA    | NA    |
| 9  |    | 1.04 | 75.2 | 80.7 | -0.69 | -0.66 |
| 10 |    | 1.00 | 73.7 | 85.8 | -0.53 | -0.83 |
| 11 |    | 1.06 | 78.9 | 82.4 | -0.86 | -0.71 |
| 12 |    | 2.64 | NA   | NA   | NA    | NA    |
| 13 |    | 1.12 | 78.8 | 84.5 | -0.94 | -0.84 |
| 14 |    | 2.45 | 71.0 | 78.2 | -1.41 | -1.47 |
| 15 |    | 3.19 | NA   | NA   | NA    | NA    |
| 16 |    | 1.05 | 79.8 | 85.1 | -0.99 | -0.88 |
| 17 |    | 2.19 | NA   | NA   | NA    | NA    |
| 18 |    | 0.55 | 67.9 | 72.6 | -0.16 | -0.34 |
| 19 |    | 2.77 | NA   | NA   | NA    | NA    |
| 20 |    | 1.06 | 80.0 | 85.7 | -1.00 | -0.90 |
| 21 |    | 2.59 | 70.9 | 76.7 | -1.44 | -1.29 |
| 22 |    | 2.94 | NA   | NA   | NA    | NA    |
| 23 |    | 1.01 | 74.9 | 80.3 | -0.66 | -0.63 |
| 24 |    | 1.11 | 79.0 | 84.6 | -0.94 | -0.87 |
| 25 |    | 2.58 | NA   | NA   | NA    | NA    |
| 26 |    | 0.84 | 80.5 | 84.1 | -0.70 | -0.59 |
| 27 |    | 3.29 | 75.7 | 80.6 | -2.27 | -1.99 |
| 28 |    | 1.33 | 71.6 | 77.6 | -0.68 | -0.67 |
| 29 |    | 0.83 | 74.1 | 79.4 | -0.50 | -0.50 |
| 30 |    | 0.78 | 80.2 | 85.7 | -0.70 | -0.66 |
| 31 |    | 0.70 | 74.0 | 86.1 | -0.37 | -0.61 |
| 32 |    | 2.18 | NA   | NA   | NA    | NA    |
| 33 |    | 0.79 | 79.7 | 85.8 | -0.73 | -0.66 |
| 34 |    | 0.76 | 80.2 | 83.5 | -0.64 | -0.52 |
| 35 |    | 3.32 | NA   | NA   | NA    | NA    |
| 36 |    | 3.14 | NA   | NA   | NA    | NA    |
| 37 |    | 2.45 | NA   | NA   | NA    | NA    |
| 38 |    | 2.60 | NA   | NA   | NA    | NA    |
| 39 |    | 3.63 | NA   | NA   | NA    | NA    |
| 40 |    | 3.12 | NA   | NA   | NA    | NA    |
| 41 |    | 0.78 | 77.3 | 82.0 | -0.60 | -0.56 |
| 42 |    | 0.91 | 75.8 | 80.8 | -0.70 | -0.66 |
| 43 |    | 3.63 | NA   | NA   | NA    | NA    |
| 44 |    | 0.72 | 80.5 | 85.7 | -0.67 | -0.61 |
| 45 |    | 1.08 | 74.5 | 79.7 | -0.71 | -0.65 |
| 46 |    | 5.64 | 56.9 | 58.9 | -1.12 | -1.35 |
| 47 |    |      |      |      |       |       |
| 48 |    |      |      |      |       |       |
| 49 |    |      |      |      |       |       |
| 50 |    |      |      |      |       |       |
| 51 |    |      |      |      |       |       |
| 52 |    |      |      |      |       |       |
| 53 |    |      |      |      |       |       |
| 54 |    |      |      |      |       |       |
| 55 |    |      |      |      |       |       |
| 56 |    |      |      |      |       |       |
| 57 |    |      |      |      |       |       |
| 58 |    |      |      |      |       |       |
| 59 |    |      |      |      |       |       |
| 60 |    |      |      |      |       |       |

|    |      |      |      |       |       |
|----|------|------|------|-------|-------|
| 1  |      |      |      |       |       |
| 2  |      |      |      |       |       |
| 3  | 2.58 | 73.8 | 76.0 | -1.05 | -0.69 |
| 4  | 0.75 | 80.8 | 85.0 | -0.70 | -0.63 |
| 5  | 2.25 | NA   | NA   | NA    | NA    |
| 6  | 0.57 | 73.0 | 85.4 | -0.27 | -0.45 |
| 7  | 0.67 | NA   | NA   | NA    | NA    |
| 8  | 0.99 | 75.7 | 81.3 | -0.63 | -0.61 |
| 9  | 0.61 | 78.0 | 82.5 | -0.46 | -0.44 |
| 10 | 0.55 | 80.3 | 83.7 | -0.47 | -0.39 |
| 11 | 2.83 | NA   | NA   | NA    | NA    |
| 12 | 0.56 | 79.3 | 85.1 | -0.54 | -0.54 |
| 13 | 2.49 | NA   | NA   | NA    | NA    |
| 14 | NA   | NA   | NA   | NA    | NA    |
| 15 | 2.58 | 67.5 | 73.1 | -1.42 | -1.60 |
| 16 | 0.71 | 74.7 | 80.7 | -0.49 | -0.50 |
| 17 | 2.04 | 74.0 | 80.2 | -1.68 | -1.63 |
| 18 | 2.38 | 74.3 | 77.0 | -1.39 | -1.03 |
| 19 | 2.16 | NA   | NA   | NA    | NA    |
| 20 | 1.03 | 76.3 | 81.7 | -0.82 | -0.77 |
| 21 | 0.76 | 71.1 | 78.2 | -0.32 | -0.37 |
| 22 | 0.42 | 73.7 | 86.4 | -0.21 | -0.38 |
| 23 | 0.61 | 74.2 | 79.4 | -0.38 | -0.38 |
| 24 | 0.64 | 65.0 | 69.0 | -0.22 | -0.46 |
| 25 | 0.51 | 76.6 | 81.3 | -0.37 | -0.37 |
| 26 | NA   | NA   | NA   | NA    | NA    |
| 27 | 0.61 | 80.3 | 85.7 | -0.58 | -0.53 |
| 28 | 0.45 | 76.6 | 81.4 | -0.31 | -0.32 |
| 29 | 4.25 | 67.0 | 71.4 | -1.62 | -1.39 |
| 30 | 0.74 | 72.5 | 78.1 | -0.40 | -0.41 |
| 31 | 1.53 | 73.2 | 77.4 | -0.70 | -0.60 |
| 32 | 1.47 | 67.3 | 75.6 | -0.46 | -0.58 |
| 33 | 3.11 | 74.9 | 77.3 | -1.69 | -1.20 |
| 34 | 0.50 | 79.5 | 85.4 | -0.43 | -0.41 |
| 35 | 0.38 | 73.3 | 85.3 | -0.19 | -0.31 |
| 36 | 0.43 | 80.3 | 84.1 | -0.38 | -0.37 |
| 37 | 2.88 | 71.5 | 76.2 | -1.67 | -1.55 |
| 38 | 0.63 | 75.5 | 80.6 | -0.44 | -0.43 |
| 39 | 1.70 | 78.1 | 81.0 | -1.25 | -1.14 |
| 40 | 2.40 | NA   | NA   | NA    | NA    |
| 41 | 1.48 | NA   | NA   | NA    | NA    |
| 42 | 2.03 | NA   | NA   | NA    | NA    |
| 43 | 3.52 | 72.5 | 75.8 | -1.58 | -1.17 |
| 44 | 0.35 | 80.0 | 84.2 | -0.28 | -0.27 |
| 45 | 3.13 | NA   | NA   | NA    | NA    |
| 46 |      |      |      |       |       |
| 47 |      |      |      |       |       |
| 48 |      |      |      |       |       |
| 49 |      |      |      |       |       |
| 50 |      |      |      |       |       |
| 51 |      |      |      |       |       |
| 52 |      |      |      |       |       |
| 53 |      |      |      |       |       |
| 54 |      |      |      |       |       |
| 55 |      |      |      |       |       |
| 56 |      |      |      |       |       |
| 57 |      |      |      |       |       |
| 58 |      |      |      |       |       |
| 59 |      |      |      |       |       |
| 60 |      |      |      |       |       |

|    |    |      |      |      |       |       |
|----|----|------|------|------|-------|-------|
| 1  |    |      |      |      |       |       |
| 2  |    |      |      |      |       |       |
| 3  |    | 0.34 | 74.3 | 85.9 | -0.18 | -0.29 |
| 4  |    | 2.28 | 75.0 | 79.2 | -1.30 | -1.28 |
| 5  |    | 2.33 | NA   | NA   | NA    | NA    |
| 6  |    | 0.33 | 72.9 | 85.7 | -0.16 | -0.28 |
| 7  |    | 0.36 | 81.7 | 85.4 | -0.34 | -0.32 |
| 8  |    | 0.48 | 74.7 | 79.9 | -0.31 | -0.32 |
| 9  |    |      |      |      |       |       |
| 10 |    |      |      |      |       |       |
| 11 | NA | NA   | NA   | NA   | NA    | NA    |
| 12 |    | 0.47 | 80.6 | 85.7 | -0.43 | -0.40 |
| 13 |    | 0.47 | 78.3 | 83.1 | -0.42 | -0.42 |
| 14 |    | 2.65 | NA   | NA   | NA    | NA    |
| 15 |    | 1.15 | 63.1 | 65.9 | -0.34 | -0.78 |
| 16 |    | 0.49 | 77.1 | 81.5 | -0.34 | -0.34 |
| 17 |    | 0.48 | 77.5 | 82.1 | -0.41 | -0.40 |
| 18 |    | 0.49 | 74.1 | 79.6 | -0.31 | -0.32 |
| 19 |    | 0.42 | 80.5 | 85.5 | -0.38 | -0.37 |
| 20 |    | 0.54 | 77.1 | 79.2 | -0.34 | -0.28 |
| 21 |    | 0.42 | 75.3 | 80.3 | -0.27 | -0.28 |
| 22 |    | 6.48 | 50.6 | 54.3 | -0.73 | -1.40 |
| 23 |    | 1.99 | NA   | NA   | NA    | NA    |
| 24 |    | 1.94 | 69.9 | 76.2 | -1.21 | -1.30 |
| 25 |    | 3.15 | 69.7 | 75.7 | -1.82 | -1.62 |
| 26 |    | 0.35 | 72.4 | 84.6 | -0.16 | -0.26 |
| 27 |    | 0.33 | 72.8 | 77.8 | -0.18 | -0.21 |
| 28 |    | 2.35 | 73.2 | 78.8 | -1.53 | -1.34 |
| 29 |    | 0.37 | 76.9 | 81.4 | -0.26 | -0.28 |
| 30 |    | 0.88 | 76.4 | 82.0 | -0.75 | -0.74 |
| 31 |    | 0.78 | 63.4 | 66.0 | -0.24 | -0.64 |
| 32 |    | 0.25 | 73.4 | 86.3 | -0.12 | -0.22 |
| 33 |    | 0.47 | 76.4 | 81.7 | -0.31 | -0.34 |
| 34 |    | 1.68 | NA   | NA   | NA    | NA    |
| 35 |    | 1.22 | 74.2 | 80.0 | -0.69 | -0.70 |
| 36 |    | 2.23 | NA   | NA   | NA    | NA    |
| 37 |    | 0.22 | 77.3 | 82.0 | -0.16 | -0.19 |
| 38 |    | 0.98 | 56.4 | 59.8 | -0.17 | -0.69 |
| 39 |    | 0.79 | 76.0 | 80.9 | -0.57 | -0.55 |
| 40 |    | 0.20 | 79.1 | 84.8 | -0.15 | -0.16 |
| 41 |    | 0.24 | 73.6 | 78.5 | -0.15 | -0.18 |
| 42 |    | 0.11 | 77.7 | 80.9 | -0.06 | -0.10 |
| 43 |    | 0.91 | NA   | NA   | NA    | NA    |
| 44 |    | 1.87 | NA   | NA   | NA    | NA    |
| 45 |    | 0.27 | 76.1 | 80.8 | -0.18 | -0.21 |
| 46 |    | 0.45 | 73.5 | 78.6 | -0.26 | -0.27 |
| 47 |    | 5.18 | 63.3 | 66.7 | -1.25 | -1.29 |
| 48 |    |      |      |      |       |       |
| 49 |    |      |      |      |       |       |
| 50 |    |      |      |      |       |       |
| 51 |    |      |      |      |       |       |
| 52 |    |      |      |      |       |       |
| 53 |    |      |      |      |       |       |
| 54 |    |      |      |      |       |       |
| 55 |    |      |      |      |       |       |
| 56 |    |      |      |      |       |       |
| 57 |    |      |      |      |       |       |
| 58 |    |      |      |      |       |       |
| 59 |    |      |      |      |       |       |
| 60 |    |      |      |      |       |       |

|    |    |      |      |      |       |       |
|----|----|------|------|------|-------|-------|
| 1  |    |      |      |      |       |       |
| 2  |    |      |      |      |       |       |
| 3  |    | 0.47 | 73.3 | 78.5 | -0.27 | -0.29 |
| 4  |    | 2.34 | NA   | NA   | NA    |       |
| 5  |    | 0.19 | 73.7 | 85.5 | -0.09 | -0.15 |
| 6  |    | 1.55 | NA   | NA   | NA    |       |
| 7  |    | 0.31 | 79.9 | 85.3 | -0.28 | -0.27 |
| 8  |    | 0.36 | 77.3 | 81.2 | -0.26 | -0.25 |
| 9  |    | 0.17 | 79.0 | 82.8 | -0.13 | -0.14 |
| 10 |    | 2.87 | 68.8 | 73.5 | -1.12 | -1.01 |
| 11 |    | 0.68 | 69.4 | 76.0 | -0.26 | -0.36 |
| 12 |    | 0.90 | 72.3 | 79.2 | -0.43 | -0.43 |
| 13 |    | 0.35 | 80.0 | 85.3 | -0.32 | -0.30 |
| 14 |    | 2.26 | 63.8 | 67.9 | -0.71 | -0.83 |
| 15 |    | 0.29 | 67.1 | 77.7 | -0.10 | -0.17 |
| 16 |    | 0.19 | 76.7 | 81.7 | -0.14 | -0.17 |
| 17 |    | 1.27 | 65.9 | 67.6 | -0.50 | -0.86 |
| 18 |    | 4.50 | 57.2 | 59.6 | -1.04 | -1.28 |
| 19 |    | 0.17 | 79.0 | 83.7 | -0.14 | -0.14 |
| 20 |    | 5.92 | 61.4 | 64.9 | -1.33 | -1.41 |
| 21 | NA | NA   | NA   | NA   | NA    |       |
| 22 |    | 0.21 | 72.9 | 85.0 | -0.10 | -0.19 |
| 23 |    | 0.28 | 71.6 | 76.0 | -0.12 | -0.14 |
| 24 |    | 0.14 | 76.0 | 81.0 | -0.09 | -0.13 |
| 25 |    | 0.38 | 75.7 | 78.1 | -0.21 | -0.18 |
| 26 |    | 0.13 | 78.1 | 83.1 | -0.08 | -0.15 |
| 27 |    | 2.57 | 67.5 | 76.8 | -1.16 | -1.19 |
| 28 |    | 0.17 | 72.1 | 82.8 | -0.07 | -0.11 |
| 29 |    | 2.05 | NA   | NA   | NA    |       |
| 30 |    | 0.11 | 75.0 | 79.9 | -0.06 | -0.09 |
| 31 |    | 0.14 | 79.3 | 83.9 | -0.11 | -0.12 |
| 32 |    | 5.37 | 66.8 | 73.4 | -1.82 | -1.78 |
| 33 |    | 0.13 | 77.3 | 81.3 | -0.09 | -0.13 |
| 34 |    | 0.18 | 54.1 | 55.0 | -0.03 | -0.81 |
| 35 |    | 0.94 | 63.3 | 66.7 | -0.35 | -0.67 |
| 36 |    | 0.16 | 78.2 | 84.1 | -0.12 | -0.13 |
| 37 |    | 1.39 | 55.8 | 64.1 | -0.23 | -0.63 |
| 38 |    | 0.13 | 69.7 | 79.5 | -0.05 | -0.08 |
| 39 |    | 0.10 | 73.3 | 80.3 | -0.05 | -0.08 |
| 40 |    | 0.13 | 72.4 | 77.8 | -0.07 | -0.11 |
| 41 |    | 0.12 | 80.0 | 85.9 | -0.11 | -0.12 |
| 42 |    | 0.09 | 81.4 | 84.5 | -0.08 | -0.09 |
| 43 |    | 0.09 | 76.8 | 81.3 | -0.06 | -0.11 |
| 44 |    | 0.28 | 70.4 | 75.3 | -0.12 | -0.27 |
| 45 |    | 0.11 | 77.0 | 83.5 | -0.06 | -0.14 |
| 46 |    |      |      |      |       |       |
| 47 |    |      |      |      |       |       |
| 48 |    |      |      |      |       |       |
| 49 |    |      |      |      |       |       |
| 50 |    |      |      |      |       |       |
| 51 |    |      |      |      |       |       |
| 52 |    |      |      |      |       |       |
| 53 |    |      |      |      |       |       |
| 54 |    |      |      |      |       |       |
| 55 |    |      |      |      |       |       |
| 56 |    |      |      |      |       |       |
| 57 |    |      |      |      |       |       |
| 58 |    |      |      |      |       |       |
| 59 |    |      |      |      |       |       |
| 60 |    |      |      |      |       |       |

|    |    |      |      |      |       |       |
|----|----|------|------|------|-------|-------|
| 1  |    |      |      |      |       |       |
| 2  |    |      |      |      |       |       |
| 3  |    | 0.15 | 81.3 | 86.1 | -0.14 | -0.15 |
| 4  |    |      |      |      |       |       |
| 5  | NA | NA   | NA   | NA   | NA    |       |
| 6  |    | 0.08 | 79.2 | 84.8 | -0.06 | -0.07 |
| 7  |    | 0.21 | 77.1 | 81.7 | -0.15 | -0.18 |
| 8  |    |      |      |      |       |       |
| 9  |    | 0.57 | 75.4 | 77.9 | -0.40 | -0.43 |
| 10 |    | 0.09 | 53.0 | 55.1 | -0.02 | -0.85 |
| 11 |    | 0.62 | 63.0 | 65.7 | -0.17 | -0.44 |
| 12 |    | 0.08 | 74.4 | 82.7 | -0.05 | -0.06 |
| 13 |    |      |      |      |       |       |
| 14 |    | 4.38 | 64.7 | 69.0 | -1.30 | -1.19 |
| 15 |    | 2.26 | 66.9 | 74.9 | -0.60 | -0.81 |
| 16 |    | 0.15 | 76.6 | 83.5 | -0.11 | -0.15 |
| 17 |    | 0.19 | 58.8 | 59.7 | -0.05 | -0.73 |
| 18 |    | 0.15 | 80.0 | 85.7 | -0.12 | -0.13 |
| 19 |    |      |      |      |       |       |
| 20 |    | 0.08 | 78.7 | 84.1 | -0.06 | -0.07 |
| 21 |    |      |      |      |       |       |
| 22 |    | 0.08 | 80.6 | 84.4 | -0.06 | -0.07 |
| 23 |    | 0.11 | 62.8 | 65.2 | -0.03 | -0.53 |
| 24 |    | 0.96 | 68.8 | 73.2 | -0.27 | -0.42 |
| 25 |    |      |      |      |       |       |
| 26 |    | 1.41 | 72.6 | 79.3 | -0.77 | -0.84 |
| 27 |    | 0.07 | 73.5 | 78.7 | -0.03 | -0.06 |
| 28 |    | 0.09 | 55.9 | 58.6 | -0.02 | -0.80 |
| 29 |    |      |      |      |       |       |
| 30 |    | 0.12 | 78.5 | 84.4 | -0.10 | -0.11 |
| 31 |    | 0.07 | 66.9 | 72.9 | -0.04 | -0.26 |
| 32 |    | 0.22 | 71.1 | 77.9 | -0.12 | -0.24 |
| 33 |    |      |      |      |       |       |
| 34 |    | 0.78 | 61.8 | 65.7 | -0.27 | -0.77 |
| 35 |    | 0.19 | 74.9 | 82.5 | -0.12 | -0.15 |
| 36 |    | 0.98 | 56.4 | 58.8 | -0.19 | -0.81 |
| 37 |    |      |      |      |       |       |
| 38 |    | 0.67 | 71.4 | 82.3 | -0.27 | -0.42 |
| 39 |    | 0.09 | 79.0 | 85.1 | -0.08 | -0.10 |
| 40 |    | 0.13 | 78.6 | 85.4 | -0.10 | -0.12 |
| 41 |    |      |      |      |       |       |
| 42 |    | 1.02 | 70.6 | 74.2 | -0.50 | -0.64 |
| 43 | NA | NA   | NA   | NA   | NA    |       |
| 44 | NA | NA   | NA   | NA   | NA    |       |
| 45 |    |      |      |      |       |       |
| 46 |    | 0.07 | 81.6 | 84.5 | -0.06 | -0.06 |
| 47 |    | 0.06 | 76.9 | 82.0 | -0.03 | -0.05 |
| 48 |    | 0.07 | 76.2 | 81.2 | -0.04 | -0.10 |
| 49 |    |      |      |      |       |       |
| 50 | NA | NA   | NA   | NA   | NA    |       |
| 51 |    | 0.33 | 67.1 | 76.8 | -0.11 | -0.18 |
| 52 |    | 0.31 | 77.7 | 80.3 | -0.24 | -0.26 |
| 53 |    | 0.98 | 76.5 | 79.8 | -0.62 | -0.51 |
| 54 |    |      |      |      |       |       |
| 55 |    | 0.20 | 71.6 | 78.6 | -0.09 | -0.13 |
| 56 | NA | NA   | NA   | NA   | NA    |       |
| 57 |    | 0.48 | 67.2 | 75.2 | -0.22 | -0.43 |
| 58 |    |      |      |      |       |       |
| 59 |    | 0.97 | 68.8 | 77.2 | -0.35 | -0.43 |
| 60 |    |      |      |      |       |       |

|    |    |      |      |      |       |       |
|----|----|------|------|------|-------|-------|
| 1  |    |      |      |      |       |       |
| 2  |    |      |      |      |       |       |
| 3  |    | 0.04 | 74.6 | 79.4 | -0.02 | -0.04 |
| 4  |    | 0.57 | 75.2 | 81.4 | -0.30 | -0.30 |
| 5  |    | 0.04 | 70.4 | 81.4 | -0.02 | -0.07 |
| 6  |    | 0.03 | 80.8 | 84.3 | -0.02 | -0.06 |
| 7  |    | 0.08 | 76.6 | 80.9 | -0.06 | -0.10 |
| 8  |    | 0.22 | 61.0 | 61.8 | -0.05 | -0.58 |
| 9  |    | 0.03 | 74.8 | 77.2 | -0.01 | -0.08 |
| 10 |    | 0.06 | 61.5 | 63.4 | -0.02 | -0.56 |
| 11 |    | 3.20 | 62.3 | 64.5 | -0.89 | -0.90 |
| 12 |    | 0.03 | 79.1 | 83.1 | -0.02 | -0.05 |
| 13 | NA | NA   | NA   | NA   | NA    | NA    |
| 14 |    | 1.22 | 64.0 | 68.6 | -0.38 | -0.60 |
| 15 |    | 0.29 | 71.6 | 77.7 | -0.16 | -0.25 |
| 16 |    | 0.05 | 61.1 | 62.1 | -0.01 | -0.57 |
| 17 |    | 0.77 | 56.6 | 58.7 | -0.16 | -0.69 |
| 18 |    | 0.03 | 70.4 | 80.0 | -0.01 | -0.06 |
| 19 |    | 0.25 | 70.2 | 75.9 | -0.09 | -0.16 |
| 20 |    | 0.20 | 60.9 | 66.5 | -0.05 | -0.47 |
| 21 |    | 0.07 | 75.6 | 77.9 | -0.04 | -0.19 |
| 22 |    | 0.07 | 79.0 | 85.2 | -0.06 | -0.12 |
| 23 |    | 0.07 | 71.8 | 78.4 | -0.04 | -0.13 |
| 24 |    | 0.02 | 80.0 | 84.7 | -0.02 | -0.04 |
| 25 |    | 1.88 | 58.8 | 61.4 | -0.57 | -1.09 |
| 26 |    | 0.03 | 60.4 | 61.7 | -0.01 | -0.51 |
| 27 |    | 1.92 | 59.9 | 62.6 | -0.55 | -1.03 |
| 28 |    | 0.18 | 77.2 | 80.8 | -0.12 | -0.19 |
| 29 |    | 0.11 | 65.7 | 68.7 | -0.03 | -0.29 |
| 30 |    | 0.92 | 70.5 | 75.8 | -0.45 | -0.55 |
| 31 |    | 0.20 | 74.2 | 81.4 | -0.11 | -0.21 |
| 32 |    | 0.02 | 72.6 | 75.8 | -0.01 | -0.16 |
| 33 |    | 0.02 | 74.3 | 78.4 | -0.01 | -0.06 |
| 34 | NA | NA   | NA   | NA   | NA    | NA    |
| 35 |    | 0.05 | 76.9 | 80.8 | -0.04 | -0.07 |
| 36 |    | 0.03 | 69.5 | 72.2 | -0.01 | -0.25 |
| 37 | NA | NA   | NA   | NA   | NA    | NA    |
| 38 |    | 0.01 | 74.2 | 81.0 | -0.01 | -0.04 |
| 39 |    | 0.17 | 72.2 | 76.2 | -0.10 | -0.24 |
| 40 |    | 2.20 | 60.8 | 66.9 | -0.52 | -0.79 |
| 41 | NA | NA   | NA   | NA   | NA    | NA    |
| 42 |    | 0.07 | 72.9 | 76.1 | -0.04 | -0.13 |
| 43 |    | 0.01 | 81.6 | 85.8 | -0.01 | -0.02 |
| 44 |    | 0.04 | 61.0 | 63.4 | -0.01 | -0.46 |
| 45 |    | 0.02 | 78.0 | 82.9 | -0.02 | -0.08 |
| 46 |    |      |      |      |       |       |
| 47 |    |      |      |      |       |       |
| 48 |    |      |      |      |       |       |
| 49 |    |      |      |      |       |       |
| 50 |    |      |      |      |       |       |
| 51 |    |      |      |      |       |       |
| 52 |    |      |      |      |       |       |
| 53 |    |      |      |      |       |       |
| 54 |    |      |      |      |       |       |
| 55 |    |      |      |      |       |       |
| 56 |    |      |      |      |       |       |
| 57 |    |      |      |      |       |       |
| 58 |    |      |      |      |       |       |
| 59 |    |      |      |      |       |       |
| 60 |    |      |      |      |       |       |

|    |    |      |      |      |       |       |
|----|----|------|------|------|-------|-------|
| 1  |    |      |      |      |       |       |
| 2  |    |      |      |      |       |       |
| 3  |    | 0.01 | 69.5 | 78.2 | 0.00  | -0.07 |
| 4  |    | 0.01 | 80.7 | 84.0 | -0.01 | -0.04 |
| 5  |    | 0.01 | 80.7 | 84.0 | -0.01 | -0.04 |
| 6  | NA | NA   | NA   | NA   | NA    |       |
| 7  |    | 0.01 | 80.0 | 86.0 | -0.01 | -0.03 |
| 8  |    | 0.40 | 68.3 | 75.8 | -0.18 | -0.40 |
| 9  |    | 0.60 | 58.5 | 63.6 | -0.14 | -0.68 |
| 10 |    | 0.03 | 73.0 | 76.3 | -0.01 | -0.14 |
| 11 |    | 0.01 | 67.0 | 71.1 | 0.00  | -0.25 |
| 12 |    | 0.01 | 81.6 | 85.5 | -0.01 | -0.03 |
| 13 |    | 0.01 | 81.6 | 87.8 | -0.01 | -0.03 |
| 14 |    | 0.01 | 81.6 | 87.8 | -0.01 | -0.03 |
| 15 |    | 0.01 | 81.6 | 87.8 | -0.01 | -0.03 |
| 16 |    | 0.07 | 58.0 | 63.4 | -0.01 | -0.52 |
| 17 |    | 0.07 | 58.0 | 63.4 | -0.01 | -0.52 |
| 18 | NA | NA   | NA   | NA   | NA    |       |
| 19 |    | 0.00 | 69.6 | 73.7 | 0.00  | -0.20 |
| 20 |    | 0.07 | 59.8 | 62.6 | -0.02 | -0.37 |
| 21 |    | 0.07 | 59.8 | 62.6 | -0.02 | -0.37 |
| 22 | NA | NA   | NA   | NA   | NA    |       |
| 23 |    | 0.02 | 66.4 | 72.0 | -0.01 | -0.27 |
| 24 |    | 0.01 | 69.3 | 78.3 | 0.00  | -0.10 |
| 25 |    | 0.01 | 69.3 | 78.3 | 0.00  | -0.10 |
| 26 |    | 0.00 | 73.8 | 80.3 | 0.00  | -0.06 |
| 27 |    | 0.00 | 73.6 | 80.9 | 0.00  | -0.07 |
| 28 | NA | NA   | NA   | NA   | NA    |       |
| 29 | NA | NA   | NA   | NA   | NA    |       |
| 30 | NA | NA   | NA   | NA   | NA    |       |
| 31 | NA | NA   | NA   | NA   | NA    |       |
| 32 | NA | NA   | NA   | NA   | NA    |       |
| 33 | NA | NA   | NA   | NA   | NA    |       |
| 34 |    | 0.00 | 64.2 | 69.9 | 0.00  | -0.33 |
| 35 | NA | NA   | NA   | NA   | NA    |       |
| 36 | NA | NA   | NA   | NA   | NA    |       |
| 37 | NA | NA   | NA   | NA   | NA    |       |
| 38 | NA | NA   | NA   | NA   | NA    |       |
| 39 | NA | NA   | NA   | NA   | NA    |       |
| 40 | NA | NA   | NA   | NA   | NA    |       |
| 41 | NA | NA   | NA   | NA   | NA    |       |
| 42 | NA | NA   | NA   | NA   | NA    |       |
| 43 | NA | NA   | NA   | NA   | NA    |       |
| 44 | NA | NA   | NA   | NA   | NA    |       |
| 45 | NA | NA   | NA   | NA   | NA    |       |
| 46 | NA | NA   | NA   | NA   | NA    |       |
| 47 | NA | NA   | NA   | NA   | NA    |       |
| 48 | NA | NA   | NA   | NA   | NA    |       |
| 49 | NA | NA   | NA   | NA   | NA    |       |
| 50 | NA | NA   | NA   | NA   | NA    |       |
| 51 | NA | NA   | NA   | NA   | NA    |       |
| 52 | NA | NA   | NA   | NA   | NA    |       |
| 53 | NA | NA   | NA   | NA   | NA    |       |
| 54 | NA | NA   | NA   | NA   | NA    |       |
| 55 | NA | NA   | NA   | NA   | NA    |       |
| 56 | NA | NA   | NA   | NA   | NA    |       |
| 57 | NA | NA   | NA   | NA   | NA    |       |
| 58 | NA | NA   | NA   | NA   | NA    |       |
| 59 | NA | NA   | NA   | NA   | NA    |       |
| 60 |    |      |      |      |       |       |



|    |    |    |    |    |    |
|----|----|----|----|----|----|
| 1  |    |    |    |    |    |
| 2  |    |    |    |    |    |
| 3  | NA | NA | NA | NA | NA |
| 4  | NA | NA | NA | NA | NA |
| 5  | NA | NA | NA | NA | NA |
| 6  | NA | NA | NA | NA | NA |
| 7  | NA | NA | NA | NA | NA |
| 8  | NA | NA | NA | NA | NA |
| 9  | NA | NA | NA | NA | NA |
| 10 | NA | NA | NA | NA | NA |
| 11 | NA | NA | NA | NA | NA |
| 12 | NA | NA | NA | NA | NA |
| 13 | NA | NA | NA | NA | NA |
| 14 | NA | NA | NA | NA | NA |
| 15 | NA | NA | NA | NA | NA |
| 16 | NA | NA | NA | NA | NA |
| 17 | NA | NA | NA | NA | NA |
| 18 | NA | NA | NA | NA | NA |
| 19 | NA | NA | NA | NA | NA |
| 20 | NA | NA | NA | NA | NA |
| 21 | NA | NA | NA | NA | NA |
| 22 | NA | NA | NA | NA | NA |
| 23 | NA | NA | NA | NA | NA |
| 24 | NA | NA | NA | NA | NA |
| 25 | NA | NA | NA | NA | NA |
| 26 | NA | NA | NA | NA | NA |
| 27 | NA | NA | NA | NA | NA |
| 28 |    |    |    |    |    |
| 29 |    |    |    |    |    |
| 30 |    |    |    |    |    |
| 31 |    |    |    |    |    |
| 32 |    |    |    |    |    |
| 33 |    |    |    |    |    |
| 34 |    |    |    |    |    |
| 35 |    |    |    |    |    |
| 36 |    |    |    |    |    |
| 37 |    |    |    |    |    |
| 38 |    |    |    |    |    |
| 39 |    |    |    |    |    |
| 40 |    |    |    |    |    |
| 41 |    |    |    |    |    |
| 42 |    |    |    |    |    |
| 43 |    |    |    |    |    |
| 44 |    |    |    |    |    |
| 45 |    |    |    |    |    |
| 46 |    |    |    |    |    |
| 47 |    |    |    |    |    |
| 48 |    |    |    |    |    |
| 49 |    |    |    |    |    |
| 50 |    |    |    |    |    |
| 51 |    |    |    |    |    |
| 52 |    |    |    |    |    |
| 53 |    |    |    |    |    |
| 54 |    |    |    |    |    |
| 55 |    |    |    |    |    |
| 56 |    |    |    |    |    |
| 57 |    |    |    |    |    |
| 58 |    |    |    |    |    |
| 59 |    |    |    |    |    |
| 60 |    |    |    |    |    |

For peer review only

# BMJ Open

## Beyond Deaths per Capita: Comparative CoViD-19 Mortality Indicators

|                                 |                                                             |
|---------------------------------|-------------------------------------------------------------|
| Journal:                        | <i>BMJ Open</i>                                             |
| Manuscript ID                   | bmjopen-2020-042934.R1                                      |
| Article Type:                   | Original research                                           |
| Date Submitted by the Author:   | 11-Jan-2021                                                 |
| Complete List of Authors:       | Heuveline, Patrick; UCLA, CCPR<br>Tzen, Michael; UCLA, CCPR |
| <b>Primary Subject Heading</b>: | Public health                                               |
| Secondary Subject Heading:      | Epidemiology                                                |
| Keywords:                       | COVID-19, PUBLIC HEALTH, STATISTICS & RESEARCH METHODS      |
|                                 |                                                             |

SCHOLARONE™  
Manuscripts



I, the Submitting Author has the right to grant and does grant on behalf of all authors of the Work (as defined in the below author licence), an exclusive licence and/or a non-exclusive licence for contributions from authors who are: i) UK Crown employees; ii) where BMJ has agreed a CC-BY licence shall apply, and/or iii) in accordance with the terms applicable for US Federal Government officers or employees acting as part of their official duties; on a worldwide, perpetual, irrevocable, royalty-free basis to BMJ Publishing Group Ltd ("BMJ") its licensees and where the relevant Journal is co-owned by BMJ to the co-owners of the Journal, to publish the Work in this journal and any other BMJ products and to exploit all rights, as set out in our [licence](#).

The Submitting Author accepts and understands that any supply made under these terms is made by BMJ to the Submitting Author unless you are acting as an employee on behalf of your employer or a postgraduate student of an affiliated institution which is paying any applicable article publishing charge ("APC") for Open Access articles. Where the Submitting Author wishes to make the Work available on an Open Access basis (and intends to pay the relevant APC), the terms of reuse of such Open Access shall be governed by a Creative Commons licence – details of these licences and which [Creative Commons](#) licence will apply to this Work are set out in our licence referred to above.

Other than as permitted in any relevant BMJ Author's Self Archiving Policies, I confirm this Work has not been accepted for publication elsewhere, is not being considered for publication elsewhere and does not duplicate material already published. I confirm all authors consent to publication of this Work and authorise the granting of this licence.

1  
2  
3 **Beyond Deaths per Capita:**  
4  
5 **Comparative CoViD-19 Mortality Indicators**  
6  
7

8  
9  
10 *Updated Version, 1/10/2021*

11  
12 *Original Manuscript Submitted 4/29/2020, Published 5/5/2020 at:*  
13  
14  
15 <https://www.medrxiv.org/content/10.1101/2020.04.29.20085506v1>  
16

17  
18  
19 Patrick Heuveline, Ph.D. and Michael Tzen, M.S.

20  
21 California Center for Population Research (CCPR)

22  
23 University of California, Los Angeles (UCLA)  
24  
25

26  
27  
28 Contact author: Patrick Heuveline [heuveline@soc.ucla.edu](mailto:heuveline@soc.ucla.edu)  
29  
30

31  
32  
33 *Acknowledgment*  
34

35 The authors benefited from facilities and resources provided by the California Center for  
36 Population Research at UCLA (CCPR), which receives core support (P2C-HD041022) from the  
37 Eunice Kennedy Shriver National Institute of Child Health and Human Development (NICHD).  
38  
39

40 The authors thank Patrick Gerland for clarifications regarding UN demographic data, Hiram  
41 Beltrán-Sánchez for additional data for Mexico, and Enrique Acosta, Lars Ängquist, Sam  
42 Preston, Jason Kerwin and Piedad Urdinola for comments on an earlier draft.  
43  
44  
45  
46  
47  
48  
49  
50  
51  
52  
53  
54  
55  
56  
57  
58  
59  
60

## Beyond Deaths per Capita: Comparative CoViD-19 Mortality Indicators

### Abstract

*Objectives:* Following well-established practices in demography, this article discusses several measures based on the number of CoViD-19 deaths to facilitate comparisons over time and across populations.

*Settings:* National populations in 186 UN countries and territories and populations in first-level sub-national administrative entities in Brazil, China, Italy, Mexico, Peru, Spain, and the USA.

*Participants:* None (death statistics only).

*Primary and Secondary Outcome Measures:* An unstandardized occurrence/exposure rate comparable to the Crude Death Rate; an indirectly age-and-sex standardized rate that can be derived even when the breakdown of CoViD-19 deaths by age and sex required for direct standardization is unavailable; the reduction in life expectancy at birth corresponding to the 2020 number of CoViD-19 deaths.

*Results:* To date, the highest unstandardized rate has been in New York, at its peak exceeding the state 2017 Crude Death Rate. Populations compare differently after standardization: while parts of Italy, Spain and the USA have the highest unstandardized rates, parts of Mexico and Peru have the highest standardized rates. For several populations with the necessary data by age and sex for direct standardization, we show that direct and indirect standardization yield similar results. US life expectancy is estimated to have declined this year by more than a year (-1.26 years), far more than during the worst year of the HIV epidemic, or the worst three years of the opioid crisis, and to reach its lowest level since 2008. Substantially larger reductions, exceeding

1  
2  
3 two years, are estimated for Panama, Peru, and parts of Italy, Spain, the USA, and especially,  
4  
5 Mexico.

6  
7  
8 *Conclusions:* With lesser demand on data than direct standardization, indirect standardization is a  
9  
10 valid alternative to adjust international comparisons for differences in population distribution by  
11  
12 sex and age-groups. A number of populations have experienced reductions in 2020 life  
13  
14 expectancies that are substantial by recent historical standards.  
15  
16

### 17 18 19 **Strengths and limitations**

- 20  
21 • The CoViD-19 mortality indicators presented in this article are directly comparable with  
22  
23 three well-established indicators of overall mortality: the Crude Death Rate, the Age-  
24  
25 Standardized Death Rate and Life Expectancy at Birth
- 26  
27 • In particular, this article demonstrates that when CoViD-19 deaths in a population are not  
28  
29 tabulated by sex and age, indirect standardization techniques can still be used to improve  
30  
31 comparisons of CoViD-19 mortality in this and other populations by accounting for  
32  
33 differences in population distributions by age and sex
- 34  
35 • While requiring additional data on mortality from other causes, translating cumulative  
36  
37 numbers of CoViD-19 deaths into their impact on life expectancy at birth allows for  
38  
39 comparison of CoViD-19 mortality with previous reversals in secular mortality declines
- 40  
41 • The comparability of these CoViD-19 mortality indicators is affected by potential  
42  
43 differences in identifying and reporting CoViD-19 as a cause of death across populations
- 44  
45 • Further analyses are needed to assess potential changes in mortality from other causes  
46  
47 induced by CoViD-19, as those would also contribute to the impact of CoViD-19 on life  
48  
49 expectancy at birth.  
50  
51  
52  
53  
54  
55  
56  
57  
58  
59  
60

## Beyond Deaths per Capita

### *Background*

As of June 1<sup>st</sup>, deaths from the novel coronavirus disease 2019 (CoViD-19) had been reported in 186 of the 235 countries and territories of the United Nations system (UN). As with previous pandemics,<sup>1</sup> the disease progression can be more reliably tracked with death than with case counts. Cumulative CoViD-19 death counts at a given time depend on the determination of the cause of death, delays in reporting deaths to central reporting agencies—different for deaths at home, in hospitals and other institutions—and delays in verification, consolidation and publication at reporting agencies. In the USA, for instance, the grim milestone of 100,000 cumulative CoViD-19 deaths was reached at the end of May, when data from the Center for Disease Control and Prevention (CDC) suggested that the number of deaths in the country exceeded expectations based on past trends by about 130,000.<sup>2</sup> While CoViD-19 deaths might not be fully reported, the death undercount is both easier to estimate and an order-of-magnitude smaller than the proportion of unreported cases. CDC data from large-scale seroprevalence surveys suggest that as much as 10 times more SARS-CoV-2 infections occurred than the number of reported CoViD-19 cases<sup>3</sup>—a situation in no way unique to the US.<sup>4</sup> CoViD-19 mortality indicators are also more pertinent for assessing public-health measures that were intended less to reduce the eventual number of cases than to “flatten the curve” and eventually limit the number of CoViD-19 deaths by keeping the need for emergency hospitalizations below local hospital capacity.

For comparative purposes, cumulative death counts are affected by several demographic characteristics such as, most obviously, population size. The deaths per capita ratio, however, represent the first rather than the only adjustment that can be taken towards more meaningful

1  
2  
3 CoViD-19 mortality comparisons. Following well-established practices in demography,<sup>5</sup> this  
4  
5 article presents more refined indicators that can be derived with additional demographic data.  
6  
7 The corresponding measures are discussed using results for the 186 UN countries and territories  
8  
9 with at least one death by June 1<sup>st</sup>. To illustrate issues of scale, the measures are also calculated  
10  
11 at the first sub-national administrative level (e.g., states or provinces) in selected countries,  
12  
13 which were the largest countries in the successive “epicenters” of the pandemic over time: first  
14  
15 China, then Italy and Spain, followed by the US, and now Brazil, Mexico and Peru. Altogether,  
16  
17 at least one of the measures presented here is estimated for a total of 386 national and  
18  
19 subnational populations.  
20  
21  
22

### 23 *Methods and Data*

24  
25 We first calculate an occurrence/exposure *rate* that relates the cumulative number of CoViD-19  
26  
27 deaths to the number of person-years lived in the population during the period. With the standard  
28  
29 approximation for person-years, the period Crude CoViD-19 Death Rate (*CCDR*) can be  
30  
31 measured as:  
32  
33

$$34 \quad CCDR[t_1, t] = \frac{D^c[t_1, t]}{N(t_m) \cdot (t - t_1)}$$

35  
36 where  $t_1$  is an initial time,  $D^c[t_1, t]$  a cumulative CoViD-19 deaths count between times  $t_1$  and  $t$ ,  
37  
38 and  $N(t_m)$  an estimate of the total population size at time  $t_m$  between time  $t_1$  and time  $t$ . The  
39  
40 difference between this period rate and the deaths per capita ratio is easy to miss when the deaths  
41  
42 count in the numerator, identical for both, is an annual number of deaths. In that case, the  
43  
44 number of person-years in the denominator of the occurrence/exposure rate can indeed be  
45  
46 approximated by the population size at some point during the year. However, the two are no  
47  
48 longer directly comparable, and the metric of the ratio difficult to interpret, when the deaths  
49  
50 counts correspond to periods of different durations. On the contrary, the *CCDR* is expressed in  
51  
52  
53  
54  
55  
56  
57  
58  
59  
60



1  
2  
3 deaths per person-*year* and remains directly comparable to the annual Crude Death Rate (*CDR*)  
4  
5 available for most populations. We first calculate the *CCDR* for the period starting on the day of  
6  
7 the first death in the population, which was obtained from World Health Organization (WHO)  
8  
9 daily situation reports,<sup>6</sup> and ending on January 1<sup>st</sup>, 2021. The cumulative number of deaths  
10  
11 reported up to that day was obtained from Johns Hopkins University's Center for Systems  
12  
13 Science and Engineering (CSSE)<sup>7</sup> and total population size was obtained from the UN.<sup>8</sup>  
14  
15 (Additional sources used for sub-national units are referenced in the online supplementary  
16  
17 materials of this article, S11: Technical Appendix.)  
18  
19

20  
21 As age and sex variations in CoViD-19 mortality have been clearly established,<sup>9</sup> the  
22  
23 period rates should be adjusted to take into account differences in age and sex distributions.  
24  
25 Direct age-and-sex standardization requires data on CoViD-19 deaths by age and sex, which are  
26  
27 unavailable or unreliable for a majority of UN countries and territories and most sub-national  
28  
29 populations. An alternative approach, known as indirect standardization, borrows an age-and-sex  
30  
31 pattern of mortality from a well-documented population so that only the age-and-sex distribution  
32  
33 of the populations of interest is required. Based on this approach, we calculate the Comparative  
34  
35 CoViD-19 Mortality Ratio (*CCMR*):  
36  
37

$$38 \quad CCMR[t_1, t] = \frac{D^C[t_1, t]}{\sum_j \sum_i {}^{US}M_{ij}^C \cdot N_{ij}(t_m)}$$

39  
40 where  ${}^{US}M_{ij}^C$  is the CoViD-19 death rate specific to age group  $i$  and sex  $j$  in the US and  $N_{ij}(t_m)$  is  
41  
42 the size of the age group  $i$  for sex  $j$  in the population of interest. The reference age-and-sex death  
43  
44 rates selected here to illustrate the technique were obtained from the Centers for Disease Control  
45  
46 and Prevention (CDC) weekly-updated distribution of CoViD-19 deaths by age and sex in the  
47  
48 US,<sup>10</sup> to date the largest number of CoViD-19 deaths distributed by age and sex. Unavailable  
49  
50 only for the 13 countries/territories whose population size is less than 90,000, population age-  
51  
52  
53  
54  
55  
56  
57  
58  
59  
60

and-sex distributions were taken from the UN data and, for subnational populations, national statistics.

Multiplying a population *CCMR* by the US *CCDR* yields an Indirectly age-and-sex Standardized CoViD-19 Death Rate (*ISCDR*) for that population, with the US age-and-sex population distribution as the standard:

$$\begin{aligned} ISCDR[t_1,t] &= CCMR[t_1,t] \cdot \sum_j \sum_i \frac{US D_{ij}(t_m)}{US N_{ij}(t_m)} \cdot \frac{US N_{ij}(t_m)}{US N(t_m)} = CCMR[t_1,t] \cdot \sum_j \sum_i US M_{ij}^C \cdot US C_{ij}(t_m) \\ &= \sum_j \sum_i (US M_{ij}^C \cdot CCMR[t_1,t]) \cdot US C_{ij}(t_m) \end{aligned}$$

*CCMR* and *ISCDR* are again calculated for the period starting on the day of the first death in the population and ending on January 1<sup>st</sup>, 2021.

Last, life expectancy at birth provides a summary indicator of mortality in a population in a more intuitive metric (years) than these rates. A standard demographic technique allows to estimate the impact that *eliminating* a cause of death would have on life expectancy at birth.<sup>11 12</sup> When a prior period life table (i.e., not factoring CoViD-19 mortality) is available, applying this technique backward allows to translate a cumulative CoViD-19-deaths forecast for the same period into a CoViD-19-induced *reduction* in male and female life expectancies at birth. The cumulative number of reported CoViD-19 deaths in 2020 were used to derive new male and female life expectancies at birth in 277 populations with extant life tables (155 countries, plus Italian regions, Spanish autonomous communities, Mexican and US states). Calculations required a previous projection of the male and female year-2020 life tables in these populations. For countries, these were again derived from UN data, by interpolation between the 2015-20 estimates and 2020-25 projections. For sub-national populations, life tables available from

1  
2  
3 national statistical institutes were extrapolated to 2020. Additional details on their calculation are  
4  
5 described in the online supplementary materials of this article (SI1: Technical Appendix; SI2a &  
6  
7 SI2b: An Example).  
8

### 9 10 *Ethics*

11  
12 This study has no human subjects. Analyses are based solely on publicly available online data on  
13  
14 anonymous, deceased individuals.  
15

16  
17 Patient and Public Involvement: This research was done without patient involvement. Patients  
18  
19 were not invited to comment on the study design and were not consulted to develop patient  
20  
21 relevant outcomes or interpret the results. Patients were not invited to contribute to the writing  
22  
23 or editing of this document for readability or accuracy.  
24  
25

### 26 27 *Results*

28  
29 To illustrate the properties of these indicators, we briefly describe results from the January 1<sup>st</sup>,  
30  
31 2021 updates of the CCSE and CDC data. (Full results for that day are available in the online  
32  
33 supplementary materials of this article, SI4: Full Results; updated results will continue to be  
34  
35 uploaded to <https://github.com/statsccpr/ind-cov-mort>). For the period starting on the day of the  
36  
37 first CoViD-19 death observed in a population and ending on January 1<sup>st</sup>, 2021, the highest  
38  
39 national values of the *CCDR* (given in deaths per thousand person-years) are found in five  
40  
41 European nations (San Marino, 2.11; Belgium, 2.10; Slovenia, 1.63; Bosnia and Herzegovina,  
42  
43 1.57; North Macedonia, 1.54). Among the 20 nations with the highest values, only Peru (1.45),  
44  
45 the USA (1.25), Mexico (1.24) and Argentina (1.16) are outside Europe. This list of nations,  
46  
47 however, illustrates the issue of scale with small, densely populated nations exhibiting higher  
48  
49 values than some larger nations, but possibly not than similarly-sized parts of these nations. If  
50  
51 comparisons are based on subnational rather than national boundaries, *CCDR* values for  
52  
53  
54  
55  
56  
57  
58  
59  
60

1  
2  
3 populations of 5 million or more are higher for parts of Italy (Lombardy, 2.90), the USA (New  
4 Jersey, 2.65; New York, 2.39; Massachusetts, 2.27) and Spain (Madrid, 2.15) than for Belgium.  
5  
6 Values for parts of Mexico (Mexico City, 2.06), Peru (Lima, 1.99), and Brazil (Rio de Janeiro,  
7  
8 1.85) and for five other US states (Illinois, Michigan, Pennsylvania, Arizona and Indiana) are  
9  
10 also higher than for any nation besides Belgium (again among populations of 5 million or more).  
11  
12  
13

14  
15 The main motivation for the *CCDR* is not to compare CoViD-19 mortality across  
16  
17 populations, however, but rather to compare CoViD-19 and overall mortality. Across the  
18  
19 populations monitored here, the highest *CCDR* value to date for a period starting on the day of  
20  
21 the first CoViD-19 death has been reached in New York (9.44 for the period ending on 4/25)  
22  
23 where it exceeded the state's most recent annual *CDR* (7.83 in 2017).<sup>13</sup>. The period *CCDR*  
24  
25 remained above the 2017 *CDR* until May 20 (Figure 1). Ignoring competing risks between  
26  
27 CoViD-19 and other-cause mortality, and seasonality and period trends in other-cause mortality,  
28  
29 this indicates roughly equivalent mortality from CoViD-19 and from all other causes combined  
30  
31 between March 14 (first death) and May 20.  
32  
33  
34

35 \*Figure 1 here\*

36  
37  
38 Figure 1: Estimated value of the period *CCDR*, New York (in deaths per 1,000 person-years, period  
39  
40 starting on March 14 and ending on day shown on the horizontal axis)

41 Sources: CDC (*CDR*) and authors' calculations (*CCDR*, see SI1: Technical Appendix)

42  
43  
44  
45 The effects of indirect age-standardization are illustrated in Figure 2, comparing current-  
46  
47 period *CCDR* and *ISCDR* values for selected national and subnational populations (both in  
48  
49 deaths per thousand person-years). By construction, the *CCMR* equals 1 and the *CCDR* and  
50  
51 *ISCDR* are the same in the US, but the standardized *ISCDR* is lower than the unstandardized  
52  
53 *CCDR* in Europe, whereas the standardized rate can be two to three times the unstandardized rate  
54  
55  
56  
57  
58  
59

1  
2  
3 in Mexico and South American countries. The 20 highest values of the *ISCDR* are for eleven  
4 Mexican States and eight Peruvian *Departamentos*, ahead of Rio de Janeiro (Brazil). Among  
5 national and subnational units with a population size of 5 million or more shown in Figure 2, the  
6 highest value in Europe (Lombardy, 1.95) is lower than subnational values for Mexico (3.51) and  
7 four other Mexican states, Lima (Peru, 3.46), Rio de Janeiro (Brazil, 3.14) and four other  
8 Brazilian states, and New Jersey (2.52) and two other US states, as well as national values for  
9 Peru (2.68), Mexico (2.51), Bolivia (2.15) and Ecuador (2.05).

10  
11  
12  
13  
14  
15  
16  
17  
18  
19 \*Figure 2 here\*

20  
21 Figure 2: Estimated value of the *CCDR* and *ISCDR* (in deaths per 1,000 person-years), by national and  
22 subnational unit (20 *CCDR* and 20 largest *ISCDR* values for units with a population size of 5 million or  
23 more)

24  
25  
26  
27 Sources: Authors' calculations (see SI1: Technical Appendix)

28  
29  
30  
31 As for the mortality impact, reductions in 2020 life expectancies at birth of two years or  
32 more are estimated for two nations: Panama (2.22) and Peru (2.09). Subnational values were  
33 estimated within five nations and if reductions of two years or more were also estimated for  
34 Madrid (Spain), two Italian regions, two Peruvian *Departamentos*, and for four US states, values  
35 exceed two years for eleven Mexican states, foremost, Quintana Roo (includes Cancún, 3.93)  
36 and Baja California (includes Tijuana, 3.54, both values in years). Figure 3 shows reductions  
37 exceeding 1.3 years in 20 national and subnational units with a population size of 5 million or  
38 more.

39  
40  
41  
42  
43  
44  
45  
46  
47  
48  
49 \*Figure 3 here\*

50  
51 Figure 3: Estimated reduction in life expectancy at birth for year 2020, both sexes (in years), by national  
52 and subnational unit (20 largest reductions for units with a population size of 5 million or more)

53  
54 Sources: Authors' calculations (see SI1: Technical Appendix)

1  
2  
3 Period life expectancy at birth is a summary indicator of mortality conditions across the  
4 lifespan that is available for all nations and each year since 1950 from the United Nations, and  
5  
6 for earlier periods in a number of nations. This allows for comparing the mortality impact of  
7  
8 CoViD-19 with prior reversals in the secular increase in life expectancies. An examination of the  
9  
10 United Nations times series, for instance, suggests that next to the exceptional declines induced  
11  
12 by mass homicides in Cambodia (1975-78) and Rwanda (1994), the largest annual declines in  
13  
14 life expectancy at birth since 1950 took place in Eswatini (formerly Swaziland) during the worse  
15  
16 years of the HIV pandemic (2.10 years between 1997 and 1998). Inducing declines in life  
17  
18 expectancies for close to two decades in some countries, the HIV pandemic has had a much  
19  
20 larger cumulative impact than CoViD-19 to date, but the fact that life expectancy at birth may  
21  
22 decline by a larger amount in 2020 in a few national and subnational populations than in the  
23  
24 most affected countries in any year during the HIV pandemic puts in perspective values shown in  
25  
26 Figure 3. Moreover, while the estimated reduction for the USA (1.26) is lower than for the  
27  
28 populations shown in Figure 3, the US life expectancy drop in 2020 will still be the largest since  
29  
30 World War II, far exceeding declines in the worst year of the HIV epidemic (from 75.8 years in  
31  
32 1992 to 75.5 years in 1993), or the worst three years of the opioid-overdose crisis (from 78.9  
33  
34 years in 2014 to 78.6 years in 2017).<sup>14</sup> As illustrated in Figure 4, CoViD-19 is estimated to  
35  
36 reduce US life expectancy at birth in 2020 to its lowest level since 2005.  
37  
38  
39  
40  
41  
42  
43  
44

45 \*Figure 4 here\*

46  
47 Figure 4: Estimated life expectancy at birth, US population, both sexes, by year

48  
49 Sources: CDC (2005-2018), UN and authors' calculations (2019-2020, see SI1: Technical Appendix)

### Discussion

The results above illustrate the properties of different comparative indicators of CoViD-19 mortality. For comparisons across populations, the *ISCDR*, and *CCMR* on which it builds, control for three important factors that contribute to the cumulative count of CoViD-19 deaths in a population: the length of the period over which these deaths are cumulated, the size of the population, and its age-and-sex composition.

With respect to the first of these three factors, both the unstandardized and standardized rates are period indicators that increase and decrease as waves of the pandemic develop.

Contrary to the death per capita ratio, which can only increase over time, the period rates begin to decline when the daily number of additional deaths drops below its average for the period.

This property of the period rates accurately reflects for CoViD-19 mortality a temporal dimension that can often be neglected for overall mortality. This also implies, however, that comparing *ISCDR* values across populations at too different durations of exposure to CoViD-19 would not be meaningful. As shown in Figure 1, this is more problematic early in the diffusion of the epidemic.

With respect to the second factor, comparing *ISCDR* values at the national or sub-national levels illustrates that dividing by population size does not make small and large populations fully comparable. National rates are but population-weighted averages of subnational rates. With person-to-person transmission and uneven population density, these rates can be expected to vary substantially across the territory of the largest countries, making it less likely that the national average will stand out in cross-national comparisons. While the national *ISCDR* is lower for Italy, Spain and the USA than for Belgium, each of these three nations has at

1  
2  
3 least one subnational entity of roughly similar population size with a higher *ISCDR* than  
4  
5 Belgium.  
6

7  
8 Disaggregation to smaller administrative units may allow for more meaningful  
9  
10 comparisons, but might be impeded by data availability. In this respect, indirect standardization  
11  
12 has the advantage of not requiring data on CoViD-19 deaths by age and sex that may not be  
13  
14 available or reliable for smaller areas. As a reliable breakdown of CoViD-19 deaths *is* available  
15  
16 from a number of European countries<sup>15 16</sup> and US states, the *ISCDR* can actually be compared to  
17  
18 a Directly age-and-sex Standardized CoViD-19 Death Rate (*DSCDR*) with the US age-and-sex  
19  
20 population distribution as the standard. Comparing unstandardized with directly and indirectly  
21  
22 standardized rate for the three European nations and the three US states with the highest *ISCDR*  
23  
24 values, Figure 5 shows that the values of the indirectly standardized rate are typically very close  
25  
26 to the corresponding values of the directly standardized rate.  
27  
28  
29

30  
31 \*Figure 5 here\*

32  
33 Figure 5: Estimated value of the *CCDR*, *ISCDR* and *DSCDR* (in deaths per 1,000 person-years), by  
34  
35 selected nation and US state  
36

37 Sources: Ined, CDC, *Registro Civil* (Brazil)<sup>17</sup> and authors' calculations (see SI3: Sensitivity Analysis)  
38

39  
40 Over time, sex- and age-specific rates of CoViD-19 mortality have become available for  
41  
42 a larger and more diverse set of nations,<sup>18</sup> providing a wider choice of possible standards. As is  
43  
44 the case with the values of directly standardized rates, the values of indirectly standardized rates  
45  
46 depend on the choice of a standard. While it is theoretically possible that the choice of a standard  
47  
48 would also affect the rankings of directly or indirectly standardized rates, empirical regularities  
49  
50 in mortality patterns across populations make this quite unlikely. The age patterns of CoViD-19  
51  
52 death rates available so far similarly exhibit remarkable regularities, with some modest variation  
53  
54 in the slope of these age patterns at the oldest ages, probably due to the number of fatalities in  
55  
56  
57  
58  
59  
60



1  
2  
3 nursing homes across Europe and the USA.<sup>19</sup> Indirect standardization thus appears to provide a  
4 valid alternative to rank CoViD-19 mortality across populations when data limitations prevent  
5 direct standardization.  
6  
7  
8  
9

10 Variations in the slope of the age-specific rates of CoViD-19 mortality would also  
11 affect the estimated reductions in life expectancy at birth. If these rates increase less rapidly with  
12 age at the oldest ages in a population than they do in the USA, the age pattern of CoViD-19  
13 deaths obtained here by multiplying the US age-specific rates and the population sizes of the  
14 different age groups would then be “older” than the actual age pattern. In turn, this would imply  
15 that the average number of years of life lost per CoViD-19 death and the total impact of CoViD-  
16 19 on life expectancy at birth is actually larger than estimated here. A simulation using the  
17 reported sex- and age-distribution of CoViD-19 for Brazil yielded a 1.67-year estimated  
18 reduction in life expectancy, however, only a 3% difference with the reduction estimated here  
19 (1.72 years, see Supplementary Information, SI3: Sensitivity Analysis).  
20  
21  
22  
23  
24  
25  
26  
27  
28  
29  
30  
31  
32

33 Another source of uncertainty originates in the role of preexisting conditions in CoViD-  
34 19 mortality. While this role is well documented, data on CoViD-19 fatalities by preexisting  
35 conditions are even less commonly available than data CoViD-19 fatalities by age.<sup>20</sup> One study  
36 suggests that the average number of years of life lost per CoViD-19 death might be  
37 overestimated by about 10% when preexisting conditions are not accounted for.<sup>21</sup> This provides  
38 an order of magnitude for the upward bias that ignoring preexisting conditions might similarly  
39 induce in estimating reductions in life expectancies case here based solely on the age of CoViD-  
40 19 victims.  
41  
42  
43  
44  
45  
46  
47  
48  
49  
50

51 Moreover, the illustrative results presented here make no adjustment for potential biases  
52 in the number of confirmed CoViD-19 deaths. Estimates of life-expectancy reductions based on  
53  
54  
55  
56  
57  
58  
59  
60

1  
2  
3 these also assume no “indirect” effect of the pandemic on other-cause mortality. In populations  
4 with complete and timely registration of deaths, the reporting biases and indirect effects can be  
5 jointly assessed from the increase in overall mortality over past “benchmark” mortality levels. As  
6 noted in the introduction, CDC data continues to suggest that the cumulative number of CoViD-  
7 19 deaths to date does not fully account for the overall increase in US mortality. However, the  
8 estimation of “excess” deaths directly or indirectly attributable to CoViD-19 can be quite  
9 sensitive to the choice of a benchmark period to represent past mortality conditions. Using the  
10 shiny app from the *Human Mortality Database*,<sup>22</sup> the number of excess deaths for the first half of  
11 2020 in France, for instance, can be estimated to reach approximately 40,000 when years 2000  
12 through 2019 are used to estimate benchmark mortality, whereas using only the most recent year,  
13 2019, for that mortality benchmark, the estimate drops below 30,000—the number of confirmed  
14 CoViD-19 deaths over the same period.<sup>23</sup>

15  
16  
17  
18  
19  
20  
21  
22  
23  
24  
25  
26  
27  
28  
29  
30  
31 The results presented here to illustrate the properties of these period indicators can easily  
32 be customized for different periods, different geographical scales, or to assess their robustness to  
33 these different sources of uncertainty. For tracking the pandemic, for instance, estimating *CCDR*  
34 and *ISCDR* values for more recent periods than the period starting with the first CoViD-19 death  
35 and at a smaller scale than the first subnational division would be necessary. While this can be  
36 done with life-expectancy reductions as well, the value of life expectancy for a short period in a  
37 small geographical area becomes difficult to interpret and additional measures might become  
38 better suited to express the effect of CoViD-19 on longevity.<sup>24 25 26</sup> The *ISCDR* and life-  
39 expectancy reductions are the least data-demanding of the summary indicators of mortality  
40 conditions that allow for comparisons across populations, however, and as crude death rates and  
41  
42  
43  
44  
45  
46  
47  
48  
49  
50  
51  
52  
53  
54  
55  
56  
57  
58  
59  
60

1  
2  
3 life expectancy estimates are widely available, the *CCDR* and life-expectancy reductions readily  
4 allow for temporal comparisons with other-cause mortality.  
5  
6  
7

### 8 9 *Contributorship Statement*

10 Patrick Heuveline designed the study, compiled the necessary demographic data and drafted this  
11 manuscript. Mike Tzen wrote the webscraping routine that provides regularly updated data on  
12 CoViD-19 global estimates and projections, and US age-and-sex pattern.  
13  
14  
15  
16  
17

### 18 19 *Competing Interests*

20 No competing interests.  
21  
22  
23

### 24 25 *Funding*

26 The authors benefited from facilities and resources provided by the California Center for  
27 Population Research at UCLA (CCPR), which receives core support (P2C-HD041022) from the  
28 Eunice Kennedy Shriver National Institute of Child Health and Human Development (NICHD).  
29  
30  
31  
32  
33

### 34 35 *Data Sharing Statement*

36 Additional data are available on the Github repository:  
37  
38 <https://github.com/statsccpr/ind-cov-mort>  
39  
40  
41  
42  
43  
44  
45  
46  
47  
48  
49  
50  
51  
52  
53  
54  
55  
56  
57  
58  
59  
60

1  
2  
3  
4  
5  
6  
7  
8  
9  
10  
11  
12  
13  
14  
15  
16  
17  
18  
19  
20  
21  
22  
23  
24  
25  
26  
27  
28  
29  
30  
31  
32  
33  
34  
35  
36  
37  
38  
39  
40  
41  
42  
43  
44  
45  
46  
47  
48  
49  
50  
51  
52  
53  
54  
55  
56  
57  
58  
59  
60

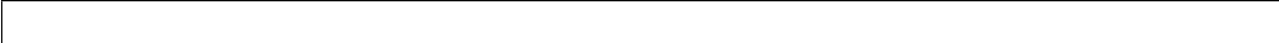

For peer review only

## References

- 1 Brookmeyer R & Gail MH. AIDS epidemiology: a quantitative approach. Oxford, England: Oxford University Press, 1994.
- 2 Centers for Disease Control and Prevention. Excess deaths associated with COVID-19. [https://www.cdc.gov/nchs/nvss/vsrr/covid19/excess\\_deaths.htm](https://www.cdc.gov/nchs/nvss/vsrr/covid19/excess_deaths.htm). Last used June 9, 2020.
- 3 Havers FP, Reed C, Lim T et al. Seroprevalence of antibodies to SARS-CoV-2 in 10 Sites in the United States, March 23-May 12, 2020. *JAMA Intern Med.* 2020, 180(12): 1576-1586. doi: 10.1001/jamainternmed.2020.4130
- 4 Modi C, Boehm V, Ferraro S, et al. How deadly is COVID-19? A rigorous analysis of excess mortality and age-dependent fatality rates in Italy. <https://www.medrxiv.org/content/10.1101/2020.04.15.20067074v3>. May 14, 2020.
- 5 Preston SH, Heuveline P & Guillot M. Demography: measuring and modeling population processes. Blackwell: Malden, MA, Oxford, England & Carlton, Australia, 2001.
- 6 World Health Organization. Daily situation reports. <https://www.who.int/emergencies/diseases/novel-coronavirus-2019/situation-reports/>. Last used June 2, 2020.
- 7 Dong E, Du H & Gardner L. An interactive web-based dashboard to track COVID-19 in real time. *The Lancet Inf Dis* (forthcoming). [https://www.thelancet.com/journals/laninf/article/PIIS1473-3099\(20\)30120-1/fulltext](https://www.thelancet.com/journals/laninf/article/PIIS1473-3099(20)30120-1/fulltext). February 19, 2020.
- 8 United Nations, Department of Economic and Social Affairs, Population Division. World Population Prospects 2019, Online Edition. Rev. <https://population.un.org/wpp/Download/Standard/CSV/>. Last used June 2, 2020.
- 9 Dowd JB, Andriano L, Brazel DM, et al. Demographic science aids in understanding the spread and fatality rates of COVID-19. *PNAS* 2020,117: 9696-8. <https://doi.org/10.1073/pnas.2004911117>
- 10 Centers for Disease Control and Prevention. Provisional COVID-19 death counts by sex, age and state. <https://data.cdc.gov/NCHS/Provisional-COVID-19-Death-Counts-by-Sex-Age-and-S/9bhg-hcku>. Last used June 12, 2020.

- 1  
2  
3  
4  
5  
6  
7  
8  
9  
10  
11  
12  
13  
14  
15  
16  
17  
18  
19  
20  
21  
22  
23  
24  
25  
26  
27  
28  
29  
30  
31  
32  
33  
34  
35  
36  
37  
38  
39  
40  
41  
42  
43  
44  
45  
46  
47  
48  
49  
50  
51  
52  
53  
54  
55  
56  
57  
58  
59  
60
- 
- <sup>11</sup> Beltrán-Sánchez H, Preston SH, Canudas-Romo V. An integrated approach to cause-of-death analysis: Cause-deleted life tables and decompositions of life expectancy. *Demographic Research* 2018, 19(35): 1323-1350. doi: 10.4054/DemRes.2008.19.35
- <sup>12</sup> Ho J. The contribution of drug overdose to educational gradients in life expectancy in the United States, 1992–2011. *Demography* 2017, 54(3): 1175-1202. doi: 10.1007/s13524-017-0565-3
- <sup>13</sup> Kochanek KD., Murphy SL, Xu JQ & Arias E. 2019. Deaths: final data for 2017. NVSR 2019,68(9). Hyattsville, MD: National Center for Health Statistics.
- <sup>14</sup> Arias E, & Xu JQ. United States life tables, 2017. NVSR 2019,68(7). Hyattsville, MD: National Center for Vital Statistics.
- <sup>15</sup> National Institute for Demographic Studies (INED). The demographics of COVID-19 deaths. <https://dc-covid.site.ined.fr/en/>. Last used June 9, 2020.
- <sup>16</sup> Guilmoto CZ. COVID-19 death rates by age and sex and the resulting mortality vulnerability of countries and regions in the world. *MedRxiv* <https://www.medrxiv.org/content/10.1101/2020.05.17.20097410v1>
- <sup>17</sup> Regisgtr Civil. Portal d Transparencia. <https://transparencia.registrocivil.org.br/especial-covid> Last used January 4, 2021.
- <sup>18</sup> Riffe T and Acosta E. COVerAGE-DB: A Database of COVID-19 Cases and Deaths by Age. <https://osf.io/mpwjq/>. Last used December 28, 2020.
- <sup>19</sup> O’Driscoll M, Ribeiro Dos Santos G, Wang L et al. Age-specific mortality and immunity patterns of SARS-CoV-2. *Nature* (2020) doi: 10.1038/s41586-020-2918-0
- <sup>20</sup> Verdery AM, Newmyer L, Wagner B, Margolis R. National profiles of coronavirus disease 2019 mortality risks by age structure and preexisting health conditions. *The Gerontologist* (2020). doi: 10.1093/geront/gnaa152
- <sup>21</sup> P. Hanlon, F. Chadwick, A. Shah et al. “COVID-19 – Exploring the Implications of Long-Term Condition Type and Extent of Multimorbidity on Years of Life Lost: A Modelling Study,” *Welcome Open Res* 5 (2020): 75. doi: 10.12688/wellcomeopenres.15849.1
- <sup>22</sup> Human Mortality Database. 2020. *Short-term Mortality Fluctuations*. <https://mpidr.shinyapps.io/stmortality/>

1  
2  
3  
4 <sup>23</sup> Guillot M, Khlal M. 2020. Epidémie de Covid-19: quell impact sur l'espérance de vie en France?

5  
6 <https://theconversation.com/epidemie-de-covid-19-quell-impact-sur-lesperance-de-vie-en-france-141484>. Last  
7  
8 used July 1, 2020  
9

10 <sup>24</sup> J. R. Goldstein, R. D. Lee. 2020. "Demographic Perspectives on the Mortality of COVID-19 and Other  
11  
12 Epidemics," *Proc. Natl Acad. Sci.* **117**, 36 (2020): 22035. doi: 10.1073/pnas.2006392117  
13

14 <sup>25</sup> H. Pifarré i Arolas, M. Myrskylä, A. Lo et al. "Global Years of Life Lost to COVID-19," *MedRxiv*. doi:  
15  
16 10.1101/2020.06.19.20136069  
17

18 <sup>26</sup> P. Heuveline. "The Mean Unfulfilled Lifespan (MUL): A New Indicator of a Disease Impact on the Individual  
19  
20 Lifespan," *MedRxiv*. doi: 10.1101/2020.08.09.20171264v3 (December 17, 2000)  
21  
22  
23  
24  
25  
26  
27  
28  
29  
30  
31  
32  
33  
34  
35  
36  
37  
38  
39  
40  
41  
42  
43  
44  
45  
46  
47  
48  
49  
50  
51  
52  
53  
54  
55  
56  
57  
58  
59  
60

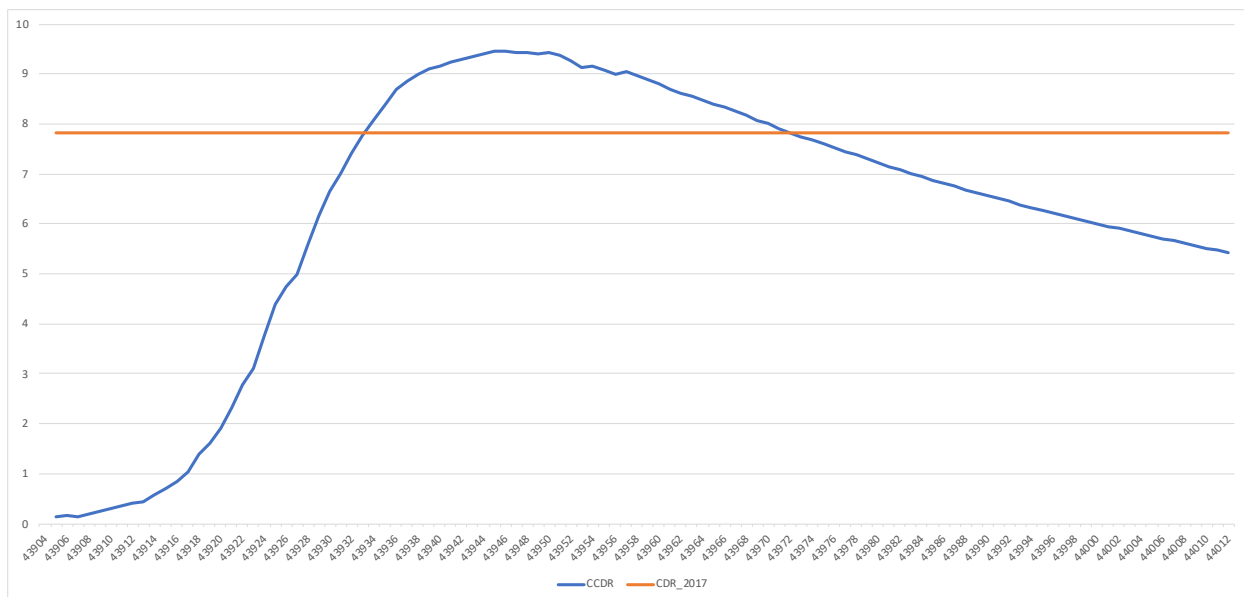

Peer review only



1  
2  
3  
4  
5  
6  
7  
8  
9  
10  
11  
12  
13  
14  
15  
16  
17  
18  
19  
20  
21  
22  
23  
24  
25  
26  
27  
28  
29  
30  
31  
32  
33  
34  
35  
36  
37  
38  
39  
40  
41  
42  
43  
44  
45  
46  
47  
48  
49  
50  
51  
52  
53  
54  
55  
56  
57  
58  
59  
60

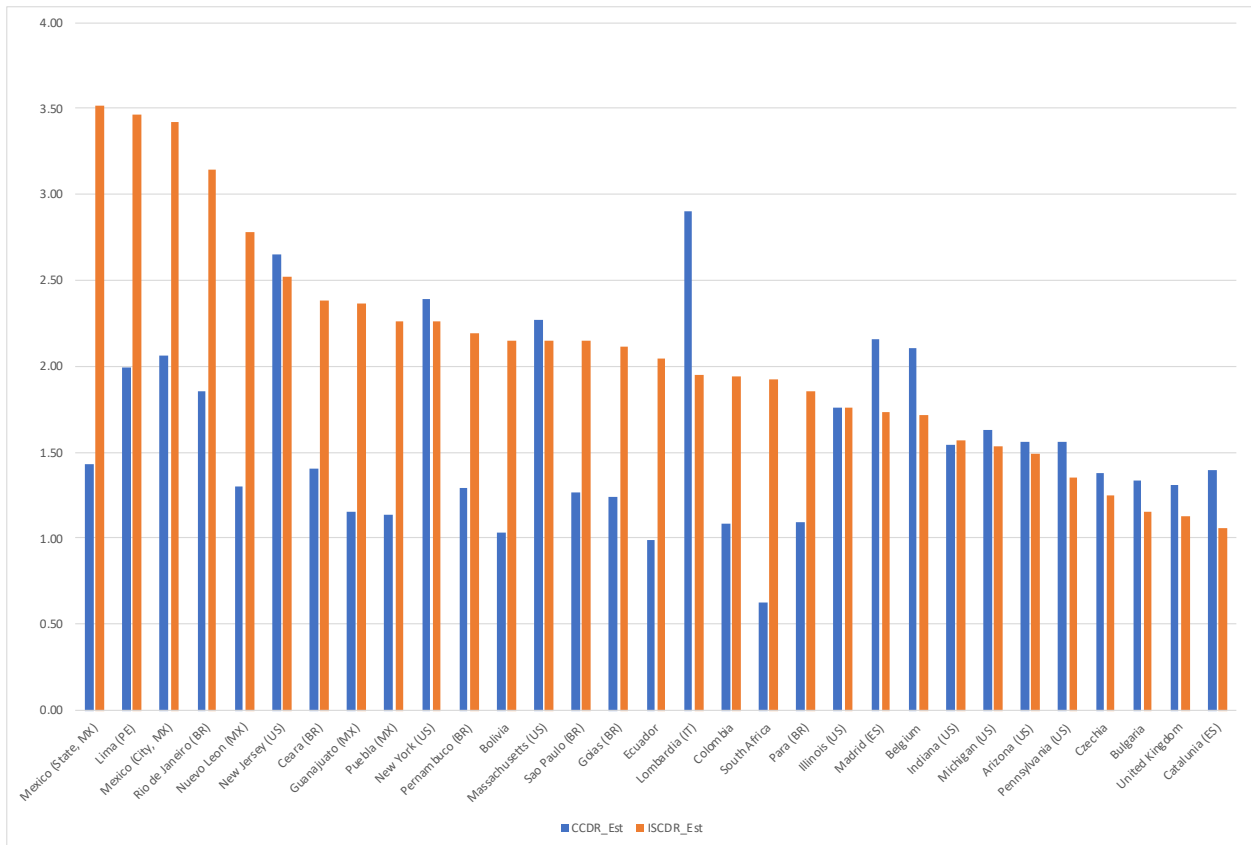

Review only

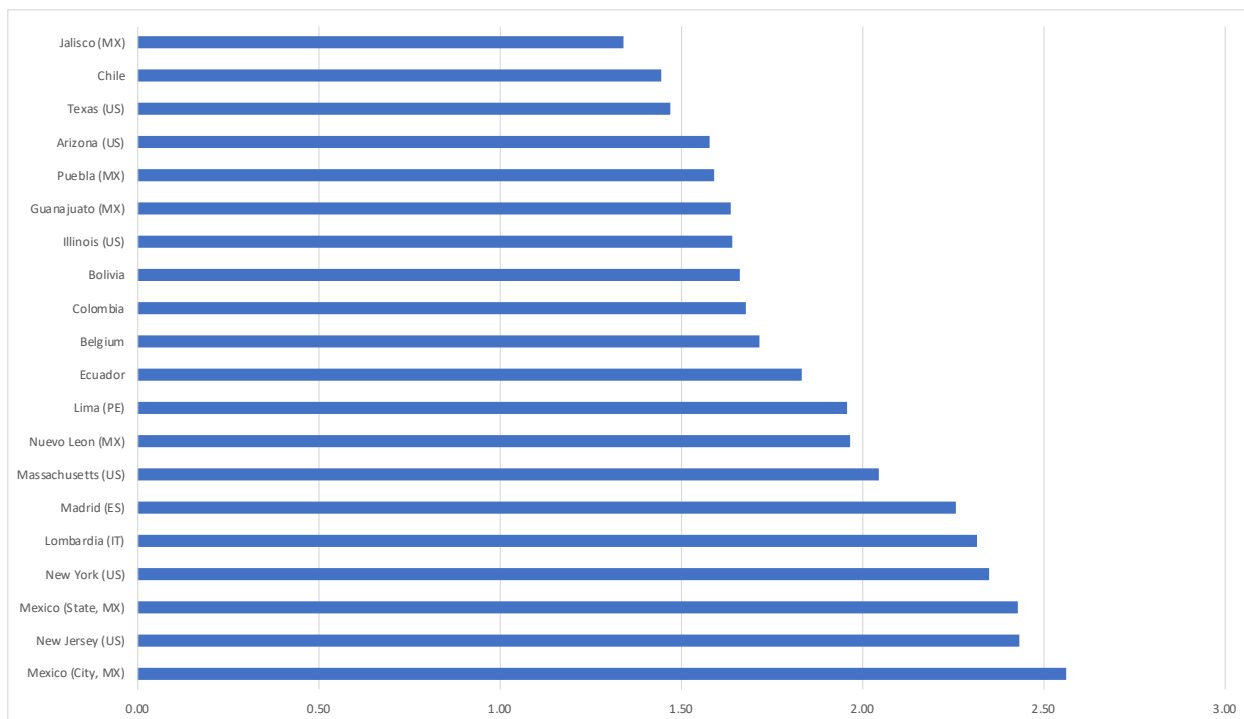

Peer review only

1  
2  
3  
4  
5  
6  
7  
8  
9  
10  
11  
12  
13  
14  
15  
16  
17  
18  
19  
20  
21  
22  
23  
24  
25  
26  
27  
28  
29  
30  
31  
32  
33  
34  
35  
36  
37  
38  
39  
40  
41  
42  
43  
44  
45  
46  
47  
48  
49  
50  
51  
52  
53  
54  
55  
56  
57  
58  
59  
60

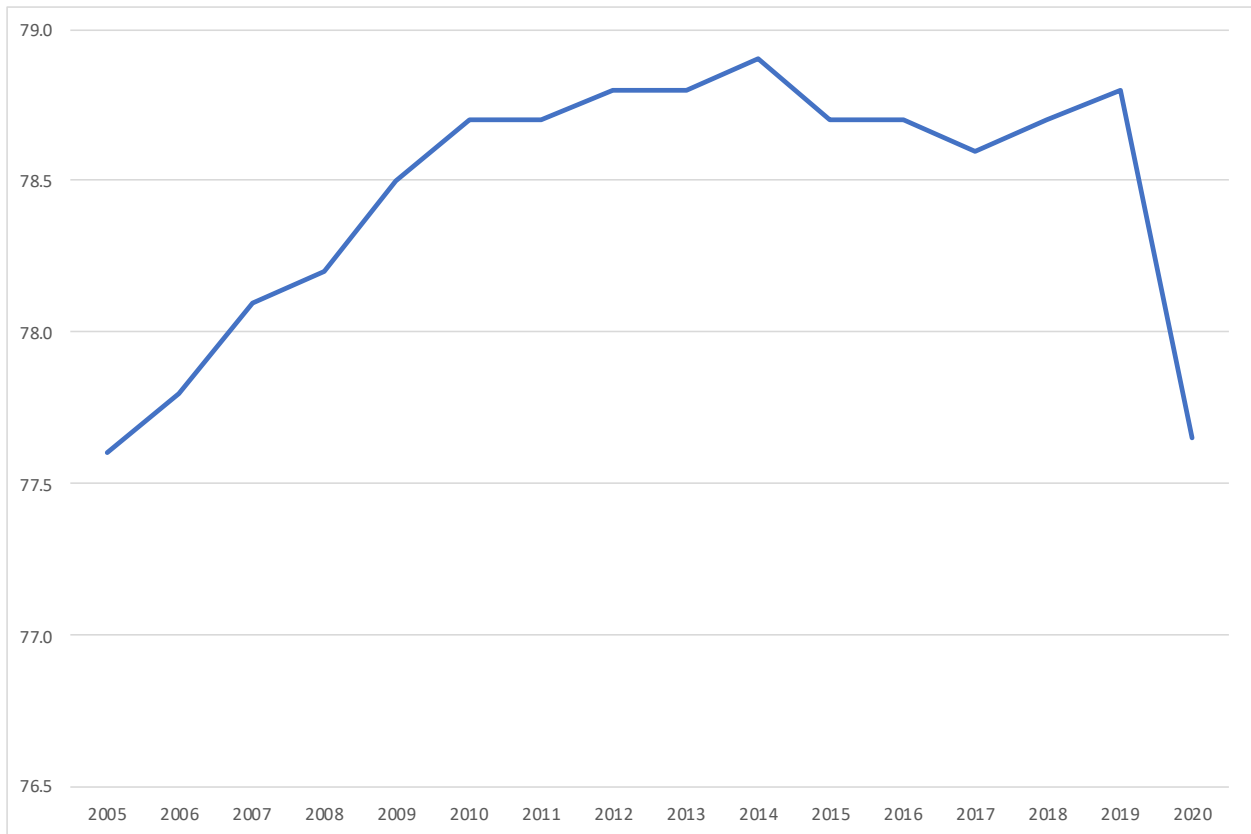

Review only

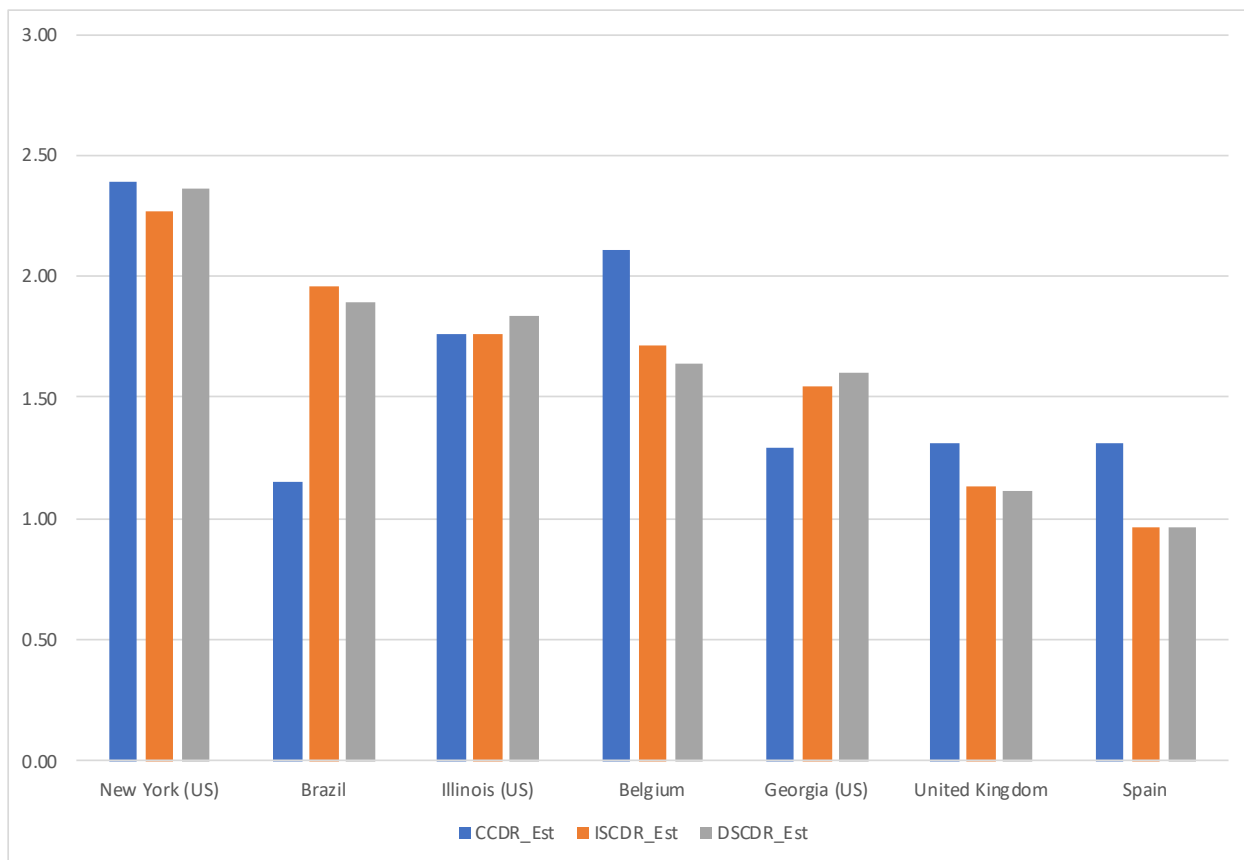

Review only

## Beyond Deaths per Capita:

### Technical Appendix

Updated Version, 1/2/2021

Patrick Heuveline, Ph.D. and Michael Tzen, M.Sc.

California Center for Population Research (CCPR)

University of California, Los Angeles (UCLA)

#### Part A. Mortality Indicators

##### Section 1. Period Crude CoViD-19 Death Rate (CCDR)

- 1.1 Get current estimate date and cumulative number of CoViD-19 deaths by UN country/territory, , and subnational entities with at least one reported case by June 1, 2020 in Brazil, China, Italy, Mexico, Peru, Spain and the USA (all locations thereafter) from: <https://coronavirus.jhu.edu/>
- 1.2 Get date of first CoViD-19 death and total mid-2020 population size for all locations in (1.1) (see part B for example)
- 1.3 Calculate exposure in person-years for all locations in (1.1) as:
 
$$N.T$$
 where  $N$  is total population size in (1.3) and  $T$  is year-to-date duration in year converted from dates in (1.1) & (1.2)
- 1.4 Calculate the estimated period Crude CoViD-19 Death Rate (CCDR) for all locations in (1.1) and projected CCDR for all locations in (1.2) as ratios of deaths in (1.1) & (1.2) to exposure in (1.3)

##### Section 2. Comparative CoViD-19 Mortality Ratio (CCMR)

- 2.1 Get report date and number of reported CoViD-19 deaths by sex and age group from: <https://data.cdc.gov/NCHS/Provisional-COVID-19-Death-Counts-by-Sex-Age-and-S/9bhg-hcku>
- 2.2 Get the mid-2020 population size by age groups,  $nN_x$ , for each sex and the same age groups as in (2.1) for all locations in (1.1) (see part B for example)
- 2.3 Calculate age-and-sex-specific CoViD-19 death rates for the USA using the estimate date of first CoViD-19 death and estimated number of CoViD-19 deaths in the country in (1.1), the distribution of deaths by sex and age group in (2.1) and the mid-2020 population by sex and age group in the country in (2.2) as:

$${}_nD_x^C / {}_nN_x.T$$

where (separately for males and females)  ${}_nN_x$  is the mid-2020 population in age group  $x$  to  $x+n$  in (2.2),  $T$  is the duration of exposure in (1.4) and  ${}_nD_x^C$  is the number of CoViD-19 deaths in (1.1) multiplied by the ratio of deaths in the age group to total deaths in (2.1)

- 2.4 Calculate estimated counterfactual numbers of CoViD-19 deaths for all locations in (1.1) using the sex and age-specific CoViD-19 death rates for the USA in (2.3) and the mid-2020 population by sex and age group in (2.2)
- 2.5 Calculate the Comparative CoViD-19 Mortality Ratio (CCMR) for estimated numbers of CoViD-19 deaths for all locations in (1.1) as the ratio of the actual estimate in (1.1) to the corresponding counterfactual number in (2.4)

### Section 3. Estimated Reduction in 2020-Life Expectancies

- 3.1 Get period life-table age-specific death rates ( ${}_nm_x$ ) and survival probabilities ( ${}_np_x$ ) for year-2020 for each country in (1.1) (see part B for example)
- 3.2 Calculate the age-specific ratio of updated to previously projected deaths from all causes in 2020 for each country in (1.1) as:

$${}_nR_x = \frac{{}_nm_x \cdot ({}_nN_x - ((1 - \bar{t}_m) \cdot {}_nD_x^C)) + {}_nD_x^C}{{}_nm_x \cdot {}_nN_x}$$

where  ${}_nm_x$  is the age-specific death rate in the previously projected year-2020 life table from (3.1),  ${}_nN_x$  is the mid-2020 population by age group from (2.2),  ${}_nD_x^C$  is the estimated number of CoViD-19 deaths in the age group obtained by multiplying the total for the Country in (1.2) by the ratio of deaths in the age group to total deaths in the USA in (2.1) and  $\bar{t}_m$  is the fraction of a year corresponding to the average time of CoViD-19 deaths estimated here as the mid-point between the first CoViD-19 death in the country and the end date of the projection (January 1, 2021 as of this writing)

${}_nD_x^C$  is obtained by multiplying  ${}_nN_x$ , first, by the corresponding age-and-sex-specific CoViD-19 death rate for the USA in (2.3) and, second, by a scaling factor, identical across all sex- and age-groups, to bring the sum of the estimated number of CoViD-19 deaths across all sex- and age-groups to equal the total estimated number of CoViD-19 deaths in the population. (The scaling factor is the ratio of the total estimated number of CoViD-19 deaths in the population divided by the sum of the products of  ${}_nN_x$  by the corresponding age-and-sex-specific CoViD-19 death rate for the USA)

- 3.3 Calculate age-specific survival probabilities in the new projected year-2020 life table for each country in (1.1) from (3.1) & (3.2) using Chiang (1968) formula:

$${}^*np_x = {}_np_x \cdot {}_nR_x$$

- 3.4 Calculate the age-specific number of years lived after age  $x$  for individuals dying in the age interval ( ${}_na_x$  values) in the new projected year-2020 life table for each country in (1.1) from its corresponding value in the previously projected year-2020 life table derived from (3.1) and the life table relationship:

$${}_na_x = \frac{1}{{}_nm_x} - n \cdot \frac{{}_np_x}{1 - {}_np_x}$$

and from (3.2) & (3.3) using the Preston et al. (2001: 84) formula:

$${}^*a_x = n + \left( {}_nR_x \cdot \frac{{}_nq_x}{{}^*a_x} \cdot ({}_na_x - n) \right)$$

where  ${}_nq_x$  is  $1 - {}_np_x$ , and

$${}^*a_{85+} = \frac{a_{85+}}{R_{85+}}$$

3.5 Calculate new values of life expectancies ( $e_x^o$  values) in the year-2020 life table for all locations in (1.2) starting with  $e_x^o = {}^*a_{85+}$  in (3.4) and then using values in (3.3) & (3.4) with the life table relationship:

$$e_x^o = {}_np_x \cdot (e_{x+n}^o + n) + {}_na_x \cdot (1 - {}_np_x)$$

3.6 Calculate the difference between the new values of life expectancies in year-2020 life table in (3.5) and the original values derived from values in (3.1) for all locations in (1.2) and the life table relationship:

$$e_x^o = ({}_np_x \cdot e_{x+n}^o) + \frac{1}{{}_nm_x} \cdot (1 - {}_np_x)$$

## Part B. Demographic Parameters

### Section 1. Mid-2020 Population Size

1.1 (Step 1.3 in part A) Total mid-2020 population size for each UN country and territory was obtained from the "Total Population" file at:

<https://population.un.org/wpp/Download/Standard/CSV/>

1.1.a For provinces in China, the mid-2020 population size for the country was multiplied by the ratio of the 2019-year-end total population estimates for the province divided by the corresponding estimates for the country obtained at:

<http://data.stats.gov.cn>

1.1.b For US states, the total population size was obtained by adding across sex- and age-groups, with the mid-2020 size of each sex- and age-group for the country being multiplied by the ratio of the 2018-sex-and-age-group sizes estimated for the state divided by the corresponding estimate for the country obtained at:

<https://data.census.gov/cedsci/table?q=United%20States&g=0100000US&tid=ACSDP1Y2018.DP05&hidePreview=true&table=DP05>

1.1.c For Brazilian states, the mid-2020 population size for the country was multiplied by the ratio of the 2019-year-end total population estimates for the state divided by the corresponding estimates for the country obtained from the Brazil Statistical Office (IBGE) at: <https://www.ibge.gov.br/en/cities-and-states.html?view=municipio>

1.1.d For Italian regions, the total population size was obtained by adding across sex- and age-groups, with the mid-2020 size of each sex- and age-group for the country being multiplied by the ratio of the 2019-age-group sizes estimated for the region divided by the corresponding estimate for the country obtained from IStat at:

<http://demo.istat.it/tvm2016/index.php>

1  
2  
3  
4  
5  
6  
7  
8  
9  
10  
11  
12  
13  
14  
15  
16  
17  
18  
19  
20  
21  
22  
23  
24  
25  
26  
27  
28  
29  
30  
31  
32  
33  
34  
35  
36  
37  
38  
39  
40  
41  
42  
43  
44  
45  
46  
47  
48  
49  
50  
51  
52  
53  
54  
55  
56  
57  
58  
59  
60

1.1.e For Spanish autonomous communities, the total population size was obtained by adding across sex- and age-groups, with the mid-2020 size of each sex- and age-group being multiplied by the ratio of the 2019-age-group sizes estimated for the community divided by the corresponding estimate for the country obtained from Instituto Nacional Estadística (INE) at:

[https://www.ine.es/dyngs/INEbase/en/categoria.htm?c=Estadistica\\_P&cid=1254734710984](https://www.ine.es/dyngs/INEbase/en/categoria.htm?c=Estadistica_P&cid=1254734710984)

1.1.f For Mexican states, the total population size was obtained by adding across sex- and age-groups, with the mid-2020 size of each sex- and age-group being multiplied by the ratio of the 2010-age-group sizes estimated for the state divided by the corresponding estimate for the country obtained from Instituto Nacional de Estadística y Geografía (INEGI) at:

<https://en.www.inegi.org.mx/temas/estructura/default.html#Tabulados>

1.1.g For Peruvian *departamentos*, the total population size was obtained by adding across sex- and age-groups, with the mid-2020 size of each sex- and age-group being multiplied by the ratio of the 2017-age-group sizes estimated for the state divided by the corresponding estimate for the country obtained from El Instituto Nacional de Estadística e Informática (INEI):

<https://www.inei.gob.pe>

1.2 (Step 1.2 in part A) Dates of first CoViD-19 case and death for UN countries and territories and for provinces in China were retrieved from the World Health Organization's daily situation reports at <https://www.who.int/emergencies/diseases/novel-coronavirus-2019/situation-reports/>

1.2.a. For other sub-national populations, dates were obtained from the Institute for Health Metrics and Evaluation at <https://covid19.healthdata.org>

1.2.b. For Peruvian *departamentos*, dates were not available from IHME and assumed to all be the same as the date of the first CoViD-19 death in the country.

1.3 (step 2.2. in part A) For UN countries and territories with a population size over 90,000, mid-2020 population size by sex- and age-group was obtained from the "Population by Age and Sex" file at: <https://population.un.org/wpp/Download/Standard/CSV/> with the following adjustments:

1.3.a Number of infants (under age 1) for each of these UN countries and territories was obtained from the "Annual Population by Age – Both Sexes" file at:

<https://population.un.org/wpp/Download/Standard/CSV/>

1.3.b Number in age group 1-4 for each of these UN countries and territories was obtained as the difference between the number in the first age group (age 0-4) in the population by 5-year age groups in (1.3) above and the number of infants in (1.3.a) above

1.3.c Numbers in age groups 5-14 to 75-84 for each of these UN countries and territories were obtained by adding the numbers in two consecutive age groups (e.g., ages 5-9 and ages 10-14) in the population by 5-year age groups in (1.3) above

1.3.d Number in age group 85 and over for each of these UN countries and territories was obtained by adding the numbers in the last four age groups (i.e., ages 85-89, 90-94, 95-99 and 100+) in the population by 5-year age groups in (1.3) above



- 1  
2  
3 1.3.e For sub-national populations in Brazil and China, the total population size from  
4 (1.1.a) or (1.1.c) above was multiplied by the ratio of the national mid-2020  
5 estimates for the sex- and age-group and for the total population (for the USA, Italy,  
6 Spain, Mexico and Peru, see (1.1.b), (1.1.d), (1.1.e), (1.1.f) and (1.1.g) above)  
7  
8

## 9 Section 2. Calendar-Year-2020 Period Life Table Values

10 2.1 (Step 3.1 in part A) The period life-table age-specific survival probabilities ( ${}_n p_x$ ) for year-2020  
11 for each country in (1.3) above are obtained from the corresponding values in the estimated  
12 2015-20 and projected 2020-25 life tables in the “Life table survivors ( $l_x$ ) at exact age  $x$  -  
13 Both Sexes” file at:

14 <https://population.un.org/wpp/Download/Standard/CSV/>

15 2.1.a Age-specific survival probabilities ( ${}_n p_x$ ) in the estimated 2015-20 and projected 2020-  
16 25 life tables for each country in (1.3) above are obtained from the number of  
17 survivors by age ( $l_x$ ) and the life table relationship:  
18

$$19 \quad {}_n p_x = \frac{l_{x+n}}{l_x}$$

20 2.1.b Period life-table age-specific survival probabilities ( ${}_n p_x$ ) for year-2020 for each  
21 country in (1.3) above are obtained as:

$$22 \quad {}_n p_x[2020] = \sqrt{{}_n p_x[2015 - 2020] \cdot {}_n p_x[2020 - 2025]}$$

23 2.2 (step 3.1 in part A) The period life-table age-specific death rates ( ${}_n m_x$ ) for year-2020 for each  
24 country in (1.3) above are obtained from the corresponding values in the estimated 2015-20  
25 and projected 2020-25 life tables in the “Life table survivors  $l(x)$  at exact age  $x$ ” and “life  
26 expectancy at exact age  $x$ ” files at:

27 <https://population.un.org/wpp/Download/Standard/CSV/>

28 2.2.a Age-specific death rates ( ${}_n m_x$ ) in the estimated 2015-20 and projected 2020-25 life  
29 tables for each country in (1.3) above are obtained the male/female number of  
30 survivors by age ( $l_x$ ) and the male/female life expectancy by age ( $e_x^o$ ) and the life  
31 table relationships:  
32

$$33 \quad {}_n m_x = \frac{l_x - l_{x+n}}{(l_x \cdot e_x^o) - (l_{x+n} \cdot e_{x+n}^o)}$$

34 and

$$35 \quad m_{x+} = \frac{1}{e_x^o}$$

36 2.2.b Period life-table male/female age-specific death rates ( ${}_n m_x$ ) and survival probabilities  
37 ( ${}_n p_x$ ) for year-2020 for each country in (1.3) above are obtained as:

$$38 \quad {}_n m_x[2020] = ({}_n m_x[2015-20] + {}_n m_x[2020-25]) / 2$$

39 2.2.c For US states, age-specific death rates ( ${}_n m_x$ ) for 2016 at ages above age 25 were  
40 obtained from: <https://wonder.cdc.gov/controller/datarequest/D140>. Under age 25,  
41 age-specific death rates are unreliable in some states and the rates in all states were  
42 thus assumed to equal the rate at the same age in the country (the assumption  
43 should have negligible impact on CoViD-19 mortality assessments). The 2016 age-  
44 specific death rates for each sex, age group and state were thus prorated using the  
45  
46  
47  
48  
49  
50  
51  
52  
53  
54  
55  
56  
57  
58  
59  
60

ratio of 2020/2016 age-specific death rate for the same sex and age group in the country.

2.2.d For Italian regions and Spanish autonomous communities, 2018 (Italy) and 2019 (Spain) life tables were obtained from IStat and INE (see 1.1 above). The 2018 (or 2019) age-specific death rates for each sex, age group and region/community were prorated using the ratio of 2020/2018 (or 2019) age-specific death rate for the same sex and age group in the country. The 2020 life tables were then completed assuming no change in the  ${}_n a_x$  from 2018 (or 2019)

2.2.e For Mexican states, 2020 life tables were taken directly from those produced by Partida Bush & García Guerrero (2018) for the UN Population Fund:

Partida Bush, V.G. and García Guerrero, V. (2018). Proyecciones de la Población de México y sus Entidades Federativas 2016–2050. Consejo Nacional de Población, Fondo de Población de Naciones Unidas.

2.2.f For Peruvian *departamentos*, 2020 life tables were interpolated as described in 2.2.a & 2.2.b from projected life tables for 2015-2020 and 2020-2025 obtained from El Instituto Nacional de Estadística e Informática (INEI) at:

<http://proyectos.inei.gob.pe/web/biblioineipub/bancopub/Est/Lib0901/index.htm>

1  
2  
3  
4  
5  
6  
7  
8  
9  
10  
11  
12  
13  
14  
15  
16  
17  
18  
19  
20  
21  
22  
23  
24  
25  
26  
27  
28  
29  
30  
31  
32  
33  
34  
35  
36  
37  
38  
39  
40  
41  
42  
43  
44  
45  
46  
47  
48  
49  
50  
51  
52  
53  
54  
55  
56  
57  
58  
59  
60

**Beyond Deaths per Capita:  
An Example (Brazil), part A**

Patrick Heuveline, Ph.D. and Michael Tzen, M.S.  
California Center for Population Research (CCPR)  
University of California, Los Angeles (UCLA)

For peer review only

This file and associated Excel spreadsheet illustrate the calculations of the indicators for Brazil

Fixed demographic parameters (Part B in Technical Appendix)

Section 1: Mid-2020 Population Size

Step 1.1: From the source <https://population.un.org/wpp/Download/Standard/CSV/>  
Get the file for Total Population, All variants  
Keep the estimates for 2020, medium variant, all countries and territories

Example: For Brazil, 1 number

Total population, 2020 See spreadsheet, row 15

Step 1.2: From the source <https://www.who.int/emergencies/diseases/novel-coronavirus-2019/situation-reports/>  
Determine date of first CoViD-19 death for all UN countries and territories

Example: For Brazil, 1 date (month, day, year)

Date of first death See spreadsheet, row 19

Step 1.3: From the source <https://population.un.org/wpp/Download/Standard/CSV/>  
Get the file for Population by Age and Sex, Medium variant, annual from 1950 to 2100  
Keep the estimates for 2020, all countries and territories

Example: For Brazil, 2 vectors

Males, 2020 See spreadsheet, row 24

Females, 2020 See spreadsheet, row 25

Step 1.3.a: From the source <https://population.un.org/wpp/Download/Standard/CSV/>  
Get the file for Population by Age and Sex, Medium variant, annual projections from 2020 to 2100  
Keep the estimates for infants (age <1) & 2020, all countries and territories

Example: For Brazil, 2 numbers

Male infants, 2020 See spreadsheet, row 30

Female infants, 2020 See spreadsheet, row 31

Step 1.3.b: Get children 1-4 from children 0-4 & infants

Example: For Brazil, 2 numbers

Males 1-4, 2020 See spreadsheet, row 34

Females 1-4, 2020 See spreadsheet, row 35

Step 1.3.c: Get population 5-84 in 10-year age groups

Example: For Brazil, 2 vectors

Males 5-74, 2020 See spreadsheet, row 38

Females 5-74, 2020 See spreadsheet, row 39

Step 1.3.d: Get population 85+

Example: For Brazil, 2 numbers

Males 85+, 2020 See spreadsheet, row 42

Females 85+, 2020 See spreadsheet, row 43

Section 2: Calendar-Year-2020 Period Life Table Values

Step 2.1: From the source <https://population.un.org/wpp/Download/Standard/CSV/>  
Get the file for Life Table, Medium variant  
Keep the estimates for lx & ex, periods 2015-20 & 2020-25, all countries and territories

1  
2  
3 Example: For Brazil, 8 vectors  
4 lx, males, 2015-20 See spreadsheet, row 49  
5 lx, females, 2015-20 See spreadsheet, row 50  
6 lx, males, 2020-25 See spreadsheet, row 51  
7 lx, females, 2020-25 See spreadsheet, row 52  
8 ex, males, 2015-20 See spreadsheet, row 53  
9 ex, females, 2015-20 See spreadsheet, row 54  
10 ex, males, 2020-25 See spreadsheet, row 55  
11 ex, females, 2020-25 See spreadsheet, row 56  
12 Step 2.1.a: Get npx from lx  
13 Example: For Brazil, 4 vectors (10 values for x=0, 1, 5, 15, 25, 35, 45, 55, 65 & 75)  
14 npx, males, 2015-20 See spreadsheet, row 59  
15 npx, females, 2015-20 See spreadsheet, row 60  
16 npx, males, 2020-25 See spreadsheet, row 61  
17 npx, females, 2020-25 See spreadsheet, row 62  
18 Step 2.1.b: Get npx for 2020 from npx for 2015-20 & npx for 2020-25  
19 Example: For Brazil, 2 vectors  
20 npx, males, 2020 See spreadsheet, row 65  
21 npx, females, 2020 See spreadsheet, row 66  
22 Step 2.2  
23 Step 2.2.a: Get nm<sub>x</sub> from lx & ex  
24 Example: For Brazil, 4 vectors (11 values for x=0, 1, 5, 15, 25, 35, 45, 55, 65, 75 & 85)  
25 nm<sub>x</sub>, males, 2015-20 See spreadsheet, row 70  
26 nm<sub>x</sub>, females, 2015-20 See spreadsheet, row 71  
27 nm<sub>x</sub>, males, 2020-25 See spreadsheet, row 72  
28 nm<sub>x</sub>, females, 2020-25 See spreadsheet, row 73  
29 Step 2.2.b: Get nm<sub>x</sub> for 2020 from nm<sub>x</sub> for 2015-20 & nm<sub>x</sub> for 2020-25  
30 Example: For Brazil, 2 vectors  
31 nm<sub>x</sub>, males, 2020 See spreadsheet, row 76  
32 nm<sub>x</sub>, females, 2020 See spreadsheet, row 77  
33  
34  
35  
36  
37  
38

### Updated Mortality Indicators (Part A in Technical Appendix)

Note: indicators below based on 1/1/2021 data updates

#### Section 1: *CCDR*

Step 1.1: From the source <https://coronavirus.jhu.edu/>  
Get current estimate date & cumulative number of covid-19 deaths  
Keep the estimates for all UN countries and territories

Example: For Brazil, 1 number & 1 date (month/day/year)

Death estimate See spreadsheet, row 84

Date of estimate See spreadsheet, row 85

For USA, 1 number & 1 date (month/day/year)

Death estimate See spreadsheet, row 88

Date of estimate See spreadsheet, row 89

Step 1.2: From fixed demographic indicators

Get date of first CoViD-19 death and total mid-2020 population size for all locations in (1.1)

Example: For Brazil, 1 number & 1 date (month/day/year)

Total population, 2020 See spreadsheet, row 93 (from row 15)

Date of first death See spreadsheet, row 94 (from row 19)

Example: For USA, 1 number & 1 date (month/day/year)

Total population, 2020 See spreadsheet, row 96

Date of first death See spreadsheet, row 97

Note: Number & date for USA obtained as described above for Brazil

Step 1.3: Calculate exposure in person-years for all locations in (1.1)

Example: For Brazil, 1 number

Person-years See spreadsheet, row 100

Example: For USA, 1 number

Person-years See spreadsheet, row 102

Note: The number of days was calculated using the ISOdate function in R

Step 1.4: Calculate the estimated period Crude Covid-19 Death Rate (*CCDR*) for all locations in (1.1)

Example: For Brazil, 1 number

*CCDR* See spreadsheet, row 105

Section 2: *CCMR*

Step 2.1: From the source <https://data.cdc.gov/NCHS/Provisional-COVID-19-Death-Counts-by-Sex-Age-and-S/9bhg-hcku>

Get report date and number of reported covid-19 deaths by sex and age group

Example: 2 vectors & 1 date (month/day/year)

Male deaths See spreadsheet, row 110

Female deaths See spreadsheet, row 111

Date of estimate See spreadsheet, row 112

Step 2.2: From fixed demographic indicators

Get the mid-2020 population size by age groups for all locations in (1.1)

Example: For Brazil, 2 vectors

Males by age group, 2020 See spreadsheet, row 111 (from rows 30, 34, 38 & 42)

Females by age group, 2020 See spreadsheet, row 112 (from rows 31, 35, 39 & 43)

For USA, 2 vectors

Males by age group, 2020 See spreadsheet, row 119

Females by age group, 2020 See spreadsheet, row 120

Note: Vectors for USA obtained as described above for Brazil

Step 2.3: Calculate age-and-sex-specific covid-19 death rates for the USA

Example: For USA, 2 vectors

Male rates See spreadsheet, row 123

Female rates See spreadsheet, row 124

Step 2.4: Calculate estimated counterfactual numbers of covid-19 deaths for all locations in (1.1)

Example: For Brazil, 2 vectors

Male deaths by age group See spreadsheet, row 127

Female deaths by age group See spreadsheet, row 128

1  
2  
3 Step 2.5: Calculate the Comparative Covid-19 Mortality Ratio (CCMR) for estimated  
4 numbers of covid-19 deaths for all locations in (1.1)

5 Example: For Brazil, 1 number

6 CCMR See spreadsheet, row 131

7  
8 Section 3: Estimated Reduction in 2020-Life Expectancies

9 Step 3.1: From fixed demographic indicators

10 Get period life-table age-specific death rates ( $nmx$ ) and survival probabilities  
11 ( $npx$ ) for year-2020 for each country in (1.1)

12 Example: For Brazil, 4 vectors

13  $npx$ , males, 2020 See spreadsheet, row 136 (from row 65)

14  $npx$ , females, 2020 See spreadsheet, row 137 (from row 66)

15  $nmx$ , males, 2020 See spreadsheet, row 138 (from row 76)

16  $nmx$ , females, 2020 See spreadsheet, row 139 (from row 77)

17 Step 3.2: Calculate the age-specific ratio of updated to previously projected deaths from all  
18 causes in 2020 for each country in (1.1)

19 Example: For Brazil, 2 vectors

20  $nRx$ , males See spreadsheet, row 142

21  $nRx$ , females See spreadsheet, row 143

22 Step 3.3: Calculate age-specific survival probabilities in the new projected year-2020 life  
23 table for each country in (1.1)

24 Example: For Brazil, 2 vectors

25  $*npx$ , males See spreadsheet, row 146

26  $*npx$ , females See spreadsheet, row 147

27 Step 3.4: Calculate the age-specific number of years lived after age  $x$  for individuals dying  
28 in the age interval in the new projected year-2020 life table for each country in (1.1)

29 Example: For Brazil, 2 vectors

30  $*nax$ , males See spreadsheet, row 150

31  $*nax$ , females See spreadsheet, row 151

32 Step 3.5: Calculate new values of life expectancies ( $e_x^o$  values) in the year-2020 life table  
33 for all locations in (1.2)

34 Example: For Brazil, 2 vectors

35  $ex$ , males See spreadsheet, row 154

36  $ex$ , females See spreadsheet, row 155

37 Step 3.6: Calculate the difference between the new values of life expectancies in year-2020  
38 life table and the original values

39 Example: For Brazil, 3 vectors

40 Diff in  $ex$ , males See spreadsheet, row 154

41 Diff in  $ex$ , females See spreadsheet, row 155

42 Diff in  $ex$ , both sexes See spreadsheet, row 156

1 **Beyond Deaths per Capita: Comparative CoViD-19 Mortality Indicators**  
 2 **Supplementary Information: An Example Brazil), part B**

3 Patrick Heuveline, Ph.D. and Michael Tzen, M.S.  
 4 California Center for Population Research (CCPR)  
 5 University of California, Los Angeles (UCLA)  
 6  
 7  
 8

9 This file and associated Word document illustrate the calculations of the indicators for Brazil based on 1/1/2021 data updates  
 10

11 Fixed demographic parameters (Part B in Technical Appendix)

12 Section 1 Mid-2020 Population Size

- 13 1.1 From the source <https://population.un.org/wpp/Download/Standard/CSV/>  
 14 Get the file for Total Population, All variants  
 15 Keep the estimates for 2020, medium variant, all countries

16 Example For Brazil, 1 number (in thousands)

17 Total population, 2020 212559.409

- 18 1.2 From the source <https://www.who.int/emergencies/diseases/novel-coronavirus-2019/situation-reports/>  
 19 Determine date of first CoViD-19 death for UN countries and territories

20 Example For Brazil, 1 date (month/day/year)

21 Date of first death 3 17 2020

- 22 1.3 From the source <https://population.un.org/wpp/Download/Standard/CSV/>  
 23 Get the file for Population by Age and Sex, Medium variant, annual from 1950 to 2010  
 24 Keep the estimates for 2020, all countries

25 Example For Brazil, 2 vectors

26 Males, 2020 7404.646 7464.84 7623.386 8253.31 8685.557 8534.004 8571.684 8593.722

27 Females, 2020 7070.447 7136.977 7319.056 7964.694 8466.492 8418.59 8576.223 8735.133

- 28 1.3.a From the source <https://population.un.org/wpp/Download/Standard/CSV/>  
 29 Get the file for Population by Age and Sex, Medium variant, annual from 1950 to 2010  
 30 Keep the estimates for 2020, all countries

31 Example For Brazil, 2 numbers

32 Male infants, 2020 1468.3

33 Female infants, 2020 1402.62

- 34 1.3.b Get children 1-4 from children 0-4 & infants

35 Example For Brazil, 2 numbers  
 36  
 37  
 38  
 39  
 40  
 41  
 42  
 43  
 44  
 45  
 46  
 47



|    |                       |                                                                                                                                             |           |           |           |           |           |           |           |
|----|-----------------------|---------------------------------------------------------------------------------------------------------------------------------------------|-----------|-----------|-----------|-----------|-----------|-----------|-----------|
| 1  |                       |                                                                                                                                             |           |           |           |           |           |           |           |
| 2  | Males 1-4, 2020       | 5936.346                                                                                                                                    |           |           |           |           |           |           |           |
| 3  | Females 1-4, 2020     | 5667.827                                                                                                                                    |           |           |           |           |           |           |           |
| 4  | 1.3.c                 | Get population 5-74 in 10-year age groups                                                                                                   |           |           |           |           |           |           |           |
| 5  | Example               | For Brazil, 2 vectors                                                                                                                       |           |           |           |           |           |           |           |
| 7  | Males 5-84, 2020      | 15088.226                                                                                                                                   | 16938.867 | 17105.688 | 16298.25  | 12892.572 | 9931.736  | 5745.946  | 2402.447  |
| 8  | Females 5-84, 2020    | 14456.033                                                                                                                                   | 16431.186 | 16994.813 | 16691.918 | 13731.053 | 11134.693 | 6992.176  | 3406.893  |
| 9  | 1.3.d                 | Get population 85+                                                                                                                          |           |           |           |           |           |           |           |
| 10 | Example               | For Brazil, 2 numbers                                                                                                                       |           |           |           |           |           |           |           |
| 12 | Males 85+, 2020       | 627.405                                                                                                                                     |           |           |           |           |           |           |           |
| 13 | Females 85+, 2020     | 1214.414                                                                                                                                    |           |           |           |           |           |           |           |
| 14 | Section 2             | Calendar-Year-2020 Period Life Table Values                                                                                                 |           |           |           |           |           |           |           |
| 15 |                       | 2.1 From the source <a href="https://population.un.org/wpp/Download/Standard/CSV/">https://population.un.org/wpp/Download/Standard/CSV/</a> |           |           |           |           |           |           |           |
| 16 |                       | Get the file for Life Table, Medium variant                                                                                                 |           |           |           |           |           |           |           |
| 17 |                       | Keep the estimates for lx & ex, periods 2015-20 & 2020-25, all countries                                                                    |           |           |           |           |           |           |           |
| 19 | Example               | For Brazil, 8 vectors                                                                                                                       |           |           |           |           |           |           |           |
| 20 | lx, males, 2015-20    | 1.00E+05                                                                                                                                    | 98579.735 | 98335.619 | 98198.045 | 98026.349 | 97196.061 | 95892.45  | 94701.252 |
| 21 | lx, females, 2015-20  | 1.00E+05                                                                                                                                    | 98822.813 | 98621.471 | 98537.678 | 98404.742 | 98183.564 | 97899.232 | 97581.555 |
| 22 | lx, males, 2020-25    | 1.00E+05                                                                                                                                    | 98798.839 | 98588.303 | 98467.29  | 98313.245 | 97554.476 | 96344.713 | 95227.117 |
| 23 | lx, females, 2020-25  | 1.00E+05                                                                                                                                    | 98997.945 | 98823.323 | 98749.266 | 98629.531 | 98426.818 | 98162.535 | 97864.354 |
| 24 | ex, males, 2015-20    | 71.899                                                                                                                                      | 71.9336   | 68.1082   | 63.2001   | 58.3064   | 53.7796   | 49.4757   | 45.0666   |
| 25 | ex, females, 2015-20  | 79.272                                                                                                                                      | 79.2152   | 75.3739   | 70.4359   | 65.5276   | 60.6693   | 55.838    | 51.0113   |
| 26 | ex, males, 2020-25    | 73.012                                                                                                                                      | 72.8987   | 69.0509   | 64.1327   | 59.2293   | 54.6672   | 50.3212   | 45.8825   |
| 27 | ex, females, 2020-25  | 80.1448                                                                                                                                     | 79.9552   | 76.0938   | 71.149    | 66.2324   | 61.3633   | 56.5215   | 51.6858   |
| 28 | 2.1.a                 | Get npx from lx                                                                                                                             |           |           |           |           |           |           |           |
| 29 | Example               | For Brazil, 4 vectors (10 values for x=0, 1, 5, 15, 25, 35, 45, 55, 65 & 75)                                                                |           |           |           |           |           |           |           |
| 30 | npx, males, 2015-20   | 9.86E-01                                                                                                                                    | 9.98E-01  | 9.97E-01  | 9.78E-01  | 9.74E-01  | 9.64E-01  | 9.33E-01  | 8.68E-01  |
| 31 | npx, females, 2015-20 | 9.88E-01                                                                                                                                    | 9.98E-01  | 9.98E-01  | 9.95E-01  | 9.92E-01  | 9.84E-01  | 9.64E-01  | 9.22E-01  |
| 32 | npx, males, 2020-25   | 9.88E-01                                                                                                                                    | 9.98E-01  | 9.97E-01  | 9.80E-01  | 9.76E-01  | 9.66E-01  | 9.37E-01  | 8.76E-01  |
| 33 | npx, females, 2020-25 | 9.90E-01                                                                                                                                    | 9.98E-01  | 9.98E-01  | 9.95E-01  | 9.93E-01  | 9.85E-01  | 9.66E-01  | 9.27E-01  |
| 34 | 2.1.b                 | Get npx for 2020 from npx for 2015-20 & npx for 2020-25                                                                                     |           |           |           |           |           |           |           |
| 35 | Example               | For Brazil, 2 vectors                                                                                                                       |           |           |           |           |           |           |           |
| 36 | npx, males, 2020      | 9.87E-01                                                                                                                                    | 9.98E-01  | 9.97E-01  | 9.79E-01  | 9.75E-01  | 9.65E-01  | 9.35E-01  | 8.72E-01  |
| 37 | npx, females, 2020    | 9.89E-01                                                                                                                                    | 9.98E-01  | 9.98E-01  | 9.95E-01  | 9.92E-01  | 9.85E-01  | 9.65E-01  | 9.25E-01  |

## 2.2

## 2.2.a Get nmx from lx &amp; ex

Example For Brazil, 4 vectors (11 values for x=0, 1, 5, 15, 25, 35, 45, 55, 65, 75 & 85)

|                       |          |          |          |          |          |          |          |          |
|-----------------------|----------|----------|----------|----------|----------|----------|----------|----------|
| nmx, males, 2015-20   | 1.44E-02 | 6.20E-04 | 3.15E-04 | 2.20E-03 | 2.61E-03 | 3.71E-03 | 6.88E-03 | 1.41E-02 |
| nmx, females, 2015-20 | 1.19E-02 | 5.10E-04 | 2.20E-04 | 5.15E-04 | 7.90E-04 | 1.59E-03 | 3.65E-03 | 8.07E-03 |
| nmx, males, 2020-25   | 1.21E-02 | 5.33E-04 | 2.79E-04 | 2.02E-03 | 2.44E-03 | 3.48E-03 | 6.44E-03 | 1.31E-02 |
| nmx, females, 2020-25 | 1.01E-02 | 4.41E-04 | 1.96E-04 | 4.75E-04 | 7.42E-04 | 1.50E-03 | 3.43E-03 | 7.53E-03 |

## 2.2.b Get nmx for 2020 from nmx for 2015-20 &amp; nmx for 2020-25

Example For Brazil, 2 vectors

|                    |            |            |            |            |            |            |            |            |
|--------------------|------------|------------|------------|------------|------------|------------|------------|------------|
| nmx, males, 2020   | 0.01326754 | 0.00057671 | 0.00029717 | 0.00210824 | 0.00252603 | 0.00359544 | 0.00665761 | 0.01356478 |
| nmx, females, 2020 | 0.01100635 | 0.00047573 | 0.00020812 | 0.00049471 | 0.00076566 | 0.00154808 | 0.0035403  | 0.0078015  |

Updated Mortality Indicators (Part A in Technical Appendix)Section 1 *CCDR*1.1 From the source <https://coronavirus.jhu.edu/>

Get current estimate date & cumulative number of covid-19 deaths

Keep the estimates for all UN countries and territories

Example For Brazil, 1 number & 1 date (month/day/year)

|                  |          |
|------------------|----------|
| Death estimate   | 194949   |
| Date of estimate | 1 1 2021 |

For USA 1 number & 1 date (month/day/year)

|                  |          |
|------------------|----------|
| Death estimate   | 345737   |
| Date of estimate | 1 1 2021 |

## 1.2 From fixed demographic indicators

Get date of first CoViD-19 death and total mid-2020 population size for all locations in (1.1)

Example For Brazil, 1 number (in thousands) & 1 date (month/day/year)

|                        |            |
|------------------------|------------|
| Total population, 2020 | 212559.409 |
| Date of first death    | 3 17 2020  |

For USA, 1 number (in thousands) & 1 date (month/day/year)

|                        |            |
|------------------------|------------|
| Total population, 2020 | 331002.647 |
| Date of first death    | 3 2 2020   |

## 1.3 Calculate exposure in person-years for all locations in (1.1)

Example For Brazil, 1 number (in thousands)

1  
2  
3  
4  
5  
6  
7  
8  
9  
10  
11  
12  
13  
14  
15  
16  
17  
18  
19  
20  
21  
22  
23  
24  
25  
26  
27  
28  
29  
30  
31  
32  
33  
34  
35  
36  
37  
38  
39  
40  
41  
42  
43  
44  
45  
46  
47

Person-years 169002  
For USA, 1 number (in thousands)

Person-years 276740

1.4 Calculate the estimated period Crude Covid-19 Death Rate (CCDR) for all locations in (1.1)

Example For Brazil, 1 number (in deaths per thousand person-years)

CCDR 1.15352968

Section 2 CCMR

2.1 From the source <https://data.cdc.gov/NCHS/Provisional-COVID-19-Death-Counts-by-Sex-Age-and-S/9bhg-hcku>

Get report date and number of reported covid-19 deaths by sex and age group

Example 2 vectors & 1 date (month/day/year)

|                  |    |    |      |     |      |      |      |       |
|------------------|----|----|------|-----|------|------|------|-------|
| Male deaths      | 22 | 11 | 32   | 292 | 1332 | 3620 | 9748 | 23104 |
| Female deaths    | 10 | 8  | 19   | 191 | 755  | 1778 | 4746 | 12877 |
| Date of estimate | 12 | 30 | 2020 |     |      |      |      |       |

2.2 From fixed demographic indicators

Get the mid-2020 population size by age groups for all locations in (1.1)

Example For Brazil, 2 vectors (in thousands)

|                           |         |          |           |           |           |           |           |           |
|---------------------------|---------|----------|-----------|-----------|-----------|-----------|-----------|-----------|
| Males by age group, 2020  | 1468.3  | 5936.346 | 15088.226 | 16938.867 | 17105.688 | 16298.25  | 12892.572 | 9931.736  |
| Females by age group, 202 | 1402.62 | 5667.827 | 14456.033 | 16431.186 | 16994.813 | 16691.918 | 13731.053 | 11134.693 |

For USA, 2 vectors (in thousands)

|                           |          |          |           |           |           |           |           |           |
|---------------------------|----------|----------|-----------|-----------|-----------|-----------|-----------|-----------|
| Males by age group, 2020  | 2039.37  | 8015.693 | 21023.906 | 22157.053 | 23846.969 | 20977.453 | 20288.634 | 20751.951 |
| Females by age group, 202 | 1951.448 | 7669.821 | 20110.733 | 21344.6   | 23040.84  | 20932.937 | 20342.971 | 21459.462 |

2.3 Calculate age-and-sex-specific covid-19 death rates for the USA

Example For USA, 2 vectors (in deaths per thousand person-years)

|              |            |            |            |            |            |            |            |            |
|--------------|------------|------------|------------|------------|------------|------------|------------|------------|
| Male rates   | 0.01478763 | 0.00188115 | 0.00208645 | 0.0180652  | 0.07656724 | 0.23655262 | 0.65861963 | 1.52616046 |
| Female rates | 0.00702449 | 0.0014298  | 0.00129508 | 0.01226641 | 0.04491802 | 0.11643232 | 0.31980504 | 0.82256044 |

2.4 Calculate estimated counterfactual numbers of covid-19 deaths for all locations in (1.1)

Example For Brazil, 2 vectors

|                            |            |            |            |            |            |            |            |            |
|----------------------------|------------|------------|------------|------------|------------|------------|------------|------------|
| Female deaths by age group | 17.2633594 | 8.8788082  | 25.029871  | 243.298299 | 1041.34693 | 3065.35408 | 6751.28026 | 12051.3935 |
| Male deaths by age group   | 7.83369941 | 6.44325327 | 14.8853377 | 160.250029 | 606.944377 | 1545.22488 | 3491.41165 | 7282.12236 |

2.5 Calculate the Comparative Covid-19 Mortality Ratio (CCMR) for estimated numbers of covid-19 deaths for all locations i

Example For Brazil, 1 number (in deaths per thousand person-years)

CCMR 1.56700864

Section 3 Estimated Reduction in 2020-Life Expectancies

## 3.1 From fixed demographic indicators

Get period life-table age-specific death rates (nmx) and survival probabilities (npx) for year-2020 for each country in (1.1)

Example For Brazil, 4 vectors

|                                 |            |            |            |            |            |            |            |            |
|---------------------------------|------------|------------|------------|------------|------------|------------|------------|------------|
| npx, males, 2020                | 0.98689226 | 0.99769634 | 0.99703248 | 0.97910377 | 0.97504726 | 0.964638   | 0.93535103 | 0.87212003 |
| npx, females, 2020              | 0.9891034  | 0.99809934 | 0.9979207  | 0.99506403 | 0.99236928 | 0.98462455 | 0.96513929 | 0.92453186 |
| nm <sub>x</sub> , males, 2020   | 0.01326754 | 0.00057671 | 0.00029717 | 0.00210824 | 0.00252603 | 0.00359544 | 0.00665761 | 0.01356478 |
| nm <sub>x</sub> , females, 2020 | 0.01100635 | 0.00047573 | 0.00020812 | 0.00049471 | 0.00076566 | 0.00154808 | 0.0035403  | 0.0078015  |

## 3.2 Calculate the age-specific ratio of updated to previously projected deaths from all causes in 2020 for each country in (1.1)

Example For Brazil, 2 vectors

|                           |            |            |            |            |            |            |            |            |
|---------------------------|------------|------------|------------|------------|------------|------------|------------|------------|
| nR <sub>x</sub> , males   | 1.00138135 | 1.00406304 | 1.0087466  | 1.01066705 | 1.03772699 | 1.0818541  | 1.12292859 | 1.13942177 |
| nR <sub>x</sub> , females | 1.00079169 | 1.00374383 | 1.00775227 | 1.03088616 | 1.07306933 | 1.09364783 | 1.11238789 | 1.1309569  |

## 3.3 Calculate age-specific survival probabilities in the new projected year-2020 life table for each country in (1.1)

Example For Brazil, 2 vectors

|               |            |            |            |            |            |            |            |            |
|---------------|------------|------------|------------|------------|------------|------------|------------|------------|
| *npx, males   | 0.98687427 | 0.99768699 | 0.99700656 | 0.97888324 | 0.97411816 | 0.96179945 | 0.92769792 | 0.85564043 |
| *npx, females | 0.98909482 | 0.99809223 | 0.9979046  | 0.99491197 | 0.991814   | 0.98319684 | 0.96129813 | 0.91508011 |

3.4 Calculate the age-specific number of years lived after age  $x$  for individuals dying in the age interval in the new projected year

Example For Brazil, 2 vectors

|               |            |            |            |            |            |            |            |            |
|---------------|------------|------------|------------|------------|------------|------------|------------|------------|
| *nax, males   | 0.08110658 | 1.60991325 | 5.28729479 | 5.77473421 | 5.11743064 | 5.33412189 | 5.50442983 | 5.48014364 |
| *nax, females | 0.08485635 | 1.49391652 | 5.57429439 | 5.43728791 | 5.56616648 | 5.5718189  | 5.59769645 | 5.65219385 |

3.5 Calculate new values of life expectancies ( $e_x^o$  values) in the year-2020 life table for all locations in (1.1)

Example For Brazil, 2 vectors

|             |            |            |            |            |            |            |            |            |
|-------------|------------|------------|------------|------------|------------|------------|------------|------------|
| ex, males   | 70.8076455 | 70.7483298 | 66.9086182 | 57.0936317 | 48.2006984 | 39.3453996 | 30.6962525 | 22.65963   |
| ex, females | 78.1103825 | 77.9706461 | 74.1168248 | 64.2607503 | 54.5615767 | 44.9659637 | 35.6392228 | 26.8486949 |

## 3.6 Calculate the difference between the new values of life expectancies in year-2020 life table and the original values

Example For Brazil, 3 vectors

|                        |            |            |            |            |            |            |            |            |
|------------------------|------------|------------|------------|------------|------------|------------|------------|------------|
| Diff in ex, males      | 1.64122072 | 1.66171283 | 1.66490029 | 1.66824885 | 1.69203454 | 1.69313261 | 1.65089297 | 1.5415536  |
| Diff in ex, females    | 1.59375157 | 1.61062505 | 1.61314637 | 1.61539917 | 1.61437525 | 1.59913747 | 1.56596075 | 1.4978324  |
| Diff in ex, both sexes | 1.61806504 | 1.63679196 | 1.63965448 | 1.64246852 | 1.65415196 | 1.64728132 | 1.60946262 | 1.52022618 |

1  
2  
3  
4  
5  
6  
7  
8  
9  
10  
11  
12  
13  
14  
15  
16  
17  
18  
19  
20  
21  
22  
23  
24  
25  
26  
27  
28  
29  
30  
31  
32  
33  
34  
35  
36  
37  
38  
39  
40  
41  
42  
43  
44  
45  
46  
47

For peer review only

|          |          |          |          |          |          |          |          |         |         |
|----------|----------|----------|----------|----------|----------|----------|----------|---------|---------|
| 7704.528 | 6721.639 | 6170.933 | 5508.456 | 4423.28  | 3394.482 | 2351.464 | 1480.939 | 921.508 | 423.007 |
| 7956.785 | 7079.054 | 6651.999 | 6089.814 | 5044.879 | 4034.221 | 2957.955 | 2011.193 | 1395.7  | 752.233 |

1  
2  
3  
4  
5  
6  
7  
8  
9  
10  
11  
12  
13  
14  
15  
16  
17  
18  
19  
20  
21  
22  
23  
24  
25  
26  
27  
28  
29  
30  
31  
32  
33  
34  
35  
36  
37  
38  
39  
40  
41  
42  
43  
44  
45  
46  
47

|           |           |           |           |           |           |           |           |           |           |
|-----------|-----------|-----------|-----------|-----------|-----------|-----------|-----------|-----------|-----------|
| 93421.833 | 91887.99  | 90018.099 | 87486.788 | 84010.341 | 79319.932 | 72901.013 | 64131.683 | 53579.501 | 40657.012 |
| 97128.793 | 96489.731 | 95591.475 | 94181.698 | 92153.999 | 89297.819 | 84964.87  | 78829.755 | 70191.912 | 58246.853 |
| 94018.919 | 92566.322 | 90795.125 | 88400.322 | 85115.544 | 80684.01  | 74603.737 | 66238.802 | 56043.892 | 43307.648 |
| 97436.95  | 96832.354 | 95982.892 | 94652.211 | 92742.5   | 90056.543 | 85979.982 | 80186.326 | 71961.344 | 60423.493 |
| 40.6489   | 36.2843   | 31.9839   | 27.8333   | 23.8762   | 20.1327   | 16.6737   | 13.5976   | 10.7666   | 8.3748    |
| 46.2368   | 41.5255   | 36.8907   | 32.4029   | 28.0576   | 23.87     | 19.9517   | 16.2986   | 12.9793   | 10.1045   |
| 41.4392   | 37.0491   | 32.721    | 28.5362   | 24.536    | 20.7393   | 17.2149   | 14.0595   | 11.1458   | 8.6677    |
| 46.9009   | 42.1773   | 37.527    | 33.017    | 28.6424   | 24.4174   | 20.4489   | 16.7351   | 13.3455   | 10.3928   |
| 7.35E-01  | 4.99E-01  |           |           |           |           |           |           |           |           |
| 8.26E-01  | 6.17E-01  |           |           |           |           |           |           |           |           |
| 7.51E-01  | 5.21E-01  |           |           |           |           |           |           |           |           |
| 8.37E-01  | 6.35E-01  |           |           |           |           |           |           |           |           |
| 7.43E-01  | 5.10E-01  |           |           |           |           |           |           |           |           |
| 8.32E-01  | 6.26E-01  |           |           |           |           |           |           |           |           |

1  
2  
3  
4  
5  
6  
7  
8  
9  
10  
11  
12  
13  
14  
15  
16  
17  
18  
19  
20  
21  
22  
23  
24  
25  
26  
27  
28  
29  
30  
31  
32  
33  
34  
35  
36  
37  
38  
39  
40  
41  
42  
43  
44  
45  
46  
47

|            |            |            |
|------------|------------|------------|
| 3.03E-02   | 6.63E-02   | 0.15550407 |
| 1.88E-02   | 4.66E-02   | 0.12978754 |
| 2.81E-02   | 6.23E-02   | 0.1505752  |
| 1.76E-02   | 4.39E-02   | 0.12634398 |
| 0.02919471 | 0.06428998 | 0.15303963 |
| 0.01820512 | 0.04522272 | 0.12806576 |

For peer review only

1  
2  
3  
4  
5  
6  
7  
8  
9  
10  
11  
12  
13  
14  
15  
16  
17  
18  
19  
20  
21  
22  
23  
24  
25  
26  
27  
28  
29  
30  
31  
32  
33  
34  
35  
36  
37  
38  
39  
40  
41  
42  
43  
44  
45  
46  
47

For peer review only

|       |       |       |
|-------|-------|-------|
| 39437 | 46138 | 39811 |
| 24917 | 36506 | 56317 |

|          |          |          |
|----------|----------|----------|
| 5745.946 | 2402.447 | 627.405  |
| 6992.176 | 3406.893 | 1214.414 |

|           |          |          |
|-----------|----------|----------|
| 15110.793 | 7132.609 | 2441.585 |
| 17063.097 | 9056.327 | 4244.395 |

|            |            |            |
|------------|------------|------------|
| 3.57757354 | 8.86711422 | 22.3513209 |
| 2.00175005 | 5.52565937 | 18.1884493 |

|            |            |            |
|------------|------------|------------|
| 16344.1377 | 16937.4498 | 11149.6972 |
| 11128.4352 | 14967.6806 | 17562.0149 |

in (1.1)



1  
2  
3  
4  
5  
6  
7  
8  
9  
10  
11  
12  
13  
14  
15  
16  
17  
18  
19  
20  
21  
22  
23  
24  
25  
26  
27  
28  
29  
30  
31  
32  
33  
34  
35  
36  
37  
38  
39  
40  
41  
42  
43  
44  
45  
46  
47

|            |            |            |  |
|------------|------------|------------|--|
| 0.7430472  | 0.51010334 |            |  |
| 0.83152401 | 0.62587533 |            |  |
| 0.02919471 | 0.06428998 | 0.15303963 |  |
| 0.01820512 | 0.04522272 | 0.12806576 |  |

|            |            |           |  |
|------------|------------|-----------|--|
| 1.15090904 | 1.16746247 | 1.1709303 |  |
| 1.13600533 | 1.14950624 | 1.1679704 |  |

|            |            |  |  |
|------------|------------|--|--|
| 0.7104796  | 0.45572398 |  |  |
| 0.81091875 | 0.58352773 |  |  |

r-2020 life table for each country in (1.1)

|            |            |            |  |
|------------|------------|------------|--|
| 5.23508467 | 4.89517641 | 5.58039632 |  |
| 5.51992621 | 5.23312565 | 6.68551905 |  |

|            |            |            |  |
|------------|------------|------------|--|
| 15.558071  | 9.76468738 | 5.58039632 |  |
| 18.8157407 | 11.9159148 | 6.68551905 |  |

|            |            |            |  |
|------------|------------|------------|--|
| 1.38206161 | 1.18856733 | 0.95385881 |  |
| 1.38149726 | 1.24416135 | 1.12296928 |  |
| 1.38178632 | 1.21568636 | 1.03635172 |  |

For peer review only

For peer review only

|         |        |        |
|---------|--------|--------|
| 161.001 | 37.722 | 5.675  |
| 349.826 | 96.88  | 15.475 |

1  
2  
3  
4  
5  
6  
7  
8  
9  
10  
11  
12  
13  
14  
15  
16  
17  
18  
19  
20  
21  
22  
23  
24  
25  
26  
27  
28  
29  
30  
31  
32  
33  
34  
35  
36  
37  
38  
39  
40  
41  
42  
43  
44  
45  
46  
47

|           |           |           |          |
|-----------|-----------|-----------|----------|
| 26752.433 | 14359.584 | 5872.788  | 1613.615 |
| 43309.775 | 27310.5   | 13632.434 | 4476.96  |
| 29206.533 | 16167.993 | 6847.801  | 1951.199 |
| 45685.258 | 29447.489 | 15089.164 | 5098.862 |
| 6.4307    | 4.9084    | 3.6986    | 2.8377   |
| 7.7049    | 5.7626    | 4.1402    | 3.04     |
| 6.6412    | 5.047     | 3.7801    | 2.8715   |
| 7.9149    | 5.9015    | 4.223     | 3.0747   |

For peer review only

## Beyond Deaths per Capita: Comparative CoViD-19 Mortality Indicators

### Supplementary Information: Sensitivity Analysis

Patrick Heuveline, Ph.D. and Michael Tzen, M.S.

California Center for Population Research (CCPR)

University of California, Los Angeles (UCLA)

This file illustrates alternate calculations of life expectancy reduction using the actual age distribution for Brazil (from 12/31/2020) and 1/1

#### Age distribution of CoViD-19 deaths in Brazil

1.1 From the source <https://transparencia.registrocivil.org.br/especial-covid>

For Brazil, 3 vectors

|                |     |     |     |      |      |       |       |       |
|----------------|-----|-----|-----|------|------|-------|-------|-------|
| Male deaths    | 158 | 641 | 971 | 3316 | 7474 | 14634 | 25672 | 28900 |
| Female deaths  | 154 | 536 | 849 | 2245 | 4453 | 8813  | 16502 | 20343 |
| Unknown deaths | 1   | 39  | 1   | 0    | 5    | 3     | 4     | 10    |

1.2 From the source <https://coronavirus.jhu.edu/>

Get current estimate date & cumulative number of covid-19 deaths

Example For Brazil, 1 number & 1 date (month/day/year)

|                  |          |
|------------------|----------|
| Death estimate   | 194949   |
| Date of estimate | 1 1 2021 |

1.3 Prorate to the current estimate for males and females

For Brazil, 2 vectors

|               |     |     |     |      |      |       |       |       |
|---------------|-----|-----|-----|------|------|-------|-------|-------|
| Male deaths   | 163 | 680 | 997 | 3403 | 7672 | 15018 | 26345 | 29660 |
| Female deaths | 159 | 568 | 872 | 2304 | 4571 | 9044  | 16934 | 20878 |

#### Directly standardized rate

2.1 From the source <https://www.who.int/emergencies/diseases/novel-coronavirus-2019/situation-reports/>

Determine date of first CoViD-19 death for UN countries and territories

Example For Brazil, 1 date (month/day/year)

|                     |           |
|---------------------|-----------|
| Date of first death | 3 17 2020 |
|---------------------|-----------|

2.2 From the source <https://population.un.org/wpp/Download/Standard/CSV/>

Get the file for Population by Age and Sex, Medium variant, annual from 1950 to 2010

Keep the estimates for 2020, all countries

Example For Brazil, 2 vectors

|             |          |         |          |         |          |          |          |          |
|-------------|----------|---------|----------|---------|----------|----------|----------|----------|
| Males, 2020 | 7404.646 | 7464.84 | 7623.386 | 8253.31 | 8685.557 | 8534.004 | 8571.684 | 8593.722 |
|-------------|----------|---------|----------|---------|----------|----------|----------|----------|

|    |                                                                                                                                             |            |            |            |            |            |            |            |            |
|----|---------------------------------------------------------------------------------------------------------------------------------------------|------------|------------|------------|------------|------------|------------|------------|------------|
| 1  |                                                                                                                                             |            |            |            |            |            |            |            |            |
| 2  | Females, 2020                                                                                                                               | 7070.447   | 7136.977   | 7319.056   | 7964.694   | 8466.492   | 8418.59    | 8576.223   | 8735.133   |
| 3  | Example For USA, 2 vectors                                                                                                                  |            |            |            |            |            |            |            |            |
| 4  | Males, 2020                                                                                                                                 | 10055.063  | 10246.393  | 10777.513  | 10834.321  | 11322.732  | 12144.455  | 11702.514  | 10858.871  |
| 5  | Females, 2020                                                                                                                               | 9621.269   | 9798.759   | 10311.974  | 10408.587  | 10936.013  | 11690.875  | 11349.965  | 10756.92   |
| 6  |                                                                                                                                             |            |            |            |            |            |            |            |            |
| 7  | 2.3 Get population by age and sex with same age-groups as Covid-19 deaths from Brazil                                                       |            |            |            |            |            |            |            |            |
| 8  | Example For Brazil, 2 vectors                                                                                                               |            |            |            |            |            |            |            |            |
| 9  | Males, 2020                                                                                                                                 | 14869.486  | 15876.696  | 17219.561  | 17165.406  | 14426.167  | 11679.389  | 7817.762   | 3832.403   |
| 10 | Females, 2020                                                                                                                               | 14207.424  | 15283.75   | 16885.082  | 17311.356  | 15035.839  | 12741.813  | 9079.1     | 4969.148   |
| 11 |                                                                                                                                             |            |            |            |            |            |            |            |            |
| 12 | For USA, 2 vectors                                                                                                                          |            |            |            |            |            |            |            |            |
| 13 | Males, 2020                                                                                                                                 | 20301.456  | 21611.834  | 23467.187  | 22561.385  | 20087.681  | 21021.6    | 18515.16   | 10972.505  |
| 14 | Females, 2020                                                                                                                               | 19420.028  | 20720.561  | 22626.888  | 22106.885  | 20260.716  | 21098.477  | 19973.01   | 13110.092  |
| 15 |                                                                                                                                             |            |            |            |            |            |            |            |            |
| 16 | 2.4 Get sex- and age-specific rates of death from Covid-19 in Brazil                                                                        |            |            |            |            |            |            |            |            |
| 17 | Example For Brazil, 2 vectors                                                                                                               |            |            |            |            |            |            |            |            |
| 18 | Males, 2020                                                                                                                                 | 0.01093808 | 0.04280015 | 0.05789299 | 0.19822148 | 0.53183196 | 1.28584541 | 3.36983562 | 7.73936137 |
| 19 | Females, 2020                                                                                                                               | 0.01115798 | 0.03717768 | 0.05162182 | 0.13306858 | 0.30401662 | 0.70980389 | 1.86519929 | 4.20156921 |
| 20 |                                                                                                                                             |            |            |            |            |            |            |            |            |
| 21 | 2.5 Multiply sex- and age-specific rates of death from Covid-19 in Brazil by proportion in sex- and age-group in USA                        |            |            |            |            |            |            |            |            |
| 22 | Example                                                                                                                                     |            |            |            |            |            |            |            |            |
| 23 | Males, 2020                                                                                                                                 | 0.00067087 | 0.00279451 | 0.00410446 | 0.01351092 | 0.03227548 | 0.08166257 | 0.18849712 | 0.25655439 |
| 24 | Females, 2020                                                                                                                               | 0.00065464 | 0.0023273  | 0.0035288  | 0.00888734 | 0.0186089  | 0.04524369 | 0.11254787 | 0.16641244 |
| 25 |                                                                                                                                             |            |            |            |            |            |            |            |            |
| 26 | 2.6 Sum across all sex- and age-groups and multiply by one over fraction of year                                                            |            |            |            |            |            |            |            |            |
| 27 | Example For Brazil, 1 number                                                                                                                |            |            |            |            |            |            |            |            |
| 28 | <i>DSCDR</i>                                                                                                                                | 1.89262081 |            |            |            |            |            |            |            |
| 29 | <u>Reduction in life expectancy at birth</u>                                                                                                |            |            |            |            |            |            |            |            |
| 30 |                                                                                                                                             |            |            |            |            |            |            |            |            |
| 31 | 3.1 From the source <a href="https://population.un.org/wpp/Download/Standard/CSV/">https://population.un.org/wpp/Download/Standard/CSV/</a> |            |            |            |            |            |            |            |            |
| 32 | Get the file for Life Table, Medium variant                                                                                                 |            |            |            |            |            |            |            |            |
| 33 | Keep the estimates for lx & ex, periods 2015-20 & 2020-25, all countries                                                                    |            |            |            |            |            |            |            |            |
| 34 | Example For Brazil, 8 vectors                                                                                                               |            |            |            |            |            |            |            |            |
| 35 | lx, males, 2015-20                                                                                                                          | 1.00E+05   | 98579.735  | 98335.619  | 98198.045  | 98026.349  | 97196.061  | 95892.45   | 94701.252  |
| 36 | lx, females, 2015-20                                                                                                                        | 1.00E+05   | 98822.813  | 98621.471  | 98537.678  | 98404.742  | 98183.564  | 97899.232  | 97581.555  |
| 37 | lx, males, 2020-25                                                                                                                          | 1.00E+05   | 98798.839  | 98588.303  | 98467.29   | 98313.245  | 97554.476  | 96344.713  | 95227.117  |
| 38 | lx, females, 2020-25                                                                                                                        | 1.00E+05   | 98997.945  | 98823.323  | 98749.266  | 98629.531  | 98426.818  | 98162.535  | 97864.354  |
| 39 | ex, males, 2015-20                                                                                                                          | 71.899     | 71.9336    | 68.1082    | 63.2001    | 58.3064    | 53.7796    | 49.4757    | 45.0666    |
| 40 | ex, females, 2015-20                                                                                                                        | 79.272     | 79.2152    | 75.3739    | 70.4359    | 65.5276    | 60.6693    | 55.838     | 51.0113    |
| 41 |                                                                                                                                             |            |            |            |            |            |            |            |            |
| 42 |                                                                                                                                             |            |            |            |            |            |            |            |            |
| 43 |                                                                                                                                             |            |            |            |            |            |            |            |            |
| 44 |                                                                                                                                             |            |            |            |            |            |            |            |            |
| 45 |                                                                                                                                             |            |            |            |            |            |            |            |            |
| 46 |                                                                                                                                             |            |            |            |            |            |            |            |            |
| 47 |                                                                                                                                             |            |            |            |            |            |            |            |            |

|   |                      |         |         |         |         |         |         |         |         |
|---|----------------------|---------|---------|---------|---------|---------|---------|---------|---------|
| 1 |                      |         |         |         |         |         |         |         |         |
| 2 | ex, males, 2020-25   | 73.012  | 72.8987 | 69.0509 | 64.1327 | 59.2293 | 54.6672 | 50.3212 | 45.8825 |
| 3 | ex, females, 2020-25 | 80.1448 | 79.9552 | 76.0938 | 71.149  | 66.2324 | 61.3633 | 56.5215 | 51.6858 |

### 3.2 Get npx from lx

Example For Brazil, 4 vectors (10 values for x=0, 10, 20, 30, 40, 50, 60, 70, 80 & 90)

|    |                       |          |          |          |          |          |          |          |          |
|----|-----------------------|----------|----------|----------|----------|----------|----------|----------|----------|
| 7  | npx, males, 2015-20   | 9.82E-01 | 9.90E-01 | 9.74E-01 | 9.70E-01 | 9.52E-01 | 9.07E-01 | 8.09E-01 | 6.34E-01 |
| 8  | npx, females, 2015-20 | 9.85E-01 | 9.96E-01 | 9.94E-01 | 9.89E-01 | 9.76E-01 | 9.48E-01 | 8.83E-01 | 7.39E-01 |
| 9  | npx, males, 2020-25   | 9.85E-01 | 9.91E-01 | 9.76E-01 | 9.72E-01 | 9.55E-01 | 9.13E-01 | 8.21E-01 | 6.54E-01 |
| 10 | npx, females, 2020-25 | 9.87E-01 | 9.97E-01 | 9.94E-01 | 9.89E-01 | 9.77E-01 | 9.51E-01 | 8.90E-01 | 7.54E-01 |

### 3.3 Get npx for 2020 from npx for 2015-20 & npx for 2020-25

Example For Brazil, 2 vectors

|    |                    |          |          |          |          |          |          |          |          |
|----|--------------------|----------|----------|----------|----------|----------|----------|----------|----------|
| 14 | npx, males, 2020   | 9.83E-01 | 9.90E-01 | 9.75E-01 | 9.71E-01 | 9.54E-01 | 9.10E-01 | 8.15E-01 | 6.44E-01 |
| 15 | npx, females, 2020 | 9.86E-01 | 9.97E-01 | 9.94E-01 | 9.89E-01 | 9.77E-01 | 9.50E-01 | 8.87E-01 | 7.46E-01 |

### 3.4 Get nmx from lx & ex

Example For Brazil, 4 vectors (10 values for x=0, 10, 20, 30, 40, 50, 60, 70, 80 & 90)

|    |                       |          |          |          |          |          |          |          |          |
|----|-----------------------|----------|----------|----------|----------|----------|----------|----------|----------|
| 19 | nmx, males, 2015-20   | 1.83E-03 | 1.02E-03 | 2.60E-03 | 3.01E-03 | 4.90E-03 | 9.74E-03 | 2.10E-02 | 4.42E-02 |
| 20 | nmx, females, 2015-20 | 1.48E-03 | 3.60E-04 | 6.15E-04 | 1.12E-03 | 2.42E-03 | 5.31E-03 | 1.24E-02 | 2.96E-02 |
| 21 | nmx, males, 2020-25   | 1.55E-03 | 9.30E-04 | 2.41E-03 | 2.83E-03 | 4.59E-03 | 9.09E-03 | 1.95E-02 | 4.13E-02 |
| 22 | nmx, females, 2020-25 | 1.27E-03 | 3.27E-04 | 5.73E-04 | 1.06E-03 | 2.27E-03 | 4.96E-03 | 1.15E-02 | 2.77E-02 |

### 3.5 Get nmx for 2020 from nmx for 2015-20 & nmx for 2020-25

Example For Brazil, 2 vectors

|    |                    |            |            |            |            |            |            |            |            |
|----|--------------------|------------|------------|------------|------------|------------|------------|------------|------------|
| 27 | nmx, males, 2020   | 0.0016929  | 0.00097656 | 0.00250775 | 0.00292208 | 0.00474457 | 0.00941498 | 0.02020965 | 0.04270665 |
| 28 | nmx, females, 2020 | 0.00137368 | 0.00034345 | 0.00059398 | 0.00109197 | 0.00234504 | 0.00513461 | 0.01193996 | 0.02862141 |

### 3.6 Calculate the age-specific ratio of updated to previously projected deaths from all causes in 2020

Example For Brazil, 2 vectors

|    |              |            |            |            |            |            |            |            |            |
|----|--------------|------------|------------|------------|------------|------------|------------|------------|------------|
| 32 | nRx, males   | 1.00645683 | 1.04381057 | 1.02306272 | 1.06775732 | 1.11188206 | 1.13606504 | 1.16540882 | 1.17815534 |
| 33 | nRx, females | 1.00811825 | 1.10823141 | 1.08688843 | 1.12180884 | 1.12952171 | 1.13795791 | 1.15547598 | 1.14513354 |

### 3.3 Calculate age-specific survival probabilities in the new projected year-2020 life table

Example For Brazil, 2 vectors

|    |               |            |            |            |            |            |            |            |            |
|----|---------------|------------|------------|------------|------------|------------|------------|------------|------------|
| 37 | *npx, males   | 0.983219   | 0.98983851 | 0.97467337 | 0.96925272 | 0.94848628 | 0.89803377 | 0.78756703 | 0.59523245 |
| 38 | *npx, females | 0.98632478 | 0.9962     | 0.99356399 | 0.98781731 | 0.97381497 | 0.94306847 | 0.87013866 | 0.71513706 |

### 3.4 Calculate the age-specific number of years lived after age x for individuals dying in the age interval in the new projected year

Example For Brazil, 2 vectors

|    |             |          |          |          |          |          |          |          |          |
|----|-------------|----------|----------|----------|----------|----------|----------|----------|----------|
| 42 | *nax, males | 9.76E-01 | 7.00E+00 | 4.93E+00 | 5.29E+00 | 5.48E+00 | 5.47E+00 | 5.44E+00 | 5.17E+00 |
|----|-------------|----------|----------|----------|----------|----------|----------|----------|----------|

1  
 2 \*nax, females 8.24E-01 5.73E+00 5.24E+00 5.57E+00 5.72E+00 5.56E+00 5.55E+00 5.45E+00

3 3.5 Calculate new values of life expectancies ( $e_x^o$  values) in the year-2020 life table

4 Example For Brazil, 2 vectors

5 ex, males 70.6699538 61.859447 52.4226137 43.6566529 34.8737072 26.4700037 18.8541296 12.4735945  
 6 ex, females 78.1512328 69.2233562 59.4655567 49.8168095 40.3625479 31.2941625 22.8475841 15.4298419

7 3.6 Calculate the difference between the new values of life expectancies in year-2020 life table and the original values

8 Example For Brazil, 2 vectors

9 Diff in ex, males 1.77862005 1.80107639 1.79502682 1.81239945 1.78768793 1.70972343 1.57740644 1.35151234  
 10 Diff in ex, females 1.5526901 1.56534358 1.54703342 1.52808035 1.48525429 1.41231696 1.29293553 1.08442601  
 11 Diff in ex, both sexes 1.66841032 1.68608477 1.67405443 1.67370721 1.64015933 1.5646471 1.43864014 1.22122633

12 3.7 Difference with difference using CDC sex- and age-specific rates of death from Covid-19

13 Example For Brazil, 3 numbers

14 Diff in diff in ex, males 0.13739933  
 15 Diff in diff in ex, females -0.0410615  
 16 Diff in diff in ex, both sexes 0.05034528

17 3.8 Relative difference with difference using CDC sex- and age-specific rates of death from Covid-19

18 Example For Brazil, 3 numbers

19 % diff in diff in ex, males 7.73%  
 20 % diff in diff in ex, female -2.64%  
 21 % diff in diff in ex, both sexes 3.02%

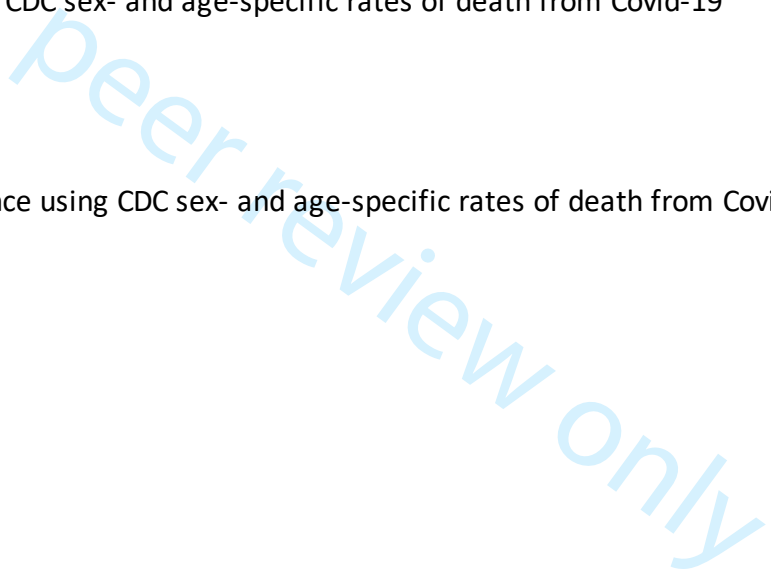

1  
2  
3  
4  
5  
6  
7  
8  
9  
10  
11  
12  
13  
14  
15  
16  
17  
18  
19  
20  
21  
22  
23  
24  
25  
26  
27  
28  
29  
30  
31  
32  
33  
34  
35  
36  
37  
38  
39  
40  
41  
42  
43  
44  
45  
46  
47

/2021 data updates

For peer review only

|       |      |     |
|-------|------|-----|
| 21000 | 5673 | 256 |
| 19145 | 7687 | 495 |
| 7     | 3    | 0   |

|       |      |     |
|-------|------|-----|
| 21552 | 5822 | 263 |
| 19648 | 7889 | 508 |

|          |          |          |          |         |          |          |          |         |         |
|----------|----------|----------|----------|---------|----------|----------|----------|---------|---------|
| 7704.528 | 6721.639 | 6170.933 | 5508.456 | 4423.28 | 3394.482 | 2351.464 | 1480.939 | 921.508 | 423.007 |
|----------|----------|----------|----------|---------|----------|----------|----------|---------|---------|



|    |            |            |            |           |           |           |           |           |           |           |
|----|------------|------------|------------|-----------|-----------|-----------|-----------|-----------|-----------|-----------|
| 1  |            |            |            |           |           |           |           |           |           |           |
| 2  | 7956.785   | 7079.054   | 6651.999   | 6089.814  | 5044.879  | 4034.221  | 2957.955  | 2011.193  | 1395.7    | 752.233   |
| 3  |            |            |            |           |           |           |           |           |           |           |
| 4  | 10118.582  | 9969.099   | 10319.535  | 10702.065 | 10049.886 | 8465.274  | 6645.519  | 4326.986  | 2805.623  | 1538.659  |
| 5  | 10176.017  | 10084.699  | 10258.272  | 10840.205 | 10619.257 | 9353.753  | 7709.344  | 5400.748  | 3655.579  | 2372.445  |
| 6  |            |            |            |           |           |           |           |           |           |           |
| 7  |            |            |            |           |           |           |           |           |           |           |
| 8  |            |            |            |           |           |           |           |           |           |           |
| 9  | 1344.515   | 198.723    | 5.675      |           |           |           |           |           |           |           |
| 10 | 2147.933   | 446.706    | 15.475     |           |           |           |           |           |           |           |
| 11 |            |            |            |           |           |           |           |           |           |           |
| 12 |            |            |            |           |           |           |           |           |           |           |
| 13 | 4344.282   | 882.134    | 20.792     |           |           |           |           |           |           |           |
| 14 | 6028.024   | 1795.638   | 76.312     |           |           |           |           |           |           |           |
| 15 |            |            |            |           |           |           |           |           |           |           |
| 16 |            |            |            |           |           |           |           |           |           |           |
| 17 |            |            |            |           |           |           |           |           |           |           |
| 18 | 16.0294873 | 29.2989751 | 46.2875686 |           |           |           |           |           |           |           |
| 19 | 9.14746233 | 17.6613084 | 32.8219826 |           |           |           |           |           |           |           |
| 20 |            |            |            |           |           |           |           |           |           |           |
| 21 |            |            |            |           |           |           |           |           |           |           |
| 22 |            |            |            |           |           |           |           |           |           |           |
| 23 | 0.21038083 | 0.07808283 | 0.00290756 |           |           |           |           |           |           |           |
| 24 | 0.16658816 | 0.09580986 | 0.00756704 |           |           |           |           |           |           |           |
| 25 |            |            |            |           |           |           |           |           |           |           |
| 26 |            |            |            |           |           |           |           |           |           |           |
| 27 |            |            |            |           |           |           |           |           |           |           |
| 28 |            |            |            |           |           |           |           |           |           |           |
| 29 |            |            |            |           |           |           |           |           |           |           |
| 30 |            |            |            |           |           |           |           |           |           |           |
| 31 |            |            |            |           |           |           |           |           |           |           |
| 32 |            |            |            |           |           |           |           |           |           |           |
| 33 |            |            |            |           |           |           |           |           |           |           |
| 34 |            |            |            |           |           |           |           |           |           |           |
| 35 | 93421.833  | 91887.99   | 90018.099  | 87486.788 | 84010.341 | 79319.932 | 72901.013 | 64131.683 | 53579.501 | 40657.012 |
| 36 | 97128.793  | 96489.731  | 95591.475  | 94181.698 | 92153.999 | 89297.819 | 84964.87  | 78829.755 | 70191.912 | 58246.853 |
| 37 | 94018.919  | 92566.322  | 90795.125  | 88400.322 | 85115.544 | 80684.01  | 74603.737 | 66238.802 | 56043.892 | 43307.648 |
| 38 | 97436.95   | 96832.354  | 95982.892  | 94652.211 | 92742.5   | 90056.543 | 85979.982 | 80186.326 | 71961.344 | 60423.493 |
| 39 | 40.6489    | 36.2843    | 31.9839    | 27.8333   | 23.8762   | 20.1327   | 16.6737   | 13.5976   | 10.7666   | 8.3748    |
| 40 | 46.2368    | 41.5255    | 36.8907    | 32.4029   | 28.0576   | 23.87     | 19.9517   | 16.2986   | 12.9793   | 10.1045   |
| 41 |            |            |            |           |           |           |           |           |           |           |
| 42 |            |            |            |           |           |           |           |           |           |           |
| 43 |            |            |            |           |           |           |           |           |           |           |
| 44 |            |            |            |           |           |           |           |           |           |           |
| 45 |            |            |            |           |           |           |           |           |           |           |
| 46 |            |            |            |           |           |           |           |           |           |           |
| 47 |            |            |            |           |           |           |           |           |           |           |

For peer review only

|    |                                             |            |            |         |         |         |         |         |         |         |
|----|---------------------------------------------|------------|------------|---------|---------|---------|---------|---------|---------|---------|
| 1  |                                             |            |            |         |         |         |         |         |         |         |
| 2  | 41.4392                                     | 37.0491    | 32.721     | 28.5362 | 24.536  | 20.7393 | 17.2149 | 14.0595 | 11.1458 | 8.6677  |
| 3  | 46.9009                                     | 42.1773    | 37.527     | 33.017  | 28.6424 | 24.4174 | 20.4489 | 16.7351 | 13.3455 | 10.3928 |
| 4  |                                             |            |            |         |         |         |         |         |         |         |
| 5  |                                             |            |            |         |         |         |         |         |         |         |
| 6  |                                             |            |            |         |         |         |         |         |         |         |
| 7  | 3.53E-01                                    | 1.12E-01   |            |         |         |         |         |         |         |         |
| 8  | 4.69E-01                                    | 1.64E-01   |            |         |         |         |         |         |         |         |
| 9  | 3.73E-01                                    | 1.21E-01   |            |         |         |         |         |         |         |         |
| 10 | 4.87E-01                                    | 1.73E-01   |            |         |         |         |         |         |         |         |
| 11 |                                             |            |            |         |         |         |         |         |         |         |
| 12 |                                             |            |            |         |         |         |         |         |         |         |
| 13 |                                             |            |            |         |         |         |         |         |         |         |
| 14 | 3.63E-01                                    | 1.16E-01   |            |         |         |         |         |         |         |         |
| 15 | 4.78E-01                                    | 1.68E-01   |            |         |         |         |         |         |         |         |
| 16 |                                             |            |            |         |         |         |         |         |         |         |
| 17 |                                             |            |            |         |         |         |         |         |         |         |
| 18 |                                             |            |            |         |         |         |         |         |         |         |
| 19 | 9.74E-02                                    | 1.93E-01   | 0.35239807 |         |         |         |         |         |         |         |
| 20 | 7.17E-02                                    | 1.59E-01   | 0.32894737 |         |         |         |         |         |         |         |
| 21 | 9.24E-02                                    | 1.87E-01   | 0.34825004 |         |         |         |         |         |         |         |
| 22 | 6.82E-02                                    | 1.54E-01   | 0.32523498 |         |         |         |         |         |         |         |
| 23 |                                             |            |            |         |         |         |         |         |         |         |
| 24 |                                             |            |            |         |         |         |         |         |         |         |
| 25 |                                             |            |            |         |         |         |         |         |         |         |
| 26 |                                             |            |            |         |         |         |         |         |         |         |
| 27 | 0.0948876                                   | 0.19023682 | 0.35032406 |         |         |         |         |         |         |         |
| 28 | 0.06997506                                  | 0.15641075 | 0.32709118 |         |         |         |         |         |         |         |
| 29 |                                             |            |            |         |         |         |         |         |         |         |
| 30 |                                             |            |            |         |         |         |         |         |         |         |
| 31 |                                             |            |            |         |         |         |         |         |         |         |
| 32 | 1.16258084                                  | 1.14240565 | 1.11378989 |         |         |         |         |         |         |         |
| 33 | 1.12710062                                  | 1.10591924 | 1.08734181 |         |         |         |         |         |         |         |
| 34 |                                             |            |            |         |         |         |         |         |         |         |
| 35 |                                             |            |            |         |         |         |         |         |         |         |
| 36 |                                             |            |            |         |         |         |         |         |         |         |
| 37 | 0.30797917                                  | 0.08573665 |            |         |         |         |         |         |         |         |
| 38 | 0.43521884                                  | 0.13951307 |            |         |         |         |         |         |         |         |
| 39 | r-2020 life table for each country in (1.1) |            |            |         |         |         |         |         |         |         |
| 40 |                                             |            |            |         |         |         |         |         |         |         |
| 41 |                                             |            |            |         |         |         |         |         |         |         |
| 42 | 4.48E+00                                    | 3.31E+00   | 2.56287112 |         |         |         |         |         |         |         |
| 43 |                                             |            |            |         |         |         |         |         |         |         |
| 44 |                                             |            |            |         |         |         |         |         |         |         |
| 45 |                                             |            |            |         |         |         |         |         |         |         |
| 46 |                                             |            |            |         |         |         |         |         |         |         |
| 47 |                                             |            |            |         |         |         |         |         |         |         |

|    |            |            |            |
|----|------------|------------|------------|
| 1  |            |            |            |
| 2  | 4.93E+00   | 3.98E+00   | 2.81167477 |
| 3  |            |            |            |
| 4  |            |            |            |
| 5  |            |            |            |
| 6  | 7.44056406 | 4.10152939 | 2.56287112 |
| 7  | 9.40510835 | 5.21245068 | 2.81167477 |
| 8  |            |            |            |
| 9  |            |            |            |
| 10 |            |            |            |
| 11 | 1.07858502 | 0.87534353 | 0.29162883 |
| 12 | 0.84187688 | 0.61890552 | 0.24557677 |
| 13 | 0.96311764 | 0.75025182 | 0.26916441 |
| 14 |            |            |            |
| 15 |            |            |            |
| 16 |            |            |            |
| 17 |            |            |            |
| 18 |            |            |            |
| 19 |            |            |            |
| 20 |            |            |            |
| 21 |            |            |            |
| 22 |            |            |            |
| 23 |            |            |            |
| 24 |            |            |            |
| 25 |            |            |            |
| 26 |            |            |            |
| 27 |            |            |            |
| 28 |            |            |            |
| 29 |            |            |            |
| 30 |            |            |            |
| 31 |            |            |            |
| 32 |            |            |            |
| 33 |            |            |            |
| 34 |            |            |            |
| 35 |            |            |            |
| 36 |            |            |            |
| 37 |            |            |            |
| 38 |            |            |            |
| 39 |            |            |            |
| 40 |            |            |            |
| 41 |            |            |            |
| 42 |            |            |            |
| 43 |            |            |            |
| 44 |            |            |            |
| 45 |            |            |            |
| 46 |            |            |            |
| 47 |            |            |            |

For peer review only

1  
2  
3  
4  
5  
6  
7  
8  
9  
10  
11  
12  
13  
14  
15  
16  
17  
18  
19  
20  
21  
22  
23  
24  
25  
26  
27  
28  
29  
30  
31  
32  
33  
34  
35  
36  
37  
38  
39  
40  
41  
42  
43  
44  
45  
46  
47

For peer review only

161.001      37.722      5.675

|    |           |           |           |          |
|----|-----------|-----------|-----------|----------|
| 1  |           |           |           |          |
| 2  | 349.826   | 96.88     | 15.475    |          |
| 3  |           |           |           |          |
| 4  | 703.131   | 179.003   | 20.792    |          |
| 5  | 1348.005  | 447.633   | 76.312    |          |
| 6  |           |           |           |          |
| 7  |           |           |           |          |
| 8  |           |           |           |          |
| 9  |           |           |           |          |
| 10 |           |           |           |          |
| 11 |           |           |           |          |
| 12 |           |           |           |          |
| 13 |           |           |           |          |
| 14 |           |           |           |          |
| 15 |           |           |           |          |
| 16 |           |           |           |          |
| 17 |           |           |           |          |
| 18 |           |           |           |          |
| 19 |           |           |           |          |
| 20 |           |           |           |          |
| 21 |           |           |           |          |
| 22 |           |           |           |          |
| 23 |           |           |           |          |
| 24 |           |           |           |          |
| 25 |           |           |           |          |
| 26 |           |           |           |          |
| 27 |           |           |           |          |
| 28 |           |           |           |          |
| 29 |           |           |           |          |
| 30 |           |           |           |          |
| 31 |           |           |           |          |
| 32 |           |           |           |          |
| 33 |           |           |           |          |
| 34 |           |           |           |          |
| 35 | 26752.433 | 14359.584 | 5872.788  | 1613.615 |
| 36 | 43309.775 | 27310.5   | 13632.434 | 4476.96  |
| 37 | 29206.533 | 16167.993 | 6847.801  | 1951.199 |
| 38 | 45685.258 | 29447.489 | 15089.164 | 5098.862 |
| 39 |           |           |           |          |
| 40 | 6.4307    | 4.9084    | 3.6986    | 2.8377   |
| 41 | 7.7049    | 5.7626    | 4.1402    | 3.04     |
| 42 |           |           |           |          |
| 43 |           |           |           |          |
| 44 |           |           |           |          |
| 45 |           |           |           |          |
| 46 |           |           |           |          |
| 47 |           |           |           |          |

For peer review only

|    |        |        |        |        |
|----|--------|--------|--------|--------|
| 1  |        |        |        |        |
| 2  | 6.6412 | 5.047  | 3.7801 | 2.8715 |
| 3  | 7.9149 | 5.9015 | 4.223  | 3.0747 |
| 4  |        |        |        |        |
| 5  |        |        |        |        |
| 6  |        |        |        |        |
| 7  |        |        |        |        |
| 8  |        |        |        |        |
| 9  |        |        |        |        |
| 10 |        |        |        |        |
| 11 |        |        |        |        |
| 12 |        |        |        |        |
| 13 |        |        |        |        |
| 14 |        |        |        |        |
| 15 |        |        |        |        |
| 16 |        |        |        |        |
| 17 |        |        |        |        |
| 18 |        |        |        |        |
| 19 |        |        |        |        |
| 20 |        |        |        |        |
| 21 |        |        |        |        |
| 22 |        |        |        |        |
| 23 |        |        |        |        |
| 24 |        |        |        |        |
| 25 |        |        |        |        |
| 26 |        |        |        |        |
| 27 |        |        |        |        |
| 28 |        |        |        |        |
| 29 |        |        |        |        |
| 30 |        |        |        |        |
| 31 |        |        |        |        |
| 32 |        |        |        |        |
| 33 |        |        |        |        |
| 34 |        |        |        |        |
| 35 |        |        |        |        |
| 36 |        |        |        |        |
| 37 |        |        |        |        |
| 38 |        |        |        |        |
| 39 |        |        |        |        |
| 40 |        |        |        |        |
| 41 |        |        |        |        |
| 42 |        |        |        |        |
| 43 |        |        |        |        |
| 44 |        |        |        |        |
| 45 |        |        |        |        |
| 46 |        |        |        |        |
| 47 |        |        |        |        |

For peer review only

| Location                                       | loc_type_fin | Pop_Mid2020   | Density_Mid | CDR_Yr_Last | Days_Est | CCDR_Est |
|------------------------------------------------|--------------|---------------|-------------|-------------|----------|----------|
| Afghanistan                                    | Cntry/Terr   | 38,928.341    | 59.6        | 6.52        | 286      | 0.07     |
| Albania                                        | Cntry/Terr   | 2,877.800     | 105.0       | 7.82        | 295      | 0.51     |
| Algeria                                        | Cntry/Terr   | 43,851.043    | 18.4        | 4.72        | 297      | 0.08     |
| Andorra                                        | Cntry/Terr   | 77.265        | 164.4       | NA          | 285      | 1.40     |
| Angola                                         | Cntry/Terr   | 32,866.268    | 26.4        | 8.33        | 277      | 0.02     |
| Antigua and Barbuda                            | Cntry/Terr   | 97.928        | 222.6       | 6.34        | 269      | 0.07     |
| Argentina                                      | Cntry/Terr   | 45,195.777    | 16.5        | 7.61        | 301      | 1.16     |
| Armenia                                        | Cntry/Terr   | 2,963.234     | 104.1       | 9.91        | 282      | 1.24     |
| Aruba                                          | Cntry/Terr   | 106.766       | 593.1       | 8.97        | 262      | 0.64     |
| Australia                                      | Cntry/Terr   | 25,499.881    | 3.3         | 6.60        | 307      | 0.04     |
| Austria                                        | Cntry/Terr   | 9,006.400     | 109.3       | 9.87        | 296      | 0.85     |
| Azerbaijan                                     | Cntry/Terr   | 10,139.175    | 122.7       | 6.75        | 290      | 0.33     |
| Bahamas                                        | Cntry/Terr   | 393.248       | 39.3        | 6.71        | 275      | 0.58     |
| Bahrain                                        | Cntry/Terr   | 1,701.583     | 2,238.9     | 2.38        | 293      | 0.26     |
| Bangladesh                                     | Cntry/Terr   | 164,689.383   | 1,265.2     | 5.55        | 289      | 0.06     |
| Barbados                                       | Cntry/Terr   | 287.371       | 668.3       | 8.98        | 271      | 0.03     |
| Belarus                                        | Cntry/Terr   | 9,449.321     | 46.6        | 12.55       | 276      | 0.20     |
| Belgium                                        | Cntry/Terr   | 11,589.616    | 382.7       | 9.79        | 293      | 2.10     |
| Belize                                         | Cntry/Terr   | 397.621       | 17.4        | 4.70        | 271      | 0.84     |
| Benin                                          | Cntry/Terr   | 12,123.198    | 107.5       | 8.96        | 271      | 0.00     |
| Bermuda                                        | Cntry/Terr   | 62.273        | 1,245.5     | NA          | 270      | 0.22     |
| Bolivia (Plurinational State of)               | Cntry/Terr   | 11,673.029    | 10.8        | 6.79        | 278      | 1.03     |
| Bosnia and Herzegovina                         | Cntry/Terr   | 3,280.815     | 64.3        | 10.61       | 287      | 1.57     |
| Botswana                                       | Cntry/Terr   | 2,351.625     | 4.1         | 5.80        | 276      | 0.02     |
| Brazil                                         | Cntry/Terr   | 212,559.409   | 25.4        | 6.42        | 291      | 1.15     |
| British Virgin Islands                         | Cntry/Terr   | 30.237        | 201.6       | NA          | 258      | 0.05     |
| Brunei Darussalam                              | Cntry/Terr   | 437.483       | 83.0        | 4.40        | 281      | 0.01     |
| Bulgaria                                       | Cntry/Terr   | 6,948.445     | 64.0        | 15.38       | 298      | 1.34     |
| Burkina Faso                                   | Cntry/Terr   | 20,903.278    | 76.4        | 8.27        | 290      | 0.01     |
| Burundi                                        | Cntry/Terr   | 11,890.781    | 463.0       | 8.04        | 258      | 0.00     |
| Cabo Verde                                     | Cntry/Terr   | 555.988       | 138.0       | 5.64        | 281      | 0.26     |
| Cameroon                                       | Cntry/Terr   | 26,545.864    | 56.2        | 9.36        | 284      | 0.02     |
| Canada                                         | Cntry/Terr   | 37,742.157    | 4.2         | 7.71        | 298      | 0.51     |
| Cayman Islands                                 | Cntry/Terr   | 65.720        | 273.8       | NA          | 293      | 0.04     |
| Central African Republic                       | Cntry/Terr   | 4,829.764     | 7.8         | 12.39       | 224      | 0.02     |
| Chad                                           | Cntry/Terr   | 16,425.859    | 13.0        | 12.24       | 249      | 0.01     |
| Channel Islands                                | Cntry/Terr   | 173.859       | 915.0       | 7.81        | 282      | 0.43     |
| Chile                                          | Cntry/Terr   | 19,116.209    | 25.7        | 6.12        | 287      | 1.11     |
| China                                          | Cntry/Terr   | 1,439,323.774 | 153.3       | 7.12        | 357      | 0.00     |
| China, Hong Kong Special Administrative Region | Cntry/Terr   | 7,496.988     | 7,140.0     | 6.61        | 326      | 0.02     |
| China, Taiwan                                  | Cntry/Terr   | 23,816.775    | 672.6       | 7.50        | 321      | 0.00     |
| Colombia                                       | Cntry/Terr   | 50,882.884    | 45.9        | 5.53        | 286      | 1.09     |

|    |               |            |               |       |       |     |      |
|----|---------------|------------|---------------|-------|-------|-----|------|
| 1  |               |            |               |       |       |     |      |
| 2  |               |            |               |       |       |     |      |
| 3  | Comoros       | Cntry/Terr | 869.595       | 467.3 | 7.27  | 244 | 0.02 |
| 4  | Congo         | Cntry/Terr | 5,518.092     | 16.2  | 6.75  | 276 | 0.03 |
| 5  | Costa Rica    | Cntry/Terr | 5,094.114     | 99.8  | 5.05  | 289 | 0.54 |
| 6  | Cote d'Ivoire | Cntry/Terr | 26,378.275    | 83.0  | 10.16 | 275 | 0.01 |
| 7  | Croatia       | Cntry/Terr | 4,105.268     | 73.4  | 13.13 | 284 | 1.23 |
| 8  | Cuba          | Cntry/Terr | 11,326.616    | 106.4 | 8.91  | 290 | 0.02 |
| 9  | Curacao       | Cntry/Terr | 164.100       | 369.6 | 8.77  | 287 | 0.11 |
| 10 | Cyprus        | Cntry/Terr | 1,207.361     | 130.7 | 6.99  | 290 | 0.12 |
| 11 | Czechia       | Cntry/Terr | 10,708.982    | 138.6 | 10.50 | 286 | 1.38 |
| 12 | Democratic R  | Cntry/Terr | 89,561.404    | 39.5  | 9.58  | 287 | 0.01 |
| 13 | Denmark       | Cntry/Terr | 5,792.203     | 136.5 | 9.72  | 293 | 0.28 |
| 14 | Djibouti      | Cntry/Terr | 988.002       | 42.6  | 7.08  | 268 | 0.08 |
| 15 | Dominican R   | Cntry/Terr | 10,847.904    | 224.5 | 6.13  | 292 | 0.28 |
| 16 | Ecuador       | Cntry/Terr | 17,643.060    | 71.0  | 5.10  | 293 | 0.99 |
| 17 | Egypt         | Cntry/Terr | 102,334.403   | 102.8 | 5.83  | 300 | 0.09 |
| 18 | El Salvador   | Cntry/Terr | 6,486.201     | 313.0 | 7.02  | 276 | 0.27 |
| 19 | Equatorial G  | Cntry/Terr | 1,402.985     | 50.0  | 9.43  | 256 | 0.09 |
| 20 | Estonia       | Cntry/Terr | 1,326.539     | 31.3  | 11.62 | 283 | 0.22 |
| 21 | Eswatini      | Cntry/Terr | 1,160.164     | 67.5  | 9.42  | 261 | 0.25 |
| 22 | Ethiopia      | Cntry/Terr | 114,963.583   | 115.0 | 6.66  | 272 | 0.02 |
| 23 | Finland       | Cntry/Terr | 5,540.718     | 18.2  | 9.73  | 287 | 0.13 |
| 24 | France        | Cntry/Terr | 65,273.512    | 119.2 | 9.27  | 322 | 1.13 |
| 25 | French Guian  | Cntry/Terr | 298.682       | 3.6   | 2.92  | 257 | 0.34 |
| 26 | Gabon         | Cntry/Terr | 2,225.728     | 8.6   | 6.91  | 288 | 0.04 |
| 27 | Gambia        | Cntry/Terr | 2,416.664     | 238.8 | 7.99  | 281 | 0.07 |
| 28 | Georgia       | Cntry/Terr | 3,989.175     | 57.4  | 12.85 | 273 | 0.84 |
| 29 | Germany       | Cntry/Terr | 83,783.945    | 240.4 | 11.16 | 299 | 0.49 |
| 30 | Ghana         | Cntry/Terr | 31,072.945    | 136.6 | 7.35  | 285 | 0.01 |
| 31 | Greece        | Cntry/Terr | 10,423.056    | 80.9  | 10.81 | 297 | 0.57 |
| 32 | Guadeloupe    | Cntry/Terr | 400.127       | 245.8 | 8.19  | 281 | 0.50 |
| 33 | Guam          | Cntry/Terr | 168.783       | 312.6 | 5.18  | 286 | 0.92 |
| 34 | Guatemala     | Cntry/Terr | 17,915.567    | 167.2 | 4.75  | 294 | 0.33 |
| 35 | Guinea        | Cntry/Terr | 13,132.792    | 53.4  | 8.54  | 262 | 0.01 |
| 36 | Guinea-Bissau | Cntry/Terr | 1,967.998     | 70.0  | 9.72  | 251 | 0.03 |
| 37 | Guyana        | Cntry/Terr | 786.559       | 4.0   | 7.42  | 296 | 0.26 |
| 38 | Haiti         | Cntry/Terr | 11,402.533    | 413.7 | 8.57  | 271 | 0.03 |
| 39 | Honduras      | Cntry/Terr | 9,904.608     | 88.5  | 4.44  | 282 | 0.41 |
| 40 | Hungary       | Cntry/Terr | 9,660.350     | 106.7 | 12.53 | 293 | 1.23 |
| 41 | Iceland       | Cntry/Terr | 341.250       | 3.4   | 6.70  | 288 | 0.11 |
| 42 | India         | Cntry/Terr | 1,380,004.385 | 464.1 | 7.24  | 296 | 0.13 |
| 43 | Indonesia     | Cntry/Terr | 273,523.621   | 151.0 | 6.45  | 298 | 0.10 |
| 44 | Iran (Islamic | Cntry/Terr | 83,992.953    | 51.6  | 4.88  | 318 | 0.76 |
| 45 | Iraq          | Cntry/Terr | 40,222.503    | 92.6  | 4.80  | 304 | 0.38 |
| 46 |               |            |               |       |       |     |      |
| 47 |               |            |               |       |       |     |      |
| 48 |               |            |               |       |       |     |      |
| 49 |               |            |               |       |       |     |      |
| 50 |               |            |               |       |       |     |      |
| 51 |               |            |               |       |       |     |      |
| 52 |               |            |               |       |       |     |      |
| 53 |               |            |               |       |       |     |      |
| 54 |               |            |               |       |       |     |      |
| 55 |               |            |               |       |       |     |      |
| 56 |               |            |               |       |       |     |      |
| 57 |               |            |               |       |       |     |      |
| 58 |               |            |               |       |       |     |      |
| 59 |               |            |               |       |       |     |      |
| 60 |               |            |               |       |       |     |      |



|    |               |            |             |          |       |     |      |
|----|---------------|------------|-------------|----------|-------|-----|------|
| 1  |               |            |             |          |       |     |      |
| 2  |               |            |             |          |       |     |      |
| 3  | Ireland       | Cntry/Terr | 4,937.796   | 71.7     | 6.05  | 297 | 0.56 |
| 4  | Isle of Man   | Cntry/Terr | 85.032      | 149.2    | NA    | 275 | 0.39 |
| 5  | Israel        | Cntry/Terr | 8,655.541   | 400.0    | 5.33  | 288 | 0.49 |
| 6  | Italy         | Cntry/Terr | 60,461.828  | 205.6    | 10.47 | 315 | 1.43 |
| 7  | Jamaica       | Cntry/Terr | 2,961.161   | 273.4    | 7.56  | 289 | 0.13 |
| 8  | Japan         | Cntry/Terr | 126,476.458 | 346.9    | 10.43 | 324 | 0.03 |
| 9  | Jordan        | Cntry/Terr | 10,203.140  | 114.9    | 3.86  | 281 | 0.49 |
| 10 | Kazakhstan    | Cntry/Terr | 18,776.707  | 7.0      | 7.13  | 281 | 0.19 |
| 11 | Kenya         | Cntry/Terr | 53,771.300  | 94.5     | 5.52  | 282 | 0.04 |
| 12 | Kuwait        | Cntry/Terr | 4,270.563   | 239.7    | 2.67  | 274 | 0.29 |
| 13 | Kyrgyzstan    | Cntry/Terr | 6,524.191   | 34.0     | 6.07  | 275 | 0.28 |
| 14 | Latvia        | Cntry/Terr | 1,886.202   | 30.3     | 14.60 | 274 | 0.45 |
| 15 | Lebanon       | Cntry/Terr | 6,825.442   | 667.2    | 4.31  | 298 | 0.26 |
| 16 | Liberia       | Cntry/Terr | 5,057.677   | 52.5     | 7.60  | 273 | 0.02 |
| 17 | Libya         | Cntry/Terr | 6,871.287   | 3.9      | 5.07  | 275 | 0.29 |
| 18 | Liechtensteir | Cntry/Terr | 38.137      | 238.4    | NA    | 273 | 1.37 |
| 19 | Lithuania     | Cntry/Terr | 2,722.291   | 43.4     | 13.56 | 288 | 0.68 |
| 20 | Luxembourg    | Cntry/Terr | 625.976     | 241.7    | 7.14  | 295 | 0.98 |
| 21 | Madagascar    | Cntry/Terr | 27,691.019  | 47.6     | 6.13  | 230 | 0.01 |
| 22 | Malawi        | Cntry/Terr | 19,129.955  | 202.9    | 6.77  | 270 | 0.01 |
| 23 | Malaysia      | Cntry/Terr | 32,365.998  | 98.5     | 5.05  | 290 | 0.02 |
| 24 | Maldives      | Cntry/Terr | 540.542     | 1,801.8  | 2.84  | 246 | 0.13 |
| 25 | Mali          | Cntry/Terr | 20,250.834  | 16.6     | 9.82  | 275 | 0.02 |
| 26 | Malta         | Cntry/Terr | 441.539     | 1,379.8  | 8.24  | 269 | 0.67 |
| 27 | Martinique    | Cntry/Terr | 375.265     | 354.0    | 9.07  | 283 | 0.14 |
| 28 | Mauritania    | Cntry/Terr | 4,649.660   | 4.5      | 7.27  | 274 | 0.10 |
| 29 | Mauritius     | Cntry/Terr | 1,271.767   | 626.5    | 8.30  | 284 | 0.01 |
| 30 | Mayotte       | Cntry/Terr | 272.813     | 727.5    | 2.69  | 276 | 0.27 |
| 31 | Mexico (Couri | Cntry/Terr | 128,932.753 | 66.3     | 5.97  | 289 | 1.24 |
| 32 | Monaco        | Cntry/Terr | 39.244      | 26,338.3 | NA    | 261 | 0.11 |
| 33 | Montenegro    | Cntry/Terr | 628.062     | 46.7     | 10.70 | 283 | 1.40 |
| 34 | Montserrat    | Cntry/Terr | 4.999       | 50.0     | NA    | 252 | 0.29 |
| 35 | Morocco       | Cntry/Terr | 36,910.558  | 82.7     | 5.06  | 298 | 0.25 |
| 36 | Mozambique    | Cntry/Terr | 31,255.435  | 39.7     | 8.62  | 222 | 0.01 |
| 37 | Myanmar       | Cntry/Terr | 54,409.794  | 83.3     | 8.19  | 277 | 0.07 |
| 38 | Nepal         | Cntry/Terr | 29,136.808  | 203.3    | 6.39  | 231 | 0.10 |
| 39 | Netherlands   | Cntry/Terr | 17,134.873  | 508.2    | 8.72  | 302 | 0.82 |
| 40 | New Zealand   | Cntry/Terr | 4,822.233   | 18.3     | 6.98  | 280 | 0.01 |
| 41 | Nicaragua     | Cntry/Terr | 6,624.554   | 55.0     | 5.06  | 281 | 0.03 |
| 42 | Niger         | Cntry/Terr | 24,206.636  | 19.1     | 8.41  | 282 | 0.01 |
| 43 | Nigeria       | Cntry/Terr | 206,139.587 | 226.3    | 11.97 | 283 | 0.01 |
| 44 | North Macec   | Cntry/Terr | 2,083.380   | 82.6     | 10.02 | 286 | 1.54 |
| 45 | Northern Ma   | Cntry/Terr | 57.557      | 125.1    | NA    | 275 | 0.05 |
| 46 |               |            |             |          |       |     |      |
| 47 |               |            |             |          |       |     |      |
| 48 |               |            |             |          |       |     |      |
| 49 |               |            |             |          |       |     |      |
| 50 |               |            |             |          |       |     |      |
| 51 |               |            |             |          |       |     |      |
| 52 |               |            |             |          |       |     |      |
| 53 |               |            |             |          |       |     |      |
| 54 |               |            |             |          |       |     |      |
| 55 |               |            |             |          |       |     |      |
| 56 |               |            |             |          |       |     |      |
| 57 |               |            |             |          |       |     |      |
| 58 |               |            |             |          |       |     |      |
| 59 |               |            |             |          |       |     |      |
| 60 |               |            |             |          |       |     |      |

|    |               |            |             |         |       |     |      |
|----|---------------|------------|-------------|---------|-------|-----|------|
| 1  |               |            |             |         |       |     |      |
| 2  |               |            |             |         |       |     |      |
| 3  | Norway        | Cntry/Terr | 5,421.242   | 14.8    | 8.00  | 295 | 0.10 |
| 4  | Oman          | Cntry/Terr | 5,106.622   | 16.5    | 2.44  | 277 | 0.39 |
| 5  | Pakistan      | Cntry/Terr | 220,892.331 | 286.5   | 6.98  | 289 | 0.06 |
| 6  | Panama        | Cntry/Terr | 4,314.768   | 58.0    | 5.06  | 298 | 1.14 |
| 7  | Paraguay      | Cntry/Terr | 7,132.530   | 18.0    | 5.48  | 287 | 0.40 |
| 8  | Peru          | Cntry/Terr | 32,971.846  | 25.8    | 5.45  | 288 | 1.45 |
| 9  | Philippines   | Cntry/Terr | 109,581.085 | 367.5   | 5.83  | 336 | 0.09 |
| 10 | Poland        | Cntry/Terr | 37,846.605  | 123.6   | 10.09 | 296 | 0.93 |
| 11 | Portugal      | Cntry/Terr | 10,196.707  | 111.3   | 10.59 | 291 | 0.85 |
| 12 | Puerto Rico   | Cntry/Terr | 2,860.840   | 322.5   | 9.35  | 287 | 0.67 |
| 13 | Qatar         | Cntry/Terr | 2,881.060   | 248.2   | 1.19  | 280 | 0.11 |
| 14 | Republic of K | Cntry/Terr | 51,269.183  | 527.3   | 5.92  | 318 | 0.02 |
| 15 | Republic of M | Cntry/Terr | 4,033.963   | 122.8   | 11.62 | 288 | 0.94 |
| 16 | Reunion       | Cntry/Terr | 895.308     | 358.1   | 6.21  | 227 | 0.08 |
| 17 | Romania       | Cntry/Terr | 19,237.682  | 83.6    | 13.03 | 286 | 1.05 |
| 18 | Russian Fedε  | Cntry/Terr | 145,934.460 | 8.9     | 12.72 | 283 | 0.50 |
| 19 | Rwanda        | Cntry/Terr | 12,952.209  | 525.0   | 5.32  | 217 | 0.01 |
| 20 | Saint Martin  | Cntry/Terr | 38.659      | 729.4   | NA    | 278 | 0.41 |
| 21 | San Marino    | Cntry/Terr | 33.938      | 565.6   | NA    | 301 | 2.11 |
| 22 | Sao Tome ar   | Cntry/Terr | 219.161     | 228.3   | 4.87  | 247 | 0.11 |
| 23 | Saudi Arabia  | Cntry/Terr | 34,813.867  | 16.2    | 3.47  | 284 | 0.23 |
| 24 | Senegal       | Cntry/Terr | 16,743.930  | 87.0    | 5.81  | 276 | 0.03 |
| 25 | Serbia        | Cntry/Terr | 8,737.370   | 99.9    | 13.17 | 288 | 0.66 |
| 26 | Sierra Leone  | Cntry/Terr | 7,976.985   | 110.5   | 11.91 | 256 | 0.01 |
| 27 | Siint Maarte  | Cntry/Terr | 42.882      | 1,261.2 | NA    | 275 | 0.84 |
| 28 | Singapore     | Cntry/Terr | 5,850.343   | 8,357.6 | 4.45  | 287 | 0.01 |
| 29 | Slovakia      | Cntry/Terr | 5,459.643   | 113.5   | 9.87  | 271 | 0.53 |
| 30 | Slovenia      | Cntry/Terr | 2,078.932   | 103.2   | 9.94  | 291 | 1.63 |
| 31 | Somalia       | Cntry/Terr | 15,893.219  | 25.3    | 10.94 | 269 | 0.01 |
| 32 | South Africa  | Cntry/Terr | 59,308.690  | 48.9    | 9.52  | 281 | 0.63 |
| 33 | South Sudan   | Cntry/Terr | 11,193.729  | 18.3    | 10.56 | 233 | 0.01 |
| 34 | Spain         | Cntry/Terr | 46,754.783  | 93.7    | 9.02  | 304 | 1.31 |
| 35 | Sri Lanka     | Cntry/Terr | 21,413.250  | 341.5   | 6.62  | 279 | 0.01 |
| 36 | State of Pale | Cntry/Terr | 5,101.416   | 847.4   | 3.46  | 283 | 0.35 |
| 37 | Sudan         | Cntry/Terr | 43,849.269  | 24.8    | 7.24  | 293 | 0.04 |
| 38 | Suriname      | Cntry/Terr | 586.634     | 3.8     | 7.32  | 271 | 0.28 |
| 39 | Sweden        | Cntry/Terr | 10,099.270  | 24.6    | 9.19  | 293 | 1.08 |
| 40 | Switzerland   | Cntry/Terr | 8,654.618   | 219.0   | 8.01  | 303 | 1.07 |
| 41 | Syrian Arab F | Cntry/Terr | 17,500.657  | 95.3    | 5.52  | 279 | 0.05 |
| 42 | Tajikistan    | Cntry/Terr | 9,537.642   | 68.1    | 4.90  | 245 | 0.01 |
| 43 | Thailand      | Cntry/Terr | 69,799.978  | 136.6   | 7.61  | 307 | 0.00 |
| 44 | Togo          | Cntry/Terr | 8,278.737   | 152.2   | 8.56  | 279 | 0.01 |
| 45 | Trinidad and  | Cntry/Terr | 1,399.491   | 272.8   | 8.32  | 283 | 0.12 |
| 46 |               |            |             |         |       |     |      |
| 47 |               |            |             |         |       |     |      |
| 48 |               |            |             |         |       |     |      |
| 49 |               |            |             |         |       |     |      |
| 50 |               |            |             |         |       |     |      |
| 51 |               |            |             |         |       |     |      |
| 52 |               |            |             |         |       |     |      |
| 53 |               |            |             |         |       |     |      |
| 54 |               |            |             |         |       |     |      |
| 55 |               |            |             |         |       |     |      |
| 56 |               |            |             |         |       |     |      |
| 57 |               |            |             |         |       |     |      |
| 58 |               |            |             |         |       |     |      |
| 59 |               |            |             |         |       |     |      |
| 60 |               |            |             |         |       |     |      |

|    |               |            |             |       |       |     |      |
|----|---------------|------------|-------------|-------|-------|-----|------|
| 1  |               |            |             |       |       |     |      |
| 2  |               |            |             |       |       |     |      |
| 3  | Tunisia       | Cntry/Terr | 11,818.618  | 76.1  | 6.26  | 288 | 0.50 |
| 4  | Turkey        | Cntry/Terr | 84,339.067  | 109.6 | 5.40  | 290 | 0.31 |
| 5  | Turks and Ca  | Cntry/Terr | 38.718      | 40.8  | NA    | 272 | 0.21 |
| 6  | Ukraine       | Cntry/Terr | 43,733.759  | 75.5  | 15.19 | 295 | 0.55 |
| 7  | United Arab   | Cntry/Terr | 9,890.400   | 118.3 | 1.45  | 287 | 0.09 |
| 8  | United Kingd  | Cntry/Terr | 67,886.004  | 280.6 | 9.38  | 302 | 1.31 |
| 9  | United Repul  | Cntry/Terr | 59,734.213  | 67.4  | 6.50  | 277 | 0.00 |
| 10 | United State  | Cntry/Terr | 331,002.647 | 36.2  | 8.69  | 306 | 1.25 |
| 11 | United State  | Cntry/Terr | 104.423     | 298.4 | 8.47  | 271 | 0.30 |
| 12 | Uruguay       | Cntry/Terr | 3,473.727   | 19.8  | 9.47  | 277 | 0.07 |
| 13 | Uzbekistan    | Cntry/Terr | 33,469.199  | 78.7  | 5.77  | 281 | 0.02 |
| 14 | Venezuela (E  | Cntry/Terr | 28,435.943  | 32.2  | 6.95  | 280 | 0.05 |
| 15 | Yemen         | Cntry/Terr | 29,825.968  | 56.5  | 6.01  | 247 | 0.03 |
| 16 | Zambia        | Cntry/Terr | 18,383.956  | 24.7  | 6.58  | 275 | 0.03 |
| 17 | Zimbabwe      | Cntry/Terr | 14,862.927  | 38.4  | 8.07  | 285 | 0.03 |
| 18 | Acre          | Brazil     | 892.059     | 5.4   | NA    | 270 | 1.21 |
| 19 | Alagoas       | Brazil     | 3,375.667   | 121.2 | NA    | 277 | 0.97 |
| 20 | Amapa         | Brazil     | 855.439     | 6.0   | NA    | 273 | 1.45 |
| 21 | Amazonas (E   | Brazil     | 4,192.173   | 2.7   | NA    | 283 | 1.63 |
| 22 | Bahia         | Brazil     | 15,043.792  | 26.6  | NA    | 279 | 0.80 |
| 23 | Ceara         | Brazil     | 9,236.905   | 62.0  | NA    | 282 | 1.40 |
| 24 | Distrito Fede | Brazil     | 3,049.880   | 529.4 | NA    | 279 | 1.83 |
| 25 | Espirito Sant | Brazil     | 4,064.780   | 88.2  | NA    | 275 | 1.66 |
| 26 | Goias         | Brazil     | 7,098.918   | 20.9  | NA    | 282 | 1.24 |
| 27 | Maranhao      | Brazil     | 7,156.397   | 21.7  | NA    | 278 | 0.83 |
| 28 | Mato Grosso   | Brazil     | 3,524.464   | 3.9   | NA    | 274 | 1.69 |
| 29 | Mato Grosso   | Brazil     | 2,810.886   | 7.9   | NA    | 277 | 1.09 |
| 30 | Minas Gerais  | Brazil     | 21,411.788  | 36.5  | NA    | 278 | 0.73 |
| 31 | Para          | Brazil     | 8,701.617   | 7.0   | NA    | 276 | 1.10 |
| 32 | Paraiba       | Brazil     | 4,064.251   | 72.0  | NA    | 276 | 1.20 |
| 33 | Parana        | Brazil     | 11,565.208  | 58.0  | NA    | 281 | 0.90 |
| 34 | Pernambuco    | Brazil     | 9,666.777   | 98.6  | NA    | 283 | 1.29 |
| 35 | Piaui         | Brazil     | 3,310.800   | 13.2  | NA    | 269 | 1.17 |
| 36 | Rio de Janeir | Brazil     | 17,463.128  | 399.2 | NA    | 289 | 1.85 |
| 37 | Rio Grande c  | Brazil     | 3,547.108   | 67.2  | NA    | 279 | 1.11 |
| 38 | Rio Grande c  | Brazil     | 11,507.839  | 40.9  | NA    | 283 | 1.00 |
| 39 | Rondonia      | Brazil     | 1,797.626   | 7.6   | NA    | 268 | 1.38 |
| 40 | Roraima       | Brazil     | 612.715     | 2.7   | NA    | 273 | 1.71 |
| 41 | Santa Catarin | Brazil     | 7,247.033   | 75.7  | NA    | 282 | 0.94 |
| 42 | Sao Paulo     | Brazil     | 46,446.155  | 187.1 | NA    | 291 | 1.27 |
| 43 | Sergipe       | Brazil     | 2,325.083   | 106.0 | NA    | 275 | 1.42 |
| 44 | Tocantins     | Brazil     | 1,590.921   | 5.7   | NA    | 262 | 1.08 |
| 45 | Anhui         | China      | 65,274.199  | 467.2 | 5.96  | 326 | 0.00 |
| 46 |               |            |             |       |       |     |      |
| 47 |               |            |             |       |       |     |      |
| 48 |               |            |             |       |       |     |      |
| 49 |               |            |             |       |       |     |      |
| 50 |               |            |             |       |       |     |      |
| 51 |               |            |             |       |       |     |      |
| 52 |               |            |             |       |       |     |      |
| 53 |               |            |             |       |       |     |      |
| 54 |               |            |             |       |       |     |      |
| 55 |               |            |             |       |       |     |      |
| 56 |               |            |             |       |       |     |      |
| 57 |               |            |             |       |       |     |      |
| 58 |               |            |             |       |       |     |      |
| 59 |               |            |             |       |       |     |      |
| 60 |               |            |             |       |       |     |      |

1  
2  
3  
4  
5  
6  
7  
8  
9  
10  
11  
12  
13  
14  
15  
16  
17  
18  
19  
20  
21  
22  
23  
24  
25  
26  
27  
28  
29  
30  
31  
32  
33  
34  
35  
36  
37  
38  
39  
40  
41  
42  
43  
44  
45  
46  
47  
48  
49  
50  
51  
52  
53  
54  
55  
56  
57  
58  
59  
60

|               |       |             |         |       |     |      |
|---------------|-------|-------------|---------|-------|-----|------|
| Beijing       | China | 22,086.180  | 1,314.7 | 5.58  | 326 | 0.00 |
| Chongqing     | China | 32,032.139  | 389.2   | 7.54  | 326 | 0.00 |
| Fujian        | China | 40,737.416  | 335.1   | 6.20  | 318 | 0.00 |
| Gansu         | China | 27,141.188  | 59.7    | 6.65  | 326 | 0.00 |
| Guangdong     | China | 118,131.330 | 656.3   | 4.55  | 326 | 0.00 |
| Guangxi       | China | 50,857.686  | 215.5   | 5.96  | 326 | 0.00 |
| Guizhou       | China | 37,148.668  | 211.1   | 6.85  | 326 | 0.00 |
| Hainan        | China | 9,689.620   | 285.0   | 6.01  | 326 | 0.00 |
| Hebei         | China | 77,845.071  | 414.7   | 6.38  | 344 | 0.00 |
| Heilongjiang  | China | 38,461.125  | 84.7    | 6.67  | 344 | 0.00 |
| Henan         | China | 98,844.373  | 591.9   | 6.80  | 326 | 0.00 |
| Hubei         | China | 60,772.884  | 326.9   | 7.00  | 357 | 0.08 |
| Hunan         | China | 70,934.167  | 337.8   | 7.08  | 326 | 0.00 |
| Inner Mongo   | China | 26,044.057  | 22.0    | 5.95  | 305 | 0.00 |
| Jiangxi       | China | 47,843.137  | 286.5   | 6.06  | 326 | 0.00 |
| Jilin         | China | 27,592.345  | 147.2   | 6.26  | 326 | 0.00 |
| Liaoning      | China | 44,623.518  | 305.9   | 7.39  | 324 | 0.00 |
| Shaanxi       | China | 39,619.778  | 192.7   | 6.24  | 318 | 0.00 |
| Shandong      | China | 103,253.406 | 671.3   | 7.18  | 326 | 0.00 |
| Shanghai      | China | 24,895.657  | 3,926.1 | 5.40  | 326 | 0.00 |
| Sichuan       | China | 85,873.613  | 177.1   | 7.01  | 326 | 0.00 |
| Tianjin       | China | 16,016.070  | 1,416.7 | 5.42  | 326 | 0.00 |
| Xinjiang      | China | 25,869.746  | 15.6    | 4.56  | 324 | 0.00 |
| Yunnan        | China | 49,811.822  | 126.4   | 6.32  | 318 | 0.00 |
| Zhejiang      | China | 59,983.359  | 588.1   | 5.58  | 317 | 0.00 |
| Abruzzo       | Italy | 1,314.662   | 121.5   | 11.20 | 298 | 1.13 |
| Basilicata    | Italy | 564.286     | 56.1    | 11.10 | 285 | 0.58 |
| Bolzano (Pro  | Italy | 531.191     | 71.8    | 8.30  | 296 | 1.72 |
| Calabria      | Italy | 1,949.987   | 128.1   | 10.10 | 293 | 0.30 |
| Campania      | Italy | 5,801.773   | 424.5   | 9.20  | 297 | 0.60 |
| Emilia-Roma   | Italy | 4,468.697   | 164.5   | 11.20 | 311 | 2.04 |
| Friuli-Venezi | Italy | 1,218.962   | 155.1   | 11.90 | 300 | 1.64 |
| Lazio         | Italy | 5,885.980   | 341.7   | 9.70  | 302 | 0.78 |
| Liguria       | Italy | 1,557.702   | 192.2   | 14.30 | 305 | 2.23 |
| Lombardia     | Italy | 10,073.686  | 422.2   | 9.90  | 315 | 2.90 |
| Marche        | Italy | 1,529.183   | 162.7   | 11.20 | 306 | 1.23 |
| Molise        | Italy | 306.556     | 68.8    | 12.10 | 292 | 0.78 |
| Piemonte      | Italy | 4,369.052   | 172.3   | 12.30 | 303 | 2.19 |
| Puglia        | Italy | 4,034.220   | 206.6   | 9.60  | 304 | 0.74 |
| Sardegna      | Italy | 1,643.577   | 68.2    | 9.90  | 293 | 0.57 |
| Sicilia       | Italy | 5,005.165   | 193.9   | 10.40 | 296 | 0.60 |
| Toscana       | Italy | 3,740.109   | 295.7   | 11.60 | 299 | 1.20 |
| Trento (Provi | Italy | 541.866     | 87.3    | 9.30  | 296 | 2.15 |

|    |                                 |        |            |         |       |     |      |
|----|---------------------------------|--------|------------|---------|-------|-----|------|
| 1  |                                 |        |            |         |       |     |      |
| 2  |                                 |        |            |         |       |     |      |
| 3  | Umbria                          | Italy  | 884.495    | 104.7   | 11.40 | 295 | 0.88 |
| 4  | Valle d'Aosta                   | Italy  | 125.953    | 38.7    | 11.70 | 297 | 3.71 |
| 5  | Veneto                          | Italy  | 4,914.725  | 267.2   | 10.00 | 313 | 1.56 |
| 6  | Aguascalientes                  | Mexico | 1,360.852  | 242.3   | 4.37  | 265 | 1.39 |
| 7  | Baja California                 | Mexico | 3,605.789  | 50.5    | 4.88  | 275 | 2.04 |
| 8  | Baja California                 | Mexico | 727.007    | 9.8     | 3.82  | 275 | 1.42 |
| 9  | Campeche                        | Mexico | 945.785    | 16.4    | 4.64  | 269 | 1.39 |
| 10 | Chiapas                         | Mexico | 5,412.679  | 73.8    | 4.53  | 266 | 0.31 |
| 11 | Chihuahua                       | Mexico | 3,832.828  | 15.5    | 7.58  | 267 | 1.58 |
| 12 | Ciudad de México                | Mexico | 10,298.920 | 6,888.8 | 6.23  | 289 | 2.06 |
| 13 | Coahuila de Zaragoza            | Mexico | 3,150.456  | 20.7    | 5.31  | 278 | 1.75 |
| 14 | Colima                          | Mexico | 749.741    | 133.2   | 4.95  | 260 | 1.50 |
| 15 | Durango                         | Mexico | 1,858.666  | 15.0    | 5.65  | 287 | 1.06 |
| 16 | Guanajuato                      | Mexico | 6,295.742  | 205.6   | 4.95  | 269 | 1.15 |
| 17 | Guerrero                        | Mexico | 3,882.954  | 61.1    | 4.86  | 274 | 0.93 |
| 18 | Hidalgo                         | Mexico | 3,072.136  | 147.6   | 4.87  | 279 | 1.46 |
| 19 | Jalisco                         | Mexico | 8,442.704  | 107.4   | 5.33  | 284 | 0.92 |
| 20 | Mexico (State)                  | Mexico | 17,378.187 | 777.5   | 4.50  | 277 | 1.44 |
| 21 | Michoacán de Ocampo             | Mexico | 4,992.690  | 85.1    | 5.55  | 280 | 0.72 |
| 22 | Morelos                         | Mexico | 2,047.959  | 419.8   | 5.49  | 278 | 0.93 |
| 23 | Nayarit                         | Mexico | 1,255.449  | 45.1    | 5.47  | 274 | 1.12 |
| 24 | Nuevo León                      | Mexico | 5,360.737  | 83.5    | 4.97  | 272 | 1.30 |
| 25 | Oaxaca                          | Mexico | 4,386.373  | 46.8    | 5.71  | 277 | 0.64 |
| 26 | Puebla                          | Mexico | 6,612.709  | 192.8   | 5.37  | 278 | 1.14 |
| 27 | Querétaro                       | Mexico | 2,094.397  | 179.0   | 4.36  | 277 | 1.19 |
| 28 | Quintana Roo                    | Mexico | 1,497.403  | 33.4    | 3.35  | 279 | 1.78 |
| 29 | San Luis Potosí                 | Mexico | 2,972.710  | 48.6    | 5.14  | 282 | 1.34 |
| 30 | Sinaloa                         | Mexico | 3,215.596  | 56.0    | 5.59  | 277 | 1.74 |
| 31 | Sonora                          | Mexico | 3,077.474  | 17.1    | 5.60  | 272 | 1.82 |
| 32 | Tabasco                         | Mexico | 2,555.914  | 103.3   | 4.98  | 275 | 1.67 |
| 33 | Tamaulipas                      | Mexico | 3,689.743  | 45.9    | 5.26  | 272 | 1.20 |
| 34 | Tlaxcala                        | Mexico | 1,345.008  | 336.5   | 4.73  | 266 | 1.45 |
| 35 | Veracruz de Ignacio de la Llave | Mexico | 8,831.401  | 122.9   | 5.90  | 277 | 0.95 |
| 36 | Yucatán                         | Mexico | 2,269.237  | 57.4    | 5.71  | 271 | 1.36 |
| 37 | Zacatecas                       | Mexico | 1,713.503  | 22.8    | 5.62  | 275 | 1.37 |
| 38 | Amazonas (F)                    | Peru   | 423.381    | 10.8    | NA    | 288 | 0.76 |
| 39 | Ancash                          | Peru   | 1,216.095  | 33.9    | NA    | 288 | 1.58 |
| 40 | Apurímac                        | Peru   | 453.951    | 21.7    | NA    | 288 | 0.45 |
| 41 | Arequipa                        | Peru   | 1,556.127  | 24.6    | NA    | 288 | 1.33 |
| 42 | Ayacucho                        | Peru   | 688.200    | 15.7    | NA    | 288 | 0.70 |
| 43 | Cajamarca                       | Peru   | 1,500.006  | 45.0    | NA    | 288 | 0.52 |
| 44 | Callao                          | Peru   | 1,119.096  | 7,669.8 | NA    | 288 | 2.25 |
| 45 | Cusco                           | Peru   | 1,350.177  | 18.8    | NA    | 288 | 0.50 |
| 46 |                                 |        |            |         |       |     |      |
| 47 |                                 |        |            |         |       |     |      |
| 48 |                                 |        |            |         |       |     |      |
| 49 |                                 |        |            |         |       |     |      |
| 50 |                                 |        |            |         |       |     |      |
| 51 |                                 |        |            |         |       |     |      |
| 52 |                                 |        |            |         |       |     |      |
| 53 |                                 |        |            |         |       |     |      |
| 54 |                                 |        |            |         |       |     |      |
| 55 |                                 |        |            |         |       |     |      |
| 56 |                                 |        |            |         |       |     |      |
| 57 |                                 |        |            |         |       |     |      |
| 58 |                                 |        |            |         |       |     |      |
| 59 |                                 |        |            |         |       |     |      |
| 60 |                                 |        |            |         |       |     |      |

1  
2  
3  
4  
5  
6  
7  
8  
9  
10  
11  
12  
13  
14  
15  
16  
17  
18  
19  
20  
21  
22  
23  
24  
25  
26  
27  
28  
29  
30  
31  
32  
33  
34  
35  
36  
37  
38  
39  
40  
41  
42  
43  
44  
45  
46  
47  
48  
49  
50  
51  
52  
53  
54  
55  
56  
57  
58  
59  
60

|                |       |            |         |    |       |     |      |
|----------------|-------|------------|---------|----|-------|-----|------|
| Huancavelica   | Peru  | 387.386    | 17.5    | NA |       | 288 | 0.48 |
| Huanuco        | Peru  | 804.804    | 21.6    | NA |       | 288 | 0.78 |
| Ica            | Peru  | 954.364    | 44.7    | NA |       | 288 | 2.39 |
| Junin          | Peru  | 1,393.373  | 31.4    | NA |       | 288 | 0.88 |
| La Libertad    | Peru  | 1,990.970  | 78.1    | NA |       | 288 | 1.58 |
| Lambayeque     | Peru  | 1,340.725  | 92.6    | NA |       | 288 | 1.83 |
| Lima           | Peru  | 10,693.435 | 307.0   | NA |       | 288 | 1.99 |
| Loreto         | Peru  | 981.170    | 2.7     | NA |       | 288 | 1.30 |
| Madre de Dios  | Peru  | 158.084    | 1.9     | NA |       | 288 | 1.25 |
| Moquegua       | Peru  | 197.521    | 12.6    | NA |       | 288 | 1.99 |
| Pasco          | Peru  | 284.581    | 11.4    | NA |       | 288 | 0.61 |
| Piura          | Peru  | 2,076.318  | 58.2    | NA |       | 288 | 1.36 |
| Puno           | Peru  | 1,316.375  | 18.3    | NA |       | 288 | 0.39 |
| San Martin     | Peru  | 909.611    | 17.7    | NA |       | 288 | 1.11 |
| Tacna          | Peru  | 371.146    | 23.1    | NA |       | 288 | 0.92 |
| Tumbes         | Peru  | 252.031    | 54.0    | NA |       | 288 | 1.74 |
| Ucayali        | Peru  | 552.917    | 5.4     | NA |       | 288 | 0.91 |
| Andalucia      | Spain | 8,349.380  | 95.3    |    | 8.33  | 295 | 0.76 |
| Aragon         | Spain | 1,315.017  | 27.6    |    | 10.26 | 300 | 2.44 |
| Asturias (Prin | Spain | 1,024.060  | 96.6    |    | 12.64 | 297 | 1.62 |
| Balears (Illes | Spain | 1,137.723  | 227.9   |    | 6.70  | 297 | 0.51 |
| Canarias       | Spain | 2,136.113  | 286.8   |    | 7.05  | 295 | 0.24 |
| Cantabria      | Spain | 579.733    | 109.0   |    | 10.33 | 291 | 0.85 |
| Castilla y Lec | Spain | 2,401.521  | 25.5    |    | 11.91 | 295 | 2.62 |
| Castilla-La M  | Spain | 2,021.012  | 25.4    |    | 9.54  | 297 | 2.49 |
| Catalunia      | Spain | 7,623.414  | 237.4   |    | 8.41  | 300 | 1.40 |
| Ceuta          | Spain | 83.673     | 4,183.6 |    | 6.29  | 281 | 0.92 |
| Comunitat Val  | Spain | 4,976.319  | 214.0   |    | 8.81  | 300 | 0.72 |
| Extremadura    | Spain | 1,063.076  | 25.5    |    | 10.56 | 298 | 1.23 |
| Galicia        | Spain | 2,697.559  | 91.2    |    | 11.57 | 294 | 0.64 |
| Madrid (Com    | Spain | 6,611.809  | 823.6   |    | 7.06  | 304 | 2.15 |
| Melilla        | Spain | 85.187     | 7,098.9 |    | 5.78  | 283 | 0.65 |
| Murcia (Regi   | Spain | 1,479.460  | 130.8   |    | 7.65  | 288 | 0.64 |
| Navarra (C. F  | Spain | 651.019    | 62.7    |    | 8.51  | 293 | 1.84 |
| Pais Vasco     | Spain | 2,202.966  | 304.5   |    | 9.89  | 304 | 1.62 |
| Rioja, La      | Spain | 315.741    | 62.6    |    | 10.00 | 299 | 2.27 |
| Alabama        | USA   | 4,944.686  | 37.6    |    | 10.92 | 282 | 1.27 |
| Alaska         | USA   | 745.469    | 0.5     |    | 5.96  | 273 | 0.37 |
| Arizona        | USA   | 7,262.286  | 24.7    |    | 8.23  | 286 | 1.56 |
| Arkansas       | USA   | 3,049.575  | 22.6    |    | 10.85 | 283 | 1.56 |
| California     | USA   | 40,011.015 | 99.0    |    | 6.78  | 297 | 0.80 |
| Colorado       | USA   | 5,762.204  | 21.4    |    | 6.79  | 290 | 1.05 |
| Connecticut    | USA   | 3,613.794  | 288.0   |    | 8.73  | 288 | 2.11 |

|    |                |     |            |         |       |     |      |
|----|----------------|-----|------------|---------|-------|-----|------|
| 1  |                |     |            |         |       |     |      |
| 2  |                |     |            |         |       |     |      |
| 3  | Delaware       | USA | 979.254    | 193.4   | 9.54  | 281 | 1.23 |
| 4  | District of Co | USA | 712.330    | 4,477.2 | 7.15  | 281 | 1.44 |
| 5  | Florida        | USA | 21,586.295 | 154.3   | 9.70  | 294 | 1.25 |
| 6  | Georgia (US)   | USA | 10,628.510 | 70.9    | 7.97  | 291 | 1.29 |
| 7  | Hawaii         | USA | 1,439.609  | 86.5    | 7.98  | 275 | 0.27 |
| 8  | Idaho          | USA | 1,774.655  | 8.3     | 8.16  | 281 | 1.05 |
| 9  | Illinois       | USA | 12,887.403 | 89.5    | 8.57  | 290 | 1.76 |
| 10 | Indiana        | USA | 6,767.587  | 72.8    | 9.84  | 290 | 1.54 |
| 11 | Iowa           | USA | 3,194.037  | 22.1    | 9.71  | 282 | 1.58 |
| 12 | Kansas         | USA | 2,945.539  | 13.9    | 9.29  | 282 | 1.21 |
| 13 | Kentucky       | USA | 4,519.893  | 43.9    | 10.82 | 287 | 0.74 |
| 14 | Louisiana      | USA | 4,713.234  | 41.8    | 9.78  | 293 | 1.98 |
| 15 | Maine          | USA | 1,355.887  | 17.0    | 10.99 | 280 | 0.33 |
| 16 | Maryland       | USA | 6,109.605  | 241.3   | 8.25  | 287 | 1.23 |
| 17 | Massachuset    | USA | 6,985.561  | 344.1   | 8.57  | 287 | 2.27 |
| 18 | Michigan       | USA | 10,114.528 | 68.7    | 9.80  | 289 | 1.63 |
| 19 | Minnesota      | USA | 5,677.124  | 27.5    | 9.96  | 282 | 1.23 |
| 20 | Mississippi    | USA | 3,019.798  | 24.9    | 10.82 | 284 | 2.04 |
| 21 | Missouri       | USA | 6,200.300  | 34.7    | 10.12 | 288 | 1.17 |
| 22 | Montana        | USA | 1,076.137  | 2.9     | 9.71  | 279 | 1.17 |
| 23 | Nebraska       | USA | 1,952.141  | 9.8     | 8.79  | 279 | 1.11 |
| 24 | Nevada         | USA | 3,070.509  | 10.8    | 8.22  | 286 | 1.30 |
| 25 | New Hampsl     | USA | 1,372.567  | 59.1    | 9.31  | 275 | 0.74 |
| 26 | New Jersey     | USA | 9,008.043  | 468.8   | 8.31  | 292 | 2.65 |
| 27 | New Mexico     | USA | 2,121.624  | 6.7     | 8.94  | 278 | 1.54 |
| 28 | New York       | USA | 19,779.540 | 161.7   | 7.83  | 294 | 2.39 |
| 29 | North Carolir  | USA | 10,501.123 | 83.2    | 9.07  | 282 | 0.83 |
| 30 | North Dakotã   | USA | 769.967    | 4.3     | 8.49  | 277 | 2.22 |
| 31 | Ohio           | USA | 11,827.215 | 111.5   | 10.61 | 287 | 0.97 |
| 32 | Oklahoma       | USA | 3,989.492  | 22.4    | 10.29 | 285 | 0.80 |
| 33 | Oregon         | USA | 4,244.225  | 17.1    | 8.84  | 290 | 0.44 |
| 34 | Pennsylvania   | USA | 12,966.170 | 111.7   | 10.59 | 288 | 1.56 |
| 35 | Rhode Island   | USA | 1,070.329  | 395.5   | 9.59  | 279 | 2.18 |
| 36 | South Carolir  | USA | 5,145.408  | 66.0    | 9.84  | 287 | 1.31 |
| 37 | South Dakotã   | USA | 893.132    | 4.5     | 9.19  | 271 | 2.25 |
| 38 | Tennessee      | USA | 6,847.752  | 64.1    | 10.44 | 285 | 1.30 |
| 39 | Texas          | USA | 28,999.321 | 42.7    | 7.00  | 290 | 1.22 |
| 40 | Utah           | USA | 3,194.497  | 15.0    | 5.81  | 279 | 0.52 |
| 41 | Vermont        | USA | 634.325    | 26.5    | 9.63  | 287 | 0.27 |
| 42 | Virginia       | USA | 8,614.990  | 84.0    | 8.10  | 287 | 0.74 |
| 43 | Washington     | USA | 7,627.572  | 44.2    | 7.70  | 311 | 0.53 |
| 44 | West Virgini;  | USA | 1,828.890  | 29.3    | 12.82 | 271 | 0.99 |
| 45 | Wisconsin      | USA | 5,882.866  | 41.8    | 9.09  | 288 | 1.13 |
| 46 |                |     |            |         |       |     |      |
| 47 |                |     |            |         |       |     |      |
| 48 |                |     |            |         |       |     |      |
| 49 |                |     |            |         |       |     |      |
| 50 |                |     |            |         |       |     |      |
| 51 |                |     |            |         |       |     |      |
| 52 |                |     |            |         |       |     |      |
| 53 |                |     |            |         |       |     |      |
| 54 |                |     |            |         |       |     |      |
| 55 |                |     |            |         |       |     |      |
| 56 |                |     |            |         |       |     |      |
| 57 |                |     |            |         |       |     |      |
| 58 |                |     |            |         |       |     |      |
| 59 |                |     |            |         |       |     |      |
| 60 |                |     |            |         |       |     |      |

1  
2  
3 Wyoming USA 584.633 2.3 8.23 256 1.07  
4  
5  
6  
7  
8  
9  
10  
11  
12  
13  
14  
15  
16  
17  
18  
19  
20  
21  
22  
23  
24  
25  
26  
27  
28  
29  
30  
31  
32  
33  
34  
35  
36  
37  
38  
39  
40  
41  
42  
43  
44  
45  
46  
47  
48  
49  
50  
51  
52  
53  
54  
55  
56  
57  
58  
59  
60

For peer review only



|    | CCMR_Est | ISCDR_Est | CDR_2020 | CCDR_2020 | e0_2020_B | e0_Diff_B | Location       |
|----|----------|-----------|----------|-----------|-----------|-----------|----------------|
|    | 0.33     | 0.42      | 6.31     | 0.06      | 65.0      | -0.16     | Afghanistan    |
|    | 0.48     | 0.60      | 8.87     | 0.41      | 78.2      | -0.48     | Albania        |
|    | 0.14     | 0.18      | 4.92     | 0.06      | 76.9      | -0.16     | Algeria        |
| NA | NA       | NA        | NA       | NA        | NA        | NA        | Andorra        |
|    | 0.08     | 0.11      | 7.87     | 0.01      | 61.3      | -0.03     | Angola         |
|    | 0.10     | 0.12      | 6.65     | 0.05      | 77.0      | -0.09     | Antigua and    |
|    | 1.37     | 1.71      | 8.65     | 0.96      | 75.4      | -1.32     | Argentina      |
|    | 1.41     | 1.76      | 10.44    | 0.95      | 73.9      | -1.02     | Armenia        |
|    | 0.65     | 0.81      | 10.01    | 0.46      | 75.8      | -0.49     | Aruba          |
|    | 0.03     | 0.04      | 6.90     | 0.04      | 83.5      | -0.06     | Australia      |
|    | 0.56     | 0.70      | 10.66    | 0.69      | 80.9      | -0.72     | Austria        |
|    | 0.59     | 0.74      | 7.15     | 0.26      | 72.6      | -0.40     | Azerbaijan     |
|    | 0.95     | 1.19      | 7.53     | 0.43      | 73.2      | -0.69     | Bahamas        |
|    | 0.79     | 0.99      | 2.67     | 0.21      | 76.8      | -0.70     | Bahrain        |
|    | 0.12     | 0.16      | 5.68     | 0.05      | 72.8      | -0.11     | Bangladesh     |
|    | 0.02     | 0.03      | 9.23     | 0.02      | 79.2      | -0.03     | Barbados       |
|    | 0.18     | 0.22      | 12.81    | 0.15      | 74.4      | -0.13     | Belarus        |
|    | 1.37     | 1.72      | 11.60    | 1.68      | 80.0      | -1.72     | Belgium        |
|    | 1.89     | 2.37      | 5.56     | 0.62      | 73.1      | -1.71     | Belize         |
|    | 0.02     | 0.02      | 8.60     | 0.00      | 62.0      | -0.01     | Benin          |
| NA | NA       | NA        | NA       | NA        | NA        | NA        | Bermuda        |
|    | 1.72     | 2.15      | 7.72     | 0.79      | 70.1      | -1.66     | Bolivia (Pluri |
|    | 1.31     | 1.64      | 12.34    | 1.23      | 76.3      | -1.13     | Bosnia and H   |
|    | 0.07     | 0.09      | 5.96     | 0.02      | 69.2      | -0.04     | Botswana       |
|    | 1.57     | 1.96      | 7.69     | 0.92      | 74.4      | -1.62     | Brazil         |
| NA | NA       | NA        | NA       | NA        | NA        | NA        | British Virgin |
|    | 0.02     | 0.02      | 4.76     | 0.01      | 76.0      | -0.02     | Brunei Darus   |
|    | 0.93     | 1.16      | 16.63    | 1.09      | 74.4      | -0.71     | Bulgaria       |
|    | 0.03     | 0.03      | 7.78     | 0.00      | 61.8      | -0.01     | Burkina Faso   |
|    | 0.00     | 0.00      | 7.66     | 0.00      | 61.8      | 0.00      | Burundi        |
|    | 0.61     | 0.76      | 5.84     | 0.20      | 72.5      | -0.41     | Cabo Verde     |
|    | 0.10     | 0.12      | 8.97     | 0.02      | 59.5      | -0.04     | Cameroon       |
|    | 0.37     | 0.46      | 8.45     | 0.41      | 82.0      | -0.55     | Canada         |
| NA | NA       | NA        | NA       | NA        | NA        | NA        | Cayman Islar   |
|    | 0.10     | 0.12      | 11.82    | 0.01      | 53.4      | -0.02     | Central Afric: |
|    | 0.05     | 0.06      | 11.73    | 0.01      | 54.4      | -0.01     | Chad           |
|    | 0.31     | 0.38      | 8.40     | 0.33      | 82.7      | -0.44     | Channel Islar  |
|    | 1.17     | 1.46      | 7.36     | 0.87      | 78.8      | -1.45     | Chile          |
|    | 0.00     | 0.01      | 7.67     | 0.00      | 77.1      | 0.00      | China          |
|    | 0.02     | 0.02      | 7.27     | 0.02      | 84.9      | -0.03     | China, Hong I  |
|    | 0.00     | 0.00      | 8.09     | 0.00      | 80.6      | 0.00      | China, Taiwa   |
|    | 1.55     | 1.94      | 6.69     | 0.85      | 75.7      | -1.68     | Colombia       |

1  
2  
3  
4  
5  
6  
7  
8  
9  
10  
11  
12  
13  
14  
15  
16  
17  
18  
19  
20  
21  
22  
23  
24  
25  
26  
27  
28  
29  
30  
31  
32  
33  
34  
35  
36  
37  
38  
39  
40  
41  
42  
43  
44  
45  
46  
47  
48  
49  
50  
51  
52  
53  
54  
55  
56  
57  
58  
59  
60

|      |      |       |      |      |       |               |
|------|------|-------|------|------|-------|---------------|
| 0.07 | 0.08 | 7.13  | 0.01 | 64.5 | -0.03 | Comoros       |
| 0.11 | 0.14 | 6.68  | 0.02 | 64.6 | -0.05 | Congo         |
| 0.67 | 0.84 | 5.83  | 0.43 | 79.5 | -0.91 | Costa Rica    |
| 0.03 | 0.04 | 9.82  | 0.01 | 58.0 | -0.01 | Cote d'Ivoire |
| 0.80 | 1.00 | 14.26 | 0.95 | 77.8 | -0.74 | Croatia       |
| 0.01 | 0.02 | 9.49  | 0.01 | 78.9 | -0.02 | Cuba          |
| 0.09 | 0.11 | 9.41  | 0.09 | 78.7 | -0.11 | Curacao       |
| 0.12 | 0.15 | 7.53  | 0.10 | 80.9 | -0.14 | Cyprus        |
| 1.00 | 1.25 | 11.96 | 1.08 | 78.4 | -1.01 | Czechia       |
| 0.04 | 0.04 | 9.17  | 0.01 | 60.9 | -0.02 | Democratic R  |
| 0.19 | 0.24 | 10.19 | 0.22 | 80.7 | -0.24 | Denmark       |
| 0.22 | 0.27 | 7.17  | 0.06 | 67.1 | -0.12 | Djibouti      |
| 0.45 | 0.57 | 6.57  | 0.22 | 73.7 | -0.52 | Dominican R   |
| 1.64 | 2.05 | 6.05  | 0.80 | 75.3 | -1.83 | Ecuador       |
| 0.23 | 0.28 | 5.85  | 0.07 | 72.0 | -0.15 | Egypt         |
| 0.41 | 0.52 | 7.40  | 0.20 | 72.9 | -0.36 | El Salvador   |
| 0.41 | 0.52 | 8.95  | 0.06 | 59.0 | -0.14 | Equatorial G  |
| 0.15 | 0.18 | 12.40 | 0.17 | 78.4 | -0.15 | Estonia       |
| 0.85 | 1.06 | 9.46  | 0.18 | 60.0 | -0.29 | Eswatini      |
| 0.08 | 0.10 | 6.40  | 0.02 | 66.8 | -0.05 | Ethiopia      |
| 0.08 | 0.10 | 10.19 | 0.10 | 81.9 | -0.11 | Finland       |
| 0.69 | 0.86 | 10.62 | 0.99 | 81.6 | -1.10 | France        |
| 0.79 | 0.98 | 3.34  | 0.24 | 79.3 | -0.78 | French Guiar  |
| 0.13 | 0.16 | 6.78  | 0.03 | 66.5 | -0.06 | Gabon         |
| 0.32 | 0.41 | 7.63  | 0.05 | 62.2 | -0.13 | Gambia        |
| 0.79 | 0.99 | 13.23 | 0.63 | 73.2 | -0.52 | Georgia       |
| 0.28 | 0.35 | 12.03 | 0.40 | 81.1 | -0.38 | Germany       |
| 0.05 | 0.06 | 7.23  | 0.01 | 64.3 | -0.02 | Ghana         |
| 0.31 | 0.39 | 11.93 | 0.46 | 81.9 | -0.44 | Greece        |
| 0.34 | 0.42 | 9.19  | 0.39 | 81.5 | -0.52 | Guadeloupe    |
| 1.18 | 1.48 | 6.21  | 0.72 | 79.0 | -1.30 | Guam          |
| 0.82 | 1.02 | 5.09  | 0.27 | 73.6 | -0.82 | Guatemala     |
| 0.04 | 0.05 | 8.16  | 0.01 | 61.7 | -0.02 | Guinea        |
| 0.15 | 0.19 | 9.38  | 0.02 | 58.4 | -0.05 | Guinea-Bissa  |
| 0.47 | 0.58 | 7.80  | 0.21 | 69.6 | -0.45 | Guyana        |
| 0.07 | 0.09 | 8.49  | 0.02 | 64.2 | -0.04 | Haiti         |
| 0.98 | 1.22 | 4.88  | 0.32 | 74.4 | -1.01 | Honduras      |
| 0.90 | 1.13 | 13.90 | 0.99 | 76.0 | -0.80 | Hungary       |
| 0.09 | 0.11 | 7.07  | 0.08 | 83.0 | -0.13 | Iceland       |
| 0.27 | 0.33 | 7.55  | 0.11 | 69.7 | -0.18 | India         |
| 0.20 | 0.25 | 6.76  | 0.08 | 71.7 | -0.14 | Indonesia     |
| 1.43 | 1.78 | 5.57  | 0.66 | 75.6 | -1.24 | Iran (Islamic |
| 1.39 | 1.73 | 5.09  | 0.32 | 69.8 | -0.86 | Iraq          |

|    |    |      |      |       |      |      |       |               |
|----|----|------|------|-------|------|------|-------|---------------|
| 1  |    |      |      |       |      |      |       |               |
| 2  |    |      |      |       |      |      |       |               |
| 3  |    | 0.52 | 0.65 | 6.85  | 0.45 | 81.7 | -0.71 | Ireland       |
| 4  |    |      |      |       |      |      |       |               |
| 5  | NA | NA   | NA   | NA    | NA   | NA   |       | Isle of Man   |
| 6  |    | 0.52 | 0.65 | 5.85  | 0.38 | 82.3 | -0.75 | Israel        |
| 7  |    | 0.76 | 0.95 | 12.13 | 1.23 | 82.4 | -1.16 | Italy         |
| 8  |    | 0.18 | 0.22 | 7.73  | 0.10 | 74.4 | -0.15 | Jamaica       |
| 9  |    | 0.01 | 0.02 | 11.62 | 0.03 | 84.6 | -0.03 | Japan         |
| 10 |    | 1.44 | 1.80 | 4.35  | 0.38 | 73.7 | -1.02 | Jordan        |
| 11 |    | 0.33 | 0.41 | 7.42  | 0.15 | 73.1 | -0.23 | Kazakhstan    |
| 12 |    | 0.19 | 0.23 | 5.50  | 0.03 | 66.6 | -0.10 | Kenya         |
| 13 |    | 0.74 | 0.93 | 3.29  | 0.22 | 75.3 | -0.47 | Kuwait        |
| 14 |    | 0.71 | 0.89 | 6.07  | 0.21 | 71.1 | -0.39 | Kyrgyzstan    |
| 15 |    | 0.28 | 0.35 | 15.46 | 0.34 | 74.9 | -0.25 | Latvia        |
| 16 |    | 0.44 | 0.55 | 4.87  | 0.22 | 78.6 | -0.47 | Lebanon       |
| 17 |    | 0.08 | 0.10 | 7.41  | 0.02 | 64.2 | -0.04 | Liberia       |
| 18 |    | 0.72 | 0.90 | 5.42  | 0.22 | 72.6 | -0.46 | Libya         |
| 19 |    |      |      |       |      |      |       |               |
| 20 |    |      |      |       |      |      |       |               |
| 21 |    |      |      |       |      |      |       |               |
| 22 | NA | NA   | NA   | NA    | NA   | NA   |       | Liechtensteir |
| 23 |    | 0.41 | 0.52 | 15.09 | 0.54 | 75.4 | -0.42 | Lithuania     |
| 24 |    | 0.83 | 1.03 | 8.08  | 0.79 | 81.2 | -1.10 | Luxembourg    |
| 25 |    | 0.06 | 0.07 | 5.93  | 0.01 | 67.3 | -0.03 | Madagascar    |
| 26 |    | 0.06 | 0.08 | 6.41  | 0.01 | 64.4 | -0.03 | Malawi        |
| 27 |    | 0.03 | 0.04 | 5.41  | 0.01 | 76.3 | -0.03 | Malaysia      |
| 28 |    | 0.36 | 0.44 | 2.81  | 0.09 | 79.0 | -0.33 | Maldives      |
| 29 |    | 0.09 | 0.11 | 9.24  | 0.01 | 59.6 | -0.03 | Mali          |
| 30 |    | 0.45 | 0.57 | 9.34  | 0.50 | 82.0 | -0.57 | Malta         |
| 31 |    | 0.08 | 0.11 | 9.92  | 0.11 | 82.3 | -0.13 | Martinique    |
| 32 |    | 0.38 | 0.48 | 7.15  | 0.07 | 64.8 | -0.18 | Mauritania    |
| 33 |    | 0.01 | 0.01 | 8.88  | 0.01 | 75.1 | -0.01 | Mauritius     |
| 34 |    | 0.75 | 0.94 | 3.03  | 0.20 | 78.7 | -0.89 | Mayotte       |
| 35 |    | 2.01 | 2.51 | 7.18  | 0.98 | 73.3 | -1.83 | Mexico (Cour  |
| 36 |    |      |      |       |      |      |       |               |
| 37 |    |      |      |       |      |      |       |               |
| 38 |    |      |      |       |      |      |       |               |
| 39 |    |      |      |       |      |      |       |               |
| 40 | NA | NA   | NA   | NA    | NA   | NA   |       | Monaco        |
| 41 |    | 1.29 | 1.61 | 11.92 | 1.09 | 75.9 | -1.01 | Montenegro    |
| 42 | NA | NA   | NA   | NA    | NA   | NA   |       | Montserrat    |
| 43 |    | 0.44 | 0.55 | 5.40  | 0.20 | 76.5 | -0.37 | Morocco       |
| 44 |    | 0.04 | 0.05 | 8.16  | 0.01 | 60.9 | -0.01 | Mozambique    |
| 45 |    | 0.14 | 0.18 | 8.47  | 0.05 | 67.1 | -0.07 | Myanmar       |
| 46 |    | 0.24 | 0.30 | 6.44  | 0.06 | 70.8 | -0.12 | Nepal         |
| 47 |    | 0.55 | 0.69 | 9.82  | 0.67 | 81.6 | -0.75 | Netherlands   |
| 48 |    | 0.01 | 0.01 | 7.26  | 0.01 | 82.4 | -0.01 | New Zealand   |
| 49 |    | 0.07 | 0.09 | 5.22  | 0.02 | 74.5 | -0.07 | Nicaragua     |
| 50 |    | 0.03 | 0.04 | 7.90  | 0.00 | 62.7 | -0.01 | Niger         |
| 51 |    | 0.04 | 0.05 | 11.47 | 0.01 | 54.9 | -0.01 | Nigeria       |
| 52 |    | 1.57 | 1.96 | 11.52 | 1.20 | 74.8 | -1.14 | North Maced   |
| 53 |    |      |      |       |      |      |       |               |
| 54 |    |      |      |       |      |      |       |               |
| 55 | NA | NA   | NA   | NA    | NA   | NA   |       | Northern Ma   |
| 56 |    |      |      |       |      |      |       |               |
| 57 |    |      |      |       |      |      |       |               |
| 58 |    |      |      |       |      |      |       |               |
| 59 |    |      |      |       |      |      |       |               |
| 60 |    |      |      |       |      |      |       |               |

1  
2  
3  
4  
5  
6  
7  
8  
9  
10  
11  
12  
13  
14  
15  
16  
17  
18  
19  
20  
21  
22  
23  
24  
25  
26  
27  
28  
29  
30  
31  
32  
33  
34  
35  
36  
37  
38  
39  
40  
41  
42  
43  
44  
45  
46  
47  
48  
49  
50  
51  
52  
53  
54  
55  
56  
57  
58  
59  
60

|    |      |      |       |      |      |       |               |
|----|------|------|-------|------|------|-------|---------------|
|    | 0.08 | 0.09 | 8.09  | 0.08 | 82.4 | -0.11 | Norway        |
|    | 1.28 | 1.60 | 2.79  | 0.29 | 77.0 | -1.33 | Oman          |
|    | 0.16 | 0.21 | 6.98  | 0.05 | 67.3 | -0.10 | Pakistan      |
|    | 1.61 | 2.02 | 6.24  | 0.93 | 76.5 | -2.22 | Panama        |
|    | 0.78 | 0.97 | 5.99  | 0.32 | 73.7 | -0.70 | Paraguay      |
|    | 2.14 | 2.68 | 7.07  | 1.14 | 74.8 | -2.09 | Peru          |
|    | 0.22 | 0.27 | 6.13  | 0.08 | 71.2 | -0.19 | Philippines   |
|    | 0.69 | 0.87 | 11.34 | 0.75 | 78.0 | -0.78 | Poland        |
|    | 0.48 | 0.61 | 11.92 | 0.68 | 81.4 | -0.63 | Portugal      |
|    | 0.43 | 0.53 | 10.87 | 0.53 | 79.5 | -0.57 | Puerto Rico   |
|    | 0.38 | 0.48 | 1.46  | 0.09 | 80.2 | -0.51 | Qatar         |
|    | 0.02 | 0.02 | 6.74  | 0.02 | 82.9 | -0.03 | Republic of K |
|    | 1.09 | 1.37 | 12.68 | 0.74 | 71.2 | -0.65 | Republic of N |
|    | 0.08 | 0.10 | 6.43  | 0.05 | 80.6 | -0.09 | Reunion       |
|    | 0.78 | 0.97 | 14.05 | 0.82 | 75.4 | -0.65 | Romania       |
|    | 0.46 | 0.58 | 13.24 | 0.39 | 72.1 | -0.33 | Russian Fede  |
|    | 0.05 | 0.06 | 5.25  | 0.01 | 69.1 | -0.02 | Rwanda        |
| NA | NA   | NA   | NA    | NA   | NA   | NA    | Saint Martin  |
| NA | NA   | NA   | NA    | NA   | NA   | NA    | San Marino    |
|    | 0.45 | 0.56 | 4.76  | 0.08 | 70.2 | -0.23 | Sao Tome an   |
|    | 0.61 | 0.76 | 3.87  | 0.18 | 75.0 | -0.46 | Saudi Arabia  |
|    | 0.14 | 0.17 | 5.57  | 0.02 | 67.9 | -0.07 | Senegal       |
|    | 0.53 | 0.66 | 13.74 | 0.52 | 75.7 | -0.41 | Serbia        |
|    | 0.06 | 0.07 | 11.40 | 0.01 | 54.9 | -0.02 | Sierra Leone  |
| NA | NA   | NA   | NA    | NA   | NA   | NA    | Siint Maarter |
|    | 0.01 | 0.01 | 5.09  | 0.00 | 83.7 | -0.01 | Singapore     |
|    | 0.46 | 0.58 | 10.68 | 0.39 | 77.1 | -0.40 | Slovakia      |
|    | 1.04 | 1.31 | 11.82 | 1.30 | 80.1 | -1.24 | Slovenia      |
|    | 0.05 | 0.06 | 10.56 | 0.01 | 57.6 | -0.02 | Somalia       |
|    | 1.54 | 1.92 | 9.99  | 0.48 | 63.6 | -0.64 | South Africa  |
|    | 0.03 | 0.04 | 10.24 | 0.01 | 58.0 | -0.01 | South Sudan   |
|    | 0.77 | 0.97 | 10.77 | 1.09 | 82.4 | -1.18 | Spain         |
|    | 0.02 | 0.02 | 7.01  | 0.01 | 77.0 | -0.01 | Sri Lanka     |
|    | 1.33 | 1.66 | 3.77  | 0.27 | 73.3 | -0.93 | State of Pale |
|    | 0.14 | 0.18 | 7.15  | 0.03 | 65.4 | -0.09 | Sudan         |
|    | 0.49 | 0.62 | 7.74  | 0.21 | 71.5 | -0.33 | Suriname      |
|    | 0.70 | 0.88 | 10.05 | 0.86 | 81.9 | -0.96 | Sweden        |
|    | 0.70 | 0.88 | 9.20  | 0.88 | 82.7 | -1.07 | Switzerland   |
|    | 0.13 | 0.17 | 5.07  | 0.04 | 73.7 | -0.10 | Syrian Arab F |
|    | 0.05 | 0.06 | 4.74  | 0.01 | 71.2 | -0.02 | Tajikistan    |
|    | 0.00 | 0.00 | 8.17  | 0.00 | 77.2 | 0.00  | Thailand      |
|    | 0.05 | 0.06 | 8.27  | 0.01 | 61.3 | -0.02 | Togo          |
|    | 0.14 | 0.18 | 8.89  | 0.09 | 73.5 | -0.12 | Trinidad and  |

|    |    |      |      |       |      |      |                     |
|----|----|------|------|-------|------|------|---------------------|
| 1  |    |      |      |       |      |      |                     |
| 2  |    |      |      |       |      |      |                     |
| 3  |    | 0.74 | 0.92 | 6.78  | 0.40 | 76.2 | -0.63 Tunisia       |
| 4  |    | 0.46 | 0.58 | 5.90  | 0.25 | 77.3 | -0.46 Turkey        |
| 5  |    |      |      |       |      |      |                     |
| 6  | NA | NA   | NA   | NA    | NA   | NA   | Turks and Ca        |
| 7  |    | 0.48 | 0.59 | 15.40 | 0.44 | 71.6 | -0.31 Ukraine       |
| 8  |    | 0.32 | 0.40 | 1.77  | 0.07 | 78.1 | -0.32 United Arab I |
| 9  |    |      |      |       |      |      |                     |
| 10 |    | 0.91 | 1.13 | 10.59 | 1.08 | 80.2 | -1.18 United Kingd  |
| 11 |    | 0.00 | 0.00 | 6.26  | 0.00 | 65.6 | 0.00 United Republ  |
| 12 |    | 1.00 | 1.25 | 10.10 | 1.04 | 77.7 | -1.26 United State: |
| 13 |    | 0.22 | 0.28 | 9.53  | 0.22 | 80.4 | -0.25 United State: |
| 14 |    | 0.06 | 0.07 | 9.71  | 0.05 | 77.8 | -0.06 Uruguay       |
| 15 |    | 0.06 | 0.07 | 5.90  | 0.02 | 71.7 | -0.04 Uzbekistan    |
| 16 |    | 0.08 | 0.10 | 7.33  | 0.04 | 72.2 | -0.06 Venezuela (B  |
| 17 |    | 0.13 | 0.16 | 6.00  | 0.02 | 66.1 | -0.06 Yemen         |
| 18 |    | 0.15 | 0.19 | 6.35  | 0.02 | 63.8 | -0.07 Zambia        |
| 19 |    | 0.13 | 0.17 | 7.84  | 0.02 | 61.3 | -0.05 Zimbabwe      |
| 20 |    | 1.64 | 2.05 | NA    | NA   | NA   | Acre                |
| 21 |    | 1.32 | 1.65 | NA    | NA   | NA   | Alagoas             |
| 22 |    | 1.97 | 2.46 | NA    | NA   | NA   | Amapa               |
| 23 |    | 2.21 | 2.77 | NA    | NA   | NA   | Amazonas (B         |
| 24 |    | 1.08 | 1.35 | NA    | NA   | NA   | Bahia               |
| 25 |    | 1.91 | 2.38 | NA    | NA   | NA   | Ceara               |
| 26 |    | 2.49 | 3.11 | NA    | NA   | NA   | Distrito Fede       |
| 27 |    | 2.26 | 2.82 | NA    | NA   | NA   | Espirito Santi      |
| 28 |    | 1.69 | 2.11 | NA    | NA   | NA   | Goias               |
| 29 |    | 1.12 | 1.40 | NA    | NA   | NA   | Maranhao            |
| 30 |    | 2.29 | 2.87 | NA    | NA   | NA   | Mato Grosso         |
| 31 |    | 1.49 | 1.86 | NA    | NA   | NA   | Mato Grosso         |
| 32 |    | 0.99 | 1.24 | NA    | NA   | NA   | Minas Gerais        |
| 33 |    | 1.49 | 1.86 | NA    | NA   | NA   | Para                |
| 34 |    | 1.63 | 2.03 | NA    | NA   | NA   | Paraiba             |
| 35 |    | 1.22 | 1.52 | NA    | NA   | NA   | Parana              |
| 36 |    | 1.75 | 2.19 | NA    | NA   | NA   | Pernambuco          |
| 37 |    | 1.58 | 1.98 | NA    | NA   | NA   | Piaui               |
| 38 |    | 2.52 | 3.14 | NA    | NA   | NA   | Rio de Janeir       |
| 39 |    | 1.50 | 1.88 | NA    | NA   | NA   | Rio Grande d        |
| 40 |    | 1.35 | 1.69 | NA    | NA   | NA   | Rio Grande d        |
| 41 |    | 1.88 | 2.34 | NA    | NA   | NA   | Rondonia            |
| 42 |    | 2.32 | 2.90 | NA    | NA   | NA   | Roraima             |
| 43 |    | 1.28 | 1.60 | NA    | NA   | NA   | Santa Catarir       |
| 44 |    | 1.72 | 2.15 | NA    | NA   | NA   | Sao Paulo           |
| 45 |    | 1.93 | 2.41 | NA    | NA   | NA   | Sergipe             |
| 46 |    | 1.47 | 1.84 | NA    | NA   | NA   | Tocantins           |
| 47 |    | 0.00 | 0.00 | NA    | NA   | NA   | Anhui               |
| 48 |    |      |      |       |      |      |                     |
| 49 |    |      |      |       |      |      |                     |
| 50 |    |      |      |       |      |      |                     |
| 51 |    |      |      |       |      |      |                     |
| 52 |    |      |      |       |      |      |                     |
| 53 |    |      |      |       |      |      |                     |
| 54 |    |      |      |       |      |      |                     |
| 55 |    |      |      |       |      |      |                     |
| 56 |    |      |      |       |      |      |                     |
| 57 |    |      |      |       |      |      |                     |
| 58 |    |      |      |       |      |      |                     |
| 59 |    |      |      |       |      |      |                     |
| 60 |    |      |      |       |      |      |                     |

|    |      |      |       |      |      |       |               |
|----|------|------|-------|------|------|-------|---------------|
| 1  |      |      |       |      |      |       |               |
| 2  |      |      |       |      |      |       |               |
| 3  | 0.00 | 0.00 | NA    | NA   | NA   | NA    | Beijing       |
| 4  | 0.00 | 0.00 | NA    | NA   | NA   | NA    | Chongqing     |
| 5  | 0.00 | 0.00 | NA    | NA   | NA   | NA    | Fujian        |
| 6  | 0.00 | 0.00 | NA    | NA   | NA   | NA    | Gansu         |
| 7  | 0.00 | 0.00 | NA    | NA   | NA   | NA    | Guangdong     |
| 8  | 0.00 | 0.00 | NA    | NA   | NA   | NA    | Guangxi       |
| 9  | 0.00 | 0.00 | NA    | NA   | NA   | NA    | Guizhou       |
| 10 | 0.00 | 0.00 | NA    | NA   | NA   | NA    | Hainan        |
| 11 | 0.00 | 0.00 | NA    | NA   | NA   | NA    | Hebei         |
| 12 | 0.00 | 0.00 | NA    | NA   | NA   | NA    | Heilongjiang  |
| 13 | 0.00 | 0.00 | NA    | NA   | NA   | NA    | Henan         |
| 14 | 0.00 | 0.00 | NA    | NA   | NA   | NA    | Hubei         |
| 15 | 0.00 | 0.00 | NA    | NA   | NA   | NA    | Hunan         |
| 16 | 0.09 | 0.11 | NA    | NA   | NA   | NA    | Inner Mongol  |
| 17 | 0.00 | 0.00 | NA    | NA   | NA   | NA    | Jiangxi       |
| 18 | 0.00 | 0.00 | NA    | NA   | NA   | NA    | Jilin         |
| 19 | 0.00 | 0.00 | NA    | NA   | NA   | NA    | Liaoning      |
| 20 | 0.00 | 0.00 | NA    | NA   | NA   | NA    | Shaanxi       |
| 21 | 0.00 | 0.00 | NA    | NA   | NA   | NA    | Shandong      |
| 22 | 0.00 | 0.00 | NA    | NA   | NA   | NA    | Shanghai      |
| 23 | 0.00 | 0.00 | NA    | NA   | NA   | NA    | Sichuan       |
| 24 | 0.00 | 0.00 | NA    | NA   | NA   | NA    | Tianjin       |
| 25 | 0.00 | 0.00 | NA    | NA   | NA   | NA    | Xinjiang      |
| 26 | 0.00 | 0.00 | NA    | NA   | NA   | NA    | Yunnan        |
| 27 | 0.00 | 0.00 | NA    | NA   | NA   | NA    | Zhejiang      |
| 28 | 0.57 | 0.71 | 12.66 | 0.92 | 82.0 | -0.83 | Abruzzo       |
| 29 | 0.30 | 0.37 | 12.09 | 0.45 | 81.7 | -0.42 | Basilicata    |
| 30 | 1.04 | 1.29 | 10.34 | 1.39 | 81.8 | -1.57 | Bolzano (Pro  |
| 31 | 0.17 | 0.21 | 11.00 | 0.24 | 81.8 | -0.24 | Calabria      |
| 32 | 0.40 | 0.50 | 10.18 | 0.49 | 80.7 | -0.53 | Campania      |
| 33 | 1.00 | 1.25 | 13.28 | 1.73 | 81.8 | -1.54 | Emilia-Roma   |
| 34 | 0.77 | 0.96 | 13.55 | 1.35 | 82.2 | -1.16 | Friuli-Venezi |
| 35 | 0.43 | 0.54 | 10.94 | 0.64 | 82.2 | -0.65 | Lazio         |
| 36 | 0.92 | 1.16 | 16.50 | 1.86 | 81.3 | -1.33 | Liguria       |
| 37 | 1.56 | 1.95 | 12.90 | 2.49 | 80.9 | -2.32 | Lombardia     |
| 38 | 0.58 | 0.73 | 12.89 | 1.03 | 82.8 | -0.91 | Marche        |
| 39 | 0.37 | 0.46 | 13.23 | 0.62 | 82.4 | -0.54 | Molise        |
| 40 | 1.04 | 1.30 | 14.58 | 1.81 | 81.0 | -1.45 | Piemonte      |
| 41 | 0.42 | 0.52 | 10.82 | 0.61 | 82.2 | -0.63 | Puglia        |
| 42 | 0.30 | 0.37 | 11.06 | 0.45 | 82.6 | -0.46 | Sardegna      |
| 43 | 0.35 | 0.43 | 11.30 | 0.48 | 81.0 | -0.47 | Sicilia       |
| 44 | 0.57 | 0.71 | 13.01 | 0.98 | 82.7 | -0.86 | Toscana       |
| 45 | 1.17 | 1.46 | 11.47 | 1.74 | 82.0 | -1.81 | Trento (Provi |
| 46 |      |      |       |      |      |       |               |
| 47 |      |      |       |      |      |       |               |
| 48 |      |      |       |      |      |       |               |
| 49 |      |      |       |      |      |       |               |
| 50 |      |      |       |      |      |       |               |
| 51 |      |      |       |      |      |       |               |
| 52 |      |      |       |      |      |       |               |
| 53 |      |      |       |      |      |       |               |
| 54 |      |      |       |      |      |       |               |
| 55 |      |      |       |      |      |       |               |
| 56 |      |      |       |      |      |       |               |
| 57 |      |      |       |      |      |       |               |
| 58 |      |      |       |      |      |       |               |
| 59 |      |      |       |      |      |       |               |
| 60 |      |      |       |      |      |       |               |

|    |      |      |       |      |      |                     |
|----|------|------|-------|------|------|---------------------|
| 1  |      |      |       |      |      |                     |
| 2  |      |      |       |      |      |                     |
| 3  | 0.40 | 0.51 | 12.77 | 0.71 | 83.1 | -0.63 Umbria        |
| 4  | 1.89 | 2.36 | 15.30 | 3.01 | 79.2 | -2.36 Valle d'Aosta |
| 5  | 0.83 | 1.03 | 11.77 | 1.33 | 82.2 | -1.29 Veneto        |
| 6  | 2.63 | 3.28 | 6.25  | 1.01 | 73.6 | -2.23 Aguascalient  |
| 7  | 4.32 | 5.40 | 6.30  | 1.53 | 72.4 | -3.54 Baja Californ |
| 8  | 3.00 | 3.74 | 5.87  | 1.07 | 73.3 | -2.60 Baja Californ |
| 9  | 2.37 | 2.96 | 7.08  | 1.02 | 72.8 | -1.96 Campeche      |
| 10 | 0.61 | 0.76 | 5.74  | 0.22 | 73.7 | -0.54 Chiapas       |
| 11 | 2.83 | 3.54 | 6.78  | 1.15 | 73.1 | -2.37 Chihuahua     |
| 12 | 2.73 | 3.42 | 8.48  | 1.63 | 73.9 | -2.56 Ciudad de Me  |
| 13 | 3.09 | 3.85 | 6.96  | 1.33 | 73.1 | -2.64 Coahuila de Z |
| 14 | 2.33 | 2.91 | 7.37  | 1.07 | 73.6 | -1.93 Colima        |
| 15 | 1.72 | 2.15 | 7.03  | 0.83 | 73.5 | -1.58 Durango       |
| 16 | 1.89 | 2.36 | 6.95  | 0.85 | 73.5 | -1.64 Guanajuato    |
| 17 | 1.41 | 1.76 | 8.03  | 0.70 | 72.1 | -1.13 Guerrero      |
| 18 | 2.23 | 2.79 | 7.70  | 1.11 | 73.1 | -1.91 Hidalgo       |
| 19 | 1.45 | 1.81 | 6.99  | 0.71 | 74.1 | -1.34 Jalisco       |
| 20 | 2.81 | 3.51 | 6.34  | 1.09 | 73.0 | -2.43 Mexico (Stat  |
| 21 | 1.01 | 1.26 | 7.67  | 0.55 | 73.9 | -0.93 Michoacan d   |
| 22 | 1.36 | 1.69 | 7.53  | 0.71 | 74.0 | -1.22 Morelos       |
| 23 | 1.61 | 2.01 | 7.64  | 0.84 | 73.9 | -1.42 Nayarit       |
| 24 | 2.23 | 2.78 | 6.67  | 0.96 | 74.0 | -1.97 Nuevo Leon    |
| 25 | 0.86 | 1.08 | 8.10  | 0.48 | 73.3 | -0.76 Oaxaca        |
| 26 | 1.81 | 2.26 | 7.26  | 0.86 | 73.1 | -1.59 Puebla        |
| 27 | 2.24 | 2.80 | 6.23  | 0.90 | 73.6 | -2.00 Queretaro     |
| 28 | 4.96 | 6.20 | 5.33  | 1.35 | 71.6 | -3.93 Quintana Ro   |
| 29 | 1.91 | 2.39 | 8.02  | 1.03 | 73.2 | -1.67 San Luis Potc |
| 30 | 2.73 | 3.41 | 7.73  | 1.32 | 72.8 | -2.30 Sinaloa       |
| 31 | 3.12 | 3.90 | 7.24  | 1.35 | 72.8 | -2.58 Sonora        |
| 32 | 3.09 | 3.85 | 6.83  | 1.25 | 72.5 | -2.55 Tabasco       |
| 33 | 1.99 | 2.49 | 6.98  | 0.89 | 73.5 | -1.72 Tamaulipas    |
| 34 | 2.35 | 2.94 | 7.16  | 1.05 | 73.2 | -1.98 Tlaxcala      |
| 35 | 1.35 | 1.68 | 7.97  | 0.72 | 73.3 | -1.16 Veracruz de I |
| 36 | 1.99 | 2.48 | 7.95  | 1.01 | 73.0 | -1.66 Yucatan       |
| 37 | 1.88 | 2.35 | 8.10  | 1.03 | 73.4 | -1.65 Zacatecas     |
| 38 | 1.25 | 1.56 | 13.72 | 0.60 | 68.3 | -0.68 Amazonas (P   |
| 39 | 2.03 | 2.53 | 16.52 | 1.25 | 69.9 | -1.33 Ancash        |
| 40 | 0.60 | 0.75 | 16.52 | 0.35 | 68.4 | -0.34 Apurimac      |
| 41 | 1.85 | 2.31 | 13.46 | 1.05 | 71.7 | -1.35 Arequipa      |
| 42 | 1.00 | 1.25 | 15.46 | 0.55 | 68.7 | -0.57 Ayacucho      |
| 43 | 0.74 | 0.92 | 14.55 | 0.41 | 70.4 | -0.46 Cajamarca     |
| 44 | 3.28 | 4.10 | 13.04 | 1.77 | 71.9 | -2.31 Callao        |
| 45 | 0.80 | 1.00 | 13.71 | 0.39 | 68.2 | -0.46 Cusco         |
| 46 |      |      |       |      |      |                     |
| 47 |      |      |       |      |      |                     |
| 48 |      |      |       |      |      |                     |
| 49 |      |      |       |      |      |                     |
| 50 |      |      |       |      |      |                     |
| 51 |      |      |       |      |      |                     |
| 52 |      |      |       |      |      |                     |
| 53 |      |      |       |      |      |                     |
| 54 |      |      |       |      |      |                     |
| 55 |      |      |       |      |      |                     |
| 56 |      |      |       |      |      |                     |
| 57 |      |      |       |      |      |                     |
| 58 |      |      |       |      |      |                     |
| 59 |      |      |       |      |      |                     |
| 60 |      |      |       |      |      |                     |

1  
2  
3  
4  
5  
6  
7  
8  
9  
10  
11  
12  
13  
14  
15  
16  
17  
18  
19  
20  
21  
22  
23  
24  
25  
26  
27  
28  
29  
30  
31  
32  
33  
34  
35  
36  
37  
38  
39  
40  
41  
42  
43  
44  
45  
46  
47  
48  
49  
50  
51  
52  
53  
54  
55  
56  
57  
58  
59  
60

|      |      |       |      |      |       |                |
|------|------|-------|------|------|-------|----------------|
| 0.67 | 0.83 | 16.70 | 0.38 | 68.2 | -0.35 | Huancavelica   |
| 1.28 | 1.60 | 13.14 | 0.61 | 68.8 | -0.79 | Huanuco        |
| 3.56 | 4.45 | 13.34 | 1.88 | 71.0 | -2.46 | Ica            |
| 1.37 | 1.71 | 13.73 | 0.69 | 68.8 | -0.84 | Junin          |
| 2.32 | 2.89 | 13.60 | 1.24 | 70.9 | -1.63 | La Libertad    |
| 2.55 | 3.19 | 13.86 | 1.44 | 71.0 | -1.82 | Lambayeque     |
| 2.77 | 3.46 | 13.64 | 1.57 | 71.8 | -1.96 | Lima           |
| 2.66 | 3.32 | 11.08 | 1.03 | 68.5 | -1.46 | Loreto         |
| 3.42 | 4.28 | 7.48  | 0.98 | 68.2 | -1.99 | Madre de Dic   |
| 2.65 | 3.30 | 14.57 | 1.56 | 70.9 | -1.81 | Moquegua       |
| 1.11 | 1.39 | 11.91 | 0.48 | 68.8 | -0.68 | Pasco          |
| 2.12 | 2.65 | 13.05 | 1.07 | 70.2 | -1.34 | Piura          |
| 0.54 | 0.68 | 15.30 | 0.31 | 68.2 | -0.33 | Puno           |
| 2.11 | 2.64 | 11.55 | 0.88 | 68.4 | -1.20 | San Martin     |
| 1.55 | 1.94 | 11.19 | 0.73 | 70.6 | -1.03 | Tacna          |
| 3.04 | 3.79 | 11.54 | 1.37 | 69.7 | -1.86 | Tumbes         |
| 2.03 | 2.54 | 9.72  | 0.71 | 68.0 | -1.16 | Ucayali        |
| 0.52 | 0.65 | 9.94  | 0.61 | 81.5 | -0.68 | Andalucia      |
| 1.22 | 1.53 | 13.52 | 2.00 | 82.0 | -1.81 | Aragon         |
| 0.72 | 0.89 | 15.13 | 1.31 | 82.0 | -1.02 | Asturias (Pri  |
| 0.38 | 0.47 | 7.89  | 0.41 | 83.1 | -0.57 | Balears (Illes |
| 0.18 | 0.23 | 8.16  | 0.19 | 82.3 | -0.26 | Canarias       |
| 0.44 | 0.55 | 11.86 | 0.68 | 83.1 | -0.66 | Cantabria      |
| 1.10 | 1.37 | 15.35 | 2.12 | 82.6 | -1.71 | Castilla y Leo |
| 1.38 | 1.73 | 12.47 | 2.02 | 81.9 | -1.98 | Castilla-La M  |
| 0.85 | 1.06 | 10.51 | 1.14 | 82.5 | -1.27 | Catalunia      |
| 0.90 | 1.12 | 7.61  | 0.71 | 80.0 | -1.04 | Ceuta          |
| 0.44 | 0.56 | 10.29 | 0.59 | 82.3 | -0.64 | Comunitat V:   |
| 0.65 | 0.82 | 12.62 | 1.00 | 82.1 | -0.92 | Extremadura    |
| 0.29 | 0.36 | 13.52 | 0.51 | 83.0 | -0.44 | Galicia        |
| 1.39 | 1.73 | 9.62  | 1.79 | 82.8 | -2.26 | Madrid (Com    |
| 0.71 | 0.88 | 6.95  | 0.50 | 79.9 | -0.79 | Melilla        |
| 0.47 | 0.58 | 8.75  | 0.50 | 82.4 | -0.63 | Murcia (Regi   |
| 1.05 | 1.31 | 11.03 | 1.47 | 82.9 | -1.58 | Navarra (C. F  |
| 0.84 | 1.04 | 12.17 | 1.35 | 82.7 | -1.30 | Pais Vasco     |
| 1.18 | 1.48 | 12.76 | 1.86 | 82.3 | -1.76 | Rioja, La      |
| 1.01 | 1.26 | 12.34 | 0.98 | 74.7 | -0.94 | Alabama        |
| 0.41 | 0.51 | 7.01  | 0.28 | 78.2 | -0.51 | Alaska         |
| 1.19 | 1.49 | 9.84  | 1.22 | 78.2 | -1.58 | Arizona        |
| 1.22 | 1.53 | 12.37 | 1.21 | 74.9 | -1.17 | Arkansas       |
| 0.69 | 0.86 | 7.89  | 0.65 | 80.0 | -1.02 | California     |
| 0.97 | 1.21 | 8.08  | 0.84 | 78.9 | -1.24 | Colorado       |
| 1.50 | 1.87 | 10.92 | 1.66 | 78.4 | -1.85 | Connecticut    |



|    |      |      |       |      |      |                      |
|----|------|------|-------|------|------|----------------------|
| 1  |      |      |       |      |      |                      |
| 2  |      |      |       |      |      |                      |
| 3  | 0.90 | 1.12 | 10.97 | 0.95 | 77.5 | -1.03 Delaware       |
| 4  | 1.46 | 1.83 | 8.80  | 1.10 | 76.2 | -1.72 District of Co |
| 5  | 0.79 | 0.98 | 11.14 | 1.00 | 78.7 | -1.15 Florida        |
| 6  | 1.24 | 1.55 | 9.47  | 1.03 | 76.4 | -1.34 Georgia (US/   |
| 7  | 0.18 | 0.22 | 8.62  | 0.20 | 81.8 | -0.30 Hawaii         |
| 8  | 0.88 | 1.10 | 9.35  | 0.81 | 78.3 | -1.01 Idaho          |
| 9  | 1.41 | 1.76 | 10.45 | 1.40 | 77.5 | -1.64 Illinois       |
| 10 | 1.26 | 1.57 | 11.38 | 1.22 | 75.9 | -1.28 Indiana        |
| 11 | 1.15 | 1.43 | 11.15 | 1.22 | 77.9 | -1.30 Iowa           |
| 12 | 0.94 | 1.17 | 10.59 | 0.93 | 77.5 | -1.05 Kansas         |
| 13 | 0.60 | 0.75 | 12.06 | 0.58 | 74.8 | -0.56 Kentucky       |
| 14 | 1.72 | 2.14 | 11.57 | 1.59 | 74.7 | -1.71 Louisiana      |
| 15 | 0.21 | 0.26 | 12.03 | 0.26 | 78.3 | -0.24 Maine          |
| 16 | 1.02 | 1.28 | 9.58  | 0.96 | 77.8 | -1.25 Maryland       |
| 17 | 1.72 | 2.15 | 10.67 | 1.78 | 77.9 | -2.05 Massachuset    |
| 18 | 1.23 | 1.53 | 11.59 | 1.29 | 76.6 | -1.33 Michigan       |
| 19 | 0.97 | 1.21 | 9.27  | 0.95 | 79.4 | -1.21 Minnesota      |
| 20 | 1.75 | 2.18 | 12.59 | 1.59 | 73.7 | -1.52 Mississippi    |
| 21 | 0.89 | 1.11 | 11.35 | 0.92 | 76.6 | -0.97 Missouri       |
| 22 | 0.84 | 1.05 | 10.79 | 0.89 | 77.8 | -0.97 Montana        |
| 23 | 0.87 | 1.09 | 9.89  | 0.85 | 78.6 | -1.02 Nebraska       |
| 24 | 1.12 | 1.40 | 9.77  | 1.02 | 77.1 | -1.29 Nevada         |
| 25 | 0.52 | 0.65 | 10.59 | 0.55 | 78.5 | -0.60 New Hampsh     |
| 26 | 2.02 | 2.52 | 10.94 | 2.11 | 77.6 | -2.43 New Jersey     |
| 27 | 1.17 | 1.47 | 10.62 | 1.17 | 76.7 | -1.39 New Mexico     |
| 28 | 1.81 | 2.26 | 10.45 | 1.92 | 78.2 | -2.35 New York       |
| 29 | 0.68 | 0.86 | 10.15 | 0.64 | 77.2 | -0.75 North Carolir  |
| 30 | 1.70 | 2.13 | 10.54 | 1.68 | 77.7 | -2.02 North Dakota   |
| 31 | 0.72 | 0.91 | 11.67 | 0.76 | 76.3 | -0.76 Ohio           |
| 32 | 0.66 | 0.82 | 11.27 | 0.62 | 75.5 | -0.66 Oklahoma       |
| 33 | 0.33 | 0.42 | 9.59  | 0.35 | 79.1 | -0.42 Oregon         |
| 34 | 1.08 | 1.35 | 12.18 | 1.23 | 77.0 | -1.20 Pennsylvania   |
| 35 | 1.55 | 1.94 | 11.39 | 1.66 | 77.8 | -1.79 Rhode Island   |
| 36 | 1.04 | 1.29 | 11.36 | 1.03 | 76.0 | -1.08 South Carolir  |
| 37 | 1.66 | 2.08 | 11.16 | 1.67 | 77.4 | -1.85 South Dakota   |
| 38 | 1.06 | 1.33 | 11.74 | 1.01 | 75.2 | -1.03 Tennessee      |
| 39 | 1.24 | 1.55 | 8.23  | 0.96 | 77.5 | -1.47 Texas          |
| 40 | 0.60 | 0.76 | 6.61  | 0.40 | 78.8 | -0.70 Utah           |
| 41 | 0.19 | 0.24 | 10.36 | 0.21 | 79.1 | -0.23 Vermont        |
| 42 | 0.62 | 0.78 | 9.16  | 0.58 | 78.5 | -0.76 Virginia       |
| 43 | 0.45 | 0.57 | 8.39  | 0.45 | 79.5 | -0.63 Washington     |
| 44 | 0.67 | 0.83 | 14.10 | 0.73 | 74.6 | -0.59 West Virgini   |
| 45 | 0.84 | 1.05 | 10.44 | 0.89 | 78.4 | -0.99 Wisconsin      |
| 46 |      |      |       |      |      |                      |
| 47 |      |      |       |      |      |                      |
| 48 |      |      |       |      |      |                      |
| 49 |      |      |       |      |      |                      |
| 50 |      |      |       |      |      |                      |
| 51 |      |      |       |      |      |                      |
| 52 |      |      |       |      |      |                      |
| 53 |      |      |       |      |      |                      |
| 54 |      |      |       |      |      |                      |
| 55 |      |      |       |      |      |                      |
| 56 |      |      |       |      |      |                      |
| 57 |      |      |       |      |      |                      |
| 58 |      |      |       |      |      |                      |
| 59 |      |      |       |      |      |                      |
| 60 |      |      |       |      |      |                      |

1  
2  
3 0.87 1.09 9.43 0.75 78.1 -0.98 Wyoming  
4  
5  
6  
7  
8  
9  
10  
11  
12  
13  
14  
15  
16  
17  
18  
19  
20  
21  
22  
23  
24  
25  
26  
27  
28  
29  
30  
31  
32  
33  
34  
35  
36  
37  
38  
39  
40  
41  
42  
43  
44  
45  
46  
47  
48  
49  
50  
51  
52  
53  
54  
55  
56  
57  
58  
59  
60

For peer review only

1  
2  
3  
4  
5  
6  
7  
8  
9  
10  
11  
12  
13  
14  
15  
16  
17  
18  
19  
20  
21  
22  
23  
24  
25  
26  
27  
28  
29  
30  
31  
32  
33  
34  
35  
36  
37  
38  
39  
40  
41  
42  
43  
44  
45  
46  
47  
48  
49  
50  
51  
52  
53  
54  
55  
56  
57  
58  
59  
60

Barbuda

national State of)  
Herzegovina

Islands  
Maldives

Islands  
Canton of Macau

Islands

Hong Kong SAR  
Special Administrative Region of China

For peer review only

1  
2  
3  
4  
5  
6  
7  
8  
9  
10  
11  
12  
13  
14  
15  
16  
17  
18  
19  
20  
21  
22  
23  
24  
25  
26  
27  
28  
29  
30  
31  
32  
33  
34  
35  
36  
37  
38  
39  
40  
41  
42  
43  
44  
45  
46  
47  
48  
49  
50  
51  
52  
53  
54  
55  
56  
57  
58  
59  
60

Republic of the Congo

Republic

Ghana

India

Italy

Republic of)

For peer review only

1  
2  
3  
4  
5  
6  
7  
8  
9  
10  
11  
12  
13  
14  
15  
16  
17  
18  
19  
20  
21  
22  
23  
24  
25  
26  
27  
28  
29  
30  
31  
32  
33  
34  
35  
36  
37  
38  
39  
40  
41  
42  
43  
44  
45  
46  
47  
48  
49  
50  
51  
52  
53  
54  
55  
56  
57  
58  
59  
60

For peer review only

r

try)

:

l

lonia  
rianas

1  
2  
3  
4  
5  
6  
7  
8  
9  
10  
11  
12  
13  
14  
15  
16  
17  
18  
19  
20  
21  
22  
23  
24  
25  
26  
27  
28  
29  
30  
31  
32  
33  
34  
35  
36  
37  
38  
39  
40  
41  
42  
43  
44  
45  
46  
47  
48  
49  
50  
51  
52  
53  
54  
55  
56  
57  
58  
59  
60

orea  
Moldova

eration

(French part)

id Principe

an (Dutch part)

stine

Republic

Tobago

1  
2  
3  
4  
5  
6  
7  
8  
9  
10  
11  
12  
13  
14  
15  
16  
17  
18  
19  
20  
21  
22  
23  
24  
25  
26  
27  
28  
29  
30  
31  
32  
33  
34  
35  
36  
37  
38  
39  
40  
41  
42  
43  
44  
45  
46  
47  
48  
49  
50  
51  
52  
53  
54  
55  
56  
57  
58  
59  
60

icos Islands  
  
Emirates  
om  
blic of Tanzania  
s of America  
s Virgin Islands

olivarian Republic of)

IR)

ral  
o

do Sul  
;

o  
lo Norte  
lo Sul

ra

For peer review only

1  
2  
3  
4  
5  
6  
7  
8  
9  
10  
11  
12  
13  
14  
15  
16  
17  
18  
19  
20  
21  
22  
23  
24  
25  
26  
27  
28  
29  
30  
31  
32  
33  
34  
35  
36  
37  
38  
39  
40  
41  
42  
43  
44  
45  
46  
47  
48  
49  
50  
51  
52  
53  
54  
55  
56  
57  
58  
59  
60

lia

vincia autonoma di)

gna  
a Giulia

ncia autonoma di)



1  
2  
3  
4  
5  
6  
7  
8  
9  
10  
11  
12  
13  
14  
15  
16  
17  
18  
19  
20  
21  
22  
23  
24  
25  
26  
27  
28  
29  
30  
31  
32  
33  
34  
35  
36  
37  
38  
39  
40  
41  
42  
43  
44  
45  
46  
47  
48  
49  
50  
51  
52  
53  
54  
55  
56  
57  
58  
59  
60

Vallee d'Aoste

es  
ia  
ia Sur

exico  
zaragoza

e)  
e Ocampo

o  
osi

Ignacio de la Llave

'E)

For peer review only

1  
2  
3  
4  
5  
6  
7  
8  
9  
10  
11  
12  
13  
14  
15  
16  
17  
18  
19  
20  
21  
22  
23  
24  
25  
26  
27  
28  
29  
30  
31  
32  
33  
34  
35  
36  
37  
38  
39  
40  
41  
42  
43  
44  
45  
46  
47  
48  
49  
50  
51  
52  
53  
54  
55  
56  
57  
58  
59  
60

js

icipado de)  
i)

n  
lancha

alenciana

unidad de)

on de)  
oral de)

1  
2  
3  
4  
5  
6  
7  
8  
9  
10  
11  
12  
13  
14  
15  
16  
17  
18  
19  
20  
21  
22  
23  
24  
25  
26  
27  
28  
29  
30  
31  
32  
33  
34  
35  
36  
37  
38  
39  
40  
41  
42  
43  
44  
45  
46  
47  
48  
49  
50  
51  
52  
53  
54  
55  
56  
57  
58  
59  
60

lumbia

λ)

.ts

hire

la  
l

la  
l

a

For peer review only
