# Supplementary material for: Beyond deaths per capita: comparative COVID-19 mortality indicators
Source: PubMed Central journal article supplement — BMJ Open. 2021 Mar 10;11(3):e042934. doi: 10.1136/bmjopen-2020-042934 (PMC7948156; doi:10.1136/bmjopen-2020-042934), 2021-03-10
Supplement: bmjopen-2020-042934supp003.pdf [file bmjopen-2020-042934supp003.pdf]

## Beyond Deaths per Capita: Comparative CoViD-19 Mortality Indicators Supplementary Information: An Example Brazil), part B

Patrick Heuveline, Ph.D. and Michael Tzen, M.S.  
California Center for Population Research (CCPR)  
University of California, Los Angeles (UCLA)

This file and associated Word document illustrate the calculations of the indicators for Brazil based on 1/1/2021 data updates

### Fixed demographic parameters (Part B in Technical Appendix)

#### Section 1 Mid-2020 Population Size

- 1.1 From the source <https://population.un.org/wpp/Download/Standard/CSV/>  
Get the file for Total Population, All variants  
Keep the estimates for 2020, medium variant, all countries

Example For Brazil, 1 number (in thousands)

Total population, 2020 212559.409

- 1.2 From the source <https://www.who.int/emergencies/diseases/novel-coronavirus-2019/situation-reports/>  
Determine date of first CoViD-19 death for UN countries and territories

Example For Brazil, 1 date (month/day/year)

Date of first death 3 17 2020

- 1.3 From the source <https://population.un.org/wpp/Download/Standard/CSV/>  
Get the file for Population by Age and Sex, Medium variant, annual from 1950 to 2010  
Keep the estimates for 2020, all countries

Example For Brazil, 2 vectors

|               |          |          |          |          |          |          |          |          |
|---------------|----------|----------|----------|----------|----------|----------|----------|----------|
| Males, 2020   | 7404.646 | 7464.84  | 7623.386 | 8253.31  | 8685.557 | 8534.004 | 8571.684 | 8593.722 |
| Females, 2020 | 7070.447 | 7136.977 | 7319.056 | 7964.694 | 8466.492 | 8418.59  | 8576.223 | 8735.133 |

- 1.3.a From the source <https://population.un.org/wpp/Download/Standard/CSV/>  
Get the file for Population by Age and Sex, Medium variant, annual from 1950 to 2010  
Keep the estimates for 2020, all countries

Example For Brazil, 2 numbers

Male infants, 2020 1468.3

Female infants, 2020 1402.62

- 1.3.b Get children 1-4 from children 0-4 & infants

Example For Brazil, 2 numbers

Males 1-4, 2020 5936.346  
 Females 1-4, 2020 5667.827

1.3.c Get population 5-74 in 10-year age groups  
 Example For Brazil, 2 vectors

|                    |           |           |           |           |           |           |          |          |
|--------------------|-----------|-----------|-----------|-----------|-----------|-----------|----------|----------|
| Males 5-84, 2020   | 15088.226 | 16938.867 | 17105.688 | 16298.25  | 12892.572 | 9931.736  | 5745.946 | 2402.447 |
| Females 5-84, 2020 | 14456.033 | 16431.186 | 16994.813 | 16691.918 | 13731.053 | 11134.693 | 6992.176 | 3406.893 |

1.3.d Get population 85+  
 Example For Brazil, 2 numbers

|                   |          |
|-------------------|----------|
| Males 85+, 2020   | 627.405  |
| Females 85+, 2020 | 1214.414 |

Section 2 Calendar-Year-2020 Period Life Table Values

2.1 From the source <https://population.un.org/wpp/Download/Standard/CSV/>  
 Get the file for Life Table, Medium variant  
 Keep the estimates for lx & ex, periods 2015-20 & 2020-25, all countries

Example For Brazil, 8 vectors

|                      |          |           |           |           |           |           |           |           |
|----------------------|----------|-----------|-----------|-----------|-----------|-----------|-----------|-----------|
| lx, males, 2015-20   | 1.00E+05 | 98579.735 | 98335.619 | 98198.045 | 98026.349 | 97196.061 | 95892.45  | 94701.252 |
| lx, females, 2015-20 | 1.00E+05 | 98822.813 | 98621.471 | 98537.678 | 98404.742 | 98183.564 | 97899.232 | 97581.555 |
| lx, males, 2020-25   | 1.00E+05 | 98798.839 | 98588.303 | 98467.29  | 98313.245 | 97554.476 | 96344.713 | 95227.117 |
| lx, females, 2020-25 | 1.00E+05 | 98997.945 | 98823.323 | 98749.266 | 98629.531 | 98426.818 | 98162.535 | 97864.354 |
| ex, males, 2015-20   | 71.899   | 71.9336   | 68.1082   | 63.2001   | 58.3064   | 53.7796   | 49.4757   | 45.0666   |
| ex, females, 2015-20 | 79.272   | 79.2152   | 75.3739   | 70.4359   | 65.5276   | 60.6693   | 55.838    | 51.0113   |
| ex, males, 2020-25   | 73.012   | 72.8987   | 69.0509   | 64.1327   | 59.2293   | 54.6672   | 50.3212   | 45.8825   |
| ex, females, 2020-25 | 80.1448  | 79.9552   | 76.0938   | 71.149    | 66.2324   | 61.3633   | 56.5215   | 51.6858   |

2.1.a Get npx from lx  
 Example For Brazil, 4 vectors (10 values for x=0, 1, 5, 15, 25, 35, 45, 55, 65 & 75)

|                       |          |          |          |          |          |          |          |          |
|-----------------------|----------|----------|----------|----------|----------|----------|----------|----------|
| npx, males, 2015-20   | 9.86E-01 | 9.98E-01 | 9.97E-01 | 9.78E-01 | 9.74E-01 | 9.64E-01 | 9.33E-01 | 8.68E-01 |
| npx, females, 2015-20 | 9.88E-01 | 9.98E-01 | 9.98E-01 | 9.95E-01 | 9.92E-01 | 9.84E-01 | 9.64E-01 | 9.22E-01 |
| npx, males, 2020-25   | 9.88E-01 | 9.98E-01 | 9.97E-01 | 9.80E-01 | 9.76E-01 | 9.66E-01 | 9.37E-01 | 8.76E-01 |
| npx, females, 2020-25 | 9.90E-01 | 9.98E-01 | 9.98E-01 | 9.95E-01 | 9.93E-01 | 9.85E-01 | 9.66E-01 | 9.27E-01 |

2.1.b Get npx for 2020 from npx for 2015-20 & npx for 2020-25  
 Example For Brazil, 2 vectors

|                    |          |          |          |          |          |          |          |          |
|--------------------|----------|----------|----------|----------|----------|----------|----------|----------|
| npx, males, 2020   | 9.87E-01 | 9.98E-01 | 9.97E-01 | 9.79E-01 | 9.75E-01 | 9.65E-01 | 9.35E-01 | 8.72E-01 |
| npx, females, 2020 | 9.89E-01 | 9.98E-01 | 9.98E-01 | 9.95E-01 | 9.92E-01 | 9.85E-01 | 9.65E-01 | 9.25E-01 |

## 2.2

## 2.2.a Get nmx from lx &amp; ex

Example For Brazil, 4 vectors (11 values for x=0, 1, 5, 15, 25, 35, 45, 55, 65, 75 & 85)

|                       |          |          |          |          |          |          |          |          |
|-----------------------|----------|----------|----------|----------|----------|----------|----------|----------|
| nmx, males, 2015-20   | 1.44E-02 | 6.20E-04 | 3.15E-04 | 2.20E-03 | 2.61E-03 | 3.71E-03 | 6.88E-03 | 1.41E-02 |
| nmx, females, 2015-20 | 1.19E-02 | 5.10E-04 | 2.20E-04 | 5.15E-04 | 7.90E-04 | 1.59E-03 | 3.65E-03 | 8.07E-03 |
| nmx, males, 2020-25   | 1.21E-02 | 5.33E-04 | 2.79E-04 | 2.02E-03 | 2.44E-03 | 3.48E-03 | 6.44E-03 | 1.31E-02 |
| nmx, females, 2020-25 | 1.01E-02 | 4.41E-04 | 1.96E-04 | 4.75E-04 | 7.42E-04 | 1.50E-03 | 3.43E-03 | 7.53E-03 |

## 2.2.b Get nmx for 2020 from nmx for 2015-20 &amp; nmx for 2020-25

Example For Brazil, 2 vectors

|                    |            |            |            |            |            |            |            |            |
|--------------------|------------|------------|------------|------------|------------|------------|------------|------------|
| nmx, males, 2020   | 0.01326754 | 0.00057671 | 0.00029717 | 0.00210824 | 0.00252603 | 0.00359544 | 0.00665761 | 0.01356478 |
| nmx, females, 2020 | 0.01100635 | 0.00047573 | 0.00020812 | 0.00049471 | 0.00076566 | 0.00154808 | 0.0035403  | 0.0078015  |

Updated Mortality Indicators (Part A in Technical Appendix)Section 1 *CCDR*1.1 From the source <https://coronavirus.jhu.edu/>

Get current estimate date & cumulative number of covid-19 deaths

Keep the estimates for all UN countries and territories

Example For Brazil, 1 number & 1 date (month/day/year)

|                  |          |
|------------------|----------|
| Death estimate   | 194949   |
| Date of estimate | 1 1 2021 |

For USA 1 number & 1 date (month/day/year)

|                  |          |
|------------------|----------|
| Death estimate   | 345737   |
| Date of estimate | 1 1 2021 |

## 1.2 From fixed demographic indicators

Get date of first CoViD-19 death and total mid-2020 population size for all locations in (1.1)

Example For Brazil, 1 number (in thousands) & 1 date (month/day/year)

|                        |            |
|------------------------|------------|
| Total population, 2020 | 212559.409 |
| Date of first death    | 3 17 2020  |

For USA, 1 number (in thousands) & 1 date (month/day/year)

|                        |            |
|------------------------|------------|
| Total population, 2020 | 331002.647 |
| Date of first death    | 3 2 2020   |

## 1.3 Calculate exposure in person-years for all locations in (1.1)

Example For Brazil, 1 number (in thousands)

Person-years 169002  
For USA, 1 number (in thousands)

Person-years 276740  
1.4 Calculate the estimated period Crude Covid-19 Death Rate (CCDR) for all locations in (1.1)

Example For Brazil, 1 number (in deaths per thousand person-years)  
CCDR 1.15352968

Section 2 CCMR  
2.1 From the source <https://data.cdc.gov/NCHS/Provisional-COVID-19-Death-Counts-by-Sex-Age-and-S/9bhg-hcku>  
Get report date and number of reported covid-19 deaths by sex and age group

Example 2 vectors & 1 date (month/day/year)

|                  |    |    |      |     |      |      |      |       |
|------------------|----|----|------|-----|------|------|------|-------|
| Male deaths      | 22 | 11 | 32   | 292 | 1332 | 3620 | 9748 | 23104 |
| Female deaths    | 10 | 8  | 19   | 191 | 755  | 1778 | 4746 | 12877 |
| Date of estimate | 12 | 30 | 2020 |     |      |      |      |       |

2.2 From fixed demographic indicators  
Get the mid-2020 population size by age groups for all locations in (1.1)

Example For Brazil, 2 vectors (in thousands)

|                           |         |          |           |           |           |           |           |           |
|---------------------------|---------|----------|-----------|-----------|-----------|-----------|-----------|-----------|
| Males by age group, 2020  | 1468.3  | 5936.346 | 15088.226 | 16938.867 | 17105.688 | 16298.25  | 12892.572 | 9931.736  |
| Females by age group, 202 | 1402.62 | 5667.827 | 14456.033 | 16431.186 | 16994.813 | 16691.918 | 13731.053 | 11134.693 |

For USA, 2 vectors (in thousands)

|                           |          |          |           |           |           |           |           |           |
|---------------------------|----------|----------|-----------|-----------|-----------|-----------|-----------|-----------|
| Males by age group, 2020  | 2039.37  | 8015.693 | 21023.906 | 22157.053 | 23846.969 | 20977.453 | 20288.634 | 20751.951 |
| Females by age group, 202 | 1951.448 | 7669.821 | 20110.733 | 21344.6   | 23040.84  | 20932.937 | 20342.971 | 21459.462 |

2.3 Calculate age-and-sex-specific covid-19 death rates for the USA

Example For USA, 2 vectors (in deaths per thousand person-years)

|              |            |            |            |            |            |            |            |            |
|--------------|------------|------------|------------|------------|------------|------------|------------|------------|
| Male rates   | 0.01478763 | 0.00188115 | 0.00208645 | 0.0180652  | 0.07656724 | 0.23655262 | 0.65861963 | 1.52616046 |
| Female rates | 0.00702449 | 0.0014298  | 0.00129508 | 0.01226641 | 0.04491802 | 0.11643232 | 0.31980504 | 0.82256044 |

2.4 Calculate estimated counterfactual numbers of covid-19 deaths for all locations in (1.1)

Example For Brazil, 2 vectors

|                            |            |            |            |            |            |            |            |            |
|----------------------------|------------|------------|------------|------------|------------|------------|------------|------------|
| Female deaths by age group | 17.2633594 | 8.8788082  | 25.029871  | 243.298299 | 1041.34693 | 3065.35408 | 6751.28026 | 12051.3935 |
| Male deaths by age group   | 7.83369941 | 6.44325327 | 14.8853377 | 160.250029 | 606.944377 | 1545.22488 | 3491.41165 | 7282.12236 |

2.5 Calculate the Comparative Covid-19 Mortality Ratio (CCMR) for estimated numbers of covid-19 deaths for all locations in (1.1)

Example For Brazil, 1 number (in deaths per thousand person-years)  
CCMR 1.56700864

Section 3 Estimated Reduction in 2020-Life Expectancies

## 3.1 From fixed demographic indicators

Get period life-table age-specific death rates (nmx) and survival probabilities (npx) for year-2020 for each country in (1.1)

Example For Brazil, 4 vectors

|                    |            |            |            |            |            |            |            |            |
|--------------------|------------|------------|------------|------------|------------|------------|------------|------------|
| npx, males, 2020   | 0.98689226 | 0.99769634 | 0.99703248 | 0.97910377 | 0.97504726 | 0.964638   | 0.93535103 | 0.87212003 |
| npx, females, 2020 | 0.9891034  | 0.99809934 | 0.9979207  | 0.99506403 | 0.99236928 | 0.98462455 | 0.96513929 | 0.92453186 |
| nmx, males, 2020   | 0.01326754 | 0.00057671 | 0.00029717 | 0.00210824 | 0.00252603 | 0.00359544 | 0.00665761 | 0.01356478 |
| nmx, females, 2020 | 0.01100635 | 0.00047573 | 0.00020812 | 0.00049471 | 0.00076566 | 0.00154808 | 0.0035403  | 0.0078015  |

## 3.2 Calculate the age-specific ratio of updated to previously projected deaths from all causes in 2020 for each country in (1.1)

Example For Brazil, 2 vectors

|              |            |            |            |            |            |            |            |            |
|--------------|------------|------------|------------|------------|------------|------------|------------|------------|
| nRx, males   | 1.00138135 | 1.00406304 | 1.0087466  | 1.01066705 | 1.03772699 | 1.0818541  | 1.12292859 | 1.13942177 |
| nRx, females | 1.00079169 | 1.00374383 | 1.00775227 | 1.03088616 | 1.07306933 | 1.09364783 | 1.11238789 | 1.1309569  |

## 3.3 Calculate age-specific survival probabilities in the new projected year-2020 life table for each country in (1.1)

Example For Brazil, 2 vectors

|               |            |            |            |            |            |            |            |            |
|---------------|------------|------------|------------|------------|------------|------------|------------|------------|
| *npx, males   | 0.98687427 | 0.99768699 | 0.99700656 | 0.97888324 | 0.97411816 | 0.96179945 | 0.92769792 | 0.85564043 |
| *npx, females | 0.98909482 | 0.99809223 | 0.9979046  | 0.99491197 | 0.991814   | 0.98319684 | 0.96129813 | 0.91508011 |

3.4 Calculate the age-specific number of years lived after age  $x$  for individuals dying in the age interval in the new projected year

Example For Brazil, 2 vectors

|               |            |            |            |            |            |            |            |            |
|---------------|------------|------------|------------|------------|------------|------------|------------|------------|
| *nax, males   | 0.08110658 | 1.60991325 | 5.28729479 | 5.77473421 | 5.11743064 | 5.33412189 | 5.50442983 | 5.48014364 |
| *nax, females | 0.08485635 | 1.49391652 | 5.57429439 | 5.43728791 | 5.56616648 | 5.5718189  | 5.59769645 | 5.65219385 |

3.5 Calculate new values of life expectancies ( $e_x^o$  values) in the year-2020 life table for all locations in (1.1)

Example For Brazil, 2 vectors

|             |            |            |            |            |            |            |            |            |
|-------------|------------|------------|------------|------------|------------|------------|------------|------------|
| ex, males   | 70.8076455 | 70.7483298 | 66.9086182 | 57.0936317 | 48.2006984 | 39.3453996 | 30.6962525 | 22.65963   |
| ex, females | 78.1103825 | 77.9706461 | 74.1168248 | 64.2607503 | 54.5615767 | 44.9659637 | 35.6392228 | 26.8486949 |

## 3.6 Calculate the difference between the new values of life expectancies in year-2020 life table and the original values

Example For Brazil, 3 vectors

|                        |            |            |            |            |            |            |            |            |
|------------------------|------------|------------|------------|------------|------------|------------|------------|------------|
| Diff in ex, males      | 1.64122072 | 1.66171283 | 1.66490029 | 1.66824885 | 1.69203454 | 1.69313261 | 1.65089297 | 1.5415536  |
| Diff in ex, females    | 1.59375157 | 1.61062505 | 1.61314637 | 1.61539917 | 1.61437525 | 1.59913747 | 1.56596075 | 1.4978324  |
| Diff in ex, both sexes | 1.61806504 | 1.63679196 | 1.63965448 | 1.64246852 | 1.65415196 | 1.64728132 | 1.60946262 | 1.52022618 |

|          |          |          |          |          |          |          |          |         |         |
|----------|----------|----------|----------|----------|----------|----------|----------|---------|---------|
| 7704.528 | 6721.639 | 6170.933 | 5508.456 | 4423.28  | 3394.482 | 2351.464 | 1480.939 | 921.508 | 423.007 |
| 7956.785 | 7079.054 | 6651.999 | 6089.814 | 5044.879 | 4034.221 | 2957.955 | 2011.193 | 1395.7  | 752.233 |

|           |           |           |           |           |           |           |           |           |           |
|-----------|-----------|-----------|-----------|-----------|-----------|-----------|-----------|-----------|-----------|
| 93421.833 | 91887.99  | 90018.099 | 87486.788 | 84010.341 | 79319.932 | 72901.013 | 64131.683 | 53579.501 | 40657.012 |
| 97128.793 | 96489.731 | 95591.475 | 94181.698 | 92153.999 | 89297.819 | 84964.87  | 78829.755 | 70191.912 | 58246.853 |
| 94018.919 | 92566.322 | 90795.125 | 88400.322 | 85115.544 | 80684.01  | 74603.737 | 66238.802 | 56043.892 | 43307.648 |
| 97436.95  | 96832.354 | 95982.892 | 94652.211 | 92742.5   | 90056.543 | 85979.982 | 80186.326 | 71961.344 | 60423.493 |
| 40.6489   | 36.2843   | 31.9839   | 27.8333   | 23.8762   | 20.1327   | 16.6737   | 13.5976   | 10.7666   | 8.3748    |
| 46.2368   | 41.5255   | 36.8907   | 32.4029   | 28.0576   | 23.87     | 19.9517   | 16.2986   | 12.9793   | 10.1045   |
| 41.4392   | 37.0491   | 32.721    | 28.5362   | 24.536    | 20.7393   | 17.2149   | 14.0595   | 11.1458   | 8.6677    |
| 46.9009   | 42.1773   | 37.527    | 33.017    | 28.6424   | 24.4174   | 20.4489   | 16.7351   | 13.3455   | 10.3928   |

|          |          |
|----------|----------|
| 7.35E-01 | 4.99E-01 |
| 8.26E-01 | 6.17E-01 |
| 7.51E-01 | 5.21E-01 |
| 8.37E-01 | 6.35E-01 |

|          |          |
|----------|----------|
| 7.43E-01 | 5.10E-01 |
| 8.32E-01 | 6.26E-01 |

|          |          |            |
|----------|----------|------------|
| 3.03E-02 | 6.63E-02 | 0.15550407 |
| 1.88E-02 | 4.66E-02 | 0.12978754 |
| 2.81E-02 | 6.23E-02 | 0.1505752  |
| 1.76E-02 | 4.39E-02 | 0.12634398 |

|            |            |            |
|------------|------------|------------|
| 0.02919471 | 0.06428998 | 0.15303963 |
| 0.01820512 | 0.04522272 | 0.12806576 |

|       |       |       |
|-------|-------|-------|
| 39437 | 46138 | 39811 |
| 24917 | 36506 | 56317 |

|          |          |          |
|----------|----------|----------|
| 5745.946 | 2402.447 | 627.405  |
| 6992.176 | 3406.893 | 1214.414 |

|           |          |          |
|-----------|----------|----------|
| 15110.793 | 7132.609 | 2441.585 |
| 17063.097 | 9056.327 | 4244.395 |

|            |            |            |
|------------|------------|------------|
| 3.57757354 | 8.86711422 | 22.3513209 |
| 2.00175005 | 5.52565937 | 18.1884493 |

|            |            |            |
|------------|------------|------------|
| 16344.1377 | 16937.4498 | 11149.6972 |
| 11128.4352 | 14967.6806 | 17562.0149 |

in (1.1)

0.7430472 0.51010334  
0.83152401 0.62587533  
0.02919471 0.06428998 0.15303963  
0.01820512 0.04522272 0.12806576

1.15090904 1.16746247 1.1709303  
1.13600533 1.14950624 1.1679704

0.7104796 0.45572398  
0.81091875 0.58352773  
r-2020 life table for each country in (1.1)

5.23508467 4.89517641 5.58039632  
5.51992621 5.23312565 6.68551905

15.558071 9.76468738 5.58039632  
18.8157407 11.9159148 6.68551905

1.38206161 1.18856733 0.95385881  
1.38149726 1.24416135 1.12296928  
1.38178632 1.21568636 1.03635172

|         |        |        |
|---------|--------|--------|
| 161.001 | 37.722 | 5.675  |
| 349.826 | 96.88  | 15.475 |

|           |           |           |          |
|-----------|-----------|-----------|----------|
| 26752.433 | 14359.584 | 5872.788  | 1613.615 |
| 43309.775 | 27310.5   | 13632.434 | 4476.96  |
| 29206.533 | 16167.993 | 6847.801  | 1951.199 |
| 45685.258 | 29447.489 | 15089.164 | 5098.862 |
| 6.4307    | 4.9084    | 3.6986    | 2.8377   |
| 7.7049    | 5.7626    | 4.1402    | 3.04     |
| 6.6412    | 5.047     | 3.7801    | 2.8715   |
| 7.9149    | 5.9015    | 4.223     | 3.0747   |
