# Supplementary material for: Beyond deaths per capita: comparative COVID-19 mortality indicators
Source: PubMed Central journal article supplement — BMJ Open. 2021 Mar 10;11(3):e042934. doi: 10.1136/bmjopen-2020-042934 (PMC7948156; doi:10.1136/bmjopen-2020-042934), 2021-03-10
Supplement: bmjopen-2020-042934supp004.pdf [file bmjopen-2020-042934supp004.pdf]

**Beyond Deaths per Capita: Comparative CoViD-19 Mortality Indicators****Supplementary Information: Sensitivity Analysis**

Patrick Heuveline, Ph.D. and Michael Tzen, M.S.

California Center for Population Research (CCPR)

University of California, Los Angeles (UCLA)

This file illustrates alternate calculations of life expectancy reduction using the actual age distribution for Brazil (from 12/31/2020) and 1/1

Age distribution of CoViD-19 deaths in Brazil1.1 From the source <https://transparencia.registrocivil.org.br/especial-covid>

For Brazil, 3 vectors

|                |     |     |     |      |      |       |       |       |
|----------------|-----|-----|-----|------|------|-------|-------|-------|
| Male deaths    | 158 | 641 | 971 | 3316 | 7474 | 14634 | 25672 | 28900 |
| Female deaths  | 154 | 536 | 849 | 2245 | 4453 | 8813  | 16502 | 20343 |
| Unknown deaths | 1   | 39  | 1   | 0    | 5    | 3     | 4     | 10    |

1.2 From the source <https://coronavirus.jhu.edu/>

Get current estimate date &amp; cumulative number of covid-19 deaths

Example For Brazil, 1 number &amp; 1 date (month/day/year)

|                  |        |   |      |
|------------------|--------|---|------|
| Death estimate   | 194949 |   |      |
| Date of estimate | 1      | 1 | 2021 |

1.3 Prorate to the current estimate for males and females

For Brazil, 2 vectors

|               |     |     |     |      |      |       |       |       |
|---------------|-----|-----|-----|------|------|-------|-------|-------|
| Male deaths   | 163 | 680 | 997 | 3403 | 7672 | 15018 | 26345 | 29660 |
| Female deaths | 159 | 568 | 872 | 2304 | 4571 | 9044  | 16934 | 20878 |

Directly standardized rate2.1 From the source <https://www.who.int/emergencies/diseases/novel-coronavirus-2019/situation-reports/>

Determine date of first CoViD-19 death for UN countries and territories

Example For Brazil, 1 date (month/day/year)

|                     |   |    |      |
|---------------------|---|----|------|
| Date of first death | 3 | 17 | 2020 |
|---------------------|---|----|------|

2.2 From the source <https://population.un.org/wpp/Download/Standard/CSV/>

Get the file for Population by Age and Sex, Medium variant, annual from 1950 to 2010

Keep the estimates for 2020, all countries

Example For Brazil, 2 vectors

|             |          |         |          |         |          |          |          |          |
|-------------|----------|---------|----------|---------|----------|----------|----------|----------|
| Males, 2020 | 7404.646 | 7464.84 | 7623.386 | 8253.31 | 8685.557 | 8534.004 | 8571.684 | 8593.722 |
|-------------|----------|---------|----------|---------|----------|----------|----------|----------|

|               |                    |           |           |           |           |           |           |           |
|---------------|--------------------|-----------|-----------|-----------|-----------|-----------|-----------|-----------|
| Females, 2020 | 7070.447           | 7136.977  | 7319.056  | 7964.694  | 8466.492  | 8418.59   | 8576.223  | 8735.133  |
| Example       | For USA, 2 vectors |           |           |           |           |           |           |           |
| Males, 2020   | 10055.063          | 10246.393 | 10777.513 | 10834.321 | 11322.732 | 12144.455 | 11702.514 | 10858.871 |
| Females, 2020 | 9621.269           | 9798.759  | 10311.974 | 10408.587 | 10936.013 | 11690.875 | 11349.965 | 10756.92  |

### 2.3 Get population by age and sex with same age-groups as Covid-19 deaths from Brazil

|               |                       |           |           |           |           |           |          |           |
|---------------|-----------------------|-----------|-----------|-----------|-----------|-----------|----------|-----------|
| Example       | For Brazil, 2 vectors |           |           |           |           |           |          |           |
| Males, 2020   | 14869.486             | 15876.696 | 17219.561 | 17165.406 | 14426.167 | 11679.389 | 7817.762 | 3832.403  |
| Females, 2020 | 14207.424             | 15283.75  | 16885.082 | 17311.356 | 15035.839 | 12741.813 | 9079.1   | 4969.148  |
|               | For USA, 2 vectors    |           |           |           |           |           |          |           |
| Males, 2020   | 20301.456             | 21611.834 | 23467.187 | 22561.385 | 20087.681 | 21021.6   | 18515.16 | 10972.505 |
| Females, 2020 | 19420.028             | 20720.561 | 22626.888 | 22106.885 | 20260.716 | 21098.477 | 19973.01 | 13110.092 |

### 2.4 Get sex- and age-specific rates of death from Covid-19 in Brazil

|               |                       |            |            |            |            |            |            |            |
|---------------|-----------------------|------------|------------|------------|------------|------------|------------|------------|
| Example       | For Brazil, 2 vectors |            |            |            |            |            |            |            |
| Males, 2020   | 0.01093808            | 0.04280015 | 0.05789299 | 0.19822148 | 0.53183196 | 1.28584541 | 3.36983562 | 7.73936137 |
| Females, 2020 | 0.01115798            | 0.03717768 | 0.05162182 | 0.13306858 | 0.30401662 | 0.70980389 | 1.86519929 | 4.20156921 |

### 2.5 Multiply sex- and age-specific rates of death from Covid-19 in Brazil by proportion in sex- and age-group in USA

|               |            |            |            |            |            |            |            |            |
|---------------|------------|------------|------------|------------|------------|------------|------------|------------|
| Example       |            |            |            |            |            |            |            |            |
| Males, 2020   | 0.00067087 | 0.00279451 | 0.00410446 | 0.01351092 | 0.03227548 | 0.08166257 | 0.18849712 | 0.25655439 |
| Females, 2020 | 0.00065464 | 0.0023273  | 0.0035288  | 0.00888734 | 0.0186089  | 0.04524369 | 0.11254787 | 0.16641244 |

### 2.6 Sum across all sex- and age-groups and multiply by one over fraction of year

|              |                      |  |  |  |  |  |  |  |
|--------------|----------------------|--|--|--|--|--|--|--|
| Example      | For Brazil, 1 number |  |  |  |  |  |  |  |
| <i>DSCDR</i> | 1.89262081           |  |  |  |  |  |  |  |

### Reduction in life expectancy at birth

#### 3.1 From the source <https://population.un.org/wpp/Download/Standard/CSV/>

Get the file for Life Table, Medium variant

Keep the estimates for lx & ex, periods 2015-20 & 2020-25, all countries

|                      |                       |           |           |           |           |           |           |           |
|----------------------|-----------------------|-----------|-----------|-----------|-----------|-----------|-----------|-----------|
| Example              | For Brazil, 8 vectors |           |           |           |           |           |           |           |
| lx, males, 2015-20   | 1.00E+05              | 98579.735 | 98335.619 | 98198.045 | 98026.349 | 97196.061 | 95892.45  | 94701.252 |
| lx, females, 2015-20 | 1.00E+05              | 98822.813 | 98621.471 | 98537.678 | 98404.742 | 98183.564 | 97899.232 | 97581.555 |
| lx, males, 2020-25   | 1.00E+05              | 98798.839 | 98588.303 | 98467.29  | 98313.245 | 97554.476 | 96344.713 | 95227.117 |
| lx, females, 2020-25 | 1.00E+05              | 98997.945 | 98823.323 | 98749.266 | 98629.531 | 98426.818 | 98162.535 | 97864.354 |
| ex, males, 2015-20   | 71.899                | 71.9336   | 68.1082   | 63.2001   | 58.3064   | 53.7796   | 49.4757   | 45.0666   |
| ex, females, 2015-20 | 79.272                | 79.2152   | 75.3739   | 70.4359   | 65.5276   | 60.6693   | 55.838    | 51.0113   |

|                      |         |         |         |         |         |         |         |         |
|----------------------|---------|---------|---------|---------|---------|---------|---------|---------|
| ex, males, 2020-25   | 73.012  | 72.8987 | 69.0509 | 64.1327 | 59.2293 | 54.6672 | 50.3212 | 45.8825 |
| ex, females, 2020-25 | 80.1448 | 79.9552 | 76.0938 | 71.149  | 66.2324 | 61.3633 | 56.5215 | 51.6858 |

### 3.2 Get npx from lx

Example For Brazil, 4 vectors (10 values for x=0, 10, 20, 30, 40, 50, 60, 70, 80 & 90)

|                       |          |          |          |          |          |          |          |          |
|-----------------------|----------|----------|----------|----------|----------|----------|----------|----------|
| npx, males, 2015-20   | 9.82E-01 | 9.90E-01 | 9.74E-01 | 9.70E-01 | 9.52E-01 | 9.07E-01 | 8.09E-01 | 6.34E-01 |
| npx, females, 2015-20 | 9.85E-01 | 9.96E-01 | 9.94E-01 | 9.89E-01 | 9.76E-01 | 9.48E-01 | 8.83E-01 | 7.39E-01 |
| npx, males, 2020-25   | 9.85E-01 | 9.91E-01 | 9.76E-01 | 9.72E-01 | 9.55E-01 | 9.13E-01 | 8.21E-01 | 6.54E-01 |
| npx, females, 2020-25 | 9.87E-01 | 9.97E-01 | 9.94E-01 | 9.89E-01 | 9.77E-01 | 9.51E-01 | 8.90E-01 | 7.54E-01 |

### 3.3 Get npx for 2020 from npx for 2015-20 & npx for 2020-25

Example For Brazil, 2 vectors

|                    |          |          |          |          |          |          |          |          |
|--------------------|----------|----------|----------|----------|----------|----------|----------|----------|
| npx, males, 2020   | 9.83E-01 | 9.90E-01 | 9.75E-01 | 9.71E-01 | 9.54E-01 | 9.10E-01 | 8.15E-01 | 6.44E-01 |
| npx, females, 2020 | 9.86E-01 | 9.97E-01 | 9.94E-01 | 9.89E-01 | 9.77E-01 | 9.50E-01 | 8.87E-01 | 7.46E-01 |

### 3.4 Get nmX from lx & ex

Example For Brazil, 4 vectors (10 values for x=0, 10, 20, 30, 40, 50, 60, 70, 80 & 90)

|                       |          |          |          |          |          |          |          |          |
|-----------------------|----------|----------|----------|----------|----------|----------|----------|----------|
| nmX, males, 2015-20   | 1.83E-03 | 1.02E-03 | 2.60E-03 | 3.01E-03 | 4.90E-03 | 9.74E-03 | 2.10E-02 | 4.42E-02 |
| nmX, females, 2015-20 | 1.48E-03 | 3.60E-04 | 6.15E-04 | 1.12E-03 | 2.42E-03 | 5.31E-03 | 1.24E-02 | 2.96E-02 |
| nmX, males, 2020-25   | 1.55E-03 | 9.30E-04 | 2.41E-03 | 2.83E-03 | 4.59E-03 | 9.09E-03 | 1.95E-02 | 4.13E-02 |
| nmX, females, 2020-25 | 1.27E-03 | 3.27E-04 | 5.73E-04 | 1.06E-03 | 2.27E-03 | 4.96E-03 | 1.15E-02 | 2.77E-02 |

### 3.5 Get nmX for 2020 from nmX for 2015-20 & nmX for 2020-25

Example For Brazil, 2 vectors

|                    |            |            |            |            |            |            |            |            |
|--------------------|------------|------------|------------|------------|------------|------------|------------|------------|
| nmX, males, 2020   | 0.0016929  | 0.00097656 | 0.00250775 | 0.00292208 | 0.00474457 | 0.00941498 | 0.02020965 | 0.04270665 |
| nmX, females, 2020 | 0.00137368 | 0.00034345 | 0.00059398 | 0.00109197 | 0.00234504 | 0.00513461 | 0.01193996 | 0.02862141 |

### 3.6 Calculate the age-specific ratio of updated to previously projected deaths from all causes in 2020

Example For Brazil, 2 vectors

|              |            |            |            |            |            |            |            |            |
|--------------|------------|------------|------------|------------|------------|------------|------------|------------|
| nRx, males   | 1.00645683 | 1.04381057 | 1.02306272 | 1.06775732 | 1.11188206 | 1.13606504 | 1.16540882 | 1.17815534 |
| nRx, females | 1.00811825 | 1.10823141 | 1.08688843 | 1.12180884 | 1.12952171 | 1.13795791 | 1.15547598 | 1.14513354 |

### 3.3 Calculate age-specific survival probabilities in the new projected year-2020 life table

Example For Brazil, 2 vectors

|               |            |            |            |            |            |            |            |            |
|---------------|------------|------------|------------|------------|------------|------------|------------|------------|
| *npx, males   | 0.983219   | 0.98983851 | 0.97467337 | 0.96925272 | 0.94848628 | 0.89803377 | 0.78756703 | 0.59523245 |
| *npx, females | 0.98632478 | 0.9962     | 0.99356399 | 0.98781731 | 0.97381497 | 0.94306847 | 0.87013866 | 0.71513706 |

### 3.4 Calculate the age-specific number of years lived after age x for individuals dying in the age interval in the new projected year

Example For Brazil, 2 vectors

|             |          |          |          |          |          |          |          |          |
|-------------|----------|----------|----------|----------|----------|----------|----------|----------|
| *nax, males | 9.76E-01 | 7.00E+00 | 4.93E+00 | 5.29E+00 | 5.48E+00 | 5.47E+00 | 5.44E+00 | 5.17E+00 |
|-------------|----------|----------|----------|----------|----------|----------|----------|----------|

\*nax, females                    8.24E-01    5.73E+00    5.24E+00    5.57E+00    5.72E+00    5.56E+00    5.55E+00    5.45E+00

3.5 Calculate new values of life expectancies ( $e_x^o$  values) in the year-2020 life table

Example    For Brazil, 2 vectors

ex, males                    70.6699538    61.859447    52.4226137    43.6566529    34.8737072    26.4700037    18.8541296    12.4735945

ex, females                    78.1512328    69.2233562    59.4655567    49.8168095    40.3625479    31.2941625    22.8475841    15.4298419

3.6 Calculate the difference between the new values of life expectancies in year-2020 life table and the original values

Example    For Brazil, 2 vectors

Diff in ex, males            1.77862005    1.80107639    1.79502682    1.81239945    1.78768793    1.70972343    1.57740644    1.35151234

Diff in ex, females            1.5526901    1.56534358    1.54703342    1.52808035    1.48525429    1.41231696    1.29293553    1.08442601

Diff in ex, both sexes        1.66841032    1.68608477    1.67405443    1.67370721    1.64015933    1.5646471    1.43864014    1.22122633

3.7 Difference with difference using CDC sex- and age-specific rates of death from Covid-19

Example    For Brazil, 3 numbers

Diff in diff in ex, males    0.13739933

Diff in diff in ex, females   -0.0410615

Diff in diff in ex, both sexe 0.05034528

3.8 Relative difference with difference using CDC sex- and age-specific rates of death from Covid-19

Example    For Brazil, 3 numbers

% diff in diff in ex, males    7.73%

% diff in diff in ex, female   -2.64%

% diff in diff in ex, both se    3.02%

/2021 data updates

|       |      |     |
|-------|------|-----|
| 21000 | 5673 | 256 |
| 19145 | 7687 | 495 |
| 7     | 3    | 0   |

|       |      |     |
|-------|------|-----|
| 21552 | 5822 | 263 |
| 19648 | 7889 | 508 |

|          |          |          |          |         |          |          |          |         |         |
|----------|----------|----------|----------|---------|----------|----------|----------|---------|---------|
| 7704.528 | 6721.639 | 6170.933 | 5508.456 | 4423.28 | 3394.482 | 2351.464 | 1480.939 | 921.508 | 423.007 |
|----------|----------|----------|----------|---------|----------|----------|----------|---------|---------|

|            |            |            |           |           |           |           |           |           |           |
|------------|------------|------------|-----------|-----------|-----------|-----------|-----------|-----------|-----------|
| 7956.785   | 7079.054   | 6651.999   | 6089.814  | 5044.879  | 4034.221  | 2957.955  | 2011.193  | 1395.7    | 752.233   |
| 10118.582  | 9969.099   | 10319.535  | 10702.065 | 10049.886 | 8465.274  | 6645.519  | 4326.986  | 2805.623  | 1538.659  |
| 10176.017  | 10084.699  | 10258.272  | 10840.205 | 10619.257 | 9353.753  | 7709.344  | 5400.748  | 3655.579  | 2372.445  |
| 1344.515   | 198.723    | 5.675      |           |           |           |           |           |           |           |
| 2147.933   | 446.706    | 15.475     |           |           |           |           |           |           |           |
| 4344.282   | 882.134    | 20.792     |           |           |           |           |           |           |           |
| 6028.024   | 1795.638   | 76.312     |           |           |           |           |           |           |           |
| 16.0294873 | 29.2989751 | 46.2875686 |           |           |           |           |           |           |           |
| 9.14746233 | 17.6613084 | 32.8219826 |           |           |           |           |           |           |           |
| 0.21038083 | 0.07808283 | 0.00290756 |           |           |           |           |           |           |           |
| 0.16658816 | 0.09580986 | 0.00756704 |           |           |           |           |           |           |           |
| 93421.833  | 91887.99   | 90018.099  | 87486.788 | 84010.341 | 79319.932 | 72901.013 | 64131.683 | 53579.501 | 40657.012 |
| 97128.793  | 96489.731  | 95591.475  | 94181.698 | 92153.999 | 89297.819 | 84964.87  | 78829.755 | 70191.912 | 58246.853 |
| 94018.919  | 92566.322  | 90795.125  | 88400.322 | 85115.544 | 80684.01  | 74603.737 | 66238.802 | 56043.892 | 43307.648 |
| 97436.95   | 96832.354  | 95982.892  | 94652.211 | 92742.5   | 90056.543 | 85979.982 | 80186.326 | 71961.344 | 60423.493 |
| 40.6489    | 36.2843    | 31.9839    | 27.8333   | 23.8762   | 20.1327   | 16.6737   | 13.5976   | 10.7666   | 8.3748    |
| 46.2368    | 41.5255    | 36.8907    | 32.4029   | 28.0576   | 23.87     | 19.9517   | 16.2986   | 12.9793   | 10.1045   |

|         |         |        |         |         |         |         |         |         |         |
|---------|---------|--------|---------|---------|---------|---------|---------|---------|---------|
| 41.4392 | 37.0491 | 32.721 | 28.5362 | 24.536  | 20.7393 | 17.2149 | 14.0595 | 11.1458 | 8.6677  |
| 46.9009 | 42.1773 | 37.527 | 33.017  | 28.6424 | 24.4174 | 20.4489 | 16.7351 | 13.3455 | 10.3928 |

|          |          |
|----------|----------|
| 3.53E-01 | 1.12E-01 |
| 4.69E-01 | 1.64E-01 |
| 3.73E-01 | 1.21E-01 |
| 4.87E-01 | 1.73E-01 |

|          |          |
|----------|----------|
| 3.63E-01 | 1.16E-01 |
| 4.78E-01 | 1.68E-01 |

|          |          |            |
|----------|----------|------------|
| 9.74E-02 | 1.93E-01 | 0.35239807 |
| 7.17E-02 | 1.59E-01 | 0.32894737 |
| 9.24E-02 | 1.87E-01 | 0.34825004 |
| 6.82E-02 | 1.54E-01 | 0.32523498 |

|            |            |            |
|------------|------------|------------|
| 0.0948876  | 0.19023682 | 0.35032406 |
| 0.06997506 | 0.15641075 | 0.32709118 |

|            |            |            |
|------------|------------|------------|
| 1.16258084 | 1.14240565 | 1.11378989 |
| 1.12710062 | 1.10591924 | 1.08734181 |

|            |            |
|------------|------------|
| 0.30797917 | 0.08573665 |
| 0.43521884 | 0.13951307 |

r-2020 life table for each country in (1.1)

|          |          |            |
|----------|----------|------------|
| 4.48E+00 | 3.31E+00 | 2.56287112 |
|----------|----------|------------|

4.93E+00 3.98E+00 2.81167477

7.44056406 4.10152939 2.56287112

9.40510835 5.21245068 2.81167477

1.07858502 0.87534353 0.29162883

0.84187688 0.61890552 0.24557677

0.96311764 0.75025182 0.26916441



161.001      37.722      5.675

|          |         |        |
|----------|---------|--------|
| 349.826  | 96.88   | 15.475 |
| 703.131  | 179.003 | 20.792 |
| 1348.005 | 447.633 | 76.312 |

|           |           |           |          |
|-----------|-----------|-----------|----------|
| 26752.433 | 14359.584 | 5872.788  | 1613.615 |
| 43309.775 | 27310.5   | 13632.434 | 4476.96  |
| 29206.533 | 16167.993 | 6847.801  | 1951.199 |
| 45685.258 | 29447.489 | 15089.164 | 5098.862 |
| 6.4307    | 4.9084    | 3.6986    | 2.8377   |
| 7.7049    | 5.7626    | 4.1402    | 3.04     |

|        |        |        |        |
|--------|--------|--------|--------|
| 6.6412 | 5.047  | 3.7801 | 2.8715 |
| 7.9149 | 5.9015 | 4.223  | 3.0747 |
