# Supplementary material for: Beyond deaths per capita: comparative COVID-19 mortality indicators
Source: PubMed Central journal article supplement — BMJ Open. 2021 Mar 10;11(3):e042934. doi: 10.1136/bmjopen-2020-042934 (PMC7948156; doi:10.1136/bmjopen-2020-042934), 2021-03-10
Supplement: bmjopen-2020-042934supp005.pdf [file bmjopen-2020-042934supp005.pdf]

| Location                                       | loc_type_fin | Pop_Mid2020   | Density_Mid | CDR_Yr_Last | Days_Est | CCDR_Est |
|------------------------------------------------|--------------|---------------|-------------|-------------|----------|----------|
| Afghanistan                                    | Cntry/Terr   | 38,928.341    | 59.6        | 6.52        | 286      | 0.07     |
| Albania                                        | Cntry/Terr   | 2,877.800     | 105.0       | 7.82        | 295      | 0.51     |
| Algeria                                        | Cntry/Terr   | 43,851.043    | 18.4        | 4.72        | 297      | 0.08     |
| Andorra                                        | Cntry/Terr   | 77.265        | 164.4       | NA          | 285      | 1.40     |
| Angola                                         | Cntry/Terr   | 32,866.268    | 26.4        | 8.33        | 277      | 0.02     |
| Antigua and Barbuda                            | Cntry/Terr   | 97.928        | 222.6       | 6.34        | 269      | 0.07     |
| Argentina                                      | Cntry/Terr   | 45,195.777    | 16.5        | 7.61        | 301      | 1.16     |
| Armenia                                        | Cntry/Terr   | 2,963.234     | 104.1       | 9.91        | 282      | 1.24     |
| Aruba                                          | Cntry/Terr   | 106.766       | 593.1       | 8.97        | 262      | 0.64     |
| Australia                                      | Cntry/Terr   | 25,499.881    | 3.3         | 6.60        | 307      | 0.04     |
| Austria                                        | Cntry/Terr   | 9,006.400     | 109.3       | 9.87        | 296      | 0.85     |
| Azerbaijan                                     | Cntry/Terr   | 10,139.175    | 122.7       | 6.75        | 290      | 0.33     |
| Bahamas                                        | Cntry/Terr   | 393.248       | 39.3        | 6.71        | 275      | 0.58     |
| Bahrain                                        | Cntry/Terr   | 1,701.583     | 2,238.9     | 2.38        | 293      | 0.26     |
| Bangladesh                                     | Cntry/Terr   | 164,689.383   | 1,265.2     | 5.55        | 289      | 0.06     |
| Barbados                                       | Cntry/Terr   | 287.371       | 668.3       | 8.98        | 271      | 0.03     |
| Belarus                                        | Cntry/Terr   | 9,449.321     | 46.6        | 12.55       | 276      | 0.20     |
| Belgium                                        | Cntry/Terr   | 11,589.616    | 382.7       | 9.79        | 293      | 2.10     |
| Belize                                         | Cntry/Terr   | 397.621       | 17.4        | 4.70        | 271      | 0.84     |
| Benin                                          | Cntry/Terr   | 12,123.198    | 107.5       | 8.96        | 271      | 0.00     |
| Bermuda                                        | Cntry/Terr   | 62.273        | 1,245.5     | NA          | 270      | 0.22     |
| Bolivia (Plurinational State of)               | Cntry/Terr   | 11,673.029    | 10.8        | 6.79        | 278      | 1.03     |
| Bosnia and Herzegovina                         | Cntry/Terr   | 3,280.815     | 64.3        | 10.61       | 287      | 1.57     |
| Botswana                                       | Cntry/Terr   | 2,351.625     | 4.1         | 5.80        | 276      | 0.02     |
| Brazil                                         | Cntry/Terr   | 212,559.409   | 25.4        | 6.42        | 291      | 1.15     |
| British Virgin Islands                         | Cntry/Terr   | 30.237        | 201.6       | NA          | 258      | 0.05     |
| Brunei Darussalam                              | Cntry/Terr   | 437.483       | 83.0        | 4.40        | 281      | 0.01     |
| Bulgaria                                       | Cntry/Terr   | 6,948.445     | 64.0        | 15.38       | 298      | 1.34     |
| Burkina Faso                                   | Cntry/Terr   | 20,903.278    | 76.4        | 8.27        | 290      | 0.01     |
| Burundi                                        | Cntry/Terr   | 11,890.781    | 463.0       | 8.04        | 258      | 0.00     |
| Cabo Verde                                     | Cntry/Terr   | 555.988       | 138.0       | 5.64        | 281      | 0.26     |
| Cameroon                                       | Cntry/Terr   | 26,545.864    | 56.2        | 9.36        | 284      | 0.02     |
| Canada                                         | Cntry/Terr   | 37,742.157    | 4.2         | 7.71        | 298      | 0.51     |
| Cayman Islands                                 | Cntry/Terr   | 65.720        | 273.8       | NA          | 293      | 0.04     |
| Central African Republic                       | Cntry/Terr   | 4,829.764     | 7.8         | 12.39       | 224      | 0.02     |
| Chad                                           | Cntry/Terr   | 16,425.859    | 13.0        | 12.24       | 249      | 0.01     |
| Channel Islands                                | Cntry/Terr   | 173.859       | 915.0       | 7.81        | 282      | 0.43     |
| Chile                                          | Cntry/Terr   | 19,116.209    | 25.7        | 6.12        | 287      | 1.11     |
| China                                          | Cntry/Terr   | 1,439,323.774 | 153.3       | 7.12        | 357      | 0.00     |
| China, Hong Kong Special Administrative Region | Cntry/Terr   | 7,496.988     | 7,140.0     | 6.61        | 326      | 0.02     |
| China, Taiwan                                  | Cntry/Terr   | 23,816.775    | 672.6       | 7.50        | 321      | 0.00     |
| Colombia                                       | Cntry/Terr   | 50,882.884    | 45.9        | 5.53        | 286      | 1.09     |

|               |            |               |       |       |     |      |
|---------------|------------|---------------|-------|-------|-----|------|
| Comoros       | Cntry/Terr | 869.595       | 467.3 | 7.27  | 244 | 0.02 |
| Congo         | Cntry/Terr | 5,518.092     | 16.2  | 6.75  | 276 | 0.03 |
| Costa Rica    | Cntry/Terr | 5,094.114     | 99.8  | 5.05  | 289 | 0.54 |
| Cote d'Ivoire | Cntry/Terr | 26,378.275    | 83.0  | 10.16 | 275 | 0.01 |
| Croatia       | Cntry/Terr | 4,105.268     | 73.4  | 13.13 | 284 | 1.23 |
| Cuba          | Cntry/Terr | 11,326.616    | 106.4 | 8.91  | 290 | 0.02 |
| Curacao       | Cntry/Terr | 164.100       | 369.6 | 8.77  | 287 | 0.11 |
| Cyprus        | Cntry/Terr | 1,207.361     | 130.7 | 6.99  | 290 | 0.12 |
| Czechia       | Cntry/Terr | 10,708.982    | 138.6 | 10.50 | 286 | 1.38 |
| Democratic R  | Cntry/Terr | 89,561.404    | 39.5  | 9.58  | 287 | 0.01 |
| Denmark       | Cntry/Terr | 5,792.203     | 136.5 | 9.72  | 293 | 0.28 |
| Djibouti      | Cntry/Terr | 988.002       | 42.6  | 7.08  | 268 | 0.08 |
| Dominican R   | Cntry/Terr | 10,847.904    | 224.5 | 6.13  | 292 | 0.28 |
| Ecuador       | Cntry/Terr | 17,643.060    | 71.0  | 5.10  | 293 | 0.99 |
| Egypt         | Cntry/Terr | 102,334.403   | 102.8 | 5.83  | 300 | 0.09 |
| El Salvador   | Cntry/Terr | 6,486.201     | 313.0 | 7.02  | 276 | 0.27 |
| Equatorial G  | Cntry/Terr | 1,402.985     | 50.0  | 9.43  | 256 | 0.09 |
| Estonia       | Cntry/Terr | 1,326.539     | 31.3  | 11.62 | 283 | 0.22 |
| Eswatini      | Cntry/Terr | 1,160.164     | 67.5  | 9.42  | 261 | 0.25 |
| Ethiopia      | Cntry/Terr | 114,963.583   | 115.0 | 6.66  | 272 | 0.02 |
| Finland       | Cntry/Terr | 5,540.718     | 18.2  | 9.73  | 287 | 0.13 |
| France        | Cntry/Terr | 65,273.512    | 119.2 | 9.27  | 322 | 1.13 |
| French Guian  | Cntry/Terr | 298.682       | 3.6   | 2.92  | 257 | 0.34 |
| Gabon         | Cntry/Terr | 2,225.728     | 8.6   | 6.91  | 288 | 0.04 |
| Gambia        | Cntry/Terr | 2,416.664     | 238.8 | 7.99  | 281 | 0.07 |
| Georgia       | Cntry/Terr | 3,989.175     | 57.4  | 12.85 | 273 | 0.84 |
| Germany       | Cntry/Terr | 83,783.945    | 240.4 | 11.16 | 299 | 0.49 |
| Ghana         | Cntry/Terr | 31,072.945    | 136.6 | 7.35  | 285 | 0.01 |
| Greece        | Cntry/Terr | 10,423.056    | 80.9  | 10.81 | 297 | 0.57 |
| Guadeloupe    | Cntry/Terr | 400.127       | 245.8 | 8.19  | 281 | 0.50 |
| Guam          | Cntry/Terr | 168.783       | 312.6 | 5.18  | 286 | 0.92 |
| Guatemala     | Cntry/Terr | 17,915.567    | 167.2 | 4.75  | 294 | 0.33 |
| Guinea        | Cntry/Terr | 13,132.792    | 53.4  | 8.54  | 262 | 0.01 |
| Guinea-Biss   | Cntry/Terr | 1,967.998     | 70.0  | 9.72  | 251 | 0.03 |
| Guyana        | Cntry/Terr | 786.559       | 4.0   | 7.42  | 296 | 0.26 |
| Haiti         | Cntry/Terr | 11,402.533    | 413.7 | 8.57  | 271 | 0.03 |
| Honduras      | Cntry/Terr | 9,904.608     | 88.5  | 4.44  | 282 | 0.41 |
| Hungary       | Cntry/Terr | 9,660.350     | 106.7 | 12.53 | 293 | 1.23 |
| Iceland       | Cntry/Terr | 341.250       | 3.4   | 6.70  | 288 | 0.11 |
| India         | Cntry/Terr | 1,380,004.385 | 464.1 | 7.24  | 296 | 0.13 |
| Indonesia     | Cntry/Terr | 273,523.621   | 151.0 | 6.45  | 298 | 0.10 |
| Iran (Islamic | Cntry/Terr | 83,992.953    | 51.6  | 4.88  | 318 | 0.76 |
| Iraq          | Cntry/Terr | 40,222.503    | 92.6  | 4.80  | 304 | 0.38 |

|               |            |             |          |       |     |      |
|---------------|------------|-------------|----------|-------|-----|------|
| Ireland       | Cntry/Terr | 4,937.796   | 71.7     | 6.05  | 297 | 0.56 |
| Isle of Man   | Cntry/Terr | 85.032      | 149.2    | NA    | 275 | 0.39 |
| Israel        | Cntry/Terr | 8,655.541   | 400.0    | 5.33  | 288 | 0.49 |
| Italy         | Cntry/Terr | 60,461.828  | 205.6    | 10.47 | 315 | 1.43 |
| Jamaica       | Cntry/Terr | 2,961.161   | 273.4    | 7.56  | 289 | 0.13 |
| Japan         | Cntry/Terr | 126,476.458 | 346.9    | 10.43 | 324 | 0.03 |
| Jordan        | Cntry/Terr | 10,203.140  | 114.9    | 3.86  | 281 | 0.49 |
| Kazakhstan    | Cntry/Terr | 18,776.707  | 7.0      | 7.13  | 281 | 0.19 |
| Kenya         | Cntry/Terr | 53,771.300  | 94.5     | 5.52  | 282 | 0.04 |
| Kuwait        | Cntry/Terr | 4,270.563   | 239.7    | 2.67  | 274 | 0.29 |
| Kyrgyzstan    | Cntry/Terr | 6,524.191   | 34.0     | 6.07  | 275 | 0.28 |
| Latvia        | Cntry/Terr | 1,886.202   | 30.3     | 14.60 | 274 | 0.45 |
| Lebanon       | Cntry/Terr | 6,825.442   | 667.2    | 4.31  | 298 | 0.26 |
| Liberia       | Cntry/Terr | 5,057.677   | 52.5     | 7.60  | 273 | 0.02 |
| Libya         | Cntry/Terr | 6,871.287   | 3.9      | 5.07  | 275 | 0.29 |
| Liechtensteir | Cntry/Terr | 38.137      | 238.4    | NA    | 273 | 1.37 |
| Lithuania     | Cntry/Terr | 2,722.291   | 43.4     | 13.56 | 288 | 0.68 |
| Luxembourg    | Cntry/Terr | 625.976     | 241.7    | 7.14  | 295 | 0.98 |
| Madagascar    | Cntry/Terr | 27,691.019  | 47.6     | 6.13  | 230 | 0.01 |
| Malawi        | Cntry/Terr | 19,129.955  | 202.9    | 6.77  | 270 | 0.01 |
| Malaysia      | Cntry/Terr | 32,365.998  | 98.5     | 5.05  | 290 | 0.02 |
| Maldives      | Cntry/Terr | 540.542     | 1,801.8  | 2.84  | 246 | 0.13 |
| Mali          | Cntry/Terr | 20,250.834  | 16.6     | 9.82  | 275 | 0.02 |
| Malta         | Cntry/Terr | 441.539     | 1,379.8  | 8.24  | 269 | 0.67 |
| Martinique    | Cntry/Terr | 375.265     | 354.0    | 9.07  | 283 | 0.14 |
| Mauritania    | Cntry/Terr | 4,649.660   | 4.5      | 7.27  | 274 | 0.10 |
| Mauritius     | Cntry/Terr | 1,271.767   | 626.5    | 8.30  | 284 | 0.01 |
| Mayotte       | Cntry/Terr | 272.813     | 727.5    | 2.69  | 276 | 0.27 |
| Mexico (Coul  | Cntry/Terr | 128,932.753 | 66.3     | 5.97  | 289 | 1.24 |
| Monaco        | Cntry/Terr | 39.244      | 26,338.3 | NA    | 261 | 0.11 |
| Montenegro    | Cntry/Terr | 628.062     | 46.7     | 10.70 | 283 | 1.40 |
| Montserrat    | Cntry/Terr | 4.999       | 50.0     | NA    | 252 | 0.29 |
| Morocco       | Cntry/Terr | 36,910.558  | 82.7     | 5.06  | 298 | 0.25 |
| Mozambique    | Cntry/Terr | 31,255.435  | 39.7     | 8.62  | 222 | 0.01 |
| Myanmar       | Cntry/Terr | 54,409.794  | 83.3     | 8.19  | 277 | 0.07 |
| Nepal         | Cntry/Terr | 29,136.808  | 203.3    | 6.39  | 231 | 0.10 |
| Netherlands   | Cntry/Terr | 17,134.873  | 508.2    | 8.72  | 302 | 0.82 |
| New Zealand   | Cntry/Terr | 4,822.233   | 18.3     | 6.98  | 280 | 0.01 |
| Nicaragua     | Cntry/Terr | 6,624.554   | 55.0     | 5.06  | 281 | 0.03 |
| Niger         | Cntry/Terr | 24,206.636  | 19.1     | 8.41  | 282 | 0.01 |
| Nigeria       | Cntry/Terr | 206,139.587 | 226.3    | 11.97 | 283 | 0.01 |
| North Macec   | Cntry/Terr | 2,083.380   | 82.6     | 10.02 | 286 | 1.54 |
| Northern Ma   | Cntry/Terr | 57.557      | 125.1    | NA    | 275 | 0.05 |

|               |            |             |         |       |     |      |
|---------------|------------|-------------|---------|-------|-----|------|
| Norway        | Cntry/Terr | 5,421.242   | 14.8    | 8.00  | 295 | 0.10 |
| Oman          | Cntry/Terr | 5,106.622   | 16.5    | 2.44  | 277 | 0.39 |
| Pakistan      | Cntry/Terr | 220,892.331 | 286.5   | 6.98  | 289 | 0.06 |
| Panama        | Cntry/Terr | 4,314.768   | 58.0    | 5.06  | 298 | 1.14 |
| Paraguay      | Cntry/Terr | 7,132.530   | 18.0    | 5.48  | 287 | 0.40 |
| Peru          | Cntry/Terr | 32,971.846  | 25.8    | 5.45  | 288 | 1.45 |
| Philippines   | Cntry/Terr | 109,581.085 | 367.5   | 5.83  | 336 | 0.09 |
| Poland        | Cntry/Terr | 37,846.605  | 123.6   | 10.09 | 296 | 0.93 |
| Portugal      | Cntry/Terr | 10,196.707  | 111.3   | 10.59 | 291 | 0.85 |
| Puerto Rico   | Cntry/Terr | 2,860.840   | 322.5   | 9.35  | 287 | 0.67 |
| Qatar         | Cntry/Terr | 2,881.060   | 248.2   | 1.19  | 280 | 0.11 |
| Republic of K | Cntry/Terr | 51,269.183  | 527.3   | 5.92  | 318 | 0.02 |
| Republic of P | Cntry/Terr | 4,033.963   | 122.8   | 11.62 | 288 | 0.94 |
| Reunion       | Cntry/Terr | 895.308     | 358.1   | 6.21  | 227 | 0.08 |
| Romania       | Cntry/Terr | 19,237.682  | 83.6    | 13.03 | 286 | 1.05 |
| Russian Fedε  | Cntry/Terr | 145,934.460 | 8.9     | 12.72 | 283 | 0.50 |
| Rwanda        | Cntry/Terr | 12,952.209  | 525.0   | 5.32  | 217 | 0.01 |
| Saint Martin  | Cntry/Terr | 38.659      | 729.4   | NA    | 278 | 0.41 |
| San Marino    | Cntry/Terr | 33.938      | 565.6   | NA    | 301 | 2.11 |
| Sao Tome ar   | Cntry/Terr | 219.161     | 228.3   | 4.87  | 247 | 0.11 |
| Saudi Arabia  | Cntry/Terr | 34,813.867  | 16.2    | 3.47  | 284 | 0.23 |
| Senegal       | Cntry/Terr | 16,743.930  | 87.0    | 5.81  | 276 | 0.03 |
| Serbia        | Cntry/Terr | 8,737.370   | 99.9    | 13.17 | 288 | 0.66 |
| Sierra Leone  | Cntry/Terr | 7,976.985   | 110.5   | 11.91 | 256 | 0.01 |
| Siint Maarte  | Cntry/Terr | 42.882      | 1,261.2 | NA    | 275 | 0.84 |
| Singapore     | Cntry/Terr | 5,850.343   | 8,357.6 | 4.45  | 287 | 0.01 |
| Slovakia      | Cntry/Terr | 5,459.643   | 113.5   | 9.87  | 271 | 0.53 |
| Slovenia      | Cntry/Terr | 2,078.932   | 103.2   | 9.94  | 291 | 1.63 |
| Somalia       | Cntry/Terr | 15,893.219  | 25.3    | 10.94 | 269 | 0.01 |
| South Africa  | Cntry/Terr | 59,308.690  | 48.9    | 9.52  | 281 | 0.63 |
| South Sudan   | Cntry/Terr | 11,193.729  | 18.3    | 10.56 | 233 | 0.01 |
| Spain         | Cntry/Terr | 46,754.783  | 93.7    | 9.02  | 304 | 1.31 |
| Sri Lanka     | Cntry/Terr | 21,413.250  | 341.5   | 6.62  | 279 | 0.01 |
| State of Pale | Cntry/Terr | 5,101.416   | 847.4   | 3.46  | 283 | 0.35 |
| Sudan         | Cntry/Terr | 43,849.269  | 24.8    | 7.24  | 293 | 0.04 |
| Suriname      | Cntry/Terr | 586.634     | 3.8     | 7.32  | 271 | 0.28 |
| Sweden        | Cntry/Terr | 10,099.270  | 24.6    | 9.19  | 293 | 1.08 |
| Switzerland   | Cntry/Terr | 8,654.618   | 219.0   | 8.01  | 303 | 1.07 |
| Syrian Arab F | Cntry/Terr | 17,500.657  | 95.3    | 5.52  | 279 | 0.05 |
| Tajikistan    | Cntry/Terr | 9,537.642   | 68.1    | 4.90  | 245 | 0.01 |
| Thailand      | Cntry/Terr | 69,799.978  | 136.6   | 7.61  | 307 | 0.00 |
| Togo          | Cntry/Terr | 8,278.737   | 152.2   | 8.56  | 279 | 0.01 |
| Trinidad and  | Cntry/Terr | 1,399.491   | 272.8   | 8.32  | 283 | 0.12 |

|               |            |             |       |       |     |      |
|---------------|------------|-------------|-------|-------|-----|------|
| Tunisia       | Cntry/Terr | 11,818.618  | 76.1  | 6.26  | 288 | 0.50 |
| Turkey        | Cntry/Terr | 84,339.067  | 109.6 | 5.40  | 290 | 0.31 |
| Turks and Ca  | Cntry/Terr | 38.718      | 40.8  | NA    | 272 | 0.21 |
| Ukraine       | Cntry/Terr | 43,733.759  | 75.5  | 15.19 | 295 | 0.55 |
| United Arab   | Cntry/Terr | 9,890.400   | 118.3 | 1.45  | 287 | 0.09 |
| United Kingd  | Cntry/Terr | 67,886.004  | 280.6 | 9.38  | 302 | 1.31 |
| United Repul  | Cntry/Terr | 59,734.213  | 67.4  | 6.50  | 277 | 0.00 |
| United State  | Cntry/Terr | 331,002.647 | 36.2  | 8.69  | 306 | 1.25 |
| United State  | Cntry/Terr | 104.423     | 298.4 | 8.47  | 271 | 0.30 |
| Uruguay       | Cntry/Terr | 3,473.727   | 19.8  | 9.47  | 277 | 0.07 |
| Uzbekistan    | Cntry/Terr | 33,469.199  | 78.7  | 5.77  | 281 | 0.02 |
| Venezuela (E  | Cntry/Terr | 28,435.943  | 32.2  | 6.95  | 280 | 0.05 |
| Yemen         | Cntry/Terr | 29,825.968  | 56.5  | 6.01  | 247 | 0.03 |
| Zambia        | Cntry/Terr | 18,383.956  | 24.7  | 6.58  | 275 | 0.03 |
| Zimbabwe      | Cntry/Terr | 14,862.927  | 38.4  | 8.07  | 285 | 0.03 |
| Acre          | Brazil     | 892.059     | 5.4   | NA    | 270 | 1.21 |
| Alagoas       | Brazil     | 3,375.667   | 121.2 | NA    | 277 | 0.97 |
| Amapa         | Brazil     | 855.439     | 6.0   | NA    | 273 | 1.45 |
| Amazonas (E   | Brazil     | 4,192.173   | 2.7   | NA    | 283 | 1.63 |
| Bahia         | Brazil     | 15,043.792  | 26.6  | NA    | 279 | 0.80 |
| Ceara         | Brazil     | 9,236.905   | 62.0  | NA    | 282 | 1.40 |
| Distrito Fede | Brazil     | 3,049.880   | 529.4 | NA    | 279 | 1.83 |
| Espirito Sant | Brazil     | 4,064.780   | 88.2  | NA    | 275 | 1.66 |
| Goias         | Brazil     | 7,098.918   | 20.9  | NA    | 282 | 1.24 |
| Maranhao      | Brazil     | 7,156.397   | 21.7  | NA    | 278 | 0.83 |
| Mato Grosso   | Brazil     | 3,524.464   | 3.9   | NA    | 274 | 1.69 |
| Mato Grosso   | Brazil     | 2,810.886   | 7.9   | NA    | 277 | 1.09 |
| Minas Gerai   | Brazil     | 21,411.788  | 36.5  | NA    | 278 | 0.73 |
| Para          | Brazil     | 8,701.617   | 7.0   | NA    | 276 | 1.10 |
| Paraiba       | Brazil     | 4,064.251   | 72.0  | NA    | 276 | 1.20 |
| Parana        | Brazil     | 11,565.208  | 58.0  | NA    | 281 | 0.90 |
| Pernambuco    | Brazil     | 9,666.777   | 98.6  | NA    | 283 | 1.29 |
| Piaui         | Brazil     | 3,310.800   | 13.2  | NA    | 269 | 1.17 |
| Rio de Janeir | Brazil     | 17,463.128  | 399.2 | NA    | 289 | 1.85 |
| Rio Grande c  | Brazil     | 3,547.108   | 67.2  | NA    | 279 | 1.11 |
| Rio Grande c  | Brazil     | 11,507.839  | 40.9  | NA    | 283 | 1.00 |
| Rondonia      | Brazil     | 1,797.626   | 7.6   | NA    | 268 | 1.38 |
| Roraima       | Brazil     | 612.715     | 2.7   | NA    | 273 | 1.71 |
| Santa Catari  | Brazil     | 7,247.033   | 75.7  | NA    | 282 | 0.94 |
| Sao Paulo     | Brazil     | 46,446.155  | 187.1 | NA    | 291 | 1.27 |
| Sergipe       | Brazil     | 2,325.083   | 106.0 | NA    | 275 | 1.42 |
| Tocantins     | Brazil     | 1,590.921   | 5.7   | NA    | 262 | 1.08 |
| Anhui         | China      | 65,274.199  | 467.2 | 5.96  | 326 | 0.00 |

|               |       |             |         |       |     |      |
|---------------|-------|-------------|---------|-------|-----|------|
| Beijing       | China | 22,086.180  | 1,314.7 | 5.58  | 326 | 0.00 |
| Chongqing     | China | 32,032.139  | 389.2   | 7.54  | 326 | 0.00 |
| Fujian        | China | 40,737.416  | 335.1   | 6.20  | 318 | 0.00 |
| Gansu         | China | 27,141.188  | 59.7    | 6.65  | 326 | 0.00 |
| Guangdong     | China | 118,131.330 | 656.3   | 4.55  | 326 | 0.00 |
| Guangxi       | China | 50,857.686  | 215.5   | 5.96  | 326 | 0.00 |
| Guizhou       | China | 37,148.668  | 211.1   | 6.85  | 326 | 0.00 |
| Hainan        | China | 9,689.620   | 285.0   | 6.01  | 326 | 0.00 |
| Hebei         | China | 77,845.071  | 414.7   | 6.38  | 344 | 0.00 |
| Heilongjiang  | China | 38,461.125  | 84.7    | 6.67  | 344 | 0.00 |
| Henan         | China | 98,844.373  | 591.9   | 6.80  | 326 | 0.00 |
| Hubei         | China | 60,772.884  | 326.9   | 7.00  | 357 | 0.08 |
| Hunan         | China | 70,934.167  | 337.8   | 7.08  | 326 | 0.00 |
| Inner Mongo   | China | 26,044.057  | 22.0    | 5.95  | 305 | 0.00 |
| Jiangxi       | China | 47,843.137  | 286.5   | 6.06  | 326 | 0.00 |
| Jilin         | China | 27,592.345  | 147.2   | 6.26  | 326 | 0.00 |
| Liaoning      | China | 44,623.518  | 305.9   | 7.39  | 324 | 0.00 |
| Shaanxi       | China | 39,619.778  | 192.7   | 6.24  | 318 | 0.00 |
| Shandong      | China | 103,253.406 | 671.3   | 7.18  | 326 | 0.00 |
| Shanghai      | China | 24,895.657  | 3,926.1 | 5.40  | 326 | 0.00 |
| Sichuan       | China | 85,873.613  | 177.1   | 7.01  | 326 | 0.00 |
| Tianjin       | China | 16,016.070  | 1,416.7 | 5.42  | 326 | 0.00 |
| Xinjiang      | China | 25,869.746  | 15.6    | 4.56  | 324 | 0.00 |
| Yunnan        | China | 49,811.822  | 126.4   | 6.32  | 318 | 0.00 |
| Zhejiang      | China | 59,983.359  | 588.1   | 5.58  | 317 | 0.00 |
| Abruzzo       | Italy | 1,314.662   | 121.5   | 11.20 | 298 | 1.13 |
| Basilicata    | Italy | 564.286     | 56.1    | 11.10 | 285 | 0.58 |
| Bolzano (Pro  | Italy | 531.191     | 71.8    | 8.30  | 296 | 1.72 |
| Calabria      | Italy | 1,949.987   | 128.1   | 10.10 | 293 | 0.30 |
| Campania      | Italy | 5,801.773   | 424.5   | 9.20  | 297 | 0.60 |
| Emilia-Roma   | Italy | 4,468.697   | 164.5   | 11.20 | 311 | 2.04 |
| Friuli-Venezi | Italy | 1,218.962   | 155.1   | 11.90 | 300 | 1.64 |
| Lazio         | Italy | 5,885.980   | 341.7   | 9.70  | 302 | 0.78 |
| Liguria       | Italy | 1,557.702   | 192.2   | 14.30 | 305 | 2.23 |
| Lombardia     | Italy | 10,073.686  | 422.2   | 9.90  | 315 | 2.90 |
| Marche        | Italy | 1,529.183   | 162.7   | 11.20 | 306 | 1.23 |
| Molise        | Italy | 306.556     | 68.8    | 12.10 | 292 | 0.78 |
| Piemonte      | Italy | 4,369.052   | 172.3   | 12.30 | 303 | 2.19 |
| Puglia        | Italy | 4,034.220   | 206.6   | 9.60  | 304 | 0.74 |
| Sardegna      | Italy | 1,643.577   | 68.2    | 9.90  | 293 | 0.57 |
| Sicilia       | Italy | 5,005.165   | 193.9   | 10.40 | 296 | 0.60 |
| Toscana       | Italy | 3,740.109   | 295.7   | 11.60 | 299 | 1.20 |
| Trento (Provi | Italy | 541.866     | 87.3    | 9.30  | 296 | 2.15 |

|                                 |        |            |         |       |     |      |
|---------------------------------|--------|------------|---------|-------|-----|------|
| Umbria                          | Italy  | 884.495    | 104.7   | 11.40 | 295 | 0.88 |
| Valle d'Aosta                   | Italy  | 125.953    | 38.7    | 11.70 | 297 | 3.71 |
| Veneto                          | Italy  | 4,914.725  | 267.2   | 10.00 | 313 | 1.56 |
| Aguascalientes                  | Mexico | 1,360.852  | 242.3   | 4.37  | 265 | 1.39 |
| Baja California                 | Mexico | 3,605.789  | 50.5    | 4.88  | 275 | 2.04 |
| Baja California                 | Mexico | 727.007    | 9.8     | 3.82  | 275 | 1.42 |
| Campeche                        | Mexico | 945.785    | 16.4    | 4.64  | 269 | 1.39 |
| Chiapas                         | Mexico | 5,412.679  | 73.8    | 4.53  | 266 | 0.31 |
| Chihuahua                       | Mexico | 3,832.828  | 15.5    | 7.58  | 267 | 1.58 |
| Ciudad de México                | Mexico | 10,298.920 | 6,888.8 | 6.23  | 289 | 2.06 |
| Coahuila de Zaragoza            | Mexico | 3,150.456  | 20.7    | 5.31  | 278 | 1.75 |
| Colima                          | Mexico | 749.741    | 133.2   | 4.95  | 260 | 1.50 |
| Durango                         | Mexico | 1,858.666  | 15.0    | 5.65  | 287 | 1.06 |
| Guanajuato                      | Mexico | 6,295.742  | 205.6   | 4.95  | 269 | 1.15 |
| Guerrero                        | Mexico | 3,882.954  | 61.1    | 4.86  | 274 | 0.93 |
| Hidalgo                         | Mexico | 3,072.136  | 147.6   | 4.87  | 279 | 1.46 |
| Jalisco                         | Mexico | 8,442.704  | 107.4   | 5.33  | 284 | 0.92 |
| Mexico (State)                  | Mexico | 17,378.187 | 777.5   | 4.50  | 277 | 1.44 |
| Michoacán de Ocampo             | Mexico | 4,992.690  | 85.1    | 5.55  | 280 | 0.72 |
| Morelos                         | Mexico | 2,047.959  | 419.8   | 5.49  | 278 | 0.93 |
| Nayarit                         | Mexico | 1,255.449  | 45.1    | 5.47  | 274 | 1.12 |
| Nuevo León                      | Mexico | 5,360.737  | 83.5    | 4.97  | 272 | 1.30 |
| Oaxaca                          | Mexico | 4,386.373  | 46.8    | 5.71  | 277 | 0.64 |
| Puebla                          | Mexico | 6,612.709  | 192.8   | 5.37  | 278 | 1.14 |
| Queretaro                       | Mexico | 2,094.397  | 179.0   | 4.36  | 277 | 1.19 |
| Quintana Roo                    | Mexico | 1,497.403  | 33.4    | 3.35  | 279 | 1.78 |
| San Luis Potosí                 | Mexico | 2,972.710  | 48.6    | 5.14  | 282 | 1.34 |
| Sinaloa                         | Mexico | 3,215.596  | 56.0    | 5.59  | 277 | 1.74 |
| Sonora                          | Mexico | 3,077.474  | 17.1    | 5.60  | 272 | 1.82 |
| Tabasco                         | Mexico | 2,555.914  | 103.3   | 4.98  | 275 | 1.67 |
| Tamaulipas                      | Mexico | 3,689.743  | 45.9    | 5.26  | 272 | 1.20 |
| Tlaxcala                        | Mexico | 1,345.008  | 336.5   | 4.73  | 266 | 1.45 |
| Veracruz de Ignacio de la Llave | Mexico | 8,831.401  | 122.9   | 5.90  | 277 | 0.95 |
| Yucatan                         | Mexico | 2,269.237  | 57.4    | 5.71  | 271 | 1.36 |
| Zacatecas                       | Mexico | 1,713.503  | 22.8    | 5.62  | 275 | 1.37 |
| Amazonas (Region)               | Peru   | 423.381    | 10.8    | NA    | 288 | 0.76 |
| Ancash                          | Peru   | 1,216.095  | 33.9    | NA    | 288 | 1.58 |
| Apurimac                        | Peru   | 453.951    | 21.7    | NA    | 288 | 0.45 |
| Arequipa                        | Peru   | 1,556.127  | 24.6    | NA    | 288 | 1.33 |
| Ayacucho                        | Peru   | 688.200    | 15.7    | NA    | 288 | 0.70 |
| Cajamarca                       | Peru   | 1,500.006  | 45.0    | NA    | 288 | 0.52 |
| Callao                          | Peru   | 1,119.096  | 7,669.8 | NA    | 288 | 2.25 |
| Cusco                           | Peru   | 1,350.177  | 18.8    | NA    | 288 | 0.50 |

|                |       |            |         |    |       |     |      |
|----------------|-------|------------|---------|----|-------|-----|------|
| Huancavelica   | Peru  | 387.386    | 17.5    | NA |       | 288 | 0.48 |
| Huanuco        | Peru  | 804.804    | 21.6    | NA |       | 288 | 0.78 |
| Ica            | Peru  | 954.364    | 44.7    | NA |       | 288 | 2.39 |
| Junin          | Peru  | 1,393.373  | 31.4    | NA |       | 288 | 0.88 |
| La Libertad    | Peru  | 1,990.970  | 78.1    | NA |       | 288 | 1.58 |
| Lambayeque     | Peru  | 1,340.725  | 92.6    | NA |       | 288 | 1.83 |
| Lima           | Peru  | 10,693.435 | 307.0   | NA |       | 288 | 1.99 |
| Loreto         | Peru  | 981.170    | 2.7     | NA |       | 288 | 1.30 |
| Madre de Dios  | Peru  | 158.084    | 1.9     | NA |       | 288 | 1.25 |
| Moquegua       | Peru  | 197.521    | 12.6    | NA |       | 288 | 1.99 |
| Pasco          | Peru  | 284.581    | 11.4    | NA |       | 288 | 0.61 |
| Piura          | Peru  | 2,076.318  | 58.2    | NA |       | 288 | 1.36 |
| Puno           | Peru  | 1,316.375  | 18.3    | NA |       | 288 | 0.39 |
| San Martin     | Peru  | 909.611    | 17.7    | NA |       | 288 | 1.11 |
| Tacna          | Peru  | 371.146    | 23.1    | NA |       | 288 | 0.92 |
| Tumbes         | Peru  | 252.031    | 54.0    | NA |       | 288 | 1.74 |
| Ucayali        | Peru  | 552.917    | 5.4     | NA |       | 288 | 0.91 |
| Andalucia      | Spain | 8,349.380  | 95.3    |    | 8.33  | 295 | 0.76 |
| Aragon         | Spain | 1,315.017  | 27.6    |    | 10.26 | 300 | 2.44 |
| Asturias (Prin | Spain | 1,024.060  | 96.6    |    | 12.64 | 297 | 1.62 |
| Balears (Illes | Spain | 1,137.723  | 227.9   |    | 6.70  | 297 | 0.51 |
| Canarias       | Spain | 2,136.113  | 286.8   |    | 7.05  | 295 | 0.24 |
| Cantabria      | Spain | 579.733    | 109.0   |    | 10.33 | 291 | 0.85 |
| Castilla y Lec | Spain | 2,401.521  | 25.5    |    | 11.91 | 295 | 2.62 |
| Castilla-La M  | Spain | 2,021.012  | 25.4    |    | 9.54  | 297 | 2.49 |
| Catalunia      | Spain | 7,623.414  | 237.4   |    | 8.41  | 300 | 1.40 |
| Ceuta          | Spain | 83.673     | 4,183.6 |    | 6.29  | 281 | 0.92 |
| Comunitat V    | Spain | 4,976.319  | 214.0   |    | 8.81  | 300 | 0.72 |
| Extremadura    | Spain | 1,063.076  | 25.5    |    | 10.56 | 298 | 1.23 |
| Galicia        | Spain | 2,697.559  | 91.2    |    | 11.57 | 294 | 0.64 |
| Madrid (Com    | Spain | 6,611.809  | 823.6   |    | 7.06  | 304 | 2.15 |
| Melilla        | Spain | 85.187     | 7,098.9 |    | 5.78  | 283 | 0.65 |
| Murcia (Regi   | Spain | 1,479.460  | 130.8   |    | 7.65  | 288 | 0.64 |
| Navarra (C. F  | Spain | 651.019    | 62.7    |    | 8.51  | 293 | 1.84 |
| Pais Vasco     | Spain | 2,202.966  | 304.5   |    | 9.89  | 304 | 1.62 |
| Rioja, La      | Spain | 315.741    | 62.6    |    | 10.00 | 299 | 2.27 |
| Alabama        | USA   | 4,944.686  | 37.6    |    | 10.92 | 282 | 1.27 |
| Alaska         | USA   | 745.469    | 0.5     |    | 5.96  | 273 | 0.37 |
| Arizona        | USA   | 7,262.286  | 24.7    |    | 8.23  | 286 | 1.56 |
| Arkansas       | USA   | 3,049.575  | 22.6    |    | 10.85 | 283 | 1.56 |
| California     | USA   | 40,011.015 | 99.0    |    | 6.78  | 297 | 0.80 |
| Colorado       | USA   | 5,762.204  | 21.4    |    | 6.79  | 290 | 1.05 |
| Connecticut    | USA   | 3,613.794  | 288.0   |    | 8.73  | 288 | 2.11 |



|                |     |            |         |       |     |      |
|----------------|-----|------------|---------|-------|-----|------|
| Delaware       | USA | 979.254    | 193.4   | 9.54  | 281 | 1.23 |
| District of Co | USA | 712.330    | 4,477.2 | 7.15  | 281 | 1.44 |
| Florida        | USA | 21,586.295 | 154.3   | 9.70  | 294 | 1.25 |
| Georgia (US)   | USA | 10,628.510 | 70.9    | 7.97  | 291 | 1.29 |
| Hawaii         | USA | 1,439.609  | 86.5    | 7.98  | 275 | 0.27 |
| Idaho          | USA | 1,774.655  | 8.3     | 8.16  | 281 | 1.05 |
| Illinois       | USA | 12,887.403 | 89.5    | 8.57  | 290 | 1.76 |
| Indiana        | USA | 6,767.587  | 72.8    | 9.84  | 290 | 1.54 |
| Iowa           | USA | 3,194.037  | 22.1    | 9.71  | 282 | 1.58 |
| Kansas         | USA | 2,945.539  | 13.9    | 9.29  | 282 | 1.21 |
| Kentucky       | USA | 4,519.893  | 43.9    | 10.82 | 287 | 0.74 |
| Louisiana      | USA | 4,713.234  | 41.8    | 9.78  | 293 | 1.98 |
| Maine          | USA | 1,355.887  | 17.0    | 10.99 | 280 | 0.33 |
| Maryland       | USA | 6,109.605  | 241.3   | 8.25  | 287 | 1.23 |
| Massachusetts  | USA | 6,985.561  | 344.1   | 8.57  | 287 | 2.27 |
| Michigan       | USA | 10,114.528 | 68.7    | 9.80  | 289 | 1.63 |
| Minnesota      | USA | 5,677.124  | 27.5    | 9.96  | 282 | 1.23 |
| Mississippi    | USA | 3,019.798  | 24.9    | 10.82 | 284 | 2.04 |
| Missouri       | USA | 6,200.300  | 34.7    | 10.12 | 288 | 1.17 |
| Montana        | USA | 1,076.137  | 2.9     | 9.71  | 279 | 1.17 |
| Nebraska       | USA | 1,952.141  | 9.8     | 8.79  | 279 | 1.11 |
| Nevada         | USA | 3,070.509  | 10.8    | 8.22  | 286 | 1.30 |
| New Hampshire  | USA | 1,372.567  | 59.1    | 9.31  | 275 | 0.74 |
| New Jersey     | USA | 9,008.043  | 468.8   | 8.31  | 292 | 2.65 |
| New Mexico     | USA | 2,121.624  | 6.7     | 8.94  | 278 | 1.54 |
| New York       | USA | 19,779.540 | 161.7   | 7.83  | 294 | 2.39 |
| North Carolina | USA | 10,501.123 | 83.2    | 9.07  | 282 | 0.83 |
| North Dakota   | USA | 769.967    | 4.3     | 8.49  | 277 | 2.22 |
| Ohio           | USA | 11,827.215 | 111.5   | 10.61 | 287 | 0.97 |
| Oklahoma       | USA | 3,989.492  | 22.4    | 10.29 | 285 | 0.80 |
| Oregon         | USA | 4,244.225  | 17.1    | 8.84  | 290 | 0.44 |
| Pennsylvania   | USA | 12,966.170 | 111.7   | 10.59 | 288 | 1.56 |
| Rhode Island   | USA | 1,070.329  | 395.5   | 9.59  | 279 | 2.18 |
| South Carolina | USA | 5,145.408  | 66.0    | 9.84  | 287 | 1.31 |
| South Dakota   | USA | 893.132    | 4.5     | 9.19  | 271 | 2.25 |
| Tennessee      | USA | 6,847.752  | 64.1    | 10.44 | 285 | 1.30 |
| Texas          | USA | 28,999.321 | 42.7    | 7.00  | 290 | 1.22 |
| Utah           | USA | 3,194.497  | 15.0    | 5.81  | 279 | 0.52 |
| Vermont        | USA | 634.325    | 26.5    | 9.63  | 287 | 0.27 |
| Virginia       | USA | 8,614.990  | 84.0    | 8.10  | 287 | 0.74 |
| Washington     | USA | 7,627.572  | 44.2    | 7.70  | 311 | 0.53 |
| West Virginia  | USA | 1,828.890  | 29.3    | 12.82 | 271 | 0.99 |
| Wisconsin      | USA | 5,882.866  | 41.8    | 9.09  | 288 | 1.13 |

---

|         |     |         |     |      |     |      |
|---------|-----|---------|-----|------|-----|------|
| Wyoming | USA | 584.633 | 2.3 | 8.23 | 256 | 1.07 |
|---------|-----|---------|-----|------|-----|------|

| CCMR_Est | ISCDR_Est | CDR_2020 | CCDR_2020 | e0_2020_B | e0_Diff_B | Location                               |
|----------|-----------|----------|-----------|-----------|-----------|----------------------------------------|
|          | 0.33      | 0.42     | 6.31      | 0.06      | 65.0      | -0.16 Afghanistan                      |
|          | 0.48      | 0.60     | 8.87      | 0.41      | 78.2      | -0.48 Albania                          |
|          | 0.14      | 0.18     | 4.92      | 0.06      | 76.9      | -0.16 Algeria                          |
| NA       | NA        | NA       | NA        | NA        | NA        | Andorra                                |
|          | 0.08      | 0.11     | 7.87      | 0.01      | 61.3      | -0.03 Angola                           |
|          | 0.10      | 0.12     | 6.65      | 0.05      | 77.0      | -0.09 Antigua and Barbuda              |
|          | 1.37      | 1.71     | 8.65      | 0.96      | 75.4      | -1.32 Argentina                        |
|          | 1.41      | 1.76     | 10.44     | 0.95      | 73.9      | -1.02 Armenia                          |
|          | 0.65      | 0.81     | 10.01     | 0.46      | 75.8      | -0.49 Aruba                            |
|          | 0.03      | 0.04     | 6.90      | 0.04      | 83.5      | -0.06 Australia                        |
|          | 0.56      | 0.70     | 10.66     | 0.69      | 80.9      | -0.72 Austria                          |
|          | 0.59      | 0.74     | 7.15      | 0.26      | 72.6      | -0.40 Azerbaijan                       |
|          | 0.95      | 1.19     | 7.53      | 0.43      | 73.2      | -0.69 Bahamas                          |
|          | 0.79      | 0.99     | 2.67      | 0.21      | 76.8      | -0.70 Bahrain                          |
|          | 0.12      | 0.16     | 5.68      | 0.05      | 72.8      | -0.11 Bangladesh                       |
|          | 0.02      | 0.03     | 9.23      | 0.02      | 79.2      | -0.03 Barbados                         |
|          | 0.18      | 0.22     | 12.81     | 0.15      | 74.4      | -0.13 Belarus                          |
|          | 1.37      | 1.72     | 11.60     | 1.68      | 80.0      | -1.72 Belgium                          |
|          | 1.89      | 2.37     | 5.56      | 0.62      | 73.1      | -1.71 Belize                           |
|          | 0.02      | 0.02     | 8.60      | 0.00      | 62.0      | -0.01 Benin                            |
| NA       | NA        | NA       | NA        | NA        | NA        | Bermuda                                |
|          | 1.72      | 2.15     | 7.72      | 0.79      | 70.1      | -1.66 Bolivia (Plurinational State of) |
|          | 1.31      | 1.64     | 12.34     | 1.23      | 76.3      | -1.13 Bosnia and Herzegovina           |
|          | 0.07      | 0.09     | 5.96      | 0.02      | 69.2      | -0.04 Botswana                         |
|          | 1.57      | 1.96     | 7.69      | 0.92      | 74.4      | -1.62 Brazil                           |
| NA       | NA        | NA       | NA        | NA        | NA        | British Virgin Islands                 |
|          | 0.02      | 0.02     | 4.76      | 0.01      | 76.0      | -0.02 Brunei Darussalam                |
|          | 0.93      | 1.16     | 16.63     | 1.09      | 74.4      | -0.71 Bulgaria                         |
|          | 0.03      | 0.03     | 7.78      | 0.00      | 61.8      | -0.01 Burkina Faso                     |
|          | 0.00      | 0.00     | 7.66      | 0.00      | 61.8      | 0.00 Burundi                           |
|          | 0.61      | 0.76     | 5.84      | 0.20      | 72.5      | -0.41 Cabo Verde                       |
|          | 0.10      | 0.12     | 8.97      | 0.02      | 59.5      | -0.04 Cameroon                         |
|          | 0.37      | 0.46     | 8.45      | 0.41      | 82.0      | -0.55 Canada                           |
| NA       | NA        | NA       | NA        | NA        | NA        | Cayman Islands                         |
|          | 0.10      | 0.12     | 11.82     | 0.01      | 53.4      | -0.02 Central African Republic         |
|          | 0.05      | 0.06     | 11.73     | 0.01      | 54.4      | -0.01 Chad                             |
|          | 0.31      | 0.38     | 8.40      | 0.33      | 82.7      | -0.44 Channel Islands                  |
|          | 1.17      | 1.46     | 7.36      | 0.87      | 78.8      | -1.45 Chile                            |
|          | 0.00      | 0.01     | 7.67      | 0.00      | 77.1      | 0.00 China                             |
|          | 0.02      | 0.02     | 7.27      | 0.02      | 84.9      | -0.03 China, Hong Kong SAR             |
|          | 0.00      | 0.00     | 8.09      | 0.00      | 80.6      | 0.00 China, Taiwan                     |
|          | 1.55      | 1.94     | 6.69      | 0.85      | 75.7      | -1.68 Colombia                         |

|      |      |       |      |      |                     |
|------|------|-------|------|------|---------------------|
| 0.07 | 0.08 | 7.13  | 0.01 | 64.5 | -0.03 Comoros       |
| 0.11 | 0.14 | 6.68  | 0.02 | 64.6 | -0.05 Congo         |
| 0.67 | 0.84 | 5.83  | 0.43 | 79.5 | -0.91 Costa Rica    |
| 0.03 | 0.04 | 9.82  | 0.01 | 58.0 | -0.01 Cote d'Ivoire |
| 0.80 | 1.00 | 14.26 | 0.95 | 77.8 | -0.74 Croatia       |
| 0.01 | 0.02 | 9.49  | 0.01 | 78.9 | -0.02 Cuba          |
| 0.09 | 0.11 | 9.41  | 0.09 | 78.7 | -0.11 Curacao       |
| 0.12 | 0.15 | 7.53  | 0.10 | 80.9 | -0.14 Cyprus        |
| 1.00 | 1.25 | 11.96 | 1.08 | 78.4 | -1.01 Czechia       |
| 0.04 | 0.04 | 9.17  | 0.01 | 60.9 | -0.02 Democratic R  |
| 0.19 | 0.24 | 10.19 | 0.22 | 80.7 | -0.24 Denmark       |
| 0.22 | 0.27 | 7.17  | 0.06 | 67.1 | -0.12 Djibouti      |
| 0.45 | 0.57 | 6.57  | 0.22 | 73.7 | -0.52 Dominican R   |
| 1.64 | 2.05 | 6.05  | 0.80 | 75.3 | -1.83 Ecuador       |
| 0.23 | 0.28 | 5.85  | 0.07 | 72.0 | -0.15 Egypt         |
| 0.41 | 0.52 | 7.40  | 0.20 | 72.9 | -0.36 El Salvador   |
| 0.41 | 0.52 | 8.95  | 0.06 | 59.0 | -0.14 Equatorial Gt |
| 0.15 | 0.18 | 12.40 | 0.17 | 78.4 | -0.15 Estonia       |
| 0.85 | 1.06 | 9.46  | 0.18 | 60.0 | -0.29 Eswatini      |
| 0.08 | 0.10 | 6.40  | 0.02 | 66.8 | -0.05 Ethiopia      |
| 0.08 | 0.10 | 10.19 | 0.10 | 81.9 | -0.11 Finland       |
| 0.69 | 0.86 | 10.62 | 0.99 | 81.6 | -1.10 France        |
| 0.79 | 0.98 | 3.34  | 0.24 | 79.3 | -0.78 French Guiar  |
| 0.13 | 0.16 | 6.78  | 0.03 | 66.5 | -0.06 Gabon         |
| 0.32 | 0.41 | 7.63  | 0.05 | 62.2 | -0.13 Gambia        |
| 0.79 | 0.99 | 13.23 | 0.63 | 73.2 | -0.52 Georgia       |
| 0.28 | 0.35 | 12.03 | 0.40 | 81.1 | -0.38 Germany       |
| 0.05 | 0.06 | 7.23  | 0.01 | 64.3 | -0.02 Ghana         |
| 0.31 | 0.39 | 11.93 | 0.46 | 81.9 | -0.44 Greece        |
| 0.34 | 0.42 | 9.19  | 0.39 | 81.5 | -0.52 Guadeloupe    |
| 1.18 | 1.48 | 6.21  | 0.72 | 79.0 | -1.30 Guam          |
| 0.82 | 1.02 | 5.09  | 0.27 | 73.6 | -0.82 Guatemala     |
| 0.04 | 0.05 | 8.16  | 0.01 | 61.7 | -0.02 Guinea        |
| 0.15 | 0.19 | 9.38  | 0.02 | 58.4 | -0.05 Guinea-Bissa  |
| 0.47 | 0.58 | 7.80  | 0.21 | 69.6 | -0.45 Guyana        |
| 0.07 | 0.09 | 8.49  | 0.02 | 64.2 | -0.04 Haiti         |
| 0.98 | 1.22 | 4.88  | 0.32 | 74.4 | -1.01 Honduras      |
| 0.90 | 1.13 | 13.90 | 0.99 | 76.0 | -0.80 Hungary       |
| 0.09 | 0.11 | 7.07  | 0.08 | 83.0 | -0.13 Iceland       |
| 0.27 | 0.33 | 7.55  | 0.11 | 69.7 | -0.18 India         |
| 0.20 | 0.25 | 6.76  | 0.08 | 71.7 | -0.14 Indonesia     |
| 1.43 | 1.78 | 5.57  | 0.66 | 75.6 | -1.24 Iran (Islamic |
| 1.39 | 1.73 | 5.09  | 0.32 | 69.8 | -0.86 Iraq          |

|    |      |      |       |      |      |       |               |
|----|------|------|-------|------|------|-------|---------------|
|    | 0.52 | 0.65 | 6.85  | 0.45 | 81.7 | -0.71 | Ireland       |
| NA | NA   | NA   | NA    | NA   | NA   |       | Isle of Man   |
|    | 0.52 | 0.65 | 5.85  | 0.38 | 82.3 | -0.75 | Israel        |
|    | 0.76 | 0.95 | 12.13 | 1.23 | 82.4 | -1.16 | Italy         |
|    | 0.18 | 0.22 | 7.73  | 0.10 | 74.4 | -0.15 | Jamaica       |
|    | 0.01 | 0.02 | 11.62 | 0.03 | 84.6 | -0.03 | Japan         |
|    | 1.44 | 1.80 | 4.35  | 0.38 | 73.7 | -1.02 | Jordan        |
|    | 0.33 | 0.41 | 7.42  | 0.15 | 73.1 | -0.23 | Kazakhstan    |
|    | 0.19 | 0.23 | 5.50  | 0.03 | 66.6 | -0.10 | Kenya         |
|    | 0.74 | 0.93 | 3.29  | 0.22 | 75.3 | -0.47 | Kuwait        |
|    | 0.71 | 0.89 | 6.07  | 0.21 | 71.1 | -0.39 | Kyrgyzstan    |
|    | 0.28 | 0.35 | 15.46 | 0.34 | 74.9 | -0.25 | Latvia        |
|    | 0.44 | 0.55 | 4.87  | 0.22 | 78.6 | -0.47 | Lebanon       |
|    | 0.08 | 0.10 | 7.41  | 0.02 | 64.2 | -0.04 | Liberia       |
|    | 0.72 | 0.90 | 5.42  | 0.22 | 72.6 | -0.46 | Libya         |
| NA | NA   | NA   | NA    | NA   | NA   |       | Liechtensteir |
|    | 0.41 | 0.52 | 15.09 | 0.54 | 75.4 | -0.42 | Lithuania     |
|    | 0.83 | 1.03 | 8.08  | 0.79 | 81.2 | -1.10 | Luxembourg    |
|    | 0.06 | 0.07 | 5.93  | 0.01 | 67.3 | -0.03 | Madagascar    |
|    | 0.06 | 0.08 | 6.41  | 0.01 | 64.4 | -0.03 | Malawi        |
|    | 0.03 | 0.04 | 5.41  | 0.01 | 76.3 | -0.03 | Malaysia      |
|    | 0.36 | 0.44 | 2.81  | 0.09 | 79.0 | -0.33 | Maldives      |
|    | 0.09 | 0.11 | 9.24  | 0.01 | 59.6 | -0.03 | Mali          |
|    | 0.45 | 0.57 | 9.34  | 0.50 | 82.0 | -0.57 | Malta         |
|    | 0.08 | 0.11 | 9.92  | 0.11 | 82.3 | -0.13 | Martinique    |
|    | 0.38 | 0.48 | 7.15  | 0.07 | 64.8 | -0.18 | Mauritania    |
|    | 0.01 | 0.01 | 8.88  | 0.01 | 75.1 | -0.01 | Mauritius     |
|    | 0.75 | 0.94 | 3.03  | 0.20 | 78.7 | -0.89 | Mayotte       |
|    | 2.01 | 2.51 | 7.18  | 0.98 | 73.3 | -1.83 | Mexico (Cour  |
| NA | NA   | NA   | NA    | NA   | NA   |       | Monaco        |
|    | 1.29 | 1.61 | 11.92 | 1.09 | 75.9 | -1.01 | Montenegro    |
| NA | NA   | NA   | NA    | NA   | NA   |       | Montserrat    |
|    | 0.44 | 0.55 | 5.40  | 0.20 | 76.5 | -0.37 | Morocco       |
|    | 0.04 | 0.05 | 8.16  | 0.01 | 60.9 | -0.01 | Mozambique    |
|    | 0.14 | 0.18 | 8.47  | 0.05 | 67.1 | -0.07 | Myanmar       |
|    | 0.24 | 0.30 | 6.44  | 0.06 | 70.8 | -0.12 | Nepal         |
|    | 0.55 | 0.69 | 9.82  | 0.67 | 81.6 | -0.75 | Netherlands   |
|    | 0.01 | 0.01 | 7.26  | 0.01 | 82.4 | -0.01 | New Zealand   |
|    | 0.07 | 0.09 | 5.22  | 0.02 | 74.5 | -0.07 | Nicaragua     |
|    | 0.03 | 0.04 | 7.90  | 0.00 | 62.7 | -0.01 | Niger         |
|    | 0.04 | 0.05 | 11.47 | 0.01 | 54.9 | -0.01 | Nigeria       |
|    | 1.57 | 1.96 | 11.52 | 1.20 | 74.8 | -1.14 | North Maced   |
| NA | NA   | NA   | NA    | NA   | NA   |       | Northern Ma   |

|    |      |      |       |      |      |       |               |
|----|------|------|-------|------|------|-------|---------------|
|    | 0.08 | 0.09 | 8.09  | 0.08 | 82.4 | -0.11 | Norway        |
|    | 1.28 | 1.60 | 2.79  | 0.29 | 77.0 | -1.33 | Oman          |
|    | 0.16 | 0.21 | 6.98  | 0.05 | 67.3 | -0.10 | Pakistan      |
|    | 1.61 | 2.02 | 6.24  | 0.93 | 76.5 | -2.22 | Panama        |
|    | 0.78 | 0.97 | 5.99  | 0.32 | 73.7 | -0.70 | Paraguay      |
|    | 2.14 | 2.68 | 7.07  | 1.14 | 74.8 | -2.09 | Peru          |
|    | 0.22 | 0.27 | 6.13  | 0.08 | 71.2 | -0.19 | Philippines   |
|    | 0.69 | 0.87 | 11.34 | 0.75 | 78.0 | -0.78 | Poland        |
|    | 0.48 | 0.61 | 11.92 | 0.68 | 81.4 | -0.63 | Portugal      |
|    | 0.43 | 0.53 | 10.87 | 0.53 | 79.5 | -0.57 | Puerto Rico   |
|    | 0.38 | 0.48 | 1.46  | 0.09 | 80.2 | -0.51 | Qatar         |
|    | 0.02 | 0.02 | 6.74  | 0.02 | 82.9 | -0.03 | Republic of K |
|    | 1.09 | 1.37 | 12.68 | 0.74 | 71.2 | -0.65 | Republic of M |
|    | 0.08 | 0.10 | 6.43  | 0.05 | 80.6 | -0.09 | Reunion       |
|    | 0.78 | 0.97 | 14.05 | 0.82 | 75.4 | -0.65 | Romania       |
|    | 0.46 | 0.58 | 13.24 | 0.39 | 72.1 | -0.33 | Russian Fede  |
|    | 0.05 | 0.06 | 5.25  | 0.01 | 69.1 | -0.02 | Rwanda        |
| NA | NA   | NA   | NA    | NA   | NA   | NA    | Saint Martin  |
| NA | NA   | NA   | NA    | NA   | NA   | NA    | San Marino    |
|    | 0.45 | 0.56 | 4.76  | 0.08 | 70.2 | -0.23 | Sao Tome an   |
|    | 0.61 | 0.76 | 3.87  | 0.18 | 75.0 | -0.46 | Saudi Arabia  |
|    | 0.14 | 0.17 | 5.57  | 0.02 | 67.9 | -0.07 | Senegal       |
|    | 0.53 | 0.66 | 13.74 | 0.52 | 75.7 | -0.41 | Serbia        |
|    | 0.06 | 0.07 | 11.40 | 0.01 | 54.9 | -0.02 | Sierra Leone  |
| NA | NA   | NA   | NA    | NA   | NA   | NA    | Siint Maarter |
|    | 0.01 | 0.01 | 5.09  | 0.00 | 83.7 | -0.01 | Singapore     |
|    | 0.46 | 0.58 | 10.68 | 0.39 | 77.1 | -0.40 | Slovakia      |
|    | 1.04 | 1.31 | 11.82 | 1.30 | 80.1 | -1.24 | Slovenia      |
|    | 0.05 | 0.06 | 10.56 | 0.01 | 57.6 | -0.02 | Somalia       |
|    | 1.54 | 1.92 | 9.99  | 0.48 | 63.6 | -0.64 | South Africa  |
|    | 0.03 | 0.04 | 10.24 | 0.01 | 58.0 | -0.01 | South Sudan   |
|    | 0.77 | 0.97 | 10.77 | 1.09 | 82.4 | -1.18 | Spain         |
|    | 0.02 | 0.02 | 7.01  | 0.01 | 77.0 | -0.01 | Sri Lanka     |
|    | 1.33 | 1.66 | 3.77  | 0.27 | 73.3 | -0.93 | State of Pale |
|    | 0.14 | 0.18 | 7.15  | 0.03 | 65.4 | -0.09 | Sudan         |
|    | 0.49 | 0.62 | 7.74  | 0.21 | 71.5 | -0.33 | Suriname      |
|    | 0.70 | 0.88 | 10.05 | 0.86 | 81.9 | -0.96 | Sweden        |
|    | 0.70 | 0.88 | 9.20  | 0.88 | 82.7 | -1.07 | Switzerland   |
|    | 0.13 | 0.17 | 5.07  | 0.04 | 73.7 | -0.10 | Syrian Arab F |
|    | 0.05 | 0.06 | 4.74  | 0.01 | 71.2 | -0.02 | Tajikistan    |
|    | 0.00 | 0.00 | 8.17  | 0.00 | 77.2 | 0.00  | Thailand      |
|    | 0.05 | 0.06 | 8.27  | 0.01 | 61.3 | -0.02 | Togo          |
|    | 0.14 | 0.18 | 8.89  | 0.09 | 73.5 | -0.12 | Trinidad and  |

|    |      |      |       |      |      |       |                |
|----|------|------|-------|------|------|-------|----------------|
|    | 0.74 | 0.92 | 6.78  | 0.40 | 76.2 | -0.63 | Tunisia        |
|    | 0.46 | 0.58 | 5.90  | 0.25 | 77.3 | -0.46 | Turkey         |
| NA | NA   | NA   | NA    | NA   | NA   |       | Turks and Cai  |
|    | 0.48 | 0.59 | 15.40 | 0.44 | 71.6 | -0.31 | Ukraine        |
|    | 0.32 | 0.40 | 1.77  | 0.07 | 78.1 | -0.32 | United Arab I  |
|    | 0.91 | 1.13 | 10.59 | 1.08 | 80.2 | -1.18 | United Kingd   |
|    | 0.00 | 0.00 | 6.26  | 0.00 | 65.6 | 0.00  | United Reput   |
|    | 1.00 | 1.25 | 10.10 | 1.04 | 77.7 | -1.26 | United State:  |
|    | 0.22 | 0.28 | 9.53  | 0.22 | 80.4 | -0.25 | United State:  |
|    | 0.06 | 0.07 | 9.71  | 0.05 | 77.8 | -0.06 | Uruguay        |
|    | 0.06 | 0.07 | 5.90  | 0.02 | 71.7 | -0.04 | Uzbekistan     |
|    | 0.08 | 0.10 | 7.33  | 0.04 | 72.2 | -0.06 | Venezuela (B   |
|    | 0.13 | 0.16 | 6.00  | 0.02 | 66.1 | -0.06 | Yemen          |
|    | 0.15 | 0.19 | 6.35  | 0.02 | 63.8 | -0.07 | Zambia         |
|    | 0.13 | 0.17 | 7.84  | 0.02 | 61.3 | -0.05 | Zimbabwe       |
|    | 1.64 | 2.05 | NA    | NA   | NA   |       | Acre           |
|    | 1.32 | 1.65 | NA    | NA   | NA   |       | Alagoas        |
|    | 1.97 | 2.46 | NA    | NA   | NA   |       | Amapa          |
|    | 2.21 | 2.77 | NA    | NA   | NA   |       | Amazonas (B    |
|    | 1.08 | 1.35 | NA    | NA   | NA   |       | Bahia          |
|    | 1.91 | 2.38 | NA    | NA   | NA   |       | Ceara          |
|    | 2.49 | 3.11 | NA    | NA   | NA   |       | Distrito Fede  |
|    | 2.26 | 2.82 | NA    | NA   | NA   |       | Espirito Santi |
|    | 1.69 | 2.11 | NA    | NA   | NA   |       | Goias          |
|    | 1.12 | 1.40 | NA    | NA   | NA   |       | Maranhao       |
|    | 2.29 | 2.87 | NA    | NA   | NA   |       | Mato Grosso    |
|    | 1.49 | 1.86 | NA    | NA   | NA   |       | Mato Grosso    |
|    | 0.99 | 1.24 | NA    | NA   | NA   |       | Minas Gerais   |
|    | 1.49 | 1.86 | NA    | NA   | NA   |       | Para           |
|    | 1.63 | 2.03 | NA    | NA   | NA   |       | Paraiba        |
|    | 1.22 | 1.52 | NA    | NA   | NA   |       | Parana         |
|    | 1.75 | 2.19 | NA    | NA   | NA   |       | Pernambuco     |
|    | 1.58 | 1.98 | NA    | NA   | NA   |       | Piaui          |
|    | 2.52 | 3.14 | NA    | NA   | NA   |       | Rio de Janeir  |
|    | 1.50 | 1.88 | NA    | NA   | NA   |       | Rio Grande d   |
|    | 1.35 | 1.69 | NA    | NA   | NA   |       | Rio Grande d   |
|    | 1.88 | 2.34 | NA    | NA   | NA   |       | Rondonia       |
|    | 2.32 | 2.90 | NA    | NA   | NA   |       | Roraima        |
|    | 1.28 | 1.60 | NA    | NA   | NA   |       | Santa Catarir  |
|    | 1.72 | 2.15 | NA    | NA   | NA   |       | Sao Paulo      |
|    | 1.93 | 2.41 | NA    | NA   | NA   |       | Sergipe        |
|    | 1.47 | 1.84 | NA    | NA   | NA   |       | Tocantins      |
|    | 0.00 | 0.00 | NA    | NA   | NA   |       | Anhui          |

|      |      |       |      |      |       |               |
|------|------|-------|------|------|-------|---------------|
| 0.00 | 0.00 | NA    | NA   | NA   | NA    | Beijing       |
| 0.00 | 0.00 | NA    | NA   | NA   | NA    | Chongqing     |
| 0.00 | 0.00 | NA    | NA   | NA   | NA    | Fujian        |
| 0.00 | 0.00 | NA    | NA   | NA   | NA    | Gansu         |
| 0.00 | 0.00 | NA    | NA   | NA   | NA    | Guangdong     |
| 0.00 | 0.00 | NA    | NA   | NA   | NA    | Guangxi       |
| 0.00 | 0.00 | NA    | NA   | NA   | NA    | Guizhou       |
| 0.00 | 0.00 | NA    | NA   | NA   | NA    | Hainan        |
| 0.00 | 0.00 | NA    | NA   | NA   | NA    | Hebei         |
| 0.00 | 0.00 | NA    | NA   | NA   | NA    | Heilongjiang  |
| 0.00 | 0.00 | NA    | NA   | NA   | NA    | Henan         |
| 0.09 | 0.11 | NA    | NA   | NA   | NA    | Hubei         |
| 0.00 | 0.00 | NA    | NA   | NA   | NA    | Hunan         |
| 0.00 | 0.00 | NA    | NA   | NA   | NA    | Inner Mongol  |
| 0.00 | 0.00 | NA    | NA   | NA   | NA    | Jiangxi       |
| 0.00 | 0.00 | NA    | NA   | NA   | NA    | Jilin         |
| 0.00 | 0.00 | NA    | NA   | NA   | NA    | Liaoning      |
| 0.00 | 0.00 | NA    | NA   | NA   | NA    | Shaanxi       |
| 0.00 | 0.00 | NA    | NA   | NA   | NA    | Shandong      |
| 0.00 | 0.00 | NA    | NA   | NA   | NA    | Shanghai      |
| 0.00 | 0.00 | NA    | NA   | NA   | NA    | Sichuan       |
| 0.00 | 0.00 | NA    | NA   | NA   | NA    | Tianjin       |
| 0.00 | 0.00 | NA    | NA   | NA   | NA    | Xinjiang      |
| 0.00 | 0.00 | NA    | NA   | NA   | NA    | Yunnan        |
| 0.00 | 0.00 | NA    | NA   | NA   | NA    | Zhejiang      |
| 0.57 | 0.71 | 12.66 | 0.92 | 82.0 | -0.83 | Abruzzo       |
| 0.30 | 0.37 | 12.09 | 0.45 | 81.7 | -0.42 | Basilicata    |
| 1.04 | 1.29 | 10.34 | 1.39 | 81.8 | -1.57 | Bolzano (Pro  |
| 0.17 | 0.21 | 11.00 | 0.24 | 81.8 | -0.24 | Calabria      |
| 0.40 | 0.50 | 10.18 | 0.49 | 80.7 | -0.53 | Campania      |
| 1.00 | 1.25 | 13.28 | 1.73 | 81.8 | -1.54 | Emilia-Roma   |
| 0.77 | 0.96 | 13.55 | 1.35 | 82.2 | -1.16 | Friuli-Venezi |
| 0.43 | 0.54 | 10.94 | 0.64 | 82.2 | -0.65 | Lazio         |
| 0.92 | 1.16 | 16.50 | 1.86 | 81.3 | -1.33 | Liguria       |
| 1.56 | 1.95 | 12.90 | 2.49 | 80.9 | -2.32 | Lombardia     |
| 0.58 | 0.73 | 12.89 | 1.03 | 82.8 | -0.91 | Marche        |
| 0.37 | 0.46 | 13.23 | 0.62 | 82.4 | -0.54 | Molise        |
| 1.04 | 1.30 | 14.58 | 1.81 | 81.0 | -1.45 | Piemonte      |
| 0.42 | 0.52 | 10.82 | 0.61 | 82.2 | -0.63 | Puglia        |
| 0.30 | 0.37 | 11.06 | 0.45 | 82.6 | -0.46 | Sardegna      |
| 0.35 | 0.43 | 11.30 | 0.48 | 81.0 | -0.47 | Sicilia       |
| 0.57 | 0.71 | 13.01 | 0.98 | 82.7 | -0.86 | Toscana       |
| 1.17 | 1.46 | 11.47 | 1.74 | 82.0 | -1.81 | Trento (Provi |



|      |      |       |      |      |                     |
|------|------|-------|------|------|---------------------|
| 0.40 | 0.51 | 12.77 | 0.71 | 83.1 | -0.63 Umbria        |
| 1.89 | 2.36 | 15.30 | 3.01 | 79.2 | -2.36 Valle d'Aosta |
| 0.83 | 1.03 | 11.77 | 1.33 | 82.2 | -1.29 Veneto        |
| 2.63 | 3.28 | 6.25  | 1.01 | 73.6 | -2.23 Aguascalient  |
| 4.32 | 5.40 | 6.30  | 1.53 | 72.4 | -3.54 Baja Californ |
| 3.00 | 3.74 | 5.87  | 1.07 | 73.3 | -2.60 Baja Californ |
| 2.37 | 2.96 | 7.08  | 1.02 | 72.8 | -1.96 Campeche      |
| 0.61 | 0.76 | 5.74  | 0.22 | 73.7 | -0.54 Chiapas       |
| 2.83 | 3.54 | 6.78  | 1.15 | 73.1 | -2.37 Chihuahua     |
| 2.73 | 3.42 | 8.48  | 1.63 | 73.9 | -2.56 Ciudad de Me  |
| 3.09 | 3.85 | 6.96  | 1.33 | 73.1 | -2.64 Coahuila de Z |
| 2.33 | 2.91 | 7.37  | 1.07 | 73.6 | -1.93 Colima        |
| 1.72 | 2.15 | 7.03  | 0.83 | 73.5 | -1.58 Durango       |
| 1.89 | 2.36 | 6.95  | 0.85 | 73.5 | -1.64 Guanajuato    |
| 1.41 | 1.76 | 8.03  | 0.70 | 72.1 | -1.13 Guerrero      |
| 2.23 | 2.79 | 7.70  | 1.11 | 73.1 | -1.91 Hidalgo       |
| 1.45 | 1.81 | 6.99  | 0.71 | 74.1 | -1.34 Jalisco       |
| 2.81 | 3.51 | 6.34  | 1.09 | 73.0 | -2.43 Mexico (Stat  |
| 1.01 | 1.26 | 7.67  | 0.55 | 73.9 | -0.93 Michoacan d   |
| 1.36 | 1.69 | 7.53  | 0.71 | 74.0 | -1.22 Morelos       |
| 1.61 | 2.01 | 7.64  | 0.84 | 73.9 | -1.42 Nayarit       |
| 2.23 | 2.78 | 6.67  | 0.96 | 74.0 | -1.97 Nuevo Leon    |
| 0.86 | 1.08 | 8.10  | 0.48 | 73.3 | -0.76 Oaxaca        |
| 1.81 | 2.26 | 7.26  | 0.86 | 73.1 | -1.59 Puebla        |
| 2.24 | 2.80 | 6.23  | 0.90 | 73.6 | -2.00 Queretaro     |
| 4.96 | 6.20 | 5.33  | 1.35 | 71.6 | -3.93 Quintana Ro   |
| 1.91 | 2.39 | 8.02  | 1.03 | 73.2 | -1.67 San Luis Potc |
| 2.73 | 3.41 | 7.73  | 1.32 | 72.8 | -2.30 Sinaloa       |
| 3.12 | 3.90 | 7.24  | 1.35 | 72.8 | -2.58 Sonora        |
| 3.09 | 3.85 | 6.83  | 1.25 | 72.5 | -2.55 Tabasco       |
| 1.99 | 2.49 | 6.98  | 0.89 | 73.5 | -1.72 Tamaulipas    |
| 2.35 | 2.94 | 7.16  | 1.05 | 73.2 | -1.98 Tlaxcala      |
| 1.35 | 1.68 | 7.97  | 0.72 | 73.3 | -1.16 Veracruz de l |
| 1.99 | 2.48 | 7.95  | 1.01 | 73.0 | -1.66 Yucatan       |
| 1.88 | 2.35 | 8.10  | 1.03 | 73.4 | -1.65 Zacatecas     |
| 1.25 | 1.56 | 13.72 | 0.60 | 68.3 | -0.68 Amazonas (P   |
| 2.03 | 2.53 | 16.52 | 1.25 | 69.9 | -1.33 Ancash        |
| 0.60 | 0.75 | 16.52 | 0.35 | 68.4 | -0.34 Apurimac      |
| 1.85 | 2.31 | 13.46 | 1.05 | 71.7 | -1.35 Arequipa      |
| 1.00 | 1.25 | 15.46 | 0.55 | 68.7 | -0.57 Ayacucho      |
| 0.74 | 0.92 | 14.55 | 0.41 | 70.4 | -0.46 Cajamarca     |
| 3.28 | 4.10 | 13.04 | 1.77 | 71.9 | -2.31 Callao        |
| 0.80 | 1.00 | 13.71 | 0.39 | 68.2 | -0.46 Cusco         |

|      |      |       |      |      |                      |
|------|------|-------|------|------|----------------------|
| 0.67 | 0.83 | 16.70 | 0.38 | 68.2 | -0.35 Huancavelica   |
| 1.28 | 1.60 | 13.14 | 0.61 | 68.8 | -0.79 Huanuco        |
| 3.56 | 4.45 | 13.34 | 1.88 | 71.0 | -2.46 Ica            |
| 1.37 | 1.71 | 13.73 | 0.69 | 68.8 | -0.84 Junin          |
| 2.32 | 2.89 | 13.60 | 1.24 | 70.9 | -1.63 La Libertad    |
| 2.55 | 3.19 | 13.86 | 1.44 | 71.0 | -1.82 Lambayeque     |
| 2.77 | 3.46 | 13.64 | 1.57 | 71.8 | -1.96 Lima           |
| 2.66 | 3.32 | 11.08 | 1.03 | 68.5 | -1.46 Loreto         |
| 3.42 | 4.28 | 7.48  | 0.98 | 68.2 | -1.99 Madre de Dic   |
| 2.65 | 3.30 | 14.57 | 1.56 | 70.9 | -1.81 Moquegua       |
| 1.11 | 1.39 | 11.91 | 0.48 | 68.8 | -0.68 Pasco          |
| 2.12 | 2.65 | 13.05 | 1.07 | 70.2 | -1.34 Piura          |
| 0.54 | 0.68 | 15.30 | 0.31 | 68.2 | -0.33 Puno           |
| 2.11 | 2.64 | 11.55 | 0.88 | 68.4 | -1.20 San Martin     |
| 1.55 | 1.94 | 11.19 | 0.73 | 70.6 | -1.03 Tacna          |
| 3.04 | 3.79 | 11.54 | 1.37 | 69.7 | -1.86 Tumbes         |
| 2.03 | 2.54 | 9.72  | 0.71 | 68.0 | -1.16 Ucayali        |
| 0.52 | 0.65 | 9.94  | 0.61 | 81.5 | -0.68 Andalucia      |
| 1.22 | 1.53 | 13.52 | 2.00 | 82.0 | -1.81 Aragon         |
| 0.72 | 0.89 | 15.13 | 1.31 | 82.0 | -1.02 Asturias (Prir |
| 0.38 | 0.47 | 7.89  | 0.41 | 83.1 | -0.57 Balears (Illes |
| 0.18 | 0.23 | 8.16  | 0.19 | 82.3 | -0.26 Canarias       |
| 0.44 | 0.55 | 11.86 | 0.68 | 83.1 | -0.66 Cantabria      |
| 1.10 | 1.37 | 15.35 | 2.12 | 82.6 | -1.71 Castilla y Leo |
| 1.38 | 1.73 | 12.47 | 2.02 | 81.9 | -1.98 Castilla-La M  |
| 0.85 | 1.06 | 10.51 | 1.14 | 82.5 | -1.27 Catalonia      |
| 0.90 | 1.12 | 7.61  | 0.71 | 80.0 | -1.04 Ceuta          |
| 0.44 | 0.56 | 10.29 | 0.59 | 82.3 | -0.64 Comunitat V    |
| 0.65 | 0.82 | 12.62 | 1.00 | 82.1 | -0.92 Extremadura    |
| 0.29 | 0.36 | 13.52 | 0.51 | 83.0 | -0.44 Galicia        |
| 1.39 | 1.73 | 9.62  | 1.79 | 82.8 | -2.26 Madrid (Com    |
| 0.71 | 0.88 | 6.95  | 0.50 | 79.9 | -0.79 Melilla        |
| 0.47 | 0.58 | 8.75  | 0.50 | 82.4 | -0.63 Murcia (Regi   |
| 1.05 | 1.31 | 11.03 | 1.47 | 82.9 | -1.58 Navarra (C. F  |
| 0.84 | 1.04 | 12.17 | 1.35 | 82.7 | -1.30 Pais Vasco     |
| 1.18 | 1.48 | 12.76 | 1.86 | 82.3 | -1.76 Rioja, La      |
| 1.01 | 1.26 | 12.34 | 0.98 | 74.7 | -0.94 Alabama        |
| 0.41 | 0.51 | 7.01  | 0.28 | 78.2 | -0.51 Alaska         |
| 1.19 | 1.49 | 9.84  | 1.22 | 78.2 | -1.58 Arizona        |
| 1.22 | 1.53 | 12.37 | 1.21 | 74.9 | -1.17 Arkansas       |
| 0.69 | 0.86 | 7.89  | 0.65 | 80.0 | -1.02 California     |
| 0.97 | 1.21 | 8.08  | 0.84 | 78.9 | -1.24 Colorado       |
| 1.50 | 1.87 | 10.92 | 1.66 | 78.4 | -1.85 Connecticut    |

|      |      |       |      |      |                      |
|------|------|-------|------|------|----------------------|
| 0.90 | 1.12 | 10.97 | 0.95 | 77.5 | -1.03 Delaware       |
| 1.46 | 1.83 | 8.80  | 1.10 | 76.2 | -1.72 District of Co |
| 0.79 | 0.98 | 11.14 | 1.00 | 78.7 | -1.15 Florida        |
| 1.24 | 1.55 | 9.47  | 1.03 | 76.4 | -1.34 Georgia (US/   |
| 0.18 | 0.22 | 8.62  | 0.20 | 81.8 | -0.30 Hawaii         |
| 0.88 | 1.10 | 9.35  | 0.81 | 78.3 | -1.01 Idaho          |
| 1.41 | 1.76 | 10.45 | 1.40 | 77.5 | -1.64 Illinois       |
| 1.26 | 1.57 | 11.38 | 1.22 | 75.9 | -1.28 Indiana        |
| 1.15 | 1.43 | 11.15 | 1.22 | 77.9 | -1.30 Iowa           |
| 0.94 | 1.17 | 10.59 | 0.93 | 77.5 | -1.05 Kansas         |
| 0.60 | 0.75 | 12.06 | 0.58 | 74.8 | -0.56 Kentucky       |
| 1.72 | 2.14 | 11.57 | 1.59 | 74.7 | -1.71 Louisiana      |
| 0.21 | 0.26 | 12.03 | 0.26 | 78.3 | -0.24 Maine          |
| 1.02 | 1.28 | 9.58  | 0.96 | 77.8 | -1.25 Maryland       |
| 1.72 | 2.15 | 10.67 | 1.78 | 77.9 | -2.05 Massachuset    |
| 1.23 | 1.53 | 11.59 | 1.29 | 76.6 | -1.33 Michigan       |
| 0.97 | 1.21 | 9.27  | 0.95 | 79.4 | -1.21 Minnesota      |
| 1.75 | 2.18 | 12.59 | 1.59 | 73.7 | -1.52 Mississippi    |
| 0.89 | 1.11 | 11.35 | 0.92 | 76.6 | -0.97 Missouri       |
| 0.84 | 1.05 | 10.79 | 0.89 | 77.8 | -0.97 Montana        |
| 0.87 | 1.09 | 9.89  | 0.85 | 78.6 | -1.02 Nebraska       |
| 1.12 | 1.40 | 9.77  | 1.02 | 77.1 | -1.29 Nevada         |
| 0.52 | 0.65 | 10.59 | 0.55 | 78.5 | -0.60 New Hampsf     |
| 2.02 | 2.52 | 10.94 | 2.11 | 77.6 | -2.43 New Jersey     |
| 1.17 | 1.47 | 10.62 | 1.17 | 76.7 | -1.39 New Mexico     |
| 1.81 | 2.26 | 10.45 | 1.92 | 78.2 | -2.35 New York       |
| 0.68 | 0.86 | 10.15 | 0.64 | 77.2 | -0.75 North Carolir  |
| 1.70 | 2.13 | 10.54 | 1.68 | 77.7 | -2.02 North Dakota   |
| 0.72 | 0.91 | 11.67 | 0.76 | 76.3 | -0.76 Ohio           |
| 0.66 | 0.82 | 11.27 | 0.62 | 75.5 | -0.66 Oklahoma       |
| 0.33 | 0.42 | 9.59  | 0.35 | 79.1 | -0.42 Oregon         |
| 1.08 | 1.35 | 12.18 | 1.23 | 77.0 | -1.20 Pennsylvania   |
| 1.55 | 1.94 | 11.39 | 1.66 | 77.8 | -1.79 Rhode Island   |
| 1.04 | 1.29 | 11.36 | 1.03 | 76.0 | -1.08 South Carolir  |
| 1.66 | 2.08 | 11.16 | 1.67 | 77.4 | -1.85 South Dakota   |
| 1.06 | 1.33 | 11.74 | 1.01 | 75.2 | -1.03 Tennessee      |
| 1.24 | 1.55 | 8.23  | 0.96 | 77.5 | -1.47 Texas          |
| 0.60 | 0.76 | 6.61  | 0.40 | 78.8 | -0.70 Utah           |
| 0.19 | 0.24 | 10.36 | 0.21 | 79.1 | -0.23 Vermont        |
| 0.62 | 0.78 | 9.16  | 0.58 | 78.5 | -0.76 Virginia       |
| 0.45 | 0.57 | 8.39  | 0.45 | 79.5 | -0.63 Washington     |
| 0.67 | 0.83 | 14.10 | 0.73 | 74.6 | -0.59 West Virgini:  |
| 0.84 | 1.05 | 10.44 | 0.89 | 78.4 | -0.99 Wisconsin      |

0.87      1.09      9.43      0.75      78.1      -0.98 Wyoming

Barbuda

national State of)  
Herzegovina

Islands  
Maldives

Islands  
Cape Verde Republic

Islands

Hong Kong SAR  
Mainland Province of China

Republic of the Congo

Republic

Guinea

Guinea

Guinea

Republic of)

1

try)

:

1

lonia  
rianas

Corea  
Moldova

eration

(French part)

id Principe

n (Dutch part)

stine

Republic

Tobago



icos Islands

Emirates

om

olic of Tanzania

s of America

s Virgin Islands

olivarian Republic of)

IR)

ral

o

do Sul

;

o

lo Norte

lo Sul

ra

lia

vincia autonoma di)

gna  
a Giulia

ncia autonoma di)

Vallee d'Aoste

es  
ia  
ia Sur

exico  
aragoza

e)  
e Ocampo

o  
osi

Ignacio de la Llave

'E)

DS

icipado de)  
)

in  
lancha

alenciana

unidad de)

on de)  
oral de)

lumbia

4)

ts

ire

ra  
l

ra  
l

a
